# Supplementary material for: Glucagon-like peptide-1 receptor activation stimulates PKA-mediated phosphorylation of Raptor and this contributes to the weight loss effect of liraglutide
Source: eLife journal article supplement (doi:10.7554/elife.80944), 2023-11-06
Supplement: supp [file eLife PKA Manuscript Rev 2 Figure 1-figure supplement 1 Raw Data.xlsx]

## Sheet: Sheet1
Fig. 1-Fig. Supp. 1A	Experiment #1				Experiment #2				Experiment #3									Ratio Phospho-S6/Total S6
Densitometry	Phospho-S6	Total S6	Ratio		Phospho-S6	Total S6	Ratio		Phospho-S6	Total S6	Ratio						Experiment	#1	#2	#3
Vehicle	2376.62	11098.7	0.214135		1377.57	10498.3	0.131218		1071.65	17412.5	0.0615448							0.214135	0.131218	0.0615448
Liraglutide	16880.5	13471.7	1.25303		11260.9	13520	0.832907		13337.6	15087.2	0.884031							1.25303	0.832907	0.884031
Vehicle+Rapamycin	445.849	11239.7	0.0396674		505.24	14863.4	0.0339921		106.828	13137.1	0.00813185							0.0396674	0.0339921	0.00813185
Liraglutide+Rapamycin	1803.5	12181.9	0.148048		502.503	13861.4	0.036252		651.213	14472	0.044998							0.148048	0.036252	0.044998
Fig. 1-Fig. Supp. 1B	Experiment #1				Experiment #2				Experiment #3				Experiment #4					Ratio Phospho-S6/Total S6
Densitometry	Phospho-S6	Total S6	Ratio		Phospho-S6	Total S6	Ratio		Phospho-S6	Total S6	Ratio		Phospho-S6	Total S6	Ratio		Experiment	#1	#2	#3	#4
Vehicle	916.406	4203.18	0.218027		876.698	4188.77	0.209297		1399.16	2848.26	0.491235		703.284	4215.43	0.166836			0.218027	0.209297	0.491235	0.166836
Liraglutide	6400.67	2344.08	2.73056		5766.31	3771.06	1.52909		4618.53	2301.3	2.00692		5450.6	5235.55	1.04107			2.73056	1.52909	2.00692	1.04107
Vehicle+H89	50.5	1009.3	0.0500344		49.95	1534.06	0.0325606		560.213	2536.08	0.220897		195.556	3226.45	0.0606103			0.0500344	0.0325606	0.220897	0.0606103
Liraglutide+H89	40.89	1299.36	0.0314695		30.121	1944.77	0.0154882		1018.75	1818.65	0.560168		1373.06	5513.38	0.249042			0.0314695	0.0154882	0.560168	0.249042
	Experiment #1				Experiment #2				Experiment #3				Experiment #4					Ratio Phospho-CREB/Total CREB
	Phospho-CREB	Total CREB	Ratio		Phospho-CREB	Total CREB	Ratio		Phospho-CREB	Total CREB	Ratio		Phospho-CREB	Total CREB	Ratio		Experiment	#1	#2	#3	#4
Vehicle	1534.09	2150.68	0.713301		786.346	1896.36	0.414661		982.549	2546.78	0.385801							0.713301	0.414661	0.385801
Liraglutide	7845.26	2256.32	3.47701		6896.36	1754.33	3.93105		7418.5	2003.48	3.70281							3.47701	3.93105	3.70281
Vehicle+H89	123.658	1869.7	0.066138		87.256	2001.33	0.0435991		203.125	2111.84	0.0961837							0.066138	0.0435991	0.0961837
Liraglutide+H89	181.567	1874.56	0.0968585		102.357	1784.57	0.0573566		158.957	1932.7	0.0822462							0.0968585	0.0573566	0.0822462
Fig. 1-Fig. Supp. 1C	Experiment #1				Experiment #2				Experiment #3				Experiment #4					Ratio Phospho-S6/Total S6
Densitometry	Phospho-S6	Total S6	Ratio		Phospho-S6	Total S6	Ratio		Phospho-S6	Total S6	Ratio		Phospho-S6	Total S6	Ratio		Experiment	#1	#2	#3	#4
Vehicle	1441.23	19377.2	0.0743779		1307.67	8219.7	0.15909		1131.28	5326.6	0.212384		949.577	4064.36	0.233635			0.0743779	0.15909	0.212384	0.233635
Liraglutide	19636.5	19447	1.00975		10291	7649.85	1.34525		5263.84	5027.01	1.04711		4282.06	3200.01	1.33814			1.00975	1.34525	1.04711	1.33814
Vehicle+KT5720 (10uM)	1648.41	21610.1	0.0762793		602.991	4831.47	0.124805		195.849	4802.43	0.0407813		457.456	2262.26	0.202212			0.0762793	0.124805	0.0407813	0.202212
Liraglutide+KT5720 (10uM)	7340.14	20787.9	0.353096		3134.98	6343.59	0.494197		670.87	5163.43	0.129927		2208.99	2796.13	0.790016			0.353096	0.494197	0.129927	0.790016
	Experiment #1				Experiment #2				Experiment #3				Experiment #4					Ratio Phospho-S6/Total S6
	Phospho-S6	Total S6	Ratio		Phospho-S6	Total S6	Ratio		Phospho-S6	Total S6	Ratio		Phospho-S6	Total S6	Ratio		Experiment	#1	#2	#3	#4
Vehicle	1969.2	7028.54	0.280173		622.991	4636.38	0.13437		1304.06	5745.46	0.226972		1963.52	6190.92	0.317162			0.280173	0.13437	0.226972	0.317162
Liraglutide	11204.1	7794.92	1.43736		6748.62	4077.93	1.65491		7896.52	5621.75	1.40464		8322.57	5849.84	1.4227			1.43736	1.65491	1.40464	1.4227
Vehicle+KT5720 (50uM)	105.364	3891.05	0.0270785		191.607	2994.03	0.0639963		204.569	3896.32	0.0525031		198.088	4445.18	0.0445625			0.0270785	0.0639963	0.0525031	0.0445625
Liraglutide+KT5720 (50uM)	51.536	3203.05	0.0160896		107.95	3120.28	0.0345963		87.981	2984.26	0.0294817		109.966	4052.27	0.0271368			0.0160896	0.0345963	0.0294817	0.0271368
	Experiment #1				Experiment #2				Experiment #3				Experiment #4					Ratio Phospho-CREB/Total CREB
	Phospho-CREB	Total CREB	Ratio		Phospho-CREB	Total CREB	Ratio		Phospho-CREB	Total CREB	Ratio		Phospho-CREB	Total CREB	Ratio		Experiment	#1	#2	#3	#4
Vehicle	386.574	684.752	0.564546		217.174	882.365	0.246127		549.982	876.532	0.627452							0.564546	0.246127	0.627452
Liraglutide	1782.6	625.457	2.85007		2863.56	623.457	4.59304		3963.36	964.542	4.10906							2.85007	4.59304	4.10906
Vehicle+KT5720 (10uM)	223.658	769.875	0.290512		187.111	785.159	0.23831		125.203	787.777	0.158932							0.290512	0.23831	0.158932
Liraglutide+KT5720 (10uM)	948.756	752.312	1.26112		923.561	701.231	1.31706		1001.59	965.233	1.03767							1.26112	1.31706	1.03767
	Experiment #1				Experiment #2				Experiment #3				Experiment #4					Ratio Phospho-CREB/Total CREB					Ratio Phospho-CREB/Total CREB			Ratio Phospho-CREB/Total CREB normalized to own average vehicle
	Phospho-CREB	Total CREB	Ratio		Phospho-CREB	Total CREB	Ratio		Phospho-CREB	Total CREB	Ratio		Phospho-CREB	Total CREB	Ratio		Experiment	#1	#2	#3	#4		Average Vehicle			Experiment	#1	#2	#3	#4
Vehicle	386.574	684.752	0.564546		217.174	882.365	0.246127		549.982	876.532	0.627452							0.564546	0.246127	0.627452			0.479375				#DIV/0!	#DIV/0!	#DIV/0!
Liraglutide	1782.6	625.457	2.85007		2863.56	623.457	4.59304		3963.36	964.542	4.10906							2.85007	4.59304	4.10906							#DIV/0!	#DIV/0!	#DIV/0!
Vehicle+KT5720 (50uM)	156.234	675.869	0.23116		87.254	859.253	0.101546		103.522	787.777	0.13141							0.23116	0.101546	0.13141			0.154706				#DIV/0!	#DIV/0!	#DIV/0!
Liraglutide+KT5720 (50uM)	132.145	632.145	0.209042		93.215	753.563	0.123699		91.695	965.233	0.0949978							0.209042	0.123699	0.0949978							#DIV/0!	#DIV/0!	#DIV/0!
Fig. 1-Fig. Supp. 1D	Experiment #1				Experiment #2				Experiment #3				Experiment #4					Ratio Phospho-S6/Total S6					Ratio Phospho-S6/Total S6			Ratio Phospho-S6/Total S6 normalized to own average vehicle
Densitometry	Phospho-S6	Total S6	Ratio		Phospho-S6	Total S6	Ratio		Phospho-S6	Total S6	Ratio		Phospho-S6	Total S6	Ratio		Experiment	#1	#2	#3	#4		Average Vehicle			Experiment	#1	#2	#3	#4
Vehicle	874.698	3340.5	0.261847		492.627	3434.3	0.143443		409.192	3976.26	0.102909		703.284	4215.43	0.166836			0.261847	0.143443	0.102909	0.166836		0.168759				#VALUE!	#VALUE!	#VALUE!	#VALUE!
Liraglutide	4912.18	3843.13	1.27817		5006.43	3969.5	1.26122		5040.31	3913.13	1.28805		5450.6	5235.55	1.04107			1.27817	1.26122	1.28805	1.04107						#VALUE!	#VALUE!	#VALUE!	#VALUE!
Vehicle+MK2206 (20uM)	289.92	3048.65	0.0950979		233.678	3041.38	0.076833		381.192	3282.13	0.116142		259.799	4683.08	0.0554761			0.0950979	0.076833	0.116142	0.0554761		0.0858871				0.563514	0.455283	0.688211	0.32873
Liraglutide+MK2206 (20uM)	1657.82	2639.36	0.628116		2293.89	2859.74	0.802133		1328.82	3612.96	0.367792		4114.6	5524.45	0.744798			0.628116	0.802133	0.367792	0.744798						3.72198	4.75314	2.1794	4.41339
	Experiment #1				Experiment #2				Experiment #3									Ratio Phospho-Akt/Total Akt					Ratio Phospho-Akt/Total Akt			Ratio Phospho-Akt/Total Akt normalized to own average vehicle
	Phospho-Akt	Total Akt	Ratio		Phospho-Akt	Total Akt	Ratio		Phospho-Akt	Total Akt	Ratio						Experiment	#1	#2	#3	#4		Average Vehicle			Experiment	#1	#2	#3	#4
Vehicle	63.74	430.562	0.148039		49.862	434.512	0.114754		91.92	397.625	0.231173							0.148039	0.114754	0.231173			0.164655				#VALUE!	#VALUE!	#VALUE!	#VALUE!
Liraglutide	112.872	786.235	0.14356		65.895	497.469	0.132461		43.023	393.253	0.109403							0.14356	0.132461	0.109403							#VALUE!	#VALUE!	#VALUE!	#VALUE!
Insulin	6103.26	654.875	9.31973		7123.23	501.231	14.2115		5542.36	400.156	13.8505							9.31973	14.2115	13.8505			12.4606				55.2252	84.2119	82.0728	0
Vehicle+MK2206 (20uM)	23.249	776.63	0.0299357		26.678	555.333	0.0480396		38.192	398.999	0.0957195							0.0299357	0.0480396	0.0957195							0.177388	0.284665	0.567198	0
Liraglutide+MK2206 (20uM)	57.825	548.23	0.105476		32.896	503.011	0.0653982		32.56	362.278	0.0898757							0.105476	0.0653982	0.0898757
Insulin+MK2206 (20uM)	45.248	489.998	0.0923432		54.231	498.257	0.108841		78.635	412.356	0.190697							0.0923432	0.108841	0.190697
