# Supplementary material for: Glucagon-like peptide-1 receptor activation stimulates PKA-mediated phosphorylation of Raptor and this contributes to the weight loss effect of liraglutide
Source: eLife journal article supplement (doi:10.7554/elife.80944), 2023-11-06
Supplement: supp [file eLife PKA Manuscript Rev 2 Figure 1-figure supplement 2 Raw Data.xlsx]

## Sheet: Sheet1
Fig. 1-fig. supp. 2A	Experiment #1				Experiment #2				Experiment #3										Ratio Phospho-S6/Total S6
Densitometry	Phospho-S6	Total S6	Ratio		Phospho-S6	Total S6	Ratio		Phospho-S6	Total S6	Ratio							Experiment	#1	#2	#3
Vehicle	1827.45	8987.88	0.203324		2482.74	11364.5	0.218465		1572.47	9952.23	0.158002								0.203324	0.218465	0.158002
100 pM	2547.89	7878.25	0.323408		3258.47	10529	0.309476		2845.52	8892.36	0.319996								0.323408	0.309476	0.319996
1 nM	8445.1	8523.67	0.990782		12584.2	11253.6	1.11824		9321.56	9457.55	0.985621								0.990782	1.11824	0.985621
10 nM	18456.7	8181.25	2.25597		23658.9	12864.2	1.83913		21456.9	8754.23	2.45103								2.25597	1.83913	2.45103
100 nM	21256.8	9235.47	2.30165		20789.7	11254	1.84732		22355.9	9856.31	2.26818								2.30165	1.84732	2.26818
1 uM	20345.5	9362.1	2.17317		22522.3	12854.6	1.75207		20356.8	9989.39	2.03784								2.17317	1.75207	2.03784
	Experiment #1				Experiment #2				Experiment #3										Ratio Phospho-CREB/Total CREB
Densitometry	Phospho-CREB	Total CREB	Ratio		Phospho-CREB	Total CREB	Ratio		Phospho-CREB	Total CREB	Ratio							Experiment	#1	#2	#3
Vehicle	8827.56	10842.8	0.814143		10823.5	15879.6	0.6816		4545.81	10123.5	0.449038								0.814143	0.6816	0.449038
100 pM	10895.2	11568.2	0.941823		11587.6	14578.2	0.79486		7852.42	11427.8	0.687134								0.941823	0.79486	0.687134
1 nM	14562.5	10563.3	1.3786		25744.1	13788.5	1.86707		23542.5	13563.8	1.73568								1.3786	1.86707	1.73568
10 nM	27547.9	9987.65	2.75819		40895.8	14874.7	2.74934		38956.8	12364.8	3.15061								2.75819	2.74934	3.15061
100 nM	28945.4	10248.5	2.82436		41563.2	15823.6	2.62667		41235.4	11587.7	3.55854								2.82436	2.62667	3.55854
1 uM	28456.5	9899.63	2.87451		42982.3	14235.9	3.01929		39874.6	13287.5	3.00092								2.87451	3.01929	3.00092
Fig. 1-fig. supp. 2B	Experiment #1				Experiment #2				Experiment #3				Experiment #4						Ratio Phospho-S6/Total S6
Densitometry	Phospho-S6	Total S6	Ratio		Phospho-S6	Total S6	Ratio		Phospho-S6	Total S6	Ratio		Phospho-S6	Total S6	Ratio			Experiment	#1	#2	#3	#4
Vehicle	2356.72	5632.12	0.418443		1007.89	4881.23	0.206483		1239.69	3878.89	0.319599		2007.84	5841.23	0.343736				0.418443	0.206483	0.319599	0.343736
30min	5332.65	6258.36	0.852084		4892.52	5003.22	0.977874		4918.56	4562.85	1.07796		5981.41	6235.75	0.959213				0.852084	0.977874	1.07796	0.959213
1h	11456.3	5864.22	1.95359		11789.5	5297.81	2.22535		9874.21	4123.56	2.39458		13547.9	6000.45	2.25781				1.95359	2.22535	2.39458	2.25781
2h	10235.7	6007.23	1.70389		12356.2	4983.56	2.47939		10182.6	3874.51	2.62811		11234.6	5923.82	1.89651				1.70389	2.47939	2.62811	1.89651
4h	1892.36	5967.77	0.317097		988.21	4789.64	0.206322		1189.46	4188.98	0.28395		1324.54	6234.51	0.212453				0.317097	0.206322	0.28395	0.212453
	Experiment #1				Experiment #2				Experiment #3				Experiment #4						Ratio Phospho-CREB/Total CREB
	Phospho-CREB	Total CREB	Ratio		Phospho-CREB	Total CREB	Ratio		Phospho-CREB	Total CREB	Ratio		Phospho-CREB	Total CREB	Ratio			Experiment	#1	#2	#3	#4
Vehicle	5534.24	10852.4	0.509957		7862.32	13256.2	0.593104		8282.71	11542.1	0.717608		9853.23	13540	0.727712				0.509957	0.593104	0.717608	0.727712
30min	9848.56	11584.2	0.85017		12235.6	14574.5	0.839527		13854.2	12358.8	1.121		11418.4	12698.9	0.899164				0.85017	0.839527	1.121	0.899164
1h	32423.6	11479	2.8246		41279	13369.3	3.0876		43271.5	14562.1	2.97151		39845.3	13215.5	3.01506				2.8246	3.0876	2.97151	3.01506
2h	39874.3	10563.2	3.77481		39823.5	12245.2	3.25218		37248.4	11845.9	3.14441		40240.1	13929.2	2.8889				3.77481	3.25218	3.14441	2.8889
4h	4001.23	11842.6	0.337869		4827.41	13578.5	0.355519		6002.32	12356.6	0.48576		7878.56	11470.3	0.686867				0.337869	0.355519	0.48576	0.686867
