# Supplementary material for: Glucagon-like peptide-1 receptor activation stimulates PKA-mediated phosphorylation of Raptor and this contributes to the weight loss effect of liraglutide
Source: eLife journal article supplement (doi:10.7554/elife.80944), 2023-11-06
Supplement: supp [file eLife PKA Manuscript Rev 2 Figure 2 Raw Data.xlsx]

## Sheet: Figure 1
FIGURE 2A		Experiment #1				Experiment #2				Experiment #3				Experiment #4					Ratio Phospho-PKA/Myc					Ratio Phospho-PKA/Myc			Ratio Phospho-PKA/Myc normalized to own average vehicle
Densitometry		Phospho-PKA	Myc	Ratio		Phospho-PKA	Myc	Ratio		Phospho-PKA	Myc	Ratio		Phospho-PKA	Myc	Ratio		Experiment	#1	#2	#3	#4		Average Vehicle			Experiment	#1	#2	#3	#4
Wild-type	Vehicle	676.113	7066.69	0.0956761		367.335	7556.2	0.0486137		485.577	8540.64	0.0568549		2285.18	7260.12	0.314758			0.0956761	0.0486137	0.0568549	0.314758		0.128976				0.741814	0.376922	0.440818	2.44045
	Liraglutide	6688.74	6749.64	0.990977		3887.91	6122.37	0.635034		9757.4	8542.17	1.14226		9250.4	5937.76	1.55789			0.990977	0.635034	1.14226	1.55789						7.68344	4.92367	8.85641	12.079
	Forskolin	6869.91	6499.1	1.05706		5559.91	9179.44	0.605692		6892.93	10860.8	0.634664		9829.64	7447.12	1.31992			1.05706	0.605692	0.634664	1.31992						8.19577	4.69617	4.9208	10.2339
	Insulin	890.82	7607.05	0.117104		278.263	6208.95	0.0448164		584.284	8494.64	0.0687827							0.117104	0.0448164	0.0687827							0.907957	0.347479	0.533299
	Vehicle+H89	167.607	6258.69	0.0267799		417.385	6047.59	0.0690168											0.0267799	0.0690168				0.0478983				0.559099	1.4409
	Liraglutide+H89	173.021	5537.15	0.0312473		303.314	4713.18	0.0643545											0.0312473	0.0643545								0.652367	1.34356
	Forskolin+H89	185.435	6394.4	0.0289996		467.092	9392.97	0.0497278											0.0289996	0.0497278								0.605441	1.0382
		Phospho-PKA	Myc	Ratio		Phospho-PKA	Myc	Ratio		Phospho-PKA	Myc	Ratio		Phospho-PKA	Myc	Ratio		Experiment	#1	#2	#3	#4		Average Vehicle			Experiment	#1	#2	#3	#4
Ser791Ala Mutant	Vehicle	34.121	6090.93	0.00560193		250.192	10902.4	0.0229483		114.616	8210.3	0.0139601		59.536	7637.54	0.00779518			0.00560193	0.0229483	0.0139601	0.00779518		0.0125764				0.445434	1.82471	1.11002	0.619828
	Liraglutide	146.95	4459.28	0.0329538		974.991	9609.66	0.101459		152.021	6701.69	0.022684		256.243	8740.37	0.0293172			0.0329538	0.101459	0.022684	0.0293172						2.6203	8.06748	1.8037	2.33113
	Forskolin	22.121	7580.47	0.00291816		970.749	13661	0.07106		272.92	5123.69	0.0532663		275.607	8064.37	0.0341759			0.00291816	0.07106	0.0532663	0.0341759						0.232035	5.65029	4.23543	2.71747
FIGURE 2B		Experiment #1				Experiment #2				Experiment #3									Ratio Phospho-PKA/Myc								Ratio Phospho-PKA/Myc normalized to own average vehicle
Densitometry		Phospho-PKA	Myc	Ratio		Phospho-PKA	Myc	Ratio		Phospho-PKA	Myc	Ratio						Experiment	#1	#2	#3			Average Vehicle			Experiment	#1	#2	#3
	Vehicle	1680.36	16854.7	0.0996971		3894.12	20102.3	0.193716		2566.35	18599.3	0.137981							0.0996971	0.193716	0.137981			0.143798				0.693314	1.34714	0.959549
	Liraglutide	10436.2	16336.6	0.638823		19932.7	17098.5	1.16576		15857.1	21461.5	0.738863							0.638823	1.16576	0.738863							4.44251	8.10694	5.1382
	Forskolin	9698.85	16196.5	0.598823		16817.5	14860.4	1.1317		17923.3	22710.6	0.789205							0.598823	1.1317	0.789205							4.16434	7.87009	5.48829
	Insulin	1800.78	15290.7	0.11777		889.406	8026.7	0.110806		3043.85	18208	0.167171							0.11777	0.110806	0.167171							0.818993	0.770567	1.16254
	Vehicle+MK2206	2560.61	10888.7	0.235161		1724.2	10894.4	0.158266		3176.09	20225.8	0.157031							0.235161	0.158266	0.157031			0.183486				1.28163	0.86255	0.855822
	Liraglutide+MK2206	11870.3	10759.4	1.10324		11416.5	9585.92	1.19097		22493.2	19136.3	1.17542							1.10324	1.19097	1.17542							6.01268	6.49079	6.40605
	Forskolin+MK2206	12603.1	13067.1	0.96449		15573.5	15482.1	1.00591		15759.4	20923.8	0.753178							0.96449	1.00591	0.753178							5.25648	5.48219	4.10483
	Insulin+MK2206	4730.85	17978.8	0.263135		2117.57	15697.4	0.134899		3592.68	19924.6	0.180313							0.263135	0.134899	0.180313							1.43409	0.735201	0.982709
FIGURE 2C		Experiment #1				Experiment #2				Experiment #3									Ratio Phospho-PKA/Myc					Ratio Phospho-PKA/Myc			Ratio Phospho-PKA/Myc normalized to own average vehicle
Densitometry		Phospho-PKA	Myc	Ratio		Phospho-PKA	Myc	Ratio		Phospho-PKA	Myc	Ratio						Experiment	#1	#2	#3			Average Vehicle			Experiment	#1	#2	#3
Wild-type	Vehicle	2179.68	10870.8	0.200507		76.849	1930.65	0.0398048		809.113	7078.78	0.114301							0.200507	0.0398048	0.114301			0.118204				1.69628	0.336745	0.966979
	Liraglutide	7031.73	13443.7	0.52305		774.548	2599.6	0.297949		3301.83	6660.9	0.495703							0.52305	0.297949	0.495703							4.42496	2.52063	4.19361
	Forskolin	11550.7	12010.6	0.961704		2140.55	4372.26	0.489575		6951.42	10632.9	0.653764							0.961704	0.489575	0.653764							8.13594	4.14177	5.53079
	Insulin	2814.54	12224.6	0.230235		209.87	2418.01	0.0867944		1082.72	7818.49	0.138482							0.230235	0.0867944	0.138482							1.94777	0.734274	1.17155
		Phospho-PKA	Myc	Ratio		Phospho-PKA	Myc	Ratio		Phospho-PKA	Myc	Ratio						Experiment	#1	#2	#3			Average Vehicle			Experiment	#1	#2	#3
Ser791Ala Mutant	Vehicle	1428.05	9958.23	0.143404		243.991	2773.01	0.0879877		619.941	7635.61	0.0811908							0.143404	0.0879877	0.0811908			0.104194				1.37632	0.844458	0.779225
	Liraglutide	1047.84	11631.5	0.0900862		174.213	993.113	0.175421		1709.1	11512.9	0.148452							0.0900862	0.175421	0.148452							0.864598	1.6836	1.42476
	Forskolin	1700.42	11360.8	0.149674		203.749	2096.48	0.0971864		1597.52	8079.49	0.197725							0.149674	0.0971864	0.197725							1.43649	0.932742	1.89766
	Insulin	845.912	13330.6	0.0634563		65.607	1559.48	0.0420699		509.456	2724.2	0.187011							0.0634563	0.0420699	0.187011							0.609019	0.403764	1.79483
