# Supplementary material for: Glucagon-like peptide-1 receptor activation stimulates PKA-mediated phosphorylation of Raptor and this contributes to the weight loss effect of liraglutide
Source: eLife journal article supplement (doi:10.7554/elife.80944), 2023-11-06
Supplement: supp [file eLife PKA Manuscript Rev 2 Figure 3 Raw Data.xlsx]

## Sheet: Figure 3A-3H
	FIGURE 3A																FIGURE 3B																FIGURE 3C			FIGURE 3D		FIGURE 3E			FIGURE 3F		FIGURE 3G			FIGURE 3H
WT Saline	Body Weight (g)																Change in Body Weight (g)																Total Mass (g)			Change in Total Mass (g)		Fat Mass (g)			Change in Fat Mass (g)		Lean Mass (g)			Change in Lean Mass (g)
Day	0	1	2	3	4	5	6	7	8	9	10	11	12	13	14		0	1	2	3	4	5	6	7	8	9	10	11	12	13	14		Day 0	Day 14				Day 0	Day 14				Day 0	Day 14
WT #1	27.7	27.9	28.2	29	28.4	28.6	28.5	29.3	28.9	28.4	28.2	28.2	29	29.2	28.6		0	0.2	0.5	1.3	0.7	0.9	0.8	1.6	1.2	0.7	0.5	0.5	1.3	1.5	0.9		27.7	28.6		0.9		5.486	6.327		0.841		15.629	15.608		-0.021
WT #2	25.9	26	25.9	26.1	25.9	25.8	25.8	26.2	26	25.8	26.5	26.3	26	26.3	26.3		0	0.1	0	0.2	0	-0.1	-0.1	0.3	0.1	-0.1	0.6	0.4	0.1	0.4	0.4		25.9	26.3		0.4		3.314	4.476		1.162		16.001	15.526		-0.475
WT #3	30.7	30.2	30.1	30.3	30.1	30.7	30.7	31.1	30.7	30.6	30.9	30.8	31.2	30.8	31.1		0	-0.5	-0.6	-0.4	-0.6	0	0	0.4	0	-0.1	0.2	0.1	0.5	0.1	0.4		30.7	31.1		0.4		5.686	6.929		1.243		17.428	16.894		-0.534
WT #4	27.9	28	28.4	28	28.4	27.9	28.4	28	28.5	28.3	28.2	28.2	28.4	28.1	28.3		0	0.1	0.5	0.1	0.5	0	0.5	0.1	0.6	0.4	0.3	0.3	0.5	0.2	0.4		27.9	28.3		0.4		4.256	4.516		0.26		17.07	16.644		-0.426
WT #5	24	23.7	24.6	25	24.3	24.8	25	24.9	24.8	25	25	25	25.2	24.9	24.9		0	-0.3	0.6	1	0.3	0.8	1	0.9	0.8	1	1	1	1.2	0.9	0.9		24	24.9		0.9		4.121	4.595		0.474		14.478	14.421		-0.057
WT #6	25.7	25.8	26	26	25.8	25.1	25.6	24.9	25.4	25.8	25.5	25.5	25.1	25.7	25.9		0	0.1	0.3	0.3	0.1	-0.6	-0.1	-0.8	-0.3	0.1	-0.2	-0.2	-0.6	0	0.2		25.7	25.9		0.2		2.27	2.597		0.327		17.332	17.496		0.164
WT #7	25.1	25.2	25.4	25.3	25.5	25.4	25.2	24.8	24.7	25.7	25.5	25.1	24.8	25.1	25.5		0	0.1	0.3	0.2	0.4	0.3	0.1	-0.3	-0.4	0.6	0.4	0	-0.3	0	0.4		25.1	25.5		0.4		3.794	4.773		0.979		14.892	14.544		-0.348
WT #8	29.2	29.6	29.5	29.9	30.1	30.6	29.9	30.4	30.6	31	31.2	31.7	31.5	31.7	31.6		0	0.4	0.3	0.7	0.9	1.4	0.7	1.2	1.4	1.8	2	2.5	2.3	2.5	2.4		29.2	31.6		2.4		3.752	5.169		1.417		18.208	19.25		1.042
WT #9	29.3	29.4	30	30.6	30	31.1	31	31.9	31.7	32.3	32.7	33.3	33.2	33.7	33.8		0	0.1	0.7	1.3	0.7	1.8	1.7	2.6	2.4	3	3.4	4	3.9	4.4	4.5		29.3	33.8		4.5		4.508	7.056		2.548		17.565	18.732		1.167
WT #10	25.3	25.4	25.2	25.6	25.3	24.9	25.5	25.2	25.5	25.6	26	26.2	26.2	26.2	26.5		0	0.1	-0.1	0.3	0	-0.4	0.2	-0.1	0.2	0.3	0.7	0.9	0.9	0.9	1.2		25.3	26.5		1.2
WT #11	25.1	24.8	24.8	25.3	24.6	24.3	25.2	24.7	24.7	24.5	24.2	24.9	24.4	24.8	24.6		0	-0.3	-0.3	0.2	-0.5	-0.8	0.1	-0.4	-0.4	-0.6	-0.9	-0.2	-0.7	-0.3	-0.5		25.1	24.6		-0.5
WT #12	27.75	27.5	28	27.8	28	27.8	28.2	28.3	28.3	29	29.5	29.5	29.8	29.5	29.6		0	-0.25	0.25	0.05	0.25	0.05	0.45	0.55	0.55	1.25	1.75	1.75	2.05	1.75	1.85		27.75	29.6		1.85
WT #13	26.6	26.6	26.9	27.5	27.4	27.3	27	27.4	26.9	27.7	27.1	27.5	27	28	28		0	0	0.3	0.9	0.8	0.7	0.4	0.8	0.3	1.1	0.5	0.9	0.4	1.4	1.4		26.6	28		1.4
MEAN	26.9423	26.9308	27.1538	27.4154	27.2154	27.2538	27.3846	27.4692	27.4385	27.6692	27.7308	27.8615	27.8308	28	28.0538		0	-0.0115385	0.211538	0.473077	0.273077	0.311538	0.442308	0.526923	0.496154	0.726923	0.788462	0.919231	0.888462	1.05769	1.11154		26.9423	28.0538		1.11154		4.13189	5.15978		1.02789		16.5114	16.5683		0.0568889
SEM	0.553597	0.559806	0.552223	0.563056	0.58582	0.674025	0.609523	0.718294	0.693517	0.69866	0.738709	0.765233	0.80562	0.790164	0.785087		0	0.0693731	0.102868	0.144184	0.130165	0.213949	0.142533	0.253982	0.223783	0.261076	0.299901	0.335293	0.357975	0.36037	0.351925		0.553597	0.785087		0.351925		0.349601	0.471503		0.234266		0.43478	0.572067		0.212866
WT Liraglutide	Body Weight (g)																Body Weight Change (g)																Total Mass (g)			Total Mass Change (g)		Fat Mass (g)			Change in Fat Mass (g)		Lean Mass (g)			Change in Lean Mass (g)
Day	0	1	2	3	4	5	6	7	8	9	10	11	12	13	14		0	1	2	3	4	5	6	7	8	9	10	11	12	13	14		Day 0	Day 14		Day 14		Day 0	Day 14				Day 0	Day 14
WT #14	27.1	25.4	25.1	25.1	25.1	24.8	24.8	24.7	24.8	24.3	25.4	25	24.8	24.8	24.4		0	-1.7	-2	-2	-2	-2.3	-2.3	-2.4	-2.3	-2.8	-1.7	-2.1	-2.3	-2.3	-2.7		27.1	24.4		-2.7		4.635	3.662		-0.973		15.73	14.67		-1.06
WT #15	25.8	24.4	24.2	24.1	24.3	23.8	23.9	23.9	23.9	23.4	24	23.9	23.8	23.7	23.7		0	-1.4	-1.6	-1.7	-1.5	-2	-1.9	-1.9	-1.9	-2.4	-1.8	-1.9	-2	-2.1	-2.1		25.8	23.7		-2.1		4.226	3.175		-1.051		15.584	14.601		-0.983
WT #16	27.3	24.7	24.8	24.8	25	25.3	24.9	25.1	25.2	24.6	24.8	25.1	25.1	25.4	25.3		0	-2.6	-2.5	-2.5	-2.3	-2	-2.4	-2.2	-2.1	-2.7	-2.5	-2.2	-2.2	-1.9	-2		27.3	25.3		-2		4.315	3.763		-0.552		16.235	15.014		-1.221
WT #17	26.7	25.2	25.1	25	25.1	25.3	25.2	25.1	25.2	25.2	25.5	25.4	26	25.3	25.4		0	-1.5	-1.6	-1.7	-1.6	-1.4	-1.5	-1.6	-1.5	-1.5	-1.2	-1.3	-0.7	-1.4	-1.3		26.7	25.4		-1.3		4.618	4.365		-0.253		15.793	14.684		-1.109
WT #18	31.8	29.6	29.3	29.2	29.2	28.5	28.5	28.2	28.4	28	28.2	28.3	27.9	28	28.4		0	-2.2	-2.5	-2.6	-2.6	-3.3	-3.3	-3.6	-3.4	-3.8	-3.6	-3.5	-3.9	-3.8	-3.4		31.8	28.4		-3.4		7.118	5.099		-2.019		17.767	15.851		-1.916
WT #19	26.1	24.5	24.4	24.8	24.5	24.3	24.8	24.4	24.6	24.9	24.3	24.5	25.2	24.5	24.8		0	-1.6	-1.7	-1.3	-1.6	-1.8	-1.3	-1.7	-1.5	-1.2	-1.8	-1.6	-0.9	-1.6	-1.3		26.1	24.8		-1.3		4.239	3.397		-0.842		15.568	15.231		-0.337
WT #20	26.4	24.4	24.8	25	24.5	24.8	24.1	24.7	24.2	25.3	25	24.8	24.3	24.4	25		0	-2	-1.6	-1.4	-1.9	-1.6	-2.3	-1.7	-2.2	-1.1	-1.4	-1.6	-2.1	-2	-1.4		26.4	25		-1.4		4.702	3.302		-1.4		15.767	15.028		-0.739
WT #21	29	27	26.3	26.3	26.1	25.8	25.7	25.5	25.4	26	26.5	26.9	25.9	25.8	26.5		0	-2	-2.7	-2.7	-2.9	-3.2	-3.3	-3.5	-3.6	-3	-2.5	-2.1	-3.1	-3.2	-2.5		29	26.5		-2.5		4.697	3.461		-1.236		16.89	15.964		-0.926
WT #22	26.5	24.7	25	25.2	24.7	25	24.4	24.3	24.8	24.6	23.9	24.9	24.6	25	25.3		0	-1.8	-1.5	-1.3	-1.8	-1.5	-2.1	-2.2	-1.7	-1.9	-2.6	-1.6	-1.9	-1.5	-1.2		26.5	25.3		-1.2		7.802	6.092		-1.71		16.676	15.64		-1.036
WT #23	27.7	25.1	25	25	25	25.3	25.3	25.6	24.9	25.4	25.3	25.5	25.2	25.1	25.5		0	-2.6	-2.7	-2.7	-2.7	-2.4	-2.4	-2.1	-2.8	-2.3	-2.4	-2.2	-2.5	-2.6	-2.2		27.7	25.5		-2.2		6.153	5.059		-1.094		17.069	17.075		0.006
WT #24	31.3	29	29	29.1	29.1	28.5	28.5	28.5	28.3	28.2	28.5	28.3	28.2	28.5	28.1		0	-2.3	-2.3	-2.2	-2.2	-2.8	-2.8	-2.8	-3	-3.1	-2.8	-3	-3.1	-2.8	-3.2		31.3	28.1		-3.2		2.9	2.581		-0.319		17.008	16.247		-0.761
WT #25	30.1	27.9	27.8	28.1	28.1	28.1	28.1	27.7	27.5	27.5	28	27.8	27.9	28.5	28.2		0	-2.2	-2.3	-2	-2	-2	-2	-2.4	-2.6	-2.6	-2.1	-2.3	-2.2	-1.6	-1.9		30.1	28.2		-1.9		3.788	3.159		-0.629		16.534	16.011		-0.523
WT #26	25	22.8	22.7	23.1	23	23.4	23.5	23.2	23.3	23.4	23	23	23.4	23.5	23.8		0	-2.2	-2.3	-1.9	-2	-1.6	-1.5	-1.8	-1.7	-1.6	-2	-2	-1.6	-1.5	-1.2		25	23.8		-1.2
WT #27	24.95	23	23.2	22.9	23.2	23.2	23.5	23.2	22.9	23.5	23.3	23.2	23.5	23.5	23.8		0	-1.95	-1.75	-2.05	-1.75	-1.75	-1.45	-1.75	-2.05	-1.45	-1.65	-1.75	-1.45	-1.45	-1.15		24.95	23.8		-1.15
MEAN	27.5536	25.55	25.4786	25.55	25.4929	25.4357	25.3714	25.2929	25.2429	25.3071	25.4071	25.4714	25.4143	25.4286	25.5857		0	-2.00357	-2.075	-2.00357	-2.06071	-2.11786	-2.18214	-2.26071	-2.31071	-2.24643	-2.14643	-2.08214	-2.13929	-2.125	-1.96786		27.5536	25.5857		-1.96786		4.93275	3.92625		-1.0065		16.3851	15.5013		-0.88375
SEM	0.586442	0.552392	0.526462	0.526626	0.525238	0.469815	0.467449	0.456511	0.454007	0.429984	0.4778	0.464619	0.429011	0.460939	0.434862		0	0.100338	0.118455	0.131816	0.115333	0.163378	0.17174	0.171626	0.181582	0.216266	0.169393	0.155274	0.229199	0.196868	0.203379		0.586442	0.434862		0.203379		0.404505	0.294995		0.154599		0.206354	0.219368		0.139062
S791A Raptor Saline	Body Weight (g)																Body Weight Change (g)																Total Mass (g)			Total Mass Change (g)		Fat Mass (g)			Change in Fat Mass (g)		Lean Mass (g)			Change in Lean Mass (g)
Day	0	1	2	3	4	5	6	7	8	9	10	11	12	13	14		0	1	2	3	4	5	6	7	8	9	10	11	12	13	14		Day 0	Day 14		Day 14		Day 0	Day 14				Day 0	Day 14
RapKI #1	25.6	25.5	25.3	25.6	25.5	26	26.3	26.1	25.8	26.4	26.6	26.5	26.2	25.6	25.7		0	-0.1	-0.3	0	-0.1	0.4	0.7	0.5	0.2	0.8	1	0.9	0.6	0	0.1		25.6	25.7		0.1		3.894	4.936		1.042		14.953	14.927		-0.026
RapKI #2	32.9	32.7	32.6	33.2	32.6	32.8	32.8	32.8	33	32.4	32.8	32.7	32.7	32.2	32.8		0	-0.2	-0.3	0.3	-0.3	-0.1	-0.1	-0.1	0.1	-0.5	-0.1	-0.2	-0.2	-0.7	-0.1		32.9	32.8		-0.1		4.823	6.389		1.566		19.305	18.694		-0.611
RapKI #3	28.5	28.4	29.7	29.3	29.7	29.8	30	29.3	30.1	30.7	30.5	30.4	31.4	31.7	32.5		0	-0.1	1.2	0.8	1.2	1.3	1.5	0.8	1.6	2.2	2	1.9	2.9	3.2	4		28.5	32.5		4		5.866	7.172		1.306		16.775	17.335		0.56
RapKI #4	27.8	28	28.1	28.6	28.4	28.1	28.3	28.3	28.7	28.9	29	29.7	29	29.5	29.5		0	0.2	0.3	0.8	0.6	0.3	0.5	0.5	0.9	1.1	1.2	1.9	1.2	1.7	1.7		27.8	29.5		1.7		1.956	2.848		0.892		18.961	19.266		0.305
RapKI #5	22.8	23.4	22.9	23.6	23.7	23.4	23.5	24	23.9	23.8	24	23.9	23.7	23.1	23		0	0.6	0.1	0.8	0.9	0.6	0.7	1.2	1.1	1	1.2	1.1	0.9	0.3	0.2		22.8	23		0.2		2.699	2.394		-0.305		15.02	15.215		0.195
RapKI #6	28.4	28.1	28.3	28.4	28.4	29.3	29.3	29.1	29.4	29.6	29.9	30.5	30.2	31.3	31.3		0	-0.3	-0.1	0	0	0.9	0.9	0.7	1	1.2	1.5	2.1	1.8	2.9	2.9		28.4	31.3		2.9		5.864	7.99		2.126		16.082	16.551		0.469
RapKI #7	32.1	32.3	32.5	32.7	32.8	33.3	33.2	33.3	33.3	33.7	34	34.2	34.2	34.5	35.4		0	0.2	0.4	0.6	0.7	1.2	1.1	1.2	1.2	1.6	1.9	2.1	2.1	2.4	3.3		32.1	35.4		3.3		10.051	11.462		1.411		15.622	16.545		0.923
RapKI #8	27	26.6	27.2	27.3	27.5	27.8	28.2	27.9	27.7	28.1	28.5	28.5	28.7	28	29.2		0	-0.4	0.2	0.3	0.5	0.8	1.2	0.9	0.7	1.1	1.5	1.5	1.7	1	2.2		27	29.2		2.2		4.868	6.191		1.323		15.477	16.368		0.891
RapKI #9	25.8	25.8	25.7	26.6	26.1	26.9	26.9	26.8	26.7	26.6	27.1	27.2	27.3	29.1	28.5		0	0	-0.1	0.8	0.3	1.1	1.1	1	0.9	0.8	1.3	1.4	1.5	3.3	2.7		25.8	28.5		2.7		4.067	5.729		1.662		15.2	16.077		0.877
RapKI #10	27.95	28	27.7	27.9	29.5	28.8	28.6	29.1	28.7	28.7	29.4	29.9	30.9	30	30.2		0	0.05	-0.25	-0.05	1.55	0.85	0.65	1.15	0.75	0.75	1.45	1.95	2.95	2.05	2.25		27.95	30.2		2.25
RapKI #11	27.2	27.2	27.3	27.4	27.4	27.2	27.2	27.4	27.5	27.4	28	28.1	28.7	28	28.8		0	0	0.1	0.2	0.2	0	0	0.2	0.3	0.2	0.8	0.9	1.5	0.8	1.6		27.2	28.8		1.6
RapKI #12	29.5	29.5	29.7	30.1	29.7	30	29	30.3	29.9	30	30.1	30.6	29.9	31	31.3		0	0	0.2	0.6	0.2	0.5	-0.5	0.8	0.4	0.5	0.6	1.1	0.4	1.5	1.8		29.5	31.3		1.8
RapKI #13	27.35	27.1	27.3	27.5	27.2	27.4	27.9	28.4	28.6	28.1	28.5	28.6	29	28.3	28.8		0	-0.25	-0.05	0.15	-0.15	0.05	0.55	1.05	1.25	0.75	1.15	1.25	1.65	0.95	1.45		27.35	28.8		1.45
MEAN	27.9154	27.8923	28.0231	28.3231	28.3462	28.5231	28.5538	28.6769	28.7154	28.8	29.1077	29.2923	29.3769	29.4077	29.7692		0	-0.0230769	0.107692	0.407692	0.430769	0.607692	0.638462	0.761538	0.8	0.884615	1.19231	1.37692	1.46154	1.49231	1.85385		27.9154	29.7692		1.85385		4.89867	6.12344		1.22478		16.3772	16.7753		0.398111
SEM	0.729998	0.709411	0.749286	0.727584	0.718761	0.736255	0.70834	0.699098	0.722518	0.721555	0.714274	0.735585	0.757455	0.820527	0.875184		0	0.0719721	0.110484	0.0935151	0.152599	0.128707	0.156806	0.110238	0.124679	0.179599	0.152631	0.179887	0.252116	0.347281	0.345922		0.729998	0.875184		0.345922		0.77835	0.908002		0.225311		0.554405	0.48313		0.167793
S791A Raptor Liraglutide	Body Weight (g)																Body Weight Change (g)																Total Mass (g)			Total Mass Change (g)		Fat Mass (g)			Change in Fat Mass (g)		Lean Mass (g)			Change in Lean Mass (g)
Day	0	1	2	3	4	5	6	7	8	9	10	11	12	13	14		0	1	2	3	4	5	6	7	8	9	10	11	12	13	14		Day 0	Day 14		Day 14		Day 0	Day 14				Day 0	Day 14
RapKI #14	27.1	25.1	25.8	25.9	25.9	25.7	26.1	26.7	26.7	26.5	27	27	26.4	26.2	26		0	-2	-1.3	-1.2	-1.2	-1.4	-1	-0.4	-0.4	-0.6	-0.1	-0.1	-0.7	-0.9	-1.1		27.1	26		-1.1		2.792	3.208		0.416		17.259	16.583		-0.676
RapKI #15	28.2	26.7	26.8	27.1	26.6	26.8	26.8	27	27.2	26.7	27.2	27.5	27	26.4	26.4		0	-1.5	-1.4	-1.1	-1.6	-1.4	-1.4	-1.2	-1	-1.5	-1	-0.7	-1.2	-1.8	-1.8		28.2	26.4		-1.8		5.373	4.882		-0.491		15.643	15.669		0.026
RapKI #16	25	23.7	23.5	23.6	24	23.8	23.3	23.4	23	23.5	23.4	23.6	23.9	23.8	23.8		0	-1.3	-1.5	-1.4	-1	-1.2	-1.7	-1.6	-2	-1.5	-1.6	-1.4	-1.1	-1.2	-1.2		25	23.8		-1.2		4.517	3.252		-1.265		14.912	14.58		-0.332
RapKI #17	28.2	26.8	27.3	28.7	28	27.5	27.3	27.3	27	27.9	27.8	27.5	27	27.6	28.3		0	-1.4	-0.9	0.5	-0.2	-0.7	-0.9	-0.9	-1.2	-0.3	-0.4	-0.7	-1.2	-0.6	0.1		28.2	28.3		0.1		2.613	3.227		0.614		18.961	17.368		-1.593
RapKI #18	23.4	22.2	22.5	23.4	23.4	23.4	22.8	23.2	23.6	23.7	23.7	23.5	23.5	23	23.5		0	-1.2	-0.9	0	0	0	-0.6	-0.2	0.2	0.3	0.3	0.1	0.1	-0.4	0.1		23.4	23.5		0.1		3.725	3.504		-0.221		14.409	13.977		-0.432
RapKI #19	28.2	26.5	26.4	26.6	26.8	26.8	26.9	26.9	26.7	26.7	26.8	27.1	26.9	27.1	27.1		0	-1.7	-1.8	-1.6	-1.4	-1.4	-1.3	-1.3	-1.5	-1.5	-1.4	-1.1	-1.3	-1.1	-1.1		28.2	27.1		-1.1		6.032	5.865		-0.167		15.848	15.353		-0.495
RapKI #20	27	25.2	25.7	25.8	25.6	25.6	25.8	25.6	25.8	25.7	26.3	26	25.9	25.8	25.9		0	-1.8	-1.3	-1.2	-1.4	-1.4	-1.2	-1.4	-1.2	-1.3	-0.7	-1	-1.1	-1.2	-1.1		27	25.9		-1.1		2.521	2.51		-0.011		18.412	17.135		-1.277
RapKI #21	28.9	27	27.5	27.7	27.4	28	27.5	27.7	27.7	27.7	27.7	27.7	27.9	28	28.3		0	-1.9	-1.4	-1.2	-1.5	-0.9	-1.4	-1.2	-1.2	-1.2	-1.2	-1.2	-1	-0.9	-0.6		28.9	28.3		-0.6		2.182	2.449		0.267		19.772	18.874		-0.898
RapKI #22	29.6	27.7	27.2	27.4	27.3	27.6	27.2	27.3	27.4	27.6	27.3	27.5	27.8	28.1	28.6		0	-1.9	-2.4	-2.2	-2.3	-2	-2.4	-2.3	-2.2	-2	-2.3	-2.1	-1.8	-1.5	-1		29.6	28.6		-1		6.378	5.978		-0.4		16.482	16.242		-0.24
RapKI #23	24.8	22.7	22.7	23.4	23	23.8	23.8	23.8	24.1	23.6	23.6	23.8	24.1	24.2	24.3		0	-2.1	-2.1	-1.4	-1.8	-1	-1	-1	-0.7	-1.2	-1.2	-1	-0.7	-0.6	-0.5		24.8	24.3		-0.5		3.905	3.647		-0.258		14.811	14.773		-0.038
RapKI #24	30.2	28	28.2	28.7	28	28.3	28	27.7	27.9	27.8	27.6	27.6	28	28	28.6		0	-2.2	-2	-1.5	-2.2	-1.9	-2.2	-2.5	-2.3	-2.4	-2.6	-2.6	-2.2	-2.2	-1.6		30.2	28.6		-1.6
RapKI #25	27.55	25.1	25.7	25.8	25.9	25.9	25.5	25	25.4	25.1	24.7	25.2	25.3	25.3	26.1		0	-2.45	-1.85	-1.75	-1.65	-1.65	-2.05	-2.55	-2.15	-2.45	-2.85	-2.35	-2.25	-2.25	-1.45		27.55	26.1		-1.45
RapKI #26	27.2	25.2	25.5	26	26	26.1	25.8	25.5	25.1	25	26.2	25.5	25.7	25.2	25.8		0	-2	-1.7	-1.2	-1.2	-1.1	-1.4	-1.7	-2.1	-2.2	-1	-1.7	-1.5	-2	-1.4		27.2	25.8		-1.4
RapKI #27	28.95	27	27	27.5	27.5	27.9	27.8	27.8	27.1	27	27.6	28	27.8	27.3	27.9		0	-1.95	-1.95	-1.45	-1.45	-1.05	-1.15	-1.15	-1.85	-1.95	-1.35	-0.95	-1.15	-1.65	-1.05		28.95	27.9		-1.05
MEAN	27.4769	25.6769	25.8462	26.2846	26.1154	26.2692	26.0385	26.0154	26	26	26.1462	26.1923	26.2154	26.1385	26.5077		0	-1.8	-1.63077	-1.19231	-1.36154	-1.20769	-1.43846	-1.46154	-1.47692	-1.47692	-1.33077	-1.28462	-1.26154	-1.33846	-0.969231		27.4769	26.5077		-0.969231		4.13844	3.92378		-0.214667		16.5833	15.9968		-0.586556
SEM	0.554227	0.516541	0.515977	0.51613	0.471338	0.471411	0.485368	0.47405	0.454183	0.463266	0.469399	0.471422	0.446905	0.48059	0.504907		0	0.102062	0.124877	0.196675	0.184422	0.145537	0.14535	0.186496	0.201407	0.219966	0.241691	0.206185	0.170139	0.171826	0.164914		0.554227	0.504907		0.164914		0.517269	0.445186		0.173936		0.658938	0.522024		0.18559

## Sheet: Figure 3I-3J
		Absolute Food Intake (g)					Daily Food Intake (g)							Absolute Food Intake (g)					Daily Food Intake (g)							Absolute Food Intake (g)					Daily Food Intake (g)							Absolute Food Intake (g)					Daily Food Intake (g)
		Group 1		Group 2			Group 1		Group 2					Group 1		Group 2			Group 1		Group 2					Group 1		Group 2			Group 1		Group 2					Group 1		Group 2			Group 1		Group 2
Group 1	Group 2	WT Saline	WT Saline	WT Saline	WT Saline		WT Saline	WT Saline	WT Saline	WT Saline				WT Liraglutide	WT Liraglutide	WT Liraglutide	WT Liraglutide		WT Liraglutide	WT Liraglutide	WT Liraglutide	WT Liraglutide				S791A Saline	S791A Saline	S791A Saline	S791A Saline		S791A	S791A	S791A	S791A				S791A Liraglutide	S791A Liraglutide	S791A Liraglutide	S791A Liraglutide		S791A Liraglutide	S791A Liraglutide	S791A Liraglutide	S791A Liraglutide
DateTime	DateTime	FoodInA_M_1	FoodInA_M_8	FoodInA_M_6	FoodInA_M_7		FoodInA_M_1	FoodInA_M_8	FoodInA_M_6	FoodInA_M_7	MEAN	SEM		FoodInA_M_3	FoodInA_M_5	FoodInA_M_2	FoodInA_M_3		FoodInA_M_3	FoodInA_M_5	FoodInA_M_2	FoodInA_M_3	MEAN	SEM		FoodInA_M_4	FoodInA_M_7	FoodInA_M_1	FoodInA_M_4		FoodInA_M_4	FoodInA_M_7	FoodInA_M_1	FoodInA_M_4	MEAN	SEM		FoodInA_M_2	FoodInA_M_6	FoodInA_M_5	FoodInA_M_8		FoodInA_M_2	FoodInA_M_6	FoodInA_M_5	FoodInA_M_8	MEAN	SEM
2022/10/29 18:01:06	2022/11/17 18:03:25	24.6754	10.5701	6.33055	8.9524		0	0	0	0	0	0		11.2953	5.97656	9.53117	8.6331		0	0	0	0	0	0		12.8999	10.8058	23.2073	7.51478		0	0	0	0	0	0		14.9664	19.0354	6.95673	20.2611		0	0	0	0	0	0
2022/10/29 18:06:06	2022/11/17 18:08:25	24.742	10.5943	6.34734	8.95887		0.06658	0.02421	0.016793	0.006471	0.0285135	0.0131998		11.2953	5.97656	9.54209	8.64218		0	0	0.010917	0.009075	0.004998	0.00290999		12.8999	10.8058	23.2073	7.51478		0	0	0	0	0	0		14.9881	19.0354	6.95683	20.2692		0.02172	0	0.000104	0.00809	0.0074785	0.00511131
2022/10/29 18:11:06	2022/11/17 18:13:25	24.8089	10.6209	6.36694	8.9694		0.13352	0.05074	0.036391	0.016999	0.0594125	0.0256516		11.2953	5.97656	9.58519	8.69062		0	0	0.054019	0.05752	0.0278848	0.0161151		12.8999	10.8058	23.2317	7.51542		0	0	0.02436	0.000639	0.00624975	0.00603863		15.0004	19.0354	6.95712	20.2692		0.03403	0	0.000387	0.00809	0.0106268	0.00802043
2022/10/29 18:16:06	2022/11/17 18:18:25	24.8759	10.6218	6.38654	8.98585		0.20047	0.05163	0.055989	0.033453	0.0853855	0.0386706		11.2953	5.97656	9.6304	8.72025		0	0	0.099223	0.087148	0.0465928	0.027013		12.8999	10.8058	23.3434	7.51647		0	0	0.13613	0.001685	0.0344538	0.0338944		15.01	19.0354	6.9574	20.2693		0.04363	0	0.000673	0.00817	0.0131183	0.0103377
2022/10/29 18:21:06	2022/11/17 18:23:25	24.9428	10.6374	6.40088	9.04965		0.26742	0.06732	0.070333	0.097252	0.125581	0.0477559		11.2953	5.97656	9.67132	8.76727		0	0	0.14015	0.13417	0.06858	0.0396135		12.8999	10.8058	23.463	7.52787		0	0	0.25572	0.01309	0.0672025	0.0629149		15.01	19.0518	6.95769	20.2737		0.04363	0.01643	0.000959	0.01262	0.0184098	0.00902787
2022/10/29 18:26:06	2022/11/17 18:28:25	25.0098	10.6751	6.42305	9.06085		0.33437	0.10494	0.092502	0.10845	0.160065	0.0582021		11.2953	5.97656	9.67854	8.79636		0	0	0.147365	0.163253	0.0776545	0.044951		12.8999	10.8058	23.5375	7.60238		0	0	0.33023	0.087593	0.104456	0.0780387		15.01	19.13	6.958	20.2744		0.04363	0.09463	0.001272	0.01334	0.038218	0.0208077
2022/10/29 18:31:06	2022/11/17 18:33:25	25.0767	10.7128	6.42534	9.06085		0.40132	0.1427	0.094787	0.10845	0.186814	0.0722085		11.2953	5.97656	9.70386	8.80589		0	0	0.172687	0.172783	0.0863675	0.0498643		12.9082	10.8058	23.5628	7.63738		0.00836	0	0.35544	0.122597	0.121599	0.082811		15.01	19.2141	6.96429	20.2744		0.04363	0.17874	0.007564	0.01334	0.0608185	0.0400949
2022/10/29 18:36:06	2022/11/17 18:38:25	25.1435	10.7506	6.42534	9.06085		0.46809	0.18047	0.094787	0.10845	0.212949	0.0870987		11.2953	6.28096	9.75536	9.11601		0	0.3044	0.224182	0.482903	0.252871	0.10014		12.9138	10.8058	23.6558	7.64287		0.01395	0	0.44848	0.128089	0.14763	0.104306		15.01	19.2982	6.96597	20.2744		0.04363	0.26285	0.009241	0.01334	0.0822653	0.0606814
2022/10/29 18:41:06	2022/11/17 18:43:25	25.1831	10.7711	6.42534	9.06085		0.50767	0.20101	0.094787	0.10845	0.227979	0.096169		11.2985	6.2876	9.78068	9.11601		0.00325	0.311046	0.249504	0.482903	0.261676	0.0992937		12.9413	10.8058	23.7531	7.64491		0.0414	0	0.54576	0.130123	0.179321	0.125125		15.01	19.3569	6.96597	20.2744		0.04363	0.32149	0.009241	0.01334	0.0969253	0.0752467
2022/10/29 18:46:06	2022/11/17 18:48:25	25.275	10.7906	6.42534	9.06085		0.59958	0.22052	0.094787	0.10845	0.255834	0.117992		11.3021	6.2876	9.78068	9.11601		0.00683	0.311046	0.249504	0.482903	0.262571	0.0985183		12.9727	10.8079	23.8502	7.64548		0.07287	0.00207	0.64288	0.130693	0.212128	0.145973		15.01	19.359	6.96597	20.2955		0.04363	0.32356	0.009241	0.03443	0.102715	0.0739728
2022/10/29 18:51:06	2022/11/17 18:53:25	25.3154	10.8125	6.42534	9.06085		0.64002	0.24233	0.094787	0.10845	0.271397	0.127302		11.313	6.2876	9.78068	9.11601		0.01776	0.311046	0.249504	0.482903	0.265303	0.0961636		13.0042	10.813	23.8936	7.65793		0.10435	0.00719	0.68632	0.143141	0.23525	0.153051		15.0115	19.359	6.96597	20.3379		0.04514	0.32356	0.009241	0.07686	0.1137	0.0713037
2022/10/29 18:56:06	2022/11/17 18:58:25	25.3909	10.8125	6.42534	9.06085		0.71555	0.24233	0.094787	0.10845	0.290279	0.145612		11.3433	6.28762	9.78068	9.11836		0.048	0.31106	0.249504	0.485259	0.273456	0.0902213		13.0357	10.8179	23.8936	7.65827		0.13582	0.01209	0.68632	0.143487	0.244429	0.150342		15.0179	19.359	6.96597	20.3715		0.05148	0.32356	0.009241	0.11038	0.123665	0.0697842
2022/10/29 19:01:06	2022/11/17 19:03:25	25.4665	10.8125	6.42534	9.06085		0.79108	0.24233	0.094787	0.10845	0.309162	0.164051		11.3698	6.28955	9.78068	9.23503		0.07456	0.312993	0.249504	0.601923	0.309745	0.109666		13.0574	10.8191	23.8936	7.67622		0.15759	0.01331	0.68632	0.161433	0.254663	0.147957		15.0351	19.359	6.96597	20.385		0.06871	0.32356	0.009241	0.12389	0.13135	0.0682121
2022/10/29 19:06:06	2022/11/17 19:08:25	25.542	10.8256	6.42534	9.06085		0.86661	0.25546	0.094787	0.10845	0.331327	0.182096		11.3749	6.29284	9.78068	9.2411		0.07965	0.316283	0.249504	0.607993	0.313358	0.110119		13.0582	10.8191	23.8936	7.71719		0.15832	0.01331	0.68632	0.202402	0.265088	0.146104		15.0362	19.359	6.96597	20.3985		0.06978	0.32356	0.009241	0.13741	0.134998	0.0680867
2022/10/29 19:11:06	2022/11/17 19:13:25	25.6175	10.9009	6.42534	9.06085		0.94214	0.33072	0.094787	0.10845	0.369024	0.198543		11.3906	6.39573	9.78433	9.26082		0.09534	0.41917	0.253159	0.627714	0.348846	0.114067		13.0582	10.8191	23.8936	7.75824		0.15832	0.01331	0.68632	0.243458	0.275352	0.144993		15.0486	19.359	6.96597	20.4105		0.08218	0.32356	0.009241	0.14941	0.141098	0.067218
2022/10/29 19:16:06	2022/11/17 19:18:25	25.6882	10.9595	6.42534	9.06085		1.01282	0.3894	0.094787	0.10845	0.401364	0.214827		11.3906	6.39615	9.81638	9.27729		0.09534	0.41959	0.285209	0.644184	0.361081	0.11545		13.0582	10.8191	23.8936	7.78135		0.15832	0.01331	0.68632	0.266568	0.28113	0.144684		15.0637	19.3905	6.96597	20.4299		0.09732	0.35508	0.009241	0.16881	0.157613	0.0734666
2022/10/29 19:21:06	2022/11/17 19:23:25	25.7038	10.9618	6.42736	9.06724		1.02837	0.39163	0.09681	0.114844	0.407913	0.217544		11.3975	6.39615	9.85444	9.27764		0.1022	0.41959	0.323261	0.644541	0.372398	0.112439		13.0582	10.8612	23.8936	7.78144		0.15832	0.05536	0.68632	0.266654	0.291664	0.138443		15.071	19.4728	6.97438	20.4479		0.10467	0.43736	0.017655	0.18681	0.186624	0.0904321
2022/10/29 19:26:06	2022/11/17 19:28:25	25.7038	10.9618	6.44487	9.11439		1.02837	0.39163	0.114319	0.161994	0.424078	0.210329		11.3993	6.39615	9.89249	9.29551		0.10406	0.41959	0.361313	0.662407	0.386843	0.11461		13.0582	10.9565	23.8937	7.78144		0.15832	0.15069	0.68642	0.266654	0.315521	0.126437		15.0731	19.5557	7.04095	20.4606		0.10673	0.52033	0.084217	0.19949	0.227692	0.100685
2022/10/29 19:31:06	2022/11/17 19:33:25	25.7038	10.9618	6.46331	9.16875		1.02837	0.39163	0.132754	0.216354	0.442277	0.202673		11.4176	6.39615	9.93054	9.31157		0.12234	0.41959	0.399364	0.678464	0.40494	0.113624		13.0582	10.9942	23.9255	7.78144		0.15832	0.18839	0.71814	0.266654	0.332876	0.130435		15.094	19.6387	7.06584	20.481		0.12767	0.6033	0.10911	0.21992	0.265	0.11534
2022/10/29 19:36:06	2022/11/17 19:38:25	25.7038	10.9618	6.4662	9.21085		1.02837	0.39163	0.135649	0.258452	0.453525	0.198615		11.4957	6.39615	9.96859	9.31157		0.20039	0.41959	0.437416	0.678464	0.433965	0.0977052		13.0582	11.0374	23.9737	7.78202		0.15832	0.23159	0.76637	0.26724	0.35588	0.138695		15.0941	19.6803	7.06584	20.4907		0.12776	0.64494	0.10911	0.22964	0.277863	0.125193
2022/10/29 19:41:06	2022/11/17 19:43:25	25.7038	10.9619	6.4662	9.21378		1.02837	0.39177	0.135649	0.261381	0.454292	0.198373		11.5593	6.39615	10.0066	9.31157		0.26405	0.41959	0.475466	0.678464	0.459393	0.0856318		13.0582	11.0806	23.9795	7.7978		0.15832	0.27479	0.77223	0.283012	0.372088	0.136385		15.0941	19.6971	7.06584	20.4907		0.12776	0.66171	0.10911	0.22964	0.282055	0.129294
2022/10/29 19:46:06	2022/11/17 19:48:25	25.7038	10.9801	6.4662	9.21383		1.02837	0.40998	0.135649	0.261434	0.458858	0.197942		11.5636	6.39655	10.0296	9.32331		0.26833	0.419992	0.498396	0.69021	0.469232	0.0877819		13.0582	11.1238	23.9795	7.82026		0.15832	0.31799	0.77223	0.305471	0.388503	0.132946		15.0941	19.7217	7.06584	20.4907		0.12776	0.68635	0.10911	0.22964	0.288215	0.135329
2022/10/29 19:51:06	2022/11/17 19:53:25	25.7182	10.9923	6.4662	9.2408		1.04284	0.42219	0.135649	0.288401	0.47227	0.198993		11.5636	6.52994	10.0298	9.36969		0.26833	0.553383	0.498616	0.736585	0.514229	0.0964734		13.0595	11.167	23.9795	7.83913		0.15965	0.36119	0.77223	0.324345	0.404354	0.130217		15.0941	19.7293	7.06584	20.4907		0.12776	0.69394	0.10911	0.22964	0.290113	0.13719
2022/10/29 19:56:06	2022/11/17 19:58:25	25.7543	10.9923	6.4662	9.25721		1.07887	0.42219	0.135649	0.304812	0.48538	0.206386		11.5636	6.5843	10.0298	9.39672		0.26833	0.607743	0.498616	0.763618	0.534577	0.104081		13.1039	11.2102	23.9795	7.84126		0.20409	0.40439	0.77223	0.32647	0.426795	0.122301		15.0941	19.7408	7.06584	20.4907		0.12776	0.70546	0.10911	0.22964	0.292993	0.140017
2022/10/29 20:01:06	2022/11/17 20:03:25	25.8405	10.9923	6.4662	9.25721		1.16509	0.42219	0.135649	0.304812	0.506935	0.22713		11.5636	6.62781	10.0298	9.50292		0.26833	0.651257	0.498616	0.869815	0.572005	0.126681		13.1692	11.2441	23.9795	7.84126		0.26932	0.43833	0.77223	0.32647	0.451588	0.112496		15.0941	19.7534	7.0666	20.4907		0.12776	0.71805	0.109873	0.22964	0.296331	0.143026
2022/10/29 20:06:06	2022/11/17 20:08:25	25.9004	10.9926	6.47107	9.25721		1.22506	0.42244	0.140519	0.304812	0.523208	0.240987		11.5636	6.6315	10.0298	9.51034		0.26833	0.654945	0.498616	0.87724	0.574783	0.128329		13.2335	11.2467	23.9795	7.84126		0.33366	0.4409	0.77223	0.32647	0.468315	0.104629		15.0941	19.762	7.06818	20.4966		0.12776	0.72663	0.111446	0.23552	0.300339	0.144738
2022/10/29 20:11:06	2022/11/17 20:13:25	25.9004	11.0106	6.48397	9.25721		1.22506	0.44045	0.153419	0.304812	0.530935	0.238685		11.5636	6.6315	10.0298	9.5224		0.26833	0.654945	0.498616	0.889299	0.577798	0.130711		13.2563	11.2467	23.9795	7.84717		0.35641	0.4409	0.77223	0.332389	0.475482	0.101616		15.1039	19.7623	7.06974	20.5015		0.13751	0.72689	0.113007	0.24041	0.304454	0.143491
2022/10/29 20:16:06	2022/11/17 20:18:25	25.9004	11.0368	6.49699	9.25721		1.22506	0.46665	0.166436	0.304812	0.540739	0.236211		11.5636	6.6315	10.0298	9.52816		0.26833	0.654945	0.498616	0.895059	0.579238	0.131858		13.2563	11.2467	23.9861	7.89032		0.35641	0.4409	0.77883	0.37553	0.487917	0.0986433		15.1257	19.7623	7.07034	20.5336		0.1593	0.72689	0.11361	0.27248	0.31807	0.140304
2022/10/29 20:21:06	2022/11/17 20:23:25	25.9004	11.0414	6.51	9.25721		1.22506	0.47132	0.179454	0.304812	0.545161	0.234383		11.5636	6.6315	10.0298	9.5571		0.26833	0.654945	0.498616	0.923993	0.586471	0.137702		13.2563	11.2467	24.081	7.93995		0.35641	0.4409	0.87366	0.425169	0.524035	0.117977		15.1315	19.7623	7.07321	20.5568		0.16511	0.72689	0.116482	0.29574	0.326056	0.138868
2022/10/29 20:26:06	2022/11/17 20:28:25	25.9521	11.0414	6.52302	9.25721		1.27667	0.47132	0.192472	0.304812	0.561318	0.245233		11.5695	6.6315	10.0379	9.5571		0.27419	0.654945	0.506696	0.923993	0.589956	0.136151		13.2563	11.2467	24.2034	7.98959		0.35641	0.4409	0.99612	0.474801	0.567058	0.145171		15.1464	19.7623	7.07332	20.5614		0.18004	0.72689	0.116587	0.3003	0.330954	0.137366
2022/10/29 20:31:06	2022/11/17 20:33:25	26.125	11.0414	6.53604	9.25721		1.44958	0.47132	0.205489	0.304812	0.6078	0.285902		11.6031	6.6315	10.081	9.78337		0.30781	0.654945	0.549836	1.15026	0.665714	0.177113		13.2563	11.2467	24.3259	8.03486		0.35641	0.4409	1.11857	0.520071	0.608988	0.173116		15.157	19.7623	7.07332	20.5614		0.19064	0.72689	0.116587	0.3003	0.333604	0.136418
2022/10/29 20:36:06	2022/11/17 20:38:25	26.2925	11.0414	6.54906	9.27084		1.61715	0.47132	0.218507	0.31844	0.656354	0.324456		11.6235	6.73877	10.1282	9.78711		0.32817	0.762214	0.597046	1.154	0.710358	0.172823		13.2563	11.2467	24.4483	8.04332		0.35641	0.4409	1.24102	0.52854	0.641717	0.202834		15.1822	19.7625	7.07332	20.5614		0.21587	0.72709	0.116587	0.3003	0.339962	0.134393
2022/10/29 20:41:06	2022/11/17 20:43:25	26.3319	11.0414	6.56208	9.31338		1.65653	0.47132	0.231525	0.360983	0.68009	0.329148		11.6235	6.81996	10.1727	9.81143		0.32821	0.843402	0.641546	1.17833	0.747871	0.178381		13.2563	11.2467	24.5191	8.04332		0.35641	0.44091	1.31184	0.52854	0.659425	0.220292		15.1831	19.7649	7.07332	20.5614		0.21677	0.72954	0.116587	0.3003	0.340799	0.134912
2022/10/29 20:46:06	2022/11/17 20:48:25	26.374	11.0414	6.57279	9.35687		1.69865	0.47132	0.242238	0.404471	0.70417	0.334964		11.6235	6.86038	10.183	9.82566		0.32821	0.883826	0.651876	1.19256	0.764117	0.182689		13.2563	11.2659	24.5284	8.04332		0.35641	0.4601	1.32105	0.52854	0.666525	0.221025		15.186	19.7649	7.07332	20.5614		0.21959	0.72954	0.116587	0.3003	0.341504	0.134697
2022/10/29 20:51:06	2022/11/17 20:53:25	26.4391	11.0709	6.57393	9.40036		1.76373	0.50077	0.243378	0.447958	0.738959	0.34607		11.6304	6.87206	10.183	9.82567		0.33517	0.895501	0.651876	1.19256	0.768777	0.181964		13.2563	11.3022	24.5909	8.04332		0.35641	0.49643	1.38361	0.52854	0.691247	0.233793		15.186	19.7649	7.07332	20.5614		0.21959	0.72954	0.116587	0.3003	0.341504	0.134697
2022/10/29 20:56:06	2022/11/17 20:58:25	26.4674	11.1703	6.57526	9.43364		1.79204	0.6002	0.244714	0.481243	0.779549	0.345487		11.633	6.88481	10.183	9.82567		0.33773	0.908254	0.651876	1.19256	0.772605	0.182221		13.2793	11.3386	24.5909	8.04332		0.37948	0.53277	1.38361	0.52854	0.7061	0.228632		15.186	19.767	7.07332	20.5614		0.21959	0.73163	0.116587	0.3003	0.342027	0.135199
2022/10/29 21:01:06	2022/11/17 21:03:25	26.4674	11.2253	6.57553	9.43659		1.79204	0.65514	0.244976	0.484193	0.794087	0.34312		11.633	6.88713	10.183	9.82567		0.33773	0.910571	0.651876	1.19256	0.773185	0.182366		13.2793	11.3663	24.5909	8.04332		0.37948	0.56049	1.38361	0.52854	0.71303	0.22698		15.186	19.7794	7.07336	20.5614		0.21959	0.74398	0.116636	0.3003	0.345127	0.138161
2022/10/29 21:06:06	2022/11/17 21:08:25	26.4674	11.2728	6.57553	9.43929		1.79204	0.7027	0.244976	0.486895	0.806653	0.341506		11.633	6.88713	10.183	9.82567		0.33773	0.910571	0.651876	1.19256	0.773185	0.182366		13.5911	11.3681	24.5909	8.04332		0.69126	0.56226	1.38361	0.52854	0.791418	0.200487		15.186	19.7931	7.08427	20.576		0.21959	0.75772	0.127545	0.31491	0.354941	0.139601
2022/10/29 21:11:06	2022/11/17 21:13:25	26.527	11.321	6.57553	9.44744		1.85161	0.75086	0.244976	0.495042	0.835622	0.354057		11.6739	6.88713	10.1918	9.82567		0.37866	0.910571	0.660596	1.19256	0.785597	0.173796		13.5959	11.3681	24.5909	8.04332		0.69606	0.56226	1.38361	0.52854	0.792617	0.200291		15.186	19.8068	7.10344	20.5805		0.21959	0.77145	0.146714	0.31943	0.364296	0.140258
2022/10/29 21:16:06	2022/11/17 21:18:25	26.5709	11.349	6.57553	9.47644		1.89554	0.77889	0.244976	0.52404	0.860861	0.361714		11.7577	6.88713	10.2379	9.82567		0.46239	0.910571	0.706696	1.19256	0.818054	0.154842		13.5984	11.3681	24.5909	8.04332		0.69855	0.56226	1.38361	0.52854	0.79324	0.200192		15.186	19.8198	7.12261	20.588		0.21959	0.78446	0.165883	0.32695	0.374221	0.140785
2022/10/29 21:21:06	2022/11/17 21:23:25	26.5947	11.4059	6.57818	9.52478		1.91927	0.83573	0.247628	0.572382	0.893753	0.362377		11.7847	6.88713	10.2571	9.82567		0.48943	0.910571	0.725896	1.19256	0.829615	0.148539		13.5984	11.3681	24.5909	8.04332		0.69855	0.56226	1.38361	0.52854	0.79324	0.200192		15.2003	19.823	7.14178	20.6055		0.23392	0.78759	0.185051	0.34446	0.387755	0.137385
2022/10/29 21:26:06	2022/11/17 21:28:25	26.6468	11.4628	6.59035	9.52961		1.97143	0.89267	0.259794	0.577206	0.925275	0.371878		11.7847	6.88713	10.2571	9.82567		0.48943	0.910571	0.725896	1.19256	0.829615	0.148539		13.5984	11.3681	24.5909	8.04785		0.69855	0.56226	1.38361	0.533064	0.794371	0.199696		15.2647	19.823	7.15653	20.6262		0.29835	0.78759	0.199796	0.36509	0.412707	0.12949
2022/10/29 21:31:06	2022/11/17 21:33:25	26.7493	11.5188	6.60336	9.52961		2.07387	0.9487	0.272812	0.577206	0.968147	0.393629		11.7847	6.88713	10.2571	9.82567		0.48943	0.910571	0.725896	1.19256	0.829615	0.148539		13.5984	11.3681	24.5909	8.09389		0.69855	0.56226	1.38361	0.579102	0.805881	0.194951		15.2734	19.823	7.21124	20.6668		0.30697	0.78759	0.25451	0.40571	0.438695	0.120448
2022/10/29 21:36:06	2022/11/17 21:38:25	26.7493	11.538	6.61638	9.52961		2.07387	0.96791	0.28583	0.577206	0.976204	0.391658		11.786	6.88713	10.2661	9.82567		0.49072	0.910571	0.734916	1.19256	0.832192	0.147782		13.6005	11.3681	24.5909	8.14996		0.7006	0.56226	1.38361	0.635178	0.820412	0.189847		15.2923	19.823	7.28105	20.6714		0.32593	0.78759	0.324319	0.41031	0.462037	0.11036
2022/10/29 21:41:06	2022/11/17 21:43:25	26.7493	11.538	6.6294	9.52961		2.07387	0.96791	0.298847	0.577206	0.979458	0.389755		11.8553	7.00838	10.3056	9.82567		0.56007	1.03182	0.774466	1.19256	0.889729	0.1396		13.6107	11.3681	24.5909	8.20604		0.71085	0.56226	1.38361	0.691254	0.836994	0.185162		15.2923	19.823	7.3455	20.6756		0.32593	0.78759	0.388773	0.41451	0.479201	0.104466
2022/10/29 21:46:06	2022/11/17 21:48:25	26.7493	11.538	6.64242	9.54721		2.07387	0.96791	0.311865	0.594809	0.987113	0.386358		11.9303	7.06345	10.3477	9.82567		0.63498	1.08689	0.816526	1.19256	0.932739	0.126963		13.6107	11.3681	24.5909	8.26211		0.71085	0.56226	1.38361	0.74733	0.851012	0.181988		15.2923	19.823	7.35842	20.6756		0.32593	0.78759	0.40169	0.41451	0.48243	0.10358
2022/10/29 21:51:06	2022/11/17 21:53:25	26.7493	11.538	6.64929	9.60259		2.07387	0.96791	0.318738	0.650188	1.00268	0.380864		11.9328	7.11862	10.3898	9.82567		0.63755	1.14207	0.858586	1.19256	0.957691	0.129573		13.6107	11.3681	24.5909	8.31819		0.71085	0.56226	1.38361	0.803407	0.865032	0.179853		15.2923	19.9119	7.35842	20.6756		0.32593	0.87646	0.40169	0.41451	0.504648	0.125469
2022/10/29 21:56:06	2022/11/17 21:58:25	26.7493	11.538	6.66114	9.65924		2.07387	0.96791	0.330588	0.706836	1.0198	0.374913		11.9328	7.14069	10.4318	9.82567		0.63755	1.16413	0.900636	1.19256	0.97372	0.129904		13.6107	11.3957	24.5909	8.36412		0.71085	0.58989	1.38361	0.849333	0.883421	0.174951		15.2923	20.3082	7.35842	20.6756		0.32593	1.2728	0.40169	0.41451	0.603733	0.223877
2022/10/29 22:01:06	2022/11/17 22:03:25	26.7493	11.538	6.67057	9.71588		2.07387	0.96791	0.340022	0.763484	1.03632	0.369736		11.9328	7.14746	10.4689	9.82567		0.63755	1.1709	0.937746	1.19256	0.984689	0.129291		13.6107	11.45	24.592	8.36857		0.71085	0.64425	1.38467	0.853782	0.898388	0.167883		15.2923	20.5024	7.35842	20.6756		0.32593	1.46698	0.40169	0.41451	0.652278	0.27227
2022/10/29 22:06:06	2022/11/17 22:08:25	26.7493	11.538	6.67057	9.74832		2.07387	0.96791	0.340022	0.795917	1.04443	0.367826		11.9328	7.22059	10.4933	9.82567		0.63755	1.24403	0.962176	1.19256	1.00908	0.138173		13.6107	11.5044	24.7159	8.36857		0.71085	0.69861	1.50856	0.853782	0.94295	0.191798		15.2923	20.5024	7.35842	20.6756		0.32593	1.46701	0.40169	0.41451	0.652285	0.272277
2022/10/29 22:11:06	2022/11/17 22:13:25	26.7493	11.538	6.67057	9.75194		2.07387	0.96791	0.340022	0.799538	1.04533	0.367623		11.9328	7.24659	10.5459	9.92882		0.63755	1.27004	1.01473	1.29572	1.05451	0.152771		13.6107	11.5588	24.9421	8.36857		0.71085	0.75297	1.73481	0.853782	1.0131	0.24243		15.2923	20.5129	7.35842	20.6756		0.32593	1.47746	0.40169	0.41451	0.654898	0.274883
2022/10/29 22:16:06	2022/11/17 22:18:25	26.7493	11.538	6.67057	9.75346		2.07387	0.96791	0.340022	0.801065	1.04572	0.367538		11.9328	7.24659	10.5991	9.93812		0.63755	1.27004	1.06794	1.30502	1.07013	0.153369		13.6107	11.5922	24.9871	8.36857		0.71085	0.78638	1.77976	0.853782	1.03269	0.250727		15.2923	20.5258	7.35842	20.68		0.32593	1.49042	0.40169	0.41892	0.65924	0.277795
2022/10/29 22:21:06	2022/11/17 22:23:25	26.7493	11.538	6.67057	9.75446		2.07387	0.96791	0.340022	0.80206	1.04597	0.367483		11.9328	7.24659	10.6408	9.93958		0.63755	1.27004	1.10963	1.30648	1.08092	0.153851		13.6107	11.6091	25.0617	8.36857		0.71085	0.8033	1.85444	0.853782	1.05559	0.267922		15.3001	20.557	7.35842	20.7134		0.33376	1.52161	0.40169	0.45229	0.677338	0.28247
2022/10/29 22:26:06	2022/11/17 22:28:25	26.7493	11.5401	6.67057	9.75517		2.07387	0.97	0.340022	0.802771	1.04667	0.367407		11.9328	7.24659	10.6439	9.93958		0.63755	1.27004	1.11273	1.30648	1.0817	0.153901		13.6107	11.6363	25.1303	8.36857		0.71085	0.83048	1.92301	0.853782	1.07953	0.282897		15.3175	20.5967	7.35842	20.7252		0.35111	1.5613	0.40169	0.46411	0.694553	0.289838
2022/10/29 22:31:06	2022/11/17 22:33:25	26.7493	11.5603	6.67057	9.76189		2.07387	0.9902	0.340022	0.809489	1.0534	0.366714		11.9328	7.24659	10.6449	9.93958		0.63755	1.27004	1.11375	1.30648	1.08195	0.153918		13.611	11.6635	25.3092	8.38529		0.71117	0.85766	2.10192	0.870505	1.13531	0.324222		15.3364	20.5967	7.35842	20.757		0.37001	1.5613	0.40169	0.49594	0.707235	0.285942
2022/10/29 22:36:06	2022/11/17 22:38:25	26.7493	11.5664	6.67104	9.78681		2.07387	0.99625	0.340487	0.834415	1.06126	0.365214		11.9328	7.24986	10.6691	9.93958		0.63755	1.27331	1.13788	1.30648	1.0888	0.154774		13.6126	11.6906	25.4964	8.44912		0.71272	0.88484	2.28907	0.934331	1.20524	0.364384		15.3407	20.5967	7.35842	20.7663		0.37431	1.5613	0.40169	0.50522	0.71063	0.284954
2022/10/29 22:41:06	2022/11/17 22:43:25	26.7493	11.585	6.71386	9.79175		2.07387	1.01483	0.383306	0.839351	1.07784	0.357689		11.9328	7.29608	10.7028	9.93958		0.63755	1.31953	1.17164	1.30648	1.1088	0.1606		13.6266	11.7104	25.557	8.51578		0.7268	0.90457	2.3497	1.00099	1.24552	0.372416		15.3407	20.5967	7.35842	20.7977		0.37431	1.5613	0.40169	0.53657	0.718468	0.283173
2022/10/29 22:46:06	2022/11/17 22:48:25	26.7493	11.6237	6.77884	9.79175		2.07387	1.05359	0.448289	0.839351	1.10377	0.346793		11.9328	7.35559	10.7272	9.93958		0.63755	1.37904	1.19604	1.30648	1.12977	0.168333		13.6284	11.7134	25.5651	8.58244		0.72856	0.90765	2.35778	1.06765	1.26541	0.37065		15.3522	20.5967	7.35842	20.8022		0.38583	1.5613	0.40169	0.54116	0.722495	0.281771
2022/10/29 22:51:06	2022/11/17 22:53:25	26.7493	11.6516	6.8123	9.81199		2.07387	1.08142	0.481745	0.859591	1.12416	0.33991		11.9329	7.38738	10.7283	9.93958		0.63758	1.41082	1.19713	1.30648	1.138	0.172417		13.6459	11.7202	25.6253	8.64466		0.74604	0.91436	2.41803	1.12988	1.30208	0.380187		15.3895	20.5967	7.36894	20.8388		0.42312	1.5613	0.412211	0.57768	0.743578	0.27518
2022/10/29 22:56:06	2022/11/17 22:58:25	26.7493	11.6732	6.88742	9.87421		2.07387	1.10308	0.556865	0.921814	1.16391	0.323888		11.952	7.3988	10.7283	9.93958		0.65669	1.42224	1.19713	1.30648	1.14563	0.169337		13.6744	11.7658	25.7312	8.6581		0.77455	0.95998	2.52389	1.14332	1.35043	0.398329		15.4105	20.5967	7.39806	20.8485		0.44407	1.5613	0.441326	0.58741	0.758526	0.269757
2022/10/29 23:01:06	2022/11/17 23:03:25	26.7493	11.6887	6.90151	9.93773		2.07387	1.1186	0.570954	0.985329	1.18719	0.317726		11.9877	7.3988	10.7283	10.0412		0.69245	1.42224	1.19713	1.40812	1.17999	0.17047		13.6744	11.8178	25.8261	8.6581		0.77455	1.01202	2.61879	1.14332	1.38717	0.417572		15.4837	20.5967	7.42752	20.8563		0.51734	1.5613	0.470794	0.59519	0.786156	0.259652
2022/10/29 23:06:06	2022/11/17 23:08:25	26.7611	11.7185	6.91256	9.9989		2.08566	1.14835	0.582009	1.0465	1.21563	0.315114		12.0187	7.3988	10.7283	10.044		0.72341	1.42224	1.19713	1.41086	1.18841	0.163418		13.6744	11.9184	25.8418	8.6581		0.77455	1.11255	2.63451	1.14332	1.41623	0.414594		15.4838	20.6055	7.44765	20.8623		0.51739	1.5701	0.490917	0.60119	0.794899	0.259467
2022/10/29 23:11:06	2022/11/17 23:13:25	26.8345	11.7482	6.92543	10.0158		2.15915	1.17811	0.594883	1.06335	1.24887	0.3286		12.0228	7.3988	10.7283	10.044		0.72756	1.42224	1.19713	1.41086	1.18945	0.162434		13.6744	12.019	25.8418	8.6581		0.77455	1.21317	2.63451	1.14332	1.44139	0.40918		15.4958	20.6079	7.4876	20.8934		0.52938	1.57253	0.530872	0.63226	0.816261	0.253237
2022/10/29 23:16:06	2022/11/17 23:18:25	26.9169	11.778	6.93831	10.0173		2.24154	1.20786	0.607758	1.06485	1.2805	0.344959		12.0318	7.3988	10.7283	10.044		0.73651	1.42224	1.19713	1.41086	1.19169	0.160315		13.6744	12.019	25.8418	8.6581		0.77455	1.21317	2.63451	1.14332	1.44139	0.40918		15.5139	20.608	7.55046	20.9177		0.54748	1.57257	0.593736	0.65665	0.842609	0.244347
2022/10/29 23:21:06	2022/11/17 23:23:25	26.9993	11.8	6.95118	10.0188		2.32394	1.22987	0.620632	1.06635	1.3102	0.361604		12.0553	7.50225	10.7283	10.044		0.76005	1.5257	1.19713	1.41086	1.22343	0.168797		13.6744	12.019	25.8418	8.6581		0.77455	1.21317	2.63451	1.14332	1.44139	0.40918		15.5161	20.6309	7.61373	20.9421		0.54974	1.59549	0.656998	0.68103	0.870815	0.243238
2022/10/29 23:26:06	2022/11/17 23:28:25	27.0817	11.8011	6.96235	10.022		2.40634	1.23102	0.6318	1.0696	1.33469	0.37898		12.0777	7.54302	10.747	10.044		0.78241	1.56646	1.21586	1.41086	1.2439	0.169726		13.6744	12.019	25.8418	8.6581		0.77455	1.21317	2.63451	1.14332	1.44139	0.40918		15.5161	20.6365	7.7024	20.9865		0.54974	1.60116	0.745676	0.72542	0.905499	0.236023
2022/10/29 23:31:06	2022/11/17 23:33:25	27.1597	11.8011	7.00546	10.053		2.4843	1.23102	0.674909	1.1006	1.37271	0.389088		12.0828	7.59395	10.7853	10.044		0.78756	1.61739	1.25411	1.41086	1.26748	0.176422		13.6744	12.019	25.8418	8.68876		0.77455	1.21317	2.63451	1.17397	1.44905	0.407387		15.5161	20.6365	7.70471	21.0609		0.54974	1.60116	0.747984	0.79981	0.924673	0.231844
2022/10/29 23:36:06	2022/11/17 23:38:25	27.1857	11.8011	7.02753	10.1114		2.51036	1.23102	0.69698	1.15897	1.39933	0.388778		12.0828	7.63855	10.802	10.044		0.78756	1.66199	1.27087	1.41086	1.28282	0.183846		13.6744	12.019	25.8418	8.75027		0.77455	1.21317	2.63451	1.23548	1.46443	0.404204		15.5161	20.6365	7.70767	21.0953		0.54974	1.60116	0.750941	0.83419	0.934008	0.230259
2022/10/29 23:41:06	2022/11/17 23:43:25	27.2082	11.8011	7.02753	10.1576		2.53283	1.23102	0.69698	1.20519	1.41651	0.391892		12.0828	7.65437	10.814	10.044		0.78756	1.67782	1.28283	1.41086	1.28977	0.186527		13.6744	12.019	25.8418	8.79561		0.77455	1.21317	2.63451	1.28083	1.47576	0.402218		15.5161	20.6365	7.72289	21.1136		0.54974	1.60116	0.766163	0.85255	0.942403	0.228633
2022/10/29 23:46:06	2022/11/17 23:48:25	27.2311	11.8011	7.02753	10.1613		2.55572	1.23102	0.69698	1.20887	1.42315	0.397164		12.0828	7.68542	10.8709	10.044		0.78756	1.70886	1.33975	1.41086	1.31176	0.192154		13.6745	12.019	25.8418	8.80736		0.77469	1.21317	2.63451	1.29257	1.47874	0.401733		15.5161	20.6365	7.72396	21.147		0.54974	1.60116	0.767228	0.88593	0.951015	0.227619
2022/10/29 23:51:06	2022/11/17 23:53:25	27.254	11.8011	7.02753	10.1613		2.5786	1.23102	0.69698	1.20887	1.42887	0.402605		12.0828	7.71732	10.9275	10.044		0.78756	1.74076	1.39636	1.41086	1.33388	0.198714		13.6753	12.019	25.8418	8.82524		0.77544	1.21317	2.63451	1.31046	1.48339	0.400957		15.5161	20.6365	7.72396	21.1651		0.54974	1.60116	0.767228	0.90405	0.955545	0.227232
2022/10/29 23:56:06	2022/11/17 23:58:25	27.2677	11.8011	7.02753	10.1613		2.59233	1.23102	0.69698	1.20887	1.4323	0.405873		12.0828	7.74299	10.941	10.044		0.78756	1.76643	1.4098	1.41086	1.34366	0.203485		13.6755	12.019	25.8418	8.82615		0.77567	1.21317	2.63451	1.31137	1.48368	0.40089		15.5161	20.6365	7.72396	21.1777		0.54974	1.60116	0.767228	0.91657	0.958675	0.227017
2022/10/30 00:01:06	2022/11/18 00:03:25	27.2678	11.8196	7.02753	10.1613		2.59245	1.24943	0.696981	1.20887	1.43693	0.405166		12.0846	7.84523	10.9429	10.044		0.78934	1.86867	1.41172	1.41086	1.37015	0.221595		13.6756	12.019	25.8568	8.82615		0.77572	1.21317	2.64951	1.31137	1.48744	0.404473		15.5161	20.6365	7.72396	21.1822		0.54974	1.60116	0.767228	0.92116	0.959822	0.226949
2022/10/30 00:06:06	2022/11/18 00:08:25	27.2814	11.8904	7.03117	10.1613		2.60597	1.32031	0.700616	1.20887	1.45894	0.40543		12.1412	7.84523	10.9429	10.0451		0.84592	1.86867	1.41172	1.41203	1.38458	0.209362		13.6777	12.019	25.9589	8.82615		0.77787	1.21317	2.75163	1.31137	1.51351	0.428678		15.5161	20.6367	7.72396	21.2044		0.54974	1.6013	0.767228	0.94329	0.96539	0.226735
2022/10/30 00:11:06	2022/11/18 00:13:25	27.3085	11.9587	7.03832	10.1613		2.63312	1.38853	0.707769	1.20887	1.48457	0.409046		12.2236	7.84523	10.9429	10.0502		0.92832	1.86867	1.41172	1.41714	1.40646	0.192007		13.6777	12.019	26.0751	8.82615		0.7779	1.21317	2.86779	1.31137	1.54256	0.456699		15.5161	20.6387	7.72396	21.2526		0.54974	1.60331	0.767228	0.99154	0.977955	0.227125
2022/10/30 00:16:06	2022/11/18 00:18:25	27.442	11.9881	7.04497	10.1613		2.76657	1.41799	0.714418	1.20887	1.52696	0.43874		12.2995	7.84523	10.9429	10.0556		1.00418	1.86867	1.41172	1.42254	1.42678	0.176566		13.6777	12.019	26.1913	8.82615		0.7779	1.21317	2.98395	1.31137	1.5716	0.484844		15.5161	20.6387	7.72396	21.254		0.54974	1.60334	0.767228	0.99287	0.978295	0.227138
2022/10/30 00:21:06	2022/11/18 00:23:25	27.5152	11.9983	7.05597	10.1851		2.83978	1.42815	0.725415	1.2327	1.55651	0.452662		12.3144	7.84523	10.9429	10.0577		1.01909	1.86867	1.41172	1.42464	1.43103	0.173599		13.6777	12.019	26.3019	8.82615		0.7779	1.21317	3.09459	1.31137	1.59926	0.511745		15.5921	20.6387	7.72396	21.254		0.62573	1.60334	0.767228	0.99287	0.997292	0.215697
2022/10/30 00:26:06	2022/11/18 00:28:25	27.5152	12.0467	7.08121	10.2326		2.83978	1.4766	0.750657	1.28019	1.58681	0.444901		12.3144	7.84604	10.9429	10.1619		1.01909	1.86948	1.41172	1.5288	1.45727	0.175383		13.6777	12.019	26.3429	8.82615		0.7779	1.21317	3.1356	1.31137	1.60951	0.521736		15.785	20.6387	7.72396	21.254		0.81858	1.60334	0.767228	0.99287	1.0455	0.192112
2022/10/30 00:31:06	2022/11/18 00:33:25	27.5152	12.1015	7.10667	10.2801		2.83978	1.53134	0.77612	1.32768	1.61873	0.43716		12.3144	7.84651	10.9429	10.1952		1.01909	1.86996	1.41172	1.56207	1.46571	0.176797		13.6777	12.019	26.4291	8.82615		0.7779	1.21317	3.22175	1.31137	1.63105	0.542756		15.785	20.6387	7.72479	21.254		0.81858	1.60334	0.768063	0.99287	1.04571	0.192011
2022/10/30 00:36:06	2022/11/18 00:38:25	27.5152	12.1211	7.13213	10.3218		2.83978	1.55093	0.801583	1.36936	1.64041	0.430464		12.3144	7.84651	11.3806	10.2216		1.01909	1.86996	1.84946	1.58851	1.58175	0.198192		13.6777	12.019	26.482	8.82615		0.7779	1.21317	3.27467	1.31137	1.64428	0.555688		15.785	20.6387	7.72579	21.254		0.81858	1.60334	0.769056	0.99287	1.04596	0.191892
2022/10/30 00:41:06	2022/11/18 00:43:25	27.5152	12.1231	7.1576	10.3395		2.83978	1.55295	0.827047	1.38711	1.65172	0.425377		12.3144	7.84651	11.5866	10.2314		1.01909	1.86996	2.05546	1.59826	1.63569	0.225957		13.6777	12.0531	26.4821	8.82615		0.7779	1.2473	3.27477	1.31137	1.65283	0.553567		15.785	20.6387	7.72579	21.254		0.81858	1.60334	0.769056	0.99287	1.04596	0.191892
2022/10/30 00:46:06	2022/11/18 00:48:25	27.5152	12.1231	7.18306	10.371		2.83978	1.55295	0.85251	1.41855	1.66595	0.419676		12.3144	7.84695	11.5896	10.2437		1.01909	1.8704	2.05839	1.61056	1.63961	0.226297		13.6777	12.122	26.4821	8.82615		0.7779	1.31625	3.27477	1.31137	1.67007	0.549612		15.785	20.6387	7.72579	21.254		0.81858	1.60334	0.769056	0.99287	1.04596	0.191892
2022/10/30 00:51:06	2022/11/18 00:53:25	27.5152	12.1231	7.20852	10.4005		2.83978	1.55295	0.877973	1.44807	1.67969	0.414153		12.3144	7.86415	11.5972	10.2528		1.01909	1.88759	2.06601	1.61969	1.64809	0.228849		13.6777	12.191	26.4821	8.82615		0.7779	1.3852	3.27477	1.31137	1.68731	0.546173		15.8139	20.6388	7.72579	21.254		0.84749	1.60339	0.769056	0.99287	1.0532	0.189166
2022/10/30 00:56:06	2022/11/18 00:58:25	27.5152	12.1231	7.23193	10.4067		2.83978	1.55295	0.901382	1.45428	1.6871	0.410104		12.3144	7.8899	11.6341	10.2593		1.01909	1.91334	2.10293	1.62615	1.66538	0.236672		13.6777	12.2383	26.4821	8.82616		0.7779	1.43254	3.27477	1.31137	1.69915	0.544115		15.8804	20.64	7.72579	21.254		0.914	1.60462	0.769056	0.99287	1.07014	0.18409
2022/10/30 01:01:06	2022/11/18 01:03:25	27.5152	12.1231	7.23649	10.4067		2.83978	1.55295	0.90594	1.45428	1.68824	0.409377		12.3144	7.91565	11.6444	10.2719		1.01909	1.93909	2.11326	1.63875	1.67755	0.240368		13.6777	12.2398	26.4821	8.83145		0.7779	1.43404	3.27477	1.31666	1.70084	0.543741		15.8918	20.64	7.72579	21.254		0.92545	1.60464	0.769056	0.99287	1.073	0.183306
2022/10/30 01:06:06	2022/11/18 01:08:25	27.5152	12.1231	7.23649	10.4067		2.83978	1.55295	0.90594	1.45428	1.68824	0.409377		12.3144	7.94007	11.647	10.2719		1.01909	1.96351	2.11583	1.63875	1.68429	0.243028		13.6777	12.2398	26.4821	8.83438		0.7779	1.43404	3.27477	1.3196	1.70158	0.543568		15.8918	20.64	7.72579	21.254		0.92545	1.60464	0.769056	0.99287	1.073	0.183306
2022/10/30 01:11:06	2022/11/18 01:13:25	27.5152	12.1231	7.23649	10.4067		2.83978	1.55295	0.90594	1.45428	1.68824	0.409377		12.3299	8.04599	11.6586	10.2719		1.03461	2.06943	2.12743	1.63875	1.71755	0.252395		13.6777	12.2398	26.4821	8.835		0.7779	1.43404	3.27477	1.32022	1.70173	0.543532		15.8918	20.64	7.89022	21.254		0.92545	1.60464	0.933494	0.99287	1.11411	0.164198
2022/10/30 01:16:06	2022/11/18 01:18:25	27.5152	12.1231	7.23649	10.4067		2.83978	1.55295	0.90594	1.45428	1.68824	0.409377		12.371	8.04599	11.6622	10.2719		1.07572	2.06943	2.13107	1.63875	1.72874	0.243665		13.6777	12.2398	26.4821	8.835		0.7779	1.43404	3.27477	1.32022	1.70173	0.543532		15.8918	20.64	8.32287	21.254		0.92545	1.60464	1.36614	0.99287	1.22228	0.160112
2022/10/30 01:21:06	2022/11/18 01:23:25	27.5152	12.1231	7.23649	10.4067		2.83978	1.55295	0.90594	1.45428	1.68824	0.409377		12.4125	8.04599	11.6622	10.2719		1.11721	2.06943	2.13107	1.63875	1.73911	0.234445		13.6777	12.2398	26.4821	8.835		0.7779	1.43404	3.27477	1.32022	1.70173	0.543532		15.8918	20.64	8.45447	21.254		0.92545	1.60464	1.49774	0.99287	1.25518	0.172841
2022/10/30 01:26:06	2022/11/18 01:28:25	27.5152	12.1231	7.23649	10.4067		2.83978	1.55295	0.90594	1.45428	1.68824	0.409377		12.4431	8.04599	11.6622	10.2719		1.14781	2.06943	2.13107	1.63875	1.74676	0.227709		13.6777	12.2398	26.4821	8.835		0.7779	1.43404	3.27477	1.32022	1.70173	0.543532		15.8918	20.64	8.45447	21.254		0.92545	1.60464	1.49774	0.99287	1.25518	0.172841
2022/10/30 01:31:06	2022/11/18 01:33:25	27.5152	12.1231	7.23649	10.4067		2.83978	1.55295	0.90594	1.45428	1.68824	0.409377		12.4489	8.04599	11.6622	10.2719		1.15361	2.06943	2.13107	1.63875	1.74821	0.226439		13.6777	12.2398	26.4821	8.835		0.7779	1.43404	3.27477	1.32022	1.70173	0.543532		15.8918	20.64	8.45447	21.254		0.92545	1.60464	1.49774	0.99287	1.25518	0.172841
2022/10/30 01:36:06	2022/11/18 01:38:25	27.5152	12.1231	7.23649	10.4111		2.83978	1.55295	0.90594	1.45873	1.68935	0.409167		12.4552	8.04599	11.6622	10.2719		1.15991	2.06943	2.13107	1.63875	1.74979	0.225061		13.6777	12.2398	26.4821	8.84379		0.7779	1.43404	3.27477	1.329	1.70393	0.543023		15.8918	20.6405	8.45447	21.254		0.92545	1.60512	1.49774	0.99287	1.2553	0.172922
2022/10/30 01:41:06	2022/11/18 01:43:25	27.5152	12.1233	7.23649	10.4719		2.83978	1.55319	0.90594	1.51952	1.70461	0.406578		12.459	8.04599	11.6622	10.2719		1.16377	2.06943	2.13107	1.63875	1.75075	0.224219		13.6777	12.2398	26.4821	9.02251		0.7779	1.43404	3.27477	1.50772	1.74861	0.534511		15.8918	20.6437	8.45461	21.254		0.92545	1.60833	1.49788	0.99287	1.25613	0.17348
2022/10/30 01:46:06	2022/11/18 01:48:25	27.5152	12.1395	7.23649	10.5497		2.83978	1.56938	0.90594	1.59734	1.72811	0.403533		12.4591	8.04599	11.6622	10.2719		1.16382	2.06943	2.13107	1.63875	1.75077	0.224208		13.6777	12.24	26.4821	9.26655		0.7779	1.43423	3.27477	1.75177	1.80967	0.528786		15.8918	20.6437	8.45582	21.254		0.92545	1.60833	1.49909	0.99287	1.25643	0.17362
2022/10/30 01:51:06	2022/11/18 01:53:25	27.5152	12.1653	7.23649	10.6188		2.83978	1.59513	0.90594	1.66638	1.75181	0.401146		12.4591	8.05121	11.6627	10.2719		1.16382	2.07465	2.13156	1.63875	1.75219	0.224898		13.6777	12.2669	26.4899	9.51059		0.7779	1.46112	3.2826	1.99581	1.87936	0.529999		15.8918	20.644	8.45725	21.254		0.92545	1.60861	1.50052	0.99287	1.25686	0.173835
2022/10/30 01:56:06	2022/11/18 01:58:25	27.5152	12.1844	7.23649	10.6299		2.83978	1.61424	0.90594	1.6775	1.75937	0.400353		12.4591	8.08053	11.6717	10.2719		1.16382	2.10397	2.14058	1.63875	1.76178	0.229724		13.6777	12.3293	26.6131	9.63059		0.7779	1.52353	3.40574	2.1158	1.95574	0.555445		15.8918	20.6533	8.45825	21.254		0.92545	1.61794	1.50152	0.99287	1.25945	0.175531
2022/10/30 02:01:06	2022/11/18 02:03:25	27.5152	12.1854	7.23649	10.6738		2.83978	1.61526	0.90594	1.72141	1.7706	0.399722		12.4591	8.11286	11.6736	10.2719		1.16382	2.1363	2.14244	1.63875	1.77033	0.234088		13.6777	12.4629	26.7449	9.63228		0.7779	1.65712	3.53757	2.11749	2.02252	0.576411		15.8918	20.6547	8.45829	21.254		0.92545	1.61927	1.50156	0.99287	1.25979	0.175762
2022/10/30 02:06:06	2022/11/18 02:08:25	27.5162	12.1854	7.23991	10.7146		2.84083	1.61526	0.90936	1.76218	1.78191	0.399042		12.4591	8.13804	11.6736	10.2719		1.16382	2.16148	2.14244	1.63875	1.77662	0.23743		13.6777	12.4629	26.7575	9.63681		0.7779	1.65712	3.55016	2.12203	2.0268	0.579231		15.8918	20.665	8.45829	21.254		0.92545	1.62959	1.50156	0.99287	1.26237	0.177531
2022/10/30 02:11:06	2022/11/18 02:13:25	27.5615	12.1854	7.26056	10.7147		2.88613	1.61526	0.930007	1.76231	1.79843	0.405391		12.4591	8.13985	11.6815	10.2719		1.16382	2.1633	2.15034	1.63875	1.77905	0.238693		13.6777	12.4629	26.7575	9.63681		0.7779	1.65712	3.55016	2.12203	2.0268	0.579231		15.8918	20.6974	8.45829	21.254		0.92545	1.66203	1.50156	0.99287	1.27048	0.183217
2022/10/30 02:16:06	2022/11/18 02:18:25	27.6302	12.1854	7.28359	10.7157		2.95479	1.61526	0.953038	1.76331	1.8216	0.416783		12.4591	8.13985	11.6825	10.2782		1.16382	2.1633	2.15133	1.64505	1.78087	0.238517		13.6777	12.4629	26.7575	9.63681		0.7779	1.65712	3.55016	2.12203	2.0268	0.579231		15.8918	20.7277	8.45829	21.271		0.92545	1.69231	1.50156	1.00992	1.28231	0.186573
2022/10/30 02:21:06	2022/11/18 02:23:25	27.6988	12.1854	7.30662	10.7186		3.02345	1.61526	0.97607	1.76615	1.84523	0.428445		12.4591	8.13985	11.6825	10.3802		1.16382	2.1633	2.15133	1.74712	1.80639	0.235013		13.7	12.4629	26.7575	9.63681		0.80014	1.65712	3.55016	2.12203	2.03236	0.575248		15.8918	20.7333	8.45829	21.2866		0.92547	1.69793	1.50156	1.02546	1.2876	0.185743
2022/10/30 02:26:06	2022/11/18 02:28:25	27.7675	12.1854	7.32965	10.7186		3.09212	1.61526	0.999101	1.76615	1.86816	0.440426		12.4591	8.13985	11.6825	10.3802		1.16382	2.1633	2.15133	1.74712	1.80639	0.235013		13.7156	12.4629	26.7575	9.63681		0.81571	1.65712	3.55016	2.12203	2.03625	0.572476		15.9202	20.7354	8.45829	21.2866		0.95381	1.70003	1.50156	1.02546	1.29521	0.181608
2022/10/30 02:31:06	2022/11/18 02:33:25	27.8362	12.1854	7.34715	10.7186		3.16078	1.61526	1.0166	1.76615	1.8897	0.453553		12.463	8.13985	11.6825	10.3802		1.16774	2.1633	2.15133	1.74712	1.80737	0.23412		13.7156	12.4629	26.7575	9.63681		0.81571	1.65712	3.55016	2.12203	2.03625	0.572476		15.9745	20.7521	8.45829	21.2866		1.00817	1.7167	1.50156	1.02546	1.31297	0.176571
2022/10/30 02:36:06	2022/11/18 02:38:25	27.9048	12.1854	7.36264	10.7186		3.22945	1.61526	1.03209	1.76615	1.91074	0.467193		12.5713	8.13985	11.6837	10.3802		1.27604	2.1633	2.15256	1.74712	1.83475	0.209917		13.7156	12.4897	26.7575	9.63681		0.81571	1.6839	3.55016	2.12203	2.04295	0.571035		16.0289	20.7716	8.45829	21.316		1.06253	1.73616	1.50156	1.05493	1.33879	0.168645
2022/10/30 02:41:06	2022/11/18 02:43:25	27.9433	12.1854	7.36618	10.7186		3.26789	1.61526	1.03563	1.76615	1.92123	0.475697		12.7261	8.13985	11.6864	10.3933		1.43082	2.1633	2.15524	1.76021	1.87739	0.176091		13.7156	12.553	26.7575	9.63681		0.81571	1.74717	3.55016	2.12203	2.05877	0.56793		16.0654	20.791	8.45829	21.3408		1.09898	1.75561	1.50156	1.07972	1.35897	0.164121
2022/10/30 02:46:06	2022/11/18 02:48:25	27.9434	12.1854	7.36618	10.7186		3.26802	1.61526	1.03563	1.76615	1.92126	0.475728		12.8073	8.13985	11.6864	10.4214		1.51203	2.1633	2.15524	1.7883	1.90471	0.157422		13.7156	12.5923	26.7575	9.63681		0.81571	1.78648	3.55016	2.12203	2.06859	0.566215		16.0663	20.8104	8.45829	21.3996		1.09995	1.77502	1.50156	1.13846	1.37875	0.160099
2022/10/30 02:51:06	2022/11/18 02:53:25	27.9434	12.2124	7.36618	10.7186		3.26802	1.64227	1.03563	1.76615	1.92802	0.474326		12.8074	8.24418	11.6864	10.4322		1.51208	2.26762	2.15524	1.79914	1.93352	0.172349		13.7156	12.6241	26.7575	9.63681		0.81571	1.81827	3.55016	2.12203	2.07654	0.56495		16.0663	20.8189	8.45829	21.3996		1.09995	1.78347	1.50156	1.13846	1.38086	0.161846
2022/10/30 02:56:06	2022/11/18 02:58:25	27.9434	12.2894	7.36618	10.7186		3.26802	1.71927	1.03563	1.76615	1.94727	0.470838		12.8074	8.25548	11.6873	10.4338		1.51208	2.27892	2.15608	1.80072	1.93695	0.174173		13.7156	12.6494	26.8087	9.63681		0.81571	1.84362	3.60142	2.12203	2.09569	0.575167		16.0663	20.8189	8.45829	21.4252		1.09995	1.78347	1.50156	1.16409	1.38727	0.158745
2022/10/30 03:01:06	2022/11/18 03:03:25	27.9434	12.3378	7.36618	10.7186		3.26802	1.76771	1.03563	1.76615	1.95938	0.469035		12.8074	8.25548	11.7082	10.444		1.51208	2.27892	2.177	1.8109	1.94472	0.175767		13.7156	12.6601	26.9123	9.63681		0.81571	1.85426	3.70499	2.12203	2.12425	0.597489		16.0663	20.8189	8.45829	21.5299		1.09995	1.78347	1.50156	1.26884	1.41345	0.148288
2022/10/30 03:06:06	2022/11/18 03:08:25	27.9434	12.3385	7.36618	10.7186		3.26802	1.76835	1.03563	1.76615	1.95954	0.469014		12.8074	8.25548	11.7376	10.4601		1.51208	2.27892	2.20647	1.827	1.95612	0.178119		13.7158	12.6601	26.9973	9.63681		0.81598	1.85426	3.79002	2.12203	2.14557	0.616268		16.0663	20.8299	8.45829	21.5843		1.09995	1.79454	1.50156	1.32321	1.42981	0.146727
2022/10/30 03:11:06	2022/11/18 03:13:25	27.9434	12.3385	7.36618	10.7186		3.26802	1.76835	1.03563	1.76615	1.95954	0.469014		12.8074	8.25548	11.7659	10.5176		1.51208	2.27892	2.23474	1.88453	1.97757	0.178485		13.7398	12.6601	27.0057	9.63681		0.83994	1.85426	3.79838	2.12203	2.15365	0.613841		16.0738	20.947	8.45829	21.5843		1.10741	1.91158	1.50156	1.32321	1.46094	0.17046
2022/10/30 03:16:06	2022/11/18 03:18:25	27.9434	12.3385	7.36618	10.7216		3.26802	1.76835	1.03563	1.7692	1.9603	0.46891		12.8074	8.25548	11.7734	10.5672		1.51208	2.27892	2.24227	1.93413	1.99185	0.17763		13.7407	12.6601	27.0057	9.63681		0.84088	1.85426	3.79838	2.12203	2.15389	0.613673		16.1104	20.9632	8.46139	21.5843		1.14397	1.92779	1.50466	1.32321	1.47491	0.167958
2022/10/30 03:21:06	2022/11/18 03:23:25	27.9434	12.3385	7.36618	10.7836		3.26802	1.76835	1.03563	1.83122	1.9758	0.467056		12.8074	8.25548	11.7734	10.5702		1.51208	2.27892	2.24227	1.93706	1.99258	0.177552		13.7407	12.6601	27.0057	9.63681		0.84088	1.85426	3.79838	2.12203	2.15389	0.613673		16.1498	20.9632	8.46853	21.5843		1.18345	1.92779	1.5118	1.32321	1.48656	0.16173
2022/10/30 03:26:06	2022/11/18 03:28:25	27.9648	12.3385	7.36618	10.8683		3.28943	1.76835	1.03563	1.9159	2.00233	0.470227		12.8074	8.25548	11.7734	10.5708		1.51208	2.27892	2.24227	1.93766	1.99273	0.177537		13.7407	12.6601	27.0057	9.63681		0.84088	1.85426	3.79838	2.12203	2.15389	0.613673		16.1849	20.9632	8.47568	21.5843		1.21848	1.92779	1.51895	1.32321	1.49711	0.156482
2022/10/30 03:31:06	2022/11/18 03:33:25	28.0199	12.3385	7.36618	10.953		3.34452	1.76835	1.03563	2.00059	2.03727	0.481824		12.8074	8.25548	11.7734	10.5794		1.51208	2.27892	2.24227	1.94631	1.99489	0.177326		13.7407	12.6601	27.0057	9.63681		0.84088	1.85426	3.79838	2.12203	2.15389	0.613673		16.1903	20.9632	8.48218	21.5843		1.22392	1.92779	1.52546	1.32321	1.50009	0.155758
2022/10/30 03:36:06	2022/11/18 03:38:25	28.0754	12.3385	7.36618	11.022		3.40002	1.76835	1.03563	2.06961	2.0684	0.494121		12.8074	8.25548	11.7734	10.5794		1.51208	2.27892	2.24227	1.94631	1.99489	0.177326		13.7407	12.6601	27.0301	9.63681		0.84088	1.85426	3.82281	2.12203	2.15999	0.619135		16.1903	20.9732	8.48337	21.5843		1.22392	1.93782	1.52664	1.32321	1.5029	0.158071
2022/10/30 03:41:06	2022/11/18 03:43:25	28.1305	12.3385	7.36618	11.0306		3.45516	1.76835	1.03563	2.07817	2.08433	0.506527		12.8074	8.25548	11.7734	10.5794		1.51208	2.27892	2.24227	1.94631	1.99489	0.177326		13.7407	12.6601	27.1479	9.63681		0.84088	1.85426	3.94057	2.12203	2.18943	0.645624		16.1903	21.0659	8.48337	21.5843		1.22392	2.03047	1.52664	1.32321	1.52606	0.179552
2022/10/30 03:46:06	2022/11/18 03:48:25	28.1661	12.3385	7.36618	11.0327		3.49069	1.76835	1.03563	2.08032	2.09375	0.514549		12.8249	8.25932	11.7734	10.5794		1.52964	2.28276	2.24227	1.94631	2.00024	0.17387		13.7407	12.6601	27.1489	9.63681		0.84088	1.85426	3.94161	2.12203	2.18969	0.645859		16.1903	21.1692	8.48337	21.5843		1.22392	2.13381	1.52664	1.32321	1.55189	0.203946
2022/10/30 03:51:06	2022/11/18 03:53:25	28.2508	12.3686	7.36618	11.0327		3.57541	1.79849	1.03563	2.08032	2.12246	0.532212		12.983	8.28867	11.7771	10.5794		1.68774	2.31212	2.24593	1.94631	2.04802	0.144066		13.7407	12.671	27.1489	9.63681		0.84088	1.86525	3.94161	2.12203	2.19244	0.645389		16.1903	21.2898	8.48337	21.5843		1.22392	2.25445	1.52664	1.32321	1.58205	0.232817
2022/10/30 03:56:06	2022/11/18 03:58:25	28.2508	12.444	7.36618	11.0327		3.57541	1.87386	1.03563	2.08032	2.1413	0.528711		13.1712	8.42272	11.8092	10.5817		1.87592	2.44616	2.27798	1.94855	2.13715	0.135133		13.7407	12.6969	27.1489	9.63681		0.84088	1.89109	3.94161	2.12203	2.1989	0.644329		16.1903	21.323	8.48337	21.5843		1.22392	2.28766	1.52664	1.32321	1.59036	0.240821
2022/10/30 04:01:06	2022/11/18 04:03:25	28.2508	12.5091	7.36618	11.0327		3.57541	1.93896	1.03563	2.08032	2.15758	0.526211		13.2542	8.4512	11.8472	10.5884		1.95892	2.47465	2.31603	1.95529	2.17622	0.130586		13.7407	12.6969	27.1489	9.63681		0.84088	1.89109	3.94161	2.12203	2.1989	0.644329		16.1903	21.323	8.48337	21.5856		1.22392	2.28766	1.52664	1.32452	1.59068	0.2407
2022/10/30 04:06:06	2022/11/18 04:08:25	28.2508	12.5174	7.36618	11.0327		3.57541	1.94728	1.03563	2.08032	2.15966	0.525927		13.2542	8.45432	11.8852	10.6945		1.95892	2.47777	2.35408	2.06143	2.21305	0.121633		13.7407	12.7341	27.1489	9.64582		0.84088	1.92834	3.94161	2.13104	2.21047	0.642815		16.191	21.323	8.48337	21.6417		1.22466	2.28766	1.52664	1.38058	1.60488	0.235794
2022/10/30 04:11:06	2022/11/18 04:13:25	28.2508	12.5174	7.36618	11.0327		3.57541	1.94728	1.03563	2.08032	2.15966	0.525927		13.2542	8.45432	11.9232	10.6955		1.95892	2.47777	2.39208	2.06242	2.2228	0.125505		13.7407	12.7716	27.1489	9.65392		0.84088	1.96585	3.94161	2.13914	2.22187	0.64142		16.2066	21.323	8.48337	21.6474		1.24027	2.28766	1.52664	1.38631	1.61022	0.233258
2022/10/30 04:16:06	2022/11/18 04:18:25	28.2508	12.5174	7.36618	11.0327		3.57541	1.94728	1.03563	2.08032	2.15966	0.525927		13.2542	8.45432	11.9412	10.6955		1.95892	2.47777	2.40998	2.06242	2.22727	0.12758		13.753	12.7716	27.1489	9.65392		0.85312	1.96585	3.94161	2.13914	2.22493	0.639227		16.2147	21.323	8.48337	21.6474		1.24827	2.28766	1.52664	1.38631	1.61222	0.232206
2022/10/30 04:21:06	2022/11/18 04:23:25	28.2508	12.5174	7.36618	11.0327		3.57541	1.94728	1.03563	2.08032	2.15966	0.525927		13.2542	8.45432	11.9739	10.6955		1.95892	2.47777	2.44277	2.06242	2.23547	0.13169		13.7779	12.772	27.1489	9.65392		0.87801	1.96617	3.94161	2.13914	2.23123	0.63478		16.2435	21.323	8.48337	21.6474		1.27714	2.28766	1.52664	1.38631	1.61944	0.228519
2022/10/30 04:26:06	2022/11/18 04:28:25	28.2508	12.5174	7.36618	11.0327		3.57541	1.94728	1.03563	2.08032	2.15966	0.525927		13.2542	8.45432	12.0099	10.6955		1.95892	2.47777	2.47877	2.06242	2.24447	0.136627		13.8027	12.8313	27.1489	9.65392		0.9029	2.02553	3.94161	2.13914	2.25229	0.628416		16.2773	21.323	8.48337	21.6474		1.3109	2.28766	1.52664	1.38631	1.62788	0.224424
2022/10/30 04:31:06	2022/11/18 04:33:25	28.2508	12.5174	7.36618	11.0327		3.57541	1.94728	1.03563	2.08032	2.15966	0.525927		13.2542	8.45432	12.0116	10.6955		1.95892	2.47777	2.48047	2.06242	2.24489	0.136871		13.8276	12.858	27.1489	9.65392		0.92779	2.05218	3.94161	2.13914	2.26518	0.623183		16.311	21.323	8.48337	21.6474		1.34466	2.28766	1.52664	1.38631	1.63632	0.220576
2022/10/30 04:36:06	2022/11/18 04:38:25	28.2508	12.5174	7.36618	11.0327		3.57541	1.94728	1.03563	2.08032	2.15966	0.525927		13.2542	8.45432	12.0116	10.6962		1.95892	2.47777	2.48047	2.06308	2.24506	0.136798		13.8525	12.858	27.1489	9.65392		0.95268	2.05218	3.94161	2.13914	2.2714	0.618747		16.3448	21.323	8.48337	21.6474		1.37842	2.28766	1.52664	1.38631	1.64476	0.216988
2022/10/30 04:41:06	2022/11/18 04:43:25	28.2508	12.5174	7.36618	11.0327		3.57541	1.94728	1.03563	2.08032	2.15966	0.525927		13.2542	8.45432	12.0116	10.7058		1.95892	2.47777	2.48047	2.07268	2.24746	0.13575		13.8774	12.858	27.1489	9.65392		0.97757	2.05218	3.94161	2.13914	2.27762	0.614342		16.3725	21.323	8.48337	21.6474		1.40607	2.28766	1.52664	1.38631	1.65167	0.214253
2022/10/30 04:46:06	2022/11/18 04:48:25	28.2508	12.5174	7.36618	11.0327		3.57541	1.94728	1.03563	2.08032	2.15966	0.525927		13.2542	8.45432	12.0116	10.7073		1.95892	2.47777	2.48047	2.0742	2.24784	0.135588		13.9023	12.8697	27.1489	9.65392		1.00246	2.06386	3.94161	2.13914	2.28677	0.609606		16.3751	21.323	8.48337	21.6474		1.40874	2.28766	1.52664	1.38631	1.65234	0.213999
2022/10/30 04:51:06	2022/11/18 04:53:25	28.2508	12.5174	7.36618	11.0327		3.57541	1.94728	1.03563	2.08032	2.15966	0.525927		13.2542	8.45432	12.0116	10.7073		1.95892	2.47777	2.48047	2.0742	2.24784	0.135588		13.9272	12.9045	27.1489	9.65392		1.02736	2.09871	3.94161	2.13914	2.3017	0.604213		16.4044	21.323	8.48337	21.6474		1.43799	2.28766	1.52664	1.38631	1.65965	0.211332
2022/10/30 04:56:06	2022/11/18 04:58:25	28.2508	12.5174	7.36618	11.0363		3.57541	1.94728	1.03563	2.08387	2.16055	0.525884		13.2542	8.48725	12.0116	10.7073		1.95892	2.5107	2.48047	2.0742	2.25607	0.140405		13.9521	12.94	27.1489	9.65521		1.05225	2.13419	3.94161	2.14042	2.31712	0.598857		16.4266	21.3234	8.48337	21.6474		1.4602	2.28798	1.52664	1.38631	1.66528	0.209535
2022/10/30 05:01:06	2022/11/18 05:03:25	28.2508	12.5174	7.36618	11.121		3.57541	1.94728	1.03563	2.16856	2.18172	0.52528		13.2542	8.656	12.0116	10.7073		1.95892	2.67945	2.48047	2.0742	2.29826	0.169277		13.9699	12.9631	27.1489	9.65696		1.07004	2.1573	3.94161	2.14217	2.32778	0.59511		16.4266	21.3656	8.48337	21.6474		1.4602	2.33021	1.52664	1.38631	1.67584	0.219998
2022/10/30 05:06:06	2022/11/18 05:08:25	28.2508	12.5174	7.36618	11.2391		3.57541	1.94728	1.03563	2.28667	2.21125	0.525863		13.2542	8.68804	12.0375	10.7073		1.95892	2.71148	2.50632	2.0742	2.31273	0.177614		13.9706	12.9648	27.1519	9.65696		1.07079	2.159	3.94461	2.14217	2.32914	0.595615		16.4266	21.4371	8.48337	21.6474		1.4602	2.40174	1.52664	1.38631	1.69372	0.23774
2022/10/30 05:11:06	2022/11/18 05:13:25	28.2508	12.5174	7.36618	11.2897		3.57541	1.94728	1.03563	2.33735	2.22392	0.526621		13.2542	8.68804	12.0634	10.7177		1.95892	2.71148	2.53225	2.0846	2.32181	0.178906		13.9706	12.9757	27.1915	9.65696		1.07079	2.16993	3.98416	2.14217	2.34176	0.604304		16.4266	21.5087	8.48337	21.6474		1.4602	2.47327	1.52664	1.38631	1.7116	0.255501
2022/10/30 05:16:06	2022/11/18 05:18:25	28.2993	12.5174	7.36618	11.2897		3.62391	1.94728	1.03563	2.33735	2.23604	0.53703		13.2542	8.68804	12.1079	10.7854		1.95892	2.71148	2.57674	2.15225	2.34985	0.176571		13.9706	13.0452	27.2418	9.65696		1.07079	2.23941	4.03452	2.14217	2.37172	0.614242		16.4266	21.5751	8.48337	21.6474		1.4602	2.53967	1.52664	1.38631	1.7282	0.272002
2022/10/30 05:21:06	2022/11/18 05:23:25	28.4139	12.5174	7.36618	11.2897		3.73854	1.94728	1.03563	2.33735	2.2647	0.561906		13.2542	8.68804	12.1504	10.9614		1.95892	2.71148	2.61923	2.32829	2.40448	0.169484		13.9706	13.1837	27.2922	9.65696		1.07079	2.37789	4.08487	2.14217	2.41893	0.623907		16.4266	21.5889	8.48337	21.6474		1.4602	2.55349	1.52664	1.38631	1.73166	0.275438
2022/10/30 05:26:06	2022/11/18 05:28:25	28.526	12.5174	7.36618	11.2897		3.85064	1.94728	1.03563	2.33735	2.29272	0.586566		13.2542	8.69621	12.1587	10.9927		1.95892	2.71965	2.62749	2.3596	2.41641	0.170547		13.9706	13.3222	27.3425	9.65696		1.07079	2.51636	4.13516	2.14217	2.46612	0.635092		16.3643	21.5889	8.48337	21.6629		1.39795	2.55349	1.52664	1.40185	1.71998	0.279438
2022/10/30 05:31:06	2022/11/18 05:33:25	28.565	12.5174	7.36622	11.2897		3.88965	1.94728	1.03567	2.33735	2.30249	0.59521		13.2542	8.69621	12.1768	10.9936		1.95892	2.71965	2.64567	2.36054	2.42119	0.172444		13.9706	13.4194	27.3653	9.65696		1.07079	2.61361	4.15797	2.14217	2.49614	0.641118		16.4614	21.5889	8.48355	21.6912		1.49507	2.55349	1.52682	1.4301	1.75137	0.26813
2022/10/30 05:36:06	2022/11/18 05:38:25	28.594	12.5174	7.36998	11.2897		3.91862	1.94728	1.03943	2.33735	2.31067	0.600993		13.2593	8.7735	12.1963	10.9951		1.96399	2.79694	2.66512	2.36197	2.447	0.184969		13.9706	13.423	27.3653	9.65696		1.07079	2.61722	4.15797	2.14217	2.49704	0.641174		16.554	21.5889	8.48959	21.6912		1.58764	2.55349	1.53286	1.4301	1.77602	0.261204
2022/10/30 05:41:06	2022/11/18 05:43:25	28.5949	12.5174	7.37613	11.2897		3.91948	1.94728	1.04558	2.33735	2.31242	0.600102		13.2757	8.77565	12.2157	10.9963		1.98044	2.79909	2.68458	2.3632	2.45683	0.183649		13.9706	13.423	27.3701	9.65696		1.07079	2.61722	4.16276	2.14217	2.49824	0.642208		16.581	21.5889	8.49601	21.6912		1.61462	2.55349	1.53928	1.4301	1.78437	0.259155
2022/10/30 05:46:06	2022/11/18 05:48:25	28.5949	12.5174	7.38058	11.2897		3.91948	1.94728	1.05003	2.33735	2.31353	0.599321		13.2926	8.79046	12.2258	10.9965		1.99732	2.8139	2.69466	2.36336	2.46731	0.183373		13.9706	13.423	27.4233	9.65696		1.07079	2.61722	4.21598	2.14217	2.51154	0.653738		16.6036	21.5889	8.50821	21.7005		1.63722	2.55349	1.55149	1.43941	1.7954	0.255921
2022/10/30 05:51:06	2022/11/18 05:53:25	28.5949	12.5174	7.38078	11.2897		3.91948	1.94728	1.05023	2.33735	2.31358	0.599286		13.3048	8.80218	12.2319	10.9965		2.00956	2.82563	2.7007	2.36336	2.47481	0.183252		13.9706	13.423	27.4891	9.65696		1.07079	2.61722	4.28179	2.14217	2.52799	0.668086		16.6122	21.5889	8.52796	21.7465		1.6458	2.55349	1.57123	1.48544	1.81399	0.248668
2022/10/30 05:56:06	2022/11/18 05:58:25	28.5949	12.5174	7.38078	11.2897		3.91948	1.94728	1.05023	2.33735	2.31358	0.599286		13.3054	8.80702	12.2435	10.9965		2.01012	2.83047	2.71232	2.36336	2.47907	0.18511		13.9706	13.423	27.5549	9.65696		1.07079	2.61722	4.34759	2.14217	2.54444	0.682527		16.6122	21.5889	8.5477	21.7963		1.6458	2.55349	1.59097	1.53522	1.83137	0.241763
2022/10/30 06:01:06	2022/11/18 06:03:25	28.5949	12.5174	7.38078	11.2897		3.91948	1.94728	1.05023	2.33735	2.31358	0.599286		13.3054	8.90819	12.2495	10.9965		2.01012	2.93164	2.71829	2.36336	2.50585	0.202582		13.9706	13.423	27.6013	9.65696		1.07079	2.61722	4.39397	2.14217	2.55604	0.692759		16.6331	21.5889	8.56394	21.8372		1.66675	2.55349	1.60721	1.57609	1.85089	0.234955
2022/10/30 06:06:06	2022/11/18 06:08:25	28.5949	12.5174	7.38078	11.2897		3.91948	1.94728	1.05023	2.33735	2.31358	0.599286		13.3054	8.90819	12.2509	10.9965		2.01012	2.93164	2.71977	2.36336	2.50622	0.202712		13.9706	13.4238	27.6837	9.65696		1.07079	2.61801	4.47638	2.14217	2.57684	0.711048		16.6478	21.5898	8.56556	21.8629		1.68139	2.55437	1.60883	1.60177	1.86159	0.231626
2022/10/30 06:11:06	2022/11/18 06:13:25	28.5949	12.5174	7.38078	11.2897		3.91948	1.94728	1.05023	2.33735	2.31358	0.599286		13.6377	8.90819	12.2518	10.9965		2.34241	2.93164	2.72063	2.36336	2.58951	0.143308		13.9706	13.4271	27.7746	9.65696		1.07079	2.62127	4.56733	2.14217	2.60039	0.731376		16.7681	21.6135	8.56556	21.887		1.80175	2.57808	1.60883	1.62591	1.90364	0.229001
2022/10/30 06:16:06	2022/11/18 06:18:25	28.5949	12.5178	7.38078	11.2924		3.91948	1.94765	1.05023	2.34002	2.31434	0.599276		14.1192	8.90819	12.2527	10.9965		2.82389	2.93164	2.72152	2.36336	2.7101	0.123284		13.9706	13.4305	27.7746	9.65696		1.07079	2.62471	4.56733	2.14217	2.60125	0.731385		16.7681	21.6472	8.56556	21.9243		1.80175	2.61184	1.60883	1.66324	1.92142	0.233696
2022/10/30 06:21:06	2022/11/18 06:23:25	28.5949	12.617	7.38078	11.3562		3.91948	2.04685	1.05023	2.40385	2.3551	0.594935		14.1192	8.90819	12.2527	10.9965		2.82389	2.93164	2.72152	2.36336	2.7101	0.123284		13.9706	13.4337	27.7746	9.65696		1.07079	2.62792	4.56733	2.14217	2.60205	0.731394		16.7681	21.681	8.56556	21.9616		1.80175	2.6456	1.60883	1.70056	1.93919	0.238744
2022/10/30 06:26:06	2022/11/18 06:28:25	28.5949	12.7895	7.38078	11.4453		3.91948	2.21939	1.05023	2.49286	2.42049	0.589511		14.1192	8.90819	12.2527	10.9965		2.82389	2.93164	2.72152	2.36336	2.7101	0.123284		13.9706	13.4435	27.7746	9.65696		1.07079	2.63772	4.56733	2.14217	2.6045	0.731427		16.7681	21.7147	8.56556	22.099		1.80175	2.67936	1.60883	1.83789	1.98196	0.237841
2022/10/30 06:31:06	2022/11/18 06:33:25	28.5949	12.8453	7.38078	11.4834		3.91948	2.27518	1.05023	2.53105	2.44398	0.588481		14.1192	8.90819	12.2527	10.9965		2.82389	2.93164	2.72152	2.36336	2.7101	0.123284		13.9715	13.4962	27.7746	9.65696		1.07166	2.6904	4.56733	2.14217	2.61789	0.731591		16.7681	21.7485	8.56556	22.1362		1.80175	2.71312	1.60883	1.87515	1.99971	0.244343
2022/10/30 06:36:06	2022/11/18 06:38:25	28.6251	12.8544	7.38078	11.4834		3.94966	2.28429	1.05023	2.53105	2.45381	0.594581		14.1192	8.90819	12.2527	10.9965		2.82389	2.93164	2.72152	2.36336	2.7101	0.123284		14.0162	13.5546	27.7746	9.65696		1.11637	2.74876	4.56733	2.14217	2.64366	0.724319		16.7681	21.7823	8.56556	22.1506		1.80175	2.74688	1.60883	1.88954	2.01175	0.251958
2022/10/30 06:41:06	2022/11/18 06:43:25	28.683	12.8548	7.38078	11.4834		4.00764	2.28468	1.05023	2.53105	2.4684	0.606778		14.1192	8.90819	12.2527	10.9965		2.82389	2.93164	2.72152	2.36336	2.7101	0.123284		14.0855	13.6129	27.7746	9.65696		1.18561	2.80713	4.56733	2.14217	2.67556	0.713008		16.7681	21.816	8.56556	22.1506		1.80175	2.78064	1.60883	1.88954	2.02019	0.260174
2022/10/30 06:46:06	2022/11/18 06:48:25	28.7169	12.8548	7.38078	11.4834		4.04151	2.28468	1.05023	2.53105	2.47687	0.613955		14.1192	8.90819	12.2527	11.0969		2.82389	2.93164	2.72152	2.46382	2.73521	0.10012		14.1547	13.6673	27.7746	9.65696		1.25484	2.86146	4.56733	2.14217	2.70645	0.701931		16.7681	21.8463	8.56556	22.1506		1.80175	2.81091	1.60883	1.88954	2.02776	0.267552
2022/10/30 06:51:06	2022/11/18 06:53:25	28.734	12.8548	7.38078	11.4834		4.05859	2.28468	1.05023	2.53105	2.48114	0.617586		14.1192	8.90819	12.2527	11.1043		2.82389	2.93164	2.72152	2.47122	2.73706	0.0984519		14.2206	13.7638	27.7746	9.65696		1.32079	2.95804	4.56733	2.14217	2.74708	0.692702		16.7681	21.8692	8.56556	22.1506		1.80175	2.83378	1.60883	1.88954	2.03348	0.273133
2022/10/30 06:56:06	2022/11/18 06:58:25	28.734	12.8548	7.38078	11.4834		4.05859	2.28468	1.05023	2.53105	2.48114	0.617586		14.1192	8.90819	12.2527	11.1141		2.82389	2.93164	2.72152	2.48095	2.7395	0.0962683		14.2372	14.051	27.7746	9.65696		1.33735	3.24523	4.56733	2.14217	2.82302	0.700693		16.7681	21.9122	8.56556	22.1506		1.80175	2.87681	1.60883	1.88954	2.04423	0.28365
2022/10/30 07:01:06	2022/11/18 07:03:25	28.734	12.8548	7.38078	11.4834		4.05859	2.28468	1.05023	2.53105	2.48114	0.617586		14.1192	8.90819	12.2527	11.1219		2.82389	2.93164	2.72152	2.48879	2.74146	0.0945176		14.2372	14.2662	27.7746	9.65696		1.33735	3.46043	4.56733	2.14217	2.87682	0.713448		16.7686	21.9124	8.56556	22.1506		1.80223	2.87704	1.60883	1.88954	2.04441	0.283672
2022/10/30 07:06:06	2022/11/18 07:08:25	28.734	12.8548	7.38078	11.4834		4.05859	2.28468	1.05023	2.53105	2.48114	0.617586		14.1192	8.90819	12.2527	11.1226		2.82389	2.93164	2.72152	2.48949	2.74163	0.0943617		14.2372	14.2764	27.7746	9.65696		1.33735	3.47056	4.56733	2.14217	2.87935	0.714143		16.7973	21.9124	8.56556	22.1506		1.83091	2.87704	1.60883	1.88954	2.05158	0.281715
2022/10/30 07:11:06	2022/11/18 07:13:25	28.734	12.8548	7.38078	11.4834		4.05859	2.28468	1.05023	2.53105	2.48114	0.617586		14.1192	8.90819	12.2527	11.1226		2.82389	2.93164	2.72152	2.48949	2.74163	0.0943617		14.2372	14.2764	27.7746	9.65696		1.33735	3.47056	4.56733	2.14217	2.87935	0.714143		16.8425	21.9124	8.56556	22.1506		1.87611	2.87704	1.60883	1.88954	2.06288	0.278978
2022/10/30 07:16:06	2022/11/18 07:18:25	28.734	12.8548	7.38078	11.4834		4.05859	2.28468	1.05023	2.53105	2.48114	0.617586		14.1192	8.90819	12.2527	11.1226		2.82389	2.93164	2.72152	2.48949	2.74163	0.0943617		14.2372	14.2764	27.7746	9.65696		1.33735	3.47056	4.56733	2.14217	2.87935	0.714143		16.8877	21.9124	8.56556	22.1506		1.92132	2.87704	1.60883	1.88954	2.07418	0.276675
2022/10/30 07:21:06	2022/11/18 07:23:25	28.734	12.8548	7.38078	11.4834		4.05859	2.28468	1.05023	2.53105	2.48114	0.617586		14.1192	8.90819	12.2527	11.1226		2.82389	2.93164	2.72152	2.48949	2.74163	0.0943617		14.2372	14.2764	27.7746	9.66104		1.33735	3.47056	4.56733	2.14625	2.88037	0.713793		16.913	21.9124	8.56556	22.1506		1.94667	2.87704	1.60883	1.88954	2.08052	0.275578
2022/10/30 07:26:06	2022/11/18 07:28:25	28.734	12.8548	7.38078	11.4834		4.05859	2.28468	1.05023	2.53105	2.48114	0.617586		14.1192	8.90819	12.2527	11.1226		2.82389	2.93164	2.72152	2.48949	2.74163	0.0943617		14.2372	14.2764	27.7746	9.66501		1.33735	3.47056	4.56733	2.15022	2.88137	0.713453		16.978	21.9124	8.56556	22.1506		2.01163	2.87704	1.60883	1.88954	2.09676	0.273419
2022/10/30 07:31:06	2022/11/18 07:33:25	28.734	12.8548	7.38078	11.4834		4.05859	2.28468	1.05023	2.53105	2.48114	0.617586		14.1192	8.90819	12.2527	11.1226		2.82389	2.93164	2.72152	2.48949	2.74163	0.0943617		14.2372	14.2764	27.7746	9.66501		1.33735	3.47056	4.56733	2.15022	2.88137	0.713453		16.9839	21.9124	8.56556	22.1506		2.01749	2.87704	1.60883	1.88954	2.09823	0.273271
2022/10/30 07:36:06	2022/11/18 07:38:25	28.734	12.8548	7.38078	11.4834		4.05859	2.28468	1.05023	2.53105	2.48114	0.617586		14.1192	8.90819	12.2527	11.1226		2.82389	2.93164	2.72152	2.48949	2.74163	0.0943617		14.2372	14.2764	27.7746	9.66501		1.33735	3.47056	4.56733	2.15022	2.88137	0.713453		16.9839	21.9124	8.56556	22.1506		2.01749	2.87704	1.60883	1.88954	2.09823	0.273271
2022/10/30 07:41:06	2022/11/18 07:43:25	28.734	12.8548	7.38078	11.4834		4.05859	2.28468	1.05023	2.53105	2.48114	0.617586		14.1192	8.90819	12.2527	11.1226		2.82389	2.93164	2.72152	2.48949	2.74163	0.0943617		14.2372	14.2764	27.7746	9.66501		1.33735	3.47056	4.56733	2.15022	2.88137	0.713453		16.9839	21.9124	8.56556	22.1506		2.01749	2.87704	1.60883	1.88954	2.09823	0.273271
2022/10/30 07:46:06	2022/11/18 07:48:25	28.734	12.8729	7.38078	11.4834		4.05859	2.30281	1.05023	2.53105	2.48567	0.617122		14.1192	8.90819	12.2527	11.1226		2.82389	2.93164	2.72152	2.48949	2.74163	0.0943617		14.2372	14.2764	27.7746	9.66501		1.33735	3.47056	4.56733	2.15022	2.88137	0.713453		16.9839	21.9124	8.56556	22.1506		2.01749	2.87704	1.60883	1.88954	2.09823	0.273271
2022/10/30 07:51:06	2022/11/18 07:53:25	28.734	12.91	7.38078	11.4834		4.05859	2.33982	1.05023	2.53105	2.49492	0.616277		14.1192	8.90819	12.2527	11.1226		2.82389	2.93164	2.72152	2.48949	2.74163	0.0943617		14.2372	14.2764	27.7746	9.66501		1.33735	3.47056	4.56733	2.15022	2.88137	0.713453		16.9839	21.9124	8.56556	22.1506		2.01749	2.87704	1.60883	1.88954	2.09823	0.273271
2022/10/30 07:56:06	2022/11/18 07:58:25	28.734	12.9182	7.38078	11.4834		4.05859	2.34811	1.05023	2.53105	2.49699	0.616106		14.1192	8.90819	12.2527	11.1226		2.82389	2.93164	2.72152	2.48949	2.74163	0.0943617		14.2372	14.2764	27.7746	9.66501		1.33735	3.47056	4.56733	2.15022	2.88137	0.713453		16.9839	21.9124	8.56556	22.1506		2.01749	2.87704	1.60883	1.88954	2.09823	0.273271
2022/10/30 08:01:06	2022/11/18 08:03:25	28.734	12.9182	7.38078	11.4834		4.05859	2.34811	1.05023	2.53105	2.49699	0.616106		14.1192	8.90819	12.2527	11.1226		2.82389	2.93164	2.72152	2.48949	2.74163	0.0943617		14.2372	14.2764	27.7746	9.66501		1.33735	3.47056	4.56733	2.15022	2.88137	0.713453		16.9839	21.9124	8.56556	22.1506		2.01749	2.87704	1.60883	1.88954	2.09823	0.273271
2022/10/30 08:06:06	2022/11/18 08:08:25	28.734	12.9182	7.38078	11.4834		4.05859	2.34811	1.05023	2.53105	2.49699	0.616106		14.1192	8.90819	12.2527	11.1226		2.82389	2.93164	2.72152	2.48949	2.74163	0.0943617		14.2372	14.2764	27.7746	9.66501		1.33735	3.47056	4.56733	2.15022	2.88137	0.713453		16.9839	21.9124	8.56556	22.1506		2.01749	2.87704	1.60883	1.88954	2.09823	0.273271
2022/10/30 08:11:06	2022/11/18 08:13:25	28.734	12.9182	7.38078	11.4834		4.05859	2.34811	1.05023	2.53105	2.49699	0.616106		14.1192	8.90819	12.2527	11.1226		2.82389	2.93164	2.72152	2.48949	2.74163	0.0943617		14.2372	14.2764	27.7746	9.66501		1.33735	3.47056	4.56733	2.15022	2.88137	0.713453		16.9839	21.9124	8.56556	22.1506		2.01749	2.87704	1.60883	1.88954	2.09823	0.273271
2022/10/30 08:16:06	2022/11/18 08:18:25	28.734	12.9182	7.38078	11.4834		4.05859	2.34811	1.05023	2.53105	2.49699	0.616106		14.1192	8.90819	12.2537	11.1226		2.82389	2.93164	2.72251	2.48949	2.74188	0.0943445		14.2372	14.2764	27.7746	9.66501		1.33735	3.47056	4.56733	2.15022	2.88137	0.713453		16.9839	21.9124	8.56556	22.1506		2.01749	2.87704	1.60883	1.88954	2.09823	0.273271
2022/10/30 08:21:06	2022/11/18 08:23:25	28.734	12.9182	7.38078	11.4834		4.05859	2.34811	1.05023	2.53105	2.49699	0.616106		14.1192	8.90819	12.2786	11.1226		2.82389	2.93164	2.74746	2.48949	2.74812	0.0941234		14.2372	14.2764	27.7987	9.66501		1.33735	3.47056	4.59136	2.15022	2.88737	0.718195		16.9839	21.9124	8.56556	22.1506		2.01749	2.87704	1.60883	1.88954	2.09823	0.273271
2022/10/30 08:26:06	2022/11/18 08:28:25	28.734	12.9182	7.38078	11.4834		4.05859	2.34811	1.05023	2.53105	2.49699	0.616106		14.1192	8.90819	12.2909	11.1226		2.82389	2.93164	2.75973	2.48949	2.75118	0.0941662		14.2372	14.2764	27.8479	9.66501		1.33735	3.47056	4.64057	2.15022	2.89968	0.727963		16.9839	21.9124	8.56556	22.1506		2.01749	2.87704	1.60883	1.88954	2.09823	0.273271
2022/10/30 08:31:06	2022/11/18 08:33:25	28.734	12.9182	7.38078	11.4834		4.05859	2.34811	1.05023	2.53105	2.49699	0.616106		14.1192	8.90819	12.2909	11.1226		2.82389	2.93164	2.75973	2.48949	2.75118	0.0941662		14.2372	14.2764	27.8971	9.6651		1.33735	3.47056	4.68978	2.15031	2.912	0.7378		16.9839	21.9124	8.56556	22.1506		2.01749	2.87704	1.60883	1.88954	2.09823	0.273271
2022/10/30 08:36:06	2022/11/18 08:38:25	28.734	12.9182	7.38078	11.4834		4.05859	2.34811	1.05023	2.53105	2.49699	0.616106		14.1192	8.90819	12.2909	11.1226		2.82389	2.93164	2.75973	2.48949	2.75118	0.0941662		14.2372	14.2817	27.9444	9.67345		1.33735	3.47585	4.73704	2.15867	2.92723	0.746927		16.9839	21.9124	8.56556	22.177		2.01749	2.87706	1.60883	1.9159	2.10482	0.271673
2022/10/30 08:41:06	2022/11/18 08:43:25	28.734	12.9513	7.38078	11.4834		4.05859	2.38117	1.05023	2.53105	2.50526	0.615496		14.1192	8.90819	12.2909	11.1226		2.82389	2.93164	2.75973	2.48949	2.75118	0.0941662		14.2372	14.3492	27.957	9.68671		1.33735	3.54341	4.74973	2.17193	2.9506	0.752618		16.9839	21.9658	8.56556	22.1959		2.01749	2.93038	1.60883	1.93485	2.12289	0.283249
2022/10/30 08:46:06	2022/11/18 08:48:25	28.734	12.9622	7.38078	11.4834		4.05859	2.39209	1.05023	2.53105	2.50799	0.615318		14.1192	8.90819	12.2909	11.1226		2.82389	2.93164	2.75973	2.48949	2.75118	0.0941662		14.2372	14.4348	27.9632	9.69327		1.33735	3.62896	4.75591	2.17849	2.97518	0.759146		16.9839	22.0693	8.56556	22.2418		2.01749	3.03395	1.60883	1.98067	2.16024	0.305511
2022/10/30 08:51:06	2022/11/18 08:53:25	28.734	12.967	7.38078	11.4834		4.05859	2.39691	1.05023	2.53105	2.50919	0.615244		14.1192	8.90819	12.2909	11.1226		2.82389	2.93164	2.75973	2.48949	2.75118	0.0941662		14.2372	14.4855	27.9882	9.69853		1.33735	3.67969	4.78092	2.18375	2.99543	0.767259		16.9839	22.1703	8.56556	22.2893		2.01749	3.1349	1.60883	2.02816	2.19735	0.327405
2022/10/30 08:56:06	2022/11/18 08:58:25	28.734	12.9831	7.38078	11.4834		4.05859	2.41295	1.05023	2.53105	2.5132	0.615013		14.1192	8.90819	12.2909	11.1226		2.82389	2.93164	2.75973	2.48949	2.75118	0.0941662		14.239	14.4908	28.0145	9.69853		1.33917	3.68497	4.80724	2.18375	3.00378	0.772435		16.9839	22.2014	8.56556	22.3368		2.01749	3.166	1.60883	2.07566	2.217	0.332948
2022/10/30 09:01:06	2022/11/18 09:03:25	28.734	12.9862	7.38078	11.4834		4.05859	2.41608	1.05023	2.53105	2.51399	0.614971		14.1192	8.90819	12.2909	11.1226		2.82389	2.93164	2.75973	2.48949	2.75118	0.0941662		14.3261	14.4957	28.0317	9.69853		1.4262	3.6899	4.82439	2.18375	3.03106	0.76068		16.9839	22.2014	8.56556	22.3635		2.01755	3.166	1.60883	2.10239	2.22369	0.332065
2022/10/30 09:06:06	2022/11/18 09:08:25	28.734	12.9862	7.38078	11.4834		4.05859	2.41608	1.05023	2.53105	2.51399	0.614971		14.1192	8.90819	12.2909	11.1226		2.82389	2.93164	2.75973	2.48949	2.75118	0.0941662		14.4551	14.5078	28.0321	9.69853		1.55524	3.70203	4.82475	2.18375	3.06644	0.739284		17.0304	22.2014	8.56556	22.3636		2.064	3.166	1.60883	2.10249	2.23533	0.329854
2022/10/30 09:11:06	2022/11/18 09:13:25	28.734	12.9862	7.38078	11.4834		4.05859	2.41608	1.05023	2.53105	2.51399	0.614971		14.1192	8.90819	12.2909	11.1226		2.82389	2.93164	2.75973	2.48949	2.75118	0.0941662		14.4915	14.5497	28.0321	9.69853		1.59165	3.74395	4.82475	2.18375	3.08602	0.736166		17.1168	22.2014	8.56556	22.3636		2.15041	3.166	1.60883	2.10249	2.25693	0.326807
2022/10/30 09:16:06	2022/11/18 09:18:25	28.734	12.9862	7.38078	11.4834		4.05859	2.41608	1.05023	2.53105	2.51399	0.614971		14.1192	8.90819	12.2909	11.1226		2.82389	2.93164	2.75973	2.48949	2.75118	0.0941662		14.4915	14.5756	28.0321	9.69853		1.59165	3.76976	4.82475	2.18375	3.09248	0.738114		17.2014	22.2014	8.56556	22.3636		2.235	3.166	1.60883	2.10249	2.27808	0.32519
2022/10/30 09:21:06	2022/11/18 09:23:25	28.734	12.9862	7.38078	11.4834		4.05859	2.41608	1.05023	2.53105	2.51399	0.614971		14.1192	9.01053	12.2909	11.1226		2.82389	3.03397	2.75973	2.48949	2.77677	0.112249		14.4915	14.5758	28.0321	9.69853		1.59165	3.76997	4.82475	2.18375	3.09253	0.73813		17.2287	22.2014	8.56556	22.3636		2.2623	3.166	1.60883	2.10249	2.28491	0.32496
2022/10/30 09:26:06	2022/11/18 09:28:25	28.734	12.9862	7.38078	11.4834		4.05859	2.41608	1.05023	2.53105	2.51399	0.614971		14.1192	9.01608	12.2909	11.1226		2.82389	3.03952	2.75973	2.48949	2.77816	0.113311		14.4915	14.5758	28.0321	9.69853		1.59165	3.76997	4.82475	2.18375	3.09253	0.73813		17.2287	22.2014	8.56556	22.3636		2.2623	3.166	1.60883	2.10249	2.28491	0.32496
2022/10/30 09:31:06	2022/11/18 09:33:25	28.734	12.9862	7.38078	11.4834		4.05859	2.41608	1.05023	2.53105	2.51399	0.614971		14.1192	9.01608	12.2909	11.1226		2.82389	3.03952	2.75973	2.48949	2.77816	0.113311		14.4915	14.5758	28.0321	9.69853		1.59165	3.76997	4.82475	2.18375	3.09253	0.73813		17.2287	22.2014	8.56556	22.3636		2.2623	3.166	1.60883	2.10249	2.28491	0.32496
2022/10/30 09:36:06	2022/11/18 09:38:25	28.734	12.9862	7.38078	11.4834		4.05859	2.41608	1.05023	2.53105	2.51399	0.614971		14.1192	9.01608	12.2909	11.1226		2.82389	3.03952	2.75973	2.48949	2.77816	0.113311		14.4915	14.5758	28.0321	9.69853		1.59165	3.76997	4.82475	2.18375	3.09253	0.73813		17.2287	22.2014	8.56556	22.3636		2.2623	3.166	1.60883	2.10249	2.28491	0.32496
2022/10/30 09:41:06	2022/11/18 09:43:25	28.734	12.9862	7.38176	11.4834		4.05859	2.41608	1.05121	2.53105	2.51423	0.614775		14.1192	9.01608	12.2909	11.1226		2.82389	3.03952	2.75973	2.48949	2.77816	0.113311		14.4915	14.5758	28.0321	9.69853		1.59165	3.76997	4.82475	2.18375	3.09253	0.73813		17.2287	22.2014	8.56556	22.3636		2.2623	3.166	1.60883	2.10249	2.28491	0.32496
2022/10/30 09:46:06	2022/11/18 09:48:25	28.734	12.9862	7.38264	11.4834		4.05859	2.41608	1.05209	2.53105	2.51445	0.614602		14.1192	9.01608	12.2909	11.1226		2.82389	3.03952	2.75973	2.48949	2.77816	0.113311		14.4915	14.5758	28.0321	9.69853		1.59165	3.76997	4.82475	2.18375	3.09253	0.73813		17.2287	22.2014	8.56556	22.3636		2.2623	3.166	1.60883	2.10249	2.28491	0.32496
2022/10/30 09:51:06	2022/11/18 09:53:25	28.734	12.9862	7.38264	11.4834		4.05859	2.41608	1.05209	2.53105	2.51445	0.614602		14.1192	9.01608	12.2909	11.1226		2.82389	3.03952	2.75973	2.48949	2.77816	0.113311		14.4915	14.5758	28.0321	9.69853		1.59165	3.76997	4.82475	2.18375	3.09253	0.73813		17.2287	22.2014	8.56556	22.3636		2.2623	3.166	1.60883	2.10249	2.28491	0.32496
2022/10/30 09:56:06	2022/11/18 09:58:25	28.734	12.9862	7.38264	11.4834		4.05859	2.41608	1.05209	2.53105	2.51445	0.614602		14.1192	9.01608	12.2909	11.1226		2.82389	3.03952	2.75973	2.48949	2.77816	0.113311		14.4915	14.5758	28.0321	9.69853		1.59165	3.76997	4.82475	2.18375	3.09253	0.73813		17.2287	22.2014	8.56556	22.3636		2.2623	3.166	1.60883	2.10249	2.28491	0.32496
2022/10/30 10:01:06	2022/11/18 10:03:25	28.734	12.9862	7.38264	11.4834		4.05859	2.41608	1.05209	2.53105	2.51445	0.614602		14.1192	9.01608	12.2909	11.1226		2.82389	3.03952	2.75973	2.48949	2.77816	0.113311		14.4915	14.5758	28.0321	9.69853		1.59165	3.76997	4.82475	2.18375	3.09253	0.73813		17.2287	22.2014	8.56556	22.3636		2.2623	3.166	1.60883	2.10249	2.28491	0.32496
2022/10/30 10:06:06	2022/11/18 10:08:25	28.734	12.9862	7.38264	11.4834		4.05859	2.41608	1.05209	2.53105	2.51445	0.614602		14.1192	9.01608	12.2909	11.1226		2.82389	3.03952	2.75973	2.48949	2.77816	0.113311		14.4915	14.5758	28.0321	9.69853		1.59165	3.76997	4.82475	2.18375	3.09253	0.73813		17.2287	22.2014	8.56556	22.3636		2.2623	3.166	1.60883	2.10249	2.28491	0.32496
2022/10/30 10:11:06	2022/11/18 10:13:25	28.734	12.9862	7.38264	11.4834		4.05859	2.41608	1.05209	2.53105	2.51445	0.614602		14.1192	9.01608	12.2909	11.1226		2.82389	3.03952	2.75973	2.48949	2.77816	0.113311		14.4915	14.5758	28.0321	9.69853		1.59165	3.76997	4.82475	2.18375	3.09253	0.73813		17.2287	22.2014	8.56556	22.3636		2.2623	3.166	1.60883	2.10249	2.28491	0.32496
2022/10/30 10:16:06	2022/11/18 10:18:25	28.734	12.9862	7.38264	11.4834		4.05859	2.41608	1.05209	2.53105	2.51445	0.614602		14.1192	9.01608	12.2909	11.1226		2.82389	3.03952	2.75973	2.48949	2.77816	0.113311		14.4915	14.5758	28.0352	9.69853		1.59165	3.76997	4.82785	2.18375	3.0933	0.738737		17.2287	22.2037	8.56556	22.3636		2.2623	3.16829	1.60883	2.10249	2.28548	0.325478
2022/10/30 10:21:06	2022/11/18 10:23:25	28.734	12.9862	7.38264	11.4834		4.05859	2.41608	1.05209	2.53105	2.51445	0.614602		14.1192	9.01608	12.2909	11.1226		2.82389	3.03952	2.75973	2.48949	2.77816	0.113311		14.4915	14.5758	28.0944	9.69853		1.59165	3.76997	4.8871	2.18375	3.10812	0.750386		17.2287	22.2442	8.56556	22.3636		2.2623	3.20879	1.60883	2.10249	2.2956	0.33466
2022/10/30 10:26:06	2022/11/18 10:28:25	28.734	12.9862	7.38264	11.4834		4.05859	2.41608	1.05209	2.53105	2.51445	0.614602		14.1192	9.01608	12.2909	11.1226		2.82389	3.03952	2.75973	2.48949	2.77816	0.113311		14.4915	14.5758	28.1642	9.69853		1.59165	3.76997	4.95686	2.18375	3.12556	0.764243		17.2287	22.297	8.56556	22.3636		2.2623	3.26158	1.60883	2.10249	2.3088	0.346707
2022/10/30 10:31:06	2022/11/18 10:33:25	28.734	12.9862	7.38264	11.4834		4.05859	2.41608	1.05209	2.53105	2.51445	0.614602		14.1192	9.01608	12.2909	11.1226		2.82389	3.03952	2.75973	2.48949	2.77816	0.113311		14.4915	14.5758	28.1739	9.69853		1.59165	3.76997	4.96654	2.18375	3.12798	0.766178		17.2287	22.3953	8.56556	22.3636		2.2623	3.35987	1.60883	2.10249	2.33337	0.369348
2022/10/30 10:36:06	2022/11/18 10:38:25	28.734	12.9862	7.38264	11.4834		4.05859	2.41608	1.05209	2.53105	2.51445	0.614602		14.1192	9.01608	12.2909	11.1226		2.82389	3.03952	2.75973	2.48949	2.77816	0.113311		14.4915	14.5758	28.1739	9.69853		1.59165	3.76997	4.96654	2.18375	3.12798	0.766178		17.2287	22.4937	8.56556	22.3636		2.2623	3.45829	1.60883	2.10249	2.35798	0.392251
2022/10/30 10:41:06	2022/11/18 10:43:25	28.734	12.9862	7.38264	11.4834		4.05859	2.41608	1.05209	2.53105	2.51445	0.614602		14.1192	9.01608	12.2909	11.1226		2.82389	3.03952	2.75973	2.48949	2.77816	0.113311		14.4915	14.5758	28.1739	9.69853		1.59165	3.76997	4.96654	2.18375	3.12798	0.766178		17.2287	22.5921	8.56556	22.3636		2.2623	3.55671	1.60883	2.10249	2.38258	0.41535
2022/10/30 10:46:06	2022/11/18 10:48:25	28.734	12.9862	7.38264	11.4834		4.05859	2.41608	1.05209	2.53105	2.51445	0.614602		14.1192	9.01608	12.2909	11.1226		2.82389	3.03952	2.75973	2.48949	2.77816	0.113311		14.4915	14.5758	28.1739	9.69853		1.59165	3.76997	4.96654	2.18375	3.12798	0.766178		17.2287	22.6617	8.56556	22.3636		2.2623	3.62633	1.60883	2.10249	2.39999	0.431789
2022/10/30 10:51:06	2022/11/18 10:53:25	28.734	12.9862	7.38264	11.4834		4.05859	2.41608	1.05209	2.53105	2.51445	0.614602		14.1192	9.01608	12.2909	11.1226		2.82389	3.03952	2.75973	2.48949	2.77816	0.113311		14.4915	14.5758	28.1739	9.69853		1.59165	3.76997	4.96654	2.18375	3.12798	0.766178		17.2287	22.6644	8.56556	22.3636		2.2623	3.62905	1.60883	2.10249	2.40067	0.432433
2022/10/30 10:56:06	2022/11/18 10:58:25	28.734	12.9862	7.38264	11.4834		4.05859	2.41608	1.05209	2.53105	2.51445	0.614602		14.1192	9.01608	12.2909	11.1226		2.82389	3.03952	2.75973	2.48949	2.77816	0.113311		14.4915	14.5758	28.1739	9.69853		1.59165	3.76997	4.96654	2.18375	3.12798	0.766178		17.2287	22.6644	8.56556	22.3636		2.2623	3.62905	1.60883	2.10249	2.40067	0.432433
2022/10/30 11:01:06	2022/11/18 11:03:25	28.734	12.9862	7.38264	11.4834		4.05859	2.41608	1.05209	2.53105	2.51445	0.614602		14.1192	9.01608	12.2909	11.1226		2.82389	3.03952	2.75973	2.48949	2.77816	0.113311		14.4915	14.5758	28.1739	9.69853		1.59165	3.76997	4.96654	2.18375	3.12798	0.766178		17.2287	22.6644	8.56556	22.3636		2.2623	3.62905	1.60883	2.10249	2.40067	0.432433
2022/10/30 11:06:06	2022/11/18 11:08:25	28.734	12.9862	7.38264	11.4834		4.05859	2.41608	1.05209	2.53105	2.51445	0.614602		14.1192	9.01608	12.2909	11.1226		2.82389	3.03952	2.75973	2.48949	2.77816	0.113311		14.4915	14.5758	28.1739	9.69853		1.59165	3.76997	4.96654	2.18375	3.12798	0.766178		17.2287	22.6644	8.56556	22.3636		2.2623	3.62905	1.60883	2.10249	2.40067	0.432433
2022/10/30 11:11:06	2022/11/18 11:13:25	28.734	12.9862	7.38264	11.4834		4.05859	2.41608	1.05209	2.53105	2.51445	0.614602		14.1192	9.01608	12.2909	11.1226		2.82389	3.03952	2.75973	2.48949	2.77816	0.113311		14.4915	14.5758	28.1739	9.69853		1.59165	3.76997	4.96654	2.18375	3.12798	0.766178		17.2287	22.6644	8.56556	22.3636		2.2623	3.62905	1.60883	2.10249	2.40067	0.432433
2022/10/30 11:16:06	2022/11/18 11:18:25	28.734	12.9862	7.38264	11.4834		4.05859	2.41608	1.05209	2.53105	2.51445	0.614602		14.1192	9.01608	12.2909	11.1226		2.82389	3.03952	2.75973	2.48949	2.77816	0.113311		14.4915	14.5758	28.1739	9.69853		1.59165	3.76997	4.96654	2.18375	3.12798	0.766178		17.2287	22.6644	8.56556	22.3636		2.2623	3.62905	1.60883	2.10249	2.40067	0.432433
2022/10/30 11:21:06	2022/11/18 11:23:25	28.734	12.9862	7.38264	11.4834		4.05859	2.41608	1.05209	2.53105	2.51445	0.614602		14.1192	9.01608	12.2909	11.1226		2.82389	3.03952	2.75973	2.48949	2.77816	0.113311		14.4915	14.5758	28.1739	9.69853		1.59165	3.76997	4.96654	2.18375	3.12798	0.766178		17.2287	22.6644	8.56556	22.3636		2.2623	3.62905	1.60883	2.10249	2.40067	0.432433
2022/10/30 11:26:06	2022/11/18 11:28:25	28.734	12.9862	7.38264	11.4834		4.05859	2.41608	1.05209	2.53105	2.51445	0.614602		14.1192	9.01608	12.2909	11.1226		2.82389	3.03952	2.75973	2.48949	2.77816	0.113311		14.4915	14.5758	28.1739	9.69853		1.59165	3.76997	4.96654	2.18375	3.12798	0.766178		17.2784	22.6644	8.56556	22.3636		2.312	3.62905	1.60883	2.10249	2.41309	0.431285
2022/10/30 11:31:06	2022/11/18 11:33:25	28.734	12.9863	7.38264	11.4834		4.05859	2.41612	1.05209	2.53105	2.51446	0.614601		14.1192	9.01608	12.2909	11.1226		2.82389	3.03952	2.75973	2.48949	2.77816	0.113311		14.4915	14.5758	28.1739	9.69853		1.59165	3.76997	4.96654	2.18375	3.12798	0.766178		17.3975	22.6644	8.56556	22.3636		2.43112	3.62905	1.60883	2.10249	2.44287	0.429984
2022/10/30 11:36:06	2022/11/18 11:38:25	28.734	13.0018	7.38264	11.4834		4.05859	2.43171	1.05209	2.53105	2.51836	0.614405		14.1192	9.01608	12.2909	11.1226		2.82389	3.03952	2.75973	2.48949	2.77816	0.113311		14.497	14.5758	28.1739	9.69853		1.59718	3.76997	4.96654	2.18375	3.12936	0.765254		17.512	22.6644	8.56556	22.3636		2.54563	3.62905	1.60883	2.10249	2.4715	0.430676
2022/10/30 11:41:06	2022/11/18 11:43:25	28.734	13.0218	7.38264	11.4834		4.05859	2.45167	1.05209	2.53105	2.52335	0.614191		14.1192	9.01608	12.2909	11.1226		2.82389	3.03952	2.75973	2.48949	2.77816	0.113311		14.4976	14.5758	28.1739	9.69853		1.59773	3.76997	4.96654	2.18375	3.1295	0.765162		17.542	22.6644	8.56556	22.3636		2.57563	3.62905	1.60883	2.10249	2.479	0.431171
2022/10/30 11:46:06	2022/11/18 11:48:25	28.8213	13.0226	7.38264	11.4834		4.14589	2.45243	1.05209	2.53105	2.54537	0.632482		14.1192	9.01608	12.2909	11.1226		2.82389	3.03952	2.75973	2.48949	2.77816	0.113311		14.4976	14.5758	28.1739	9.69853		1.59773	3.76997	4.96654	2.18375	3.1295	0.765162		17.542	22.6644	8.56556	22.3636		2.57563	3.62905	1.60883	2.10249	2.479	0.431171
2022/10/30 11:51:06	2022/11/18 11:53:25	28.8494	13.0226	7.38264	11.4834		4.17397	2.45243	1.05209	2.53105	2.55239	0.638414		14.1192	9.01608	12.2909	11.1226		2.82389	3.03952	2.75973	2.48949	2.77816	0.113311		14.4976	14.5758	28.1739	9.69853		1.59773	3.76997	4.96654	2.18375	3.1295	0.765162		17.542	22.6644	8.56556	22.3636		2.57563	3.62905	1.60883	2.10249	2.479	0.431171
2022/10/30 11:56:06	2022/11/18 11:58:25	28.8494	13.0226	7.38264	11.4834		4.17397	2.45243	1.05209	2.53105	2.55239	0.638414		14.1192	9.01608	12.2909	11.1226		2.82389	3.03952	2.75973	2.48949	2.77816	0.113311		14.4976	14.5758	28.1739	9.69853		1.59773	3.76997	4.96654	2.18375	3.1295	0.765162		17.542	22.6644	8.56556	22.4058		2.57563	3.62905	1.60883	2.1447	2.48955	0.428219
2022/10/30 12:01:06	2022/11/18 12:03:25	28.8494	13.0226	7.38264	11.4834		4.17397	2.45243	1.05209	2.53105	2.55239	0.638414		14.1192	9.01608	12.2909	11.1226		2.82389	3.03952	2.75973	2.48949	2.77816	0.113311		14.4976	14.5758	28.1739	9.69853		1.59773	3.76997	4.96654	2.18375	3.1295	0.765162		17.542	22.6644	8.56556	22.4476		2.57563	3.62905	1.60883	2.1865	2.5	0.425532
2022/10/30 12:06:06	2022/11/18 12:08:25	28.8494	13.0226	7.38264	11.4834		4.17397	2.45243	1.05209	2.53105	2.55239	0.638414		14.1192	9.01608	12.2909	11.1226		2.82389	3.03952	2.75973	2.48949	2.77816	0.113311		14.4976	14.5758	28.1739	9.69853		1.59773	3.76997	4.96654	2.18375	3.1295	0.765162		17.542	22.6644	8.56556	22.4748		2.57563	3.62905	1.60883	2.21367	2.5068	0.423916
2022/10/30 12:11:06	2022/11/18 12:13:25	28.8494	13.0226	7.38264	11.4834		4.17397	2.45243	1.05209	2.53105	2.55239	0.638414		14.1192	9.12077	12.2909	11.1226		2.82389	3.14421	2.75973	2.48949	2.80433	0.134479		14.4976	14.5758	28.1739	9.69853		1.59773	3.76997	4.96654	2.18375	3.1295	0.765162		17.542	22.6644	8.56556	22.4748		2.57563	3.62905	1.60883	2.21367	2.5068	0.423916
2022/10/30 12:16:06	2022/11/18 12:18:25	28.8494	13.0226	7.38264	11.4834		4.17397	2.45243	1.05209	2.53105	2.55239	0.638414		14.1192	9.12396	12.2909	11.1226		2.82389	3.1474	2.75973	2.48949	2.80513	0.135152		14.4976	14.5758	28.1739	9.69853		1.59773	3.76997	4.96654	2.18375	3.1295	0.765162		17.542	22.6644	8.56556	22.4748		2.57563	3.62905	1.60883	2.21367	2.5068	0.423916
2022/10/30 12:21:06	2022/11/18 12:23:25	28.8494	13.0226	7.38264	11.4834		4.17397	2.45243	1.05209	2.53105	2.55239	0.638414		14.1192	9.12396	12.2909	11.1226		2.82389	3.1474	2.75973	2.48949	2.80513	0.135152		14.4976	14.5758	28.1739	9.69853		1.59773	3.76997	4.96654	2.18375	3.1295	0.765162		17.542	22.6644	8.56556	22.4748		2.57563	3.62905	1.60883	2.21367	2.5068	0.423916
2022/10/30 12:26:06	2022/11/18 12:28:25	28.8494	13.0226	7.38264	11.4834		4.17397	2.45243	1.05209	2.53105	2.55239	0.638414		14.1192	9.12396	12.2909	11.1226		2.82389	3.1474	2.75973	2.48949	2.80513	0.135152		14.4976	14.5758	28.1739	9.69853		1.59773	3.76997	4.96654	2.18375	3.1295	0.765162		17.542	22.6644	8.56556	22.4748		2.57563	3.62905	1.60883	2.21367	2.5068	0.423916
2022/10/30 12:31:06	2022/11/18 12:33:25	28.8494	13.0226	7.38264	11.4834		4.17397	2.45243	1.05209	2.53105	2.55239	0.638414		14.1192	9.12396	12.2909	11.1226		2.82389	3.1474	2.75973	2.48949	2.80513	0.135152		14.4976	14.5758	28.1739	9.69853		1.59773	3.76997	4.96654	2.18375	3.1295	0.765162		17.542	22.6644	8.56556	22.4748		2.57563	3.62905	1.60883	2.21367	2.5068	0.423916
2022/10/30 12:36:06	2022/11/18 12:38:25	28.8494	13.0226	7.38264	11.4834		4.17397	2.45243	1.05209	2.53105	2.55239	0.638414		14.1192	9.12396	12.3638	11.1226		2.82389	3.1474	2.83264	2.48949	2.82335	0.134338		14.4976	14.5758	28.1739	9.69853		1.59773	3.76997	4.96654	2.18375	3.1295	0.765162		17.542	22.6644	8.56556	22.4748		2.57563	3.62905	1.60883	2.21367	2.5068	0.423916
2022/10/30 12:41:06	2022/11/18 12:43:25	28.8494	13.0226	7.38264	11.4834		4.17397	2.45243	1.05209	2.53105	2.55239	0.638414		14.1192	9.12396	12.4852	11.1226		2.82389	3.1474	2.95398	2.48949	2.85369	0.1384		14.4976	14.5758	28.1739	9.69853		1.59773	3.76997	4.96654	2.18375	3.1295	0.765162		17.542	22.6644	8.5665	22.4748		2.57563	3.62905	1.60977	2.21367	2.50703	0.42375
2022/10/30 12:46:06	2022/11/18 12:48:25	28.8494	13.0226	7.38264	11.4834		4.17397	2.45243	1.05209	2.53105	2.55239	0.638414		14.1192	9.12396	12.49	11.1226		2.82389	3.1474	2.95886	2.48949	2.85491	0.1387		14.4976	14.5758	28.1739	9.69853		1.59773	3.76997	4.96654	2.18375	3.1295	0.765162		17.542	22.6644	8.58764	22.4748		2.57563	3.62905	1.63091	2.21367	2.51232	0.420037
2022/10/30 12:51:06	2022/11/18 12:53:25	28.8494	13.0226	7.38264	11.4834		4.17397	2.45243	1.05209	2.53105	2.55239	0.638414		14.1192	9.12396	12.49	11.1226		2.82389	3.1474	2.95886	2.48949	2.85491	0.1387		14.4976	14.5758	28.1739	9.69853		1.59773	3.76997	4.96654	2.18375	3.1295	0.765162		17.542	22.6644	8.58769	22.4748		2.57563	3.62905	1.63096	2.21367	2.51233	0.420027
2022/10/30 12:56:06	2022/11/18 12:58:25	28.8494	13.0226	7.38264	11.4834		4.17397	2.45243	1.05209	2.53105	2.55239	0.638414		14.1192	9.12396	12.49	11.1226		2.82389	3.1474	2.95886	2.48949	2.85491	0.1387		14.4976	14.5758	28.1739	9.69853		1.59773	3.76997	4.96654	2.18375	3.1295	0.765162		17.542	22.6644	8.58769	22.4748		2.57563	3.62905	1.63096	2.21367	2.51233	0.420027
2022/10/30 13:01:06	2022/11/18 13:03:25	28.8494	13.0226	7.38264	11.4834		4.17397	2.45243	1.05209	2.53105	2.55239	0.638414		14.1192	9.12396	12.49	11.1226		2.82389	3.1474	2.95886	2.48949	2.85491	0.1387		14.4976	14.5758	28.1739	9.69853		1.59773	3.76997	4.96654	2.18375	3.1295	0.765162		17.542	22.6644	8.58769	22.4748		2.57563	3.62905	1.63096	2.21367	2.51233	0.420027
2022/10/30 13:06:06	2022/11/18 13:08:25	28.8494	13.0226	7.38264	11.4834		4.17397	2.45243	1.05209	2.53105	2.55239	0.638414		14.1192	9.12396	12.49	11.1226		2.82389	3.1474	2.95886	2.48949	2.85491	0.1387		14.4976	14.5758	28.1739	9.69853		1.59773	3.76997	4.96654	2.18375	3.1295	0.765162		17.542	22.6644	8.58769	22.5038		2.57563	3.62905	1.63096	2.24274	2.5196	0.418364
2022/10/30 13:11:06	2022/11/18 13:13:25	28.8494	13.0226	7.38264	11.4834		4.17397	2.45243	1.05209	2.53105	2.55239	0.638414		14.1486	9.12396	12.49	11.1226		2.8533	3.1474	2.95886	2.48949	2.86226	0.138346		14.4976	14.5758	28.1739	9.69853		1.59773	3.76997	4.96654	2.18375	3.1295	0.765162		17.542	22.6644	8.58769	22.539		2.57563	3.62905	1.63096	2.27787	2.52838	0.416515
2022/10/30 13:16:06	2022/11/18 13:18:25	28.8494	13.0226	7.38264	11.4834		4.17397	2.45243	1.05209	2.53105	2.55239	0.638414		14.2201	9.12396	12.49	11.1226		2.92479	3.1474	2.95886	2.48949	2.88013	0.139113		14.552	14.5988	28.1739	9.69853		1.65217	3.79303	4.96654	2.18375	3.14887	0.757762		17.542	22.6644	8.58769	22.5627		2.57563	3.62905	1.63096	2.30164	2.53432	0.415365
2022/10/30 13:21:06	2022/11/18 13:23:25	28.8494	13.0226	7.38264	11.4834		4.17397	2.45243	1.05209	2.53105	2.55239	0.638414		14.286	9.12396	12.49	11.1226		2.99071	3.1474	2.95886	2.48949	2.89661	0.141826		14.5815	14.6698	28.1739	9.69853		1.68164	3.86395	4.96654	2.18375	3.17397	0.758121		17.542	22.669	8.58769	22.5627		2.57563	3.63363	1.63096	2.30164	2.53547	0.416371
2022/10/30 13:26:06	2022/11/18 13:28:25	28.8494	13.3745	7.38264	11.4834		4.17397	2.80437	1.05209	2.53105	2.64037	0.639884		14.2987	9.12396	12.49	11.1226		3.00342	3.1474	2.95886	2.48949	2.89979	0.142562		14.5821	14.7138	28.1739	9.69853		1.68224	3.90798	4.96654	2.18375	3.18513	0.761434		17.542	22.689	8.58769	22.5627		2.57563	3.65359	1.63096	2.30164	2.54046	0.420765
2022/10/30 13:31:06	2022/11/18 13:33:25	28.8494	13.6124	7.38264	11.4834		4.17397	3.04227	1.05209	2.53105	2.69984	0.647681		14.2987	9.12396	12.49	11.1226		3.00342	3.1474	2.95886	2.48949	2.89979	0.142562		14.5821	14.7143	28.1739	9.69853		1.68224	3.90846	4.96654	2.18375	3.18525	0.761472		17.542	22.7036	8.58769	22.5627		2.57563	3.66825	1.63096	2.30164	2.54412	0.424
2022/10/30 13:36:06	2022/11/18 13:38:25	28.8494	13.6124	7.38264	11.4834		4.17397	3.04227	1.05209	2.53105	2.69984	0.647681		14.2987	9.12396	12.49	11.1226		3.00342	3.1474	2.95886	2.48949	2.89979	0.142562		14.5821	14.7143	28.1739	9.69853		1.68224	3.90846	4.96654	2.18375	3.18525	0.761472		17.542	22.7036	8.58769	22.5627		2.57563	3.66825	1.63096	2.30164	2.54412	0.424
2022/10/30 13:41:06	2022/11/18 13:43:25	28.8494	13.6124	7.38264	11.4834		4.17397	3.04227	1.05209	2.53105	2.69984	0.647681		14.2987	9.12396	12.49	11.1226		3.00342	3.1474	2.95886	2.48949	2.89979	0.142562		14.5821	14.7143	28.1739	9.69853		1.68224	3.90846	4.96654	2.18375	3.18525	0.761472		17.542	22.7036	8.58769	22.5627		2.57563	3.66825	1.63096	2.30164	2.54412	0.424
2022/10/30 13:46:06	2022/11/18 13:48:25	28.8494	13.6124	7.38264	11.4834		4.17397	3.04227	1.05209	2.53105	2.69984	0.647681		14.2987	9.12396	12.49	11.1226		3.00342	3.1474	2.95886	2.48949	2.89979	0.142562		14.5821	14.7143	28.1739	9.69853		1.68224	3.90846	4.96654	2.18375	3.18525	0.761472		17.542	22.7036	8.58769	22.5627		2.57563	3.66825	1.63096	2.30164	2.54412	0.424
2022/10/30 13:51:06	2022/11/18 13:53:25	28.9003	13.6124	7.38264	11.4834		4.22494	3.04227	1.05209	2.53105	2.71259	0.657401		14.2987	9.12396	12.49	11.1226		3.00342	3.1474	2.95886	2.48949	2.89979	0.142562		14.5821	14.7143	28.1739	9.69853		1.68224	3.90846	4.96654	2.18375	3.18525	0.761472		17.542	22.7036	8.58769	22.5627		2.57563	3.66825	1.63096	2.30164	2.54412	0.424
2022/10/30 13:56:06	2022/11/18 13:58:25	28.957	13.6124	7.38264	11.4834		4.28166	3.04227	1.05209	2.53105	2.72677	0.668337		14.3384	9.12396	12.49	11.1226		3.04314	3.1474	2.95886	2.48949	2.90972	0.145288		14.5821	14.7143	28.1739	9.69853		1.68224	3.90846	4.96654	2.18375	3.18525	0.761472		17.542	22.7036	8.58769	22.5627		2.57563	3.66825	1.63096	2.30164	2.54412	0.424
2022/10/30 14:01:06	2022/11/18 14:03:25	28.957	13.6124	7.38264	11.4834		4.28166	3.04227	1.05209	2.53105	2.72677	0.668337		14.3968	9.12396	12.49	11.1226		3.10151	3.1474	2.95886	2.48949	2.92431	0.150398		14.5821	14.7143	28.1739	9.69853		1.68224	3.90846	4.96654	2.18375	3.18525	0.761472		17.542	22.7036	8.58769	22.5627		2.57563	3.66825	1.63096	2.30164	2.54412	0.424
2022/10/30 14:06:06	2022/11/18 14:08:25	28.957	13.6124	7.38264	11.4834		4.28166	3.04227	1.05209	2.53105	2.72677	0.668337		14.3968	9.12396	12.49	11.1226		3.10151	3.1474	2.95886	2.48949	2.92431	0.150398		14.5821	14.7143	28.1739	9.69853		1.68224	3.90846	4.96654	2.18375	3.18525	0.761472		17.542	22.7036	8.58769	22.5627		2.57563	3.66825	1.63096	2.30164	2.54412	0.424
2022/10/30 14:11:06	2022/11/18 14:13:25	28.957	13.6124	7.38773	11.4834		4.28166	3.04227	1.05718	2.53105	2.72804	0.667275		14.3968	9.12396	12.4921	11.2306		3.10151	3.1474	2.96092	2.59754	2.95184	0.124585		14.5821	14.7143	28.2321	9.69853		1.68224	3.90846	5.02475	2.18375	3.1998	0.772873		17.542	22.7036	8.58769	22.5873		2.57563	3.66825	1.63096	2.32622	2.55027	0.422872
2022/10/30 14:16:06	2022/11/18 14:18:25	28.957	13.6124	7.39265	11.4834		4.28166	3.04227	1.0621	2.53105	2.72927	0.666248		14.3968	9.12396	12.5	11.2563		3.10151	3.1474	2.96881	2.62315	2.96022	0.118565		14.5821	14.7143	28.3374	9.71491		1.68224	3.90846	5.13013	2.20013	3.23024	0.791991		17.542	22.7036	8.60942	22.6019		2.57563	3.66825	1.6527	2.34076	2.55933	0.418303
2022/10/30 14:21:06	2022/11/18 14:23:25	28.9812	13.6124	7.39265	11.489		4.30585	3.04227	1.0621	2.53658	2.7367	0.670817		14.3968	9.12396	12.5033	11.369		3.10151	3.1474	2.97213	2.73586	2.98922	0.0922474		14.5821	14.7143	28.4979	9.73669		1.68224	3.90846	5.29058	2.2219	3.2758	0.822077		17.542	22.7036	8.68487	22.6019		2.57563	3.66825	1.72815	2.34076	2.5782	0.404885
2022/10/30 14:26:06	2022/11/18 14:28:25	29.0623	13.6124	7.39265	11.498		4.3869	3.04227	1.0621	2.54562	2.75922	0.686495		14.3968	9.12396	12.5033	11.369		3.10151	3.1474	2.97213	2.73586	2.98922	0.0922474		14.5821	14.7143	28.5538	9.73671		1.68224	3.90846	5.34651	2.22193	3.28978	0.833537		17.542	22.7036	8.69206	22.6019		2.57563	3.66825	1.73533	2.34076	2.57999	0.40363
2022/10/30 14:31:06	2022/11/18 14:33:25	29.0712	13.6124	7.39265	11.4995		4.39586	3.04227	1.0621	2.54707	2.76182	0.688229		14.3968	9.12396	12.5033	11.369		3.10151	3.1474	2.97213	2.73586	2.98922	0.0922474		14.5821	14.7143	28.5574	9.73671		1.68224	3.90846	5.35014	2.22193	3.29069	0.834283		17.5422	22.7415	8.69206	22.6019		2.57578	3.70614	1.73533	2.34076	2.5895	0.412164
2022/10/30 14:36:06	2022/11/18 14:38:25	29.0712	13.6124	7.39265	11.4995		4.39586	3.04227	1.0621	2.54715	2.76184	0.688227		14.3968	9.12396	12.5033	11.369		3.10151	3.1474	2.97213	2.73586	2.98922	0.0922474		14.5821	14.7143	28.5574	9.73671		1.68224	3.90846	5.35014	2.22193	3.29069	0.834283		17.6755	22.7666	8.69206	22.6019		2.7091	3.73122	1.73533	2.34076	2.6291	0.418631
2022/10/30 14:41:06	2022/11/18 14:43:25	29.0712	13.6124	7.39265	11.4995		4.39586	3.04227	1.0621	2.54715	2.76184	0.688227		14.3968	9.12396	12.5045	11.369		3.10151	3.1474	2.9733	2.73586	2.98952	0.0922298		14.5821	14.7143	28.5574	9.73671		1.68224	3.90846	5.35014	2.22193	3.29069	0.834283		17.8309	22.7666	8.69206	22.6019		2.86453	3.73122	1.73533	2.34076	2.66796	0.422888
2022/10/30 14:46:06	2022/11/18 14:48:25	29.0712	13.6124	7.39265	11.4995		4.39586	3.04227	1.0621	2.54715	2.76184	0.688227		14.3968	9.12396	12.508	11.369		3.10151	3.1474	2.97687	2.73586	2.99041	0.0921818		14.5821	14.7143	28.5574	9.73671		1.68224	3.90846	5.35014	2.22193	3.29069	0.834283		17.8331	22.7666	8.69206	22.6019		2.86669	3.73122	1.73533	2.34076	2.6685	0.422972
2022/10/30 14:51:06	2022/11/18 14:53:25	29.0712	13.6124	7.39265	11.4995		4.39586	3.04227	1.0621	2.54715	2.76184	0.688227		14.3968	9.12396	12.508	11.369		3.10151	3.1474	2.97687	2.73586	2.99041	0.0921818		14.5821	14.7143	28.5574	9.73671		1.68224	3.90846	5.35014	2.22193	3.29069	0.834283		17.8331	22.7666	8.69206	22.6019		2.86669	3.73122	1.73533	2.34076	2.6685	0.422972
2022/10/30 14:56:06	2022/11/18 14:58:25	29.0712	13.6124	7.39265	11.4995		4.39586	3.04227	1.0621	2.54715	2.76184	0.688227		14.3968	9.12396	12.508	11.369		3.10151	3.1474	2.97687	2.73586	2.99041	0.0921818		14.5821	14.7143	28.5574	9.73671		1.68224	3.90846	5.35014	2.22193	3.29069	0.834283		17.8331	22.7666	8.69206	22.6019		2.86669	3.73122	1.73533	2.34076	2.6685	0.422972
2022/10/30 15:01:06	2022/11/18 15:03:25	29.0712	13.6124	7.39265	11.4995		4.39586	3.04227	1.0621	2.54715	2.76184	0.688227		14.3968	9.12396	12.508	11.369		3.10151	3.1474	2.97687	2.73586	2.99041	0.0921818		14.5821	14.7143	28.5574	9.73671		1.68224	3.90846	5.35014	2.22193	3.29069	0.834283		17.8331	22.7666	8.69206	22.6019		2.86669	3.73122	1.73533	2.34076	2.6685	0.422972
2022/10/30 15:06:06	2022/11/18 15:08:25	29.0712	13.6124	7.39265	11.4995		4.39586	3.04227	1.0621	2.54715	2.76184	0.688227		14.3968	9.12396	12.508	11.369		3.10151	3.1474	2.97687	2.73586	2.99041	0.0921818		14.5821	14.7143	28.5574	9.73671		1.68224	3.90846	5.35014	2.22193	3.29069	0.834283		17.8331	22.7666	8.69206	22.6019		2.86669	3.73122	1.73533	2.34076	2.6685	0.422972
2022/10/30 15:11:06	2022/11/18 15:13:25	29.0712	13.6124	7.39265	11.4995		4.39586	3.04227	1.0621	2.54715	2.76184	0.688227		14.3968	9.12396	12.508	11.369		3.10151	3.1474	2.97687	2.73586	2.99041	0.0921818		14.5821	14.7143	28.5574	9.73671		1.68224	3.90846	5.35014	2.22193	3.29069	0.834283		17.8331	22.7666	8.69206	22.6019		2.86669	3.73122	1.73533	2.34076	2.6685	0.422972
2022/10/30 15:16:06	2022/11/18 15:18:25	29.0712	13.6124	7.40867	11.4995		4.39586	3.04227	1.07812	2.54715	2.76585	0.684934		14.3968	9.12396	12.508	11.369		3.10151	3.1474	2.97687	2.73586	2.99041	0.0921818		14.5821	14.7143	28.5574	9.73671		1.68224	3.90846	5.35014	2.22193	3.29069	0.834283		17.8331	22.7666	8.69206	22.6019		2.86669	3.73122	1.73533	2.34076	2.6685	0.422972
2022/10/30 15:21:06	2022/11/18 15:23:25	29.0712	13.6124	7.41218	11.4995		4.39586	3.04227	1.08163	2.54715	2.76673	0.684212		14.3968	9.12396	12.508	11.369		3.10151	3.1474	2.97687	2.73586	2.99041	0.0921818		14.5821	14.7143	28.5574	9.73671		1.68224	3.90846	5.35014	2.22193	3.29069	0.834283		17.8331	22.7666	8.69206	22.6019		2.86669	3.73122	1.73533	2.34076	2.6685	0.422972
2022/10/30 15:26:06	2022/11/18 15:28:25	29.0712	13.6124	7.41218	11.4995		4.39586	3.04227	1.08163	2.54715	2.76673	0.684212		14.3968	9.12396	12.508	11.369		3.10151	3.1474	2.97687	2.73586	2.99041	0.0921818		14.5821	14.7143	28.663	9.73671		1.68224	3.90846	5.45572	2.22193	3.31709	0.856133		17.8331	22.7666	8.69206	22.6019		2.86669	3.73122	1.73533	2.34076	2.6685	0.422972
2022/10/30 15:31:06	2022/11/18 15:33:25	29.0712	13.6124	7.41218	11.4995		4.39586	3.04227	1.08163	2.54715	2.76673	0.684212		14.3968	9.12396	12.508	11.369		3.10151	3.1474	2.97687	2.73586	2.99041	0.0921818		14.5821	14.7143	29.0372	9.73671		1.68224	3.90846	5.82985	2.22193	3.41062	0.93545		17.8331	22.7941	8.69206	22.6019		2.86669	3.75876	1.73533	2.34076	2.67539	0.428755
2022/10/30 15:36:06	2022/11/18 15:38:25	29.0712	13.6124	7.41218	11.4995		4.39586	3.04227	1.08163	2.54715	2.76673	0.684212		14.3968	9.12396	12.508	11.369		3.10151	3.1474	2.97687	2.73586	2.99041	0.0921818		14.5821	14.7143	29.4102	9.73671		1.68224	3.90846	6.20293	2.22193	3.50389	1.01695		17.8331	22.8107	8.69206	22.602		2.86669	3.77529	1.73533	2.34087	2.67955	0.432234
2022/10/30 15:41:06	2022/11/18 15:43:25	29.0712	13.6124	7.41468	11.4995		4.39586	3.04227	1.08413	2.54715	2.76735	0.683701		14.3968	9.12396	12.508	11.369		3.10151	3.1474	2.97687	2.73586	2.99041	0.0921818		14.5821	14.7143	29.513	9.73671		1.68224	3.90846	6.30568	2.22193	3.52958	1.03975		17.8331	22.8107	8.69206	22.6694		2.86669	3.77529	1.73533	2.40832	2.69641	0.42814
2022/10/30 15:46:06	2022/11/18 15:48:25	29.0712	13.6124	7.44581	11.4995		4.39586	3.04227	1.11526	2.54715	2.77514	0.677327		14.3968	9.12396	12.508	11.369		3.10151	3.1474	2.97687	2.73586	2.99041	0.0921818		14.5821	14.7143	29.513	9.73671		1.68224	3.90846	6.30568	2.22193	3.52958	1.03975		17.8331	22.8107	8.69206	22.7442		2.86669	3.77529	1.73533	2.48306	2.71509	0.42434
2022/10/30 15:51:06	2022/11/18 15:53:25	29.0712	13.6124	7.44626	11.4995		4.39586	3.04227	1.11571	2.54715	2.77525	0.677236		14.3968	9.12396	12.508	11.369		3.10151	3.1474	2.97687	2.73586	2.99041	0.0921818		14.5821	14.7143	29.513	9.73671		1.68224	3.90846	6.30568	2.22193	3.52958	1.03975		17.8331	22.8107	8.69206	22.8544		2.86669	3.77529	1.73533	2.59334	2.74266	0.42019
2022/10/30 15:56:06	2022/11/18 15:58:25	29.0712	13.6124	7.44626	11.4995		4.39586	3.04227	1.11571	2.54715	2.77525	0.677236		14.3968	9.12396	12.508	11.369		3.10151	3.1474	2.97687	2.73586	2.99041	0.0921818		14.5821	14.7143	29.513	9.73671		1.68224	3.90846	6.30568	2.22193	3.52958	1.03975		17.8331	22.8107	8.69206	22.8712		2.86669	3.77529	1.73533	2.61009	2.74685	0.419714
2022/10/30 16:01:06	2022/11/18 16:03:25	29.0712	13.6124	7.44626	11.4995		4.39586	3.04227	1.11571	2.54715	2.77525	0.677236		14.3968	9.12396	12.508	11.369		3.10151	3.1474	2.97687	2.73586	2.99041	0.0921818		14.5821	14.7143	29.513	9.73671		1.68224	3.90846	6.30568	2.22193	3.52958	1.03975		17.8331	22.8109	8.69206	22.8712		2.86669	3.77548	1.73533	2.61009	2.7469	0.419753
2022/10/30 16:06:06	2022/11/18 16:08:25	29.0712	13.6124	7.44626	11.4995		4.39586	3.04227	1.11571	2.54715	2.77525	0.677236		14.3968	9.12396	12.508	11.369		3.10151	3.1474	2.97687	2.73586	2.99041	0.0921818		14.5821	14.7143	29.513	9.73671		1.68224	3.90846	6.30568	2.22193	3.52958	1.03975		17.8331	22.8198	8.69206	22.8712		2.86669	3.78446	1.73533	2.61009	2.74914	0.421589
2022/10/30 16:11:06	2022/11/18 16:13:25	29.0712	13.6124	7.44626	11.4995		4.39586	3.04227	1.11571	2.54715	2.77525	0.677236		14.3968	9.12396	12.508	11.369		3.10151	3.1474	2.97687	2.73586	2.99041	0.0921818		14.5821	14.7143	29.513	9.73671		1.68224	3.90846	6.30568	2.22193	3.52958	1.03975		17.8331	22.8334	8.69206	22.8712		2.86669	3.79804	1.73533	2.61009	2.75254	0.424372
2022/10/30 16:16:06	2022/11/18 16:18:25	29.0712	13.6124	7.44626	11.4995		4.39586	3.04227	1.11571	2.54715	2.77525	0.677236		14.3968	9.12396	12.508	11.369		3.10151	3.1474	2.97687	2.73586	2.99041	0.0921818		14.5821	14.7143	29.513	9.73671		1.68224	3.90846	6.30568	2.22193	3.52958	1.03975		17.8331	22.8384	8.69206	22.8712		2.86669	3.80298	1.73533	2.61009	2.75377	0.425387
2022/10/30 16:21:06	2022/11/18 16:23:25	29.0712	13.6124	7.44626	11.4995		4.39586	3.04227	1.11571	2.54715	2.77525	0.677236		14.3968	9.12396	12.508	11.369		3.10151	3.1474	2.97687	2.73586	2.99041	0.0921818		14.5821	14.7143	29.513	9.73671		1.68224	3.90846	6.30568	2.22193	3.52958	1.03975		17.8331	22.8384	8.69206	22.8712		2.86669	3.80298	1.73533	2.61009	2.75377	0.425387
2022/10/30 16:26:06	2022/11/18 16:28:25	29.0712	13.6124	7.44626	11.4995		4.39586	3.04227	1.11571	2.54715	2.77525	0.677236		14.3968	9.12396	12.508	11.369		3.10151	3.1474	2.97687	2.73586	2.99041	0.0921818		14.5821	14.7143	29.513	9.73671		1.68224	3.90846	6.30568	2.22193	3.52958	1.03975		17.8331	22.8384	8.69206	22.8712		2.86669	3.80298	1.73533	2.61009	2.75377	0.425387
2022/10/30 16:31:06	2022/11/18 16:33:25	29.0712	13.6124	7.44626	11.4995		4.39586	3.04227	1.11571	2.54715	2.77525	0.677236		14.3968	9.12396	12.508	11.369		3.10151	3.1474	2.97687	2.73586	2.99041	0.0921818		14.5821	14.7143	29.513	9.73671		1.68224	3.90846	6.30568	2.22193	3.52958	1.03975		17.8331	22.8384	8.69206	22.8712		2.86669	3.80298	1.73533	2.61009	2.75377	0.425387
2022/10/30 16:36:06	2022/11/18 16:38:25	29.0712	13.6124	7.44626	11.4995		4.39586	3.04227	1.11571	2.54715	2.77525	0.677236		14.3968	9.12396	12.508	11.369		3.10151	3.1474	2.97687	2.73586	2.99041	0.0921818		14.5894	14.7143	29.513	9.73671		1.68956	3.90846	6.30568	2.22193	3.53141	1.03866		17.8331	22.8384	8.69206	22.8712		2.86669	3.80298	1.73533	2.61009	2.75377	0.425387
2022/10/30 16:41:06	2022/11/18 16:43:25	29.0712	13.6124	7.44626	11.4995		4.39586	3.04227	1.11571	2.54715	2.77525	0.677236		14.3968	9.12396	12.508	11.369		3.10151	3.1474	2.97687	2.73586	2.99041	0.0921818		14.5906	14.7143	29.513	9.73671		1.69072	3.90846	6.30568	2.22193	3.5317	1.03849		18.0565	22.8384	8.69206	22.8712		3.09011	3.80298	1.73533	2.61009	2.80963	0.433911
2022/10/30 16:46:06	2022/11/18 16:48:25	29.1759	13.6124	7.44626	11.4995		4.50048	3.04227	1.11571	2.54715	2.8014	0.698277		14.3968	9.12396	12.508	11.369		3.10151	3.1474	2.97687	2.73586	2.99041	0.0921818		14.5906	14.7143	29.513	9.73671		1.69072	3.90846	6.30568	2.22193	3.5317	1.03849		18.3579	22.8384	8.69206	22.8712		3.39153	3.80298	1.73533	2.61009	2.88498	0.456122
2022/10/30 16:51:06	2022/11/18 16:53:25	29.2848	13.6124	7.44626	11.4995		4.60937	3.04227	1.11571	2.54715	2.82863	0.720532		14.3968	9.12396	12.508	11.369		3.10151	3.1474	2.97687	2.73586	2.99041	0.0921818		14.5906	14.7143	29.513	9.73671		1.69072	3.90846	6.30568	2.22193	3.5317	1.03849		18.3594	22.8384	8.69206	22.8712		3.39302	3.80298	1.73533	2.61009	2.88536	0.45626
2022/10/30 16:56:06	2022/11/18 16:58:25	29.2848	13.6124	7.44626	11.4995		4.60937	3.04227	1.11571	2.54715	2.82863	0.720532		14.3968	9.12396	12.5286	11.369		3.10151	3.1474	2.9974	2.73586	2.99554	0.0920733		14.5906	14.7143	29.513	9.73671		1.69072	3.90846	6.30568	2.22193	3.5317	1.03849		18.3594	22.8384	8.69206	22.8712		3.39302	3.80298	1.73533	2.61009	2.88536	0.45626
2022/10/30 17:01:06	2022/11/18 17:03:25	29.2848	13.6124	7.44626	11.4995		4.60937	3.04227	1.11571	2.54715	2.82863	0.720532		14.3968	9.12396	12.5957	11.369		3.10151	3.1474	3.06455	2.73586	3.01233	0.093702		14.5906	14.7143	29.513	9.73671		1.69072	3.90846	6.30568	2.22193	3.5317	1.03849		18.3594	22.8384	8.69206	22.8712		3.39302	3.80298	1.73533	2.61009	2.88536	0.45626
2022/10/30 17:06:06	2022/11/18 17:08:25	29.2848	13.6124	7.44626	11.4995		4.60937	3.04227	1.11571	2.54715	2.82863	0.720532		14.3968	9.12396	12.6503	11.369		3.10151	3.1474	3.11916	2.73586	3.02598	0.0971685		14.5906	14.7143	29.513	9.73671		1.69072	3.90846	6.30568	2.22193	3.5317	1.03849		18.3594	22.8384	8.69206	22.8797		3.39302	3.80298	1.73533	2.61859	2.88748	0.455838
2022/10/30 17:11:06	2022/11/18 17:13:25	29.2848	13.6124	7.44626	11.4995		4.60937	3.04227	1.11571	2.54715	2.82863	0.720532		14.3968	9.12396	12.6547	11.369		3.10151	3.1474	3.1235	2.73586	3.02707	0.0975208		14.5906	14.7143	29.513	9.73671		1.69072	3.90846	6.30568	2.22193	3.5317	1.03849		18.3594	22.8451	8.69206	22.9316		3.39302	3.8097	1.73533	2.67047	2.90213	0.454582
2022/10/30 17:16:06	2022/11/18 17:18:25	29.321	13.6124	7.44656	11.508		4.64559	3.04227	1.116	2.55559	2.83986	0.727674		14.3968	9.12396	12.6547	11.369		3.10151	3.1474	3.1235	2.73586	3.02707	0.0975208		14.5906	14.7143	29.513	9.73671		1.69072	3.90846	6.30568	2.22193	3.5317	1.03849		18.3594	22.8812	8.69206	23.0592		3.39302	3.84583	1.73533	2.79807	2.94306	0.456169
2022/10/30 17:21:06	2022/11/18 17:23:25	29.3529	13.6124	7.46978	11.5425		4.6775	3.04227	1.13922	2.59009	2.86227	0.728608		14.3968	9.22475	12.6547	11.369		3.10151	3.24819	3.1235	2.73586	3.05226	0.110302		14.5906	14.7143	29.5142	9.73671		1.69072	3.90846	6.30687	2.22193	3.53199	1.03876		18.3594	22.8942	8.69206	23.1868		3.39302	3.85878	1.73533	2.92567	2.9782	0.455976
2022/10/30 17:26:06	2022/11/18 17:28:25	29.3529	13.6124	7.50614	11.5664		4.6775	3.04227	1.17559	2.61396	2.87733	0.720711		14.3968	9.23293	12.6547	11.369		3.10151	3.25637	3.1235	2.73586	3.05431	0.111525		14.5906	14.7143	29.5516	9.73721		1.69072	3.90846	6.34425	2.22243	3.54146	1.04704		18.3594	22.8942	8.69206	23.2674		3.39302	3.85878	1.73533	3.00627	2.99835	0.455648
2022/10/30 17:31:06	2022/11/18 17:33:25	29.3529	13.6124	7.51649	11.5669		4.6775	3.04227	1.18594	2.61449	2.88005	0.718661		14.3968	9.23342	12.6547	11.369		3.10151	3.25686	3.1235	2.73586	3.05443	0.1116		14.5906	14.7143	29.5732	9.75067		1.69072	3.90846	6.36592	2.23589	3.55025	1.05046		18.3594	22.8942	8.69206	23.2686		3.39302	3.85878	1.73533	3.00755	2.99867	0.45565
2022/10/30 17:36:06	2022/11/18 17:38:25	29.3529	13.6253	7.51649	11.5669		4.6775	3.05515	1.18594	2.61449	2.88327	0.71891		14.3968	9.23342	12.6547	11.369		3.10151	3.25686	3.1235	2.73586	3.05443	0.1116		14.6578	14.7143	29.5732	9.76211		1.75792	3.90846	6.36592	2.24732	3.56991	1.03942		18.3594	22.8942	8.69206	23.2686		3.39302	3.85878	1.73533	3.00755	2.99867	0.45565
2022/10/30 17:41:06	2022/11/18 17:43:25	29.3529	13.675	7.51649	11.5671		4.6775	3.10485	1.18594	2.61467	2.89574	0.720001		14.3968	9.23342	12.6547	11.3757		3.10151	3.25686	3.1235	2.74255	3.0561	0.110009		14.7078	14.7315	29.5863	9.76221		1.80793	3.92565	6.37895	2.24742	3.58999	1.03558		18.3594	22.8942	8.69245	23.2686		3.39302	3.85878	1.73572	3.00755	2.99877	0.45556
2022/10/30 17:46:06	2022/11/18 17:48:25	29.3529	13.6815	7.51649	11.5891		4.6775	3.1114	1.18594	2.63666	2.90287	0.719463		14.3968	9.23342	12.6547	11.3852		3.10151	3.25686	3.1235	2.75211	3.05849	0.107741		14.7078	14.8042	29.6342	9.76221		1.80793	3.99838	6.42693	2.24742	3.62017	1.0484		18.3594	22.8942	8.69742	23.2735		3.39302	3.85878	1.74069	3.01239	3.00122	0.45442
2022/10/30 17:51:06	2022/11/18 17:53:25	29.3529	13.6815	7.51649	11.6061		4.6775	3.1114	1.18594	2.65367	2.90713	0.71895		14.3968	9.23342	12.6547	11.3852		3.10151	3.25686	3.1235	2.75211	3.05849	0.107741		14.7078	14.8774	29.6375	9.76221		1.80793	4.0716	6.4302	2.24742	3.63929	1.05148		18.3594	22.9032	8.70095	23.3015		3.39302	3.86786	1.74422	3.04042	3.01138	0.455133
2022/10/30 17:56:06	2022/11/18 17:58:25	29.3529	13.6815	7.51649	11.6432		4.6775	3.1114	1.18594	2.69084	2.91642	0.717918		14.3981	9.23386	12.6547	11.3852		3.10282	3.2573	3.1235	2.75211	3.05893	0.107852		14.7103	14.8959	29.6375	9.76221		1.81041	4.09014	6.4302	2.24742	3.64454	1.05176		18.4905	23.0665	8.70096	23.3067		3.52414	4.03109	1.74423	3.04564	3.08627	0.490505
2022/10/30 18:01:06	2022/11/18 18:03:25	29.3529	13.6815	7.51649	11.6841		0	0	0	0	0	0		14.4044	7.549	12.6547	9.98521		0	0	0	0	0	0		14.7164	14.9361	29.6375	9.76221		0	0	0	0	0	0		20.9418	23.283	8.70096	26.3067		0	0	0	0	0	0
2022/10/30 18:06:06	2022/11/18 18:08:25	29.3529	13.6815	7.51649	11.6937		0	0	0	0.00965	0.0024125	0.0024125		14.4136	7.57122	12.6646	9.98521		0.00917	0.022222	0.00994	0	0.010333	0.00456094		14.7189	14.9841	29.6375	9.76221		0.0025	0.04799	0	0	0.0126225	0.0118039		20.9704	23.3641	8.70096	26.3067		0.02864	0.08115	0	0	0.0274475	0.0191314
2022/10/30 18:11:06	2022/11/18 18:13:25	29.4177	13.6815	7.52566	11.6937		0.0648	0	0.009169	0.00965	0.0209048	0.0147992		14.4136	7.58043	12.7094	9.98521		0.00919	0.031428	0.05471	0	0.023832	0.0122253		14.7232	14.986	29.6375	9.77104		0.00679	0.04982	1e-05	0.008837	0.0163642	0.0113103		20.9942	23.3641	8.70096	26.3067		0.05243	0.08115	0	0	0.033395	0.0201522
2022/10/30 18:16:06	2022/11/18 18:18:25	29.6804	13.6815	7.53773	11.6937		0.32752	0	0.02124	0.00965	0.0896025	0.0794246		14.4136	7.58043	12.7486	9.99356		0.00919	0.031428	0.09394	0.00835	0.035727	0.0201266		14.7251	14.986	29.7482	9.7972		0.00869	0.04982	0.11065	0.034989	0.0510372	0.021614		20.9948	23.3641	8.70096	26.3067		0.05305	0.08115	0	0	0.03355	0.0202015
2022/10/30 18:21:06	2022/11/18 18:23:25	29.7101	13.6815	7.5455	11.6937		0.3572	0	0.029008	0.00965	0.0989645	0.0862895		14.4136	7.58043	12.7747	10.0199		0.00919	0.031428	0.12007	0.03465	0.0488345	0.0244103		14.7251	14.986	29.8127	9.82101		0.00869	0.04982	0.17518	0.058802	0.073123	0.0357251		20.9948	23.4269	8.70096	26.3067		0.05305	0.14392	0	0	0.0492425	0.033946
2022/10/30 18:26:06	2022/11/18 18:28:25	29.7292	13.6819	7.58282	11.6937		0.37635	0.00039	0.066328	0.00965	0.11318	0.0889258		14.4136	7.58043	12.8302	10.0454		0.00919	0.031428	0.17549	0.0602	0.069077	0.0369757		14.7251	14.986	29.8127	9.83433		0.00869	0.04982	0.17518	0.072126	0.076454	0.0354341		20.9948	23.4876	8.70096	26.3067		0.05305	0.20464	0	0	0.0644225	0.0483828
2022/10/30 18:31:06	2022/11/18 18:33:25	29.8276	13.7223	7.62301	11.6937		0.47472	0.04073	0.106525	0.00965	0.157906	0.107518		14.4136	7.58043	12.832	10.0517		0.00919	0.031428	0.17735	0.06651	0.0711195	0.0373239		14.7251	14.986	29.8127	9.89368		0.00869	0.04982	0.17518	0.131478	0.091292	0.037854		20.9948	23.4876	8.70096	26.3067		0.05305	0.20464	0	0	0.0644225	0.0483828
2022/10/30 18:36:06	2022/11/18 18:38:25	29.9346	13.7889	7.66321	11.6937		0.58172	0.10739	0.146723	0.00965	0.211371	0.126768		14.4183	7.58043	12.832	10.0599	14.3883	0.01393	0.031428	0.17735	0.07473	0.0743595	0.0366311		14.7251	14.986	29.8127	9.95314		0.00869	0.04982	0.17523	0.190933	0.106168	0.0453061		20.9955	23.4876	8.72359	26.3215		0.05374	0.20464	0.022634	0.01477	0.073946	0.0443696
2022/10/30 18:41:06	2022/11/18 18:43:25	30.0237	13.8165	7.70341	11.6937		0.67083	0.13501	0.18692	0.00965	0.250603	0.144933		14.4229	7.58043	12.832	10.0901	14.3329	0.0185	0.031428	0.17735	0.10489	0.083042	0.0367435		14.7251	14.986	29.8567	9.96891		0.00869	0.04982	0.21923	0.206708	0.121112	0.0537549		21.055	23.4876	8.76883	26.417		0.1132	0.20464	0.067875	0.11023	0.123986	0.0288084
2022/10/30 18:46:06	2022/11/18 18:48:25	30.0401	13.8165	7.73445	11.6937		0.68723	0.13501	0.21796	0.00965	0.262463	0.147921		14.4231	7.58043	12.832	10.1126	14.3331	0.01875	0.031428	0.17735	0.12734	0.088717	0.0382153		14.7251	15.0152	29.9386	9.9725		0.00869	0.07905	0.30105	0.210292	0.14977	0.0654812		21.1283	23.4876	8.7727	26.4315		0.18653	0.20464	0.071738	0.12479	0.146924	0.0303351
2022/10/30 18:51:06	2022/11/18 18:53:25	30.0672	13.8165	7.73657	11.6937		0.71431	0.13501	0.220083	0.00965	0.269763	0.154355		14.4929	7.58043	12.8333	10.1127	14.4029	0.08846	0.031428	0.17864	0.12748	0.106502	0.0310987		14.7251	15.0921	30.0204	9.9725		0.00869	0.15591	0.38288	0.210292	0.189443	0.0772704		21.1326	23.5142	8.7727	26.4315		0.19086	0.23124	0.071738	0.12479	0.154657	0.0352883
2022/10/30 18:56:06	2022/11/18 18:58:25	30.2626	13.8165	7.73657	11.6937		0.90973	0.13501	0.220083	0.00965	0.318618	0.201721		14.5167	7.58043	12.8608	10.1127	14.4267	0.11235	0.031428	0.20611	0.12748	0.119342	0.0357918		14.7302	15.1696	30.0966	9.9725		0.01372	0.23345	0.45905	0.210292	0.229128	0.0911218		21.1326	23.5196	8.7727	26.4315		0.19086	0.23668	0.071738	0.12479	0.156017	0.0362843
2022/10/30 19:01:06	2022/11/18 19:03:25	30.3489	13.8165	7.73657	11.6937		0.99599	0.13501	0.220083	0.00965	0.340183	0.222833		14.5374	7.58043	12.8898	10.1127	14.4374	0.13302	0.031428	0.2351	0.12748	0.131757	0.0415988		14.7934	15.2355	30.1127	9.9725		0.07694	0.29932	0.4752	0.210292	0.265438	0.0835268		21.1326	23.5196	8.78276	26.433		0.19086	0.23668	0.081805	0.1263	0.158911	0.034251
2022/10/30 19:06:06	2022/11/18 19:08:25	30.3489	13.8174	7.73657	11.6937		0.99599	0.13592	0.220083	0.00965	0.340411	0.222763		14.5431	7.58043	12.8917	10.1127	14.3931	0.13873	0.031428	0.23702	0.12748	0.133665	0.0420303		14.8552	15.2499	30.1127	9.9725		0.13876	0.31374	0.4752	0.210292	0.284498	0.0730117		21.1326	23.5196	8.83193	26.4586		0.19086	0.23668	0.130971	0.15186	0.177593	0.0232793
2022/10/30 19:11:06	2022/11/18 19:13:25	30.3489	13.8617	7.73657	11.7167		0.99599	0.18021	0.220083	0.03268	0.357241	0.216697		14.5431	7.58043	12.8917	10.1127	14.3931	0.13873	0.031428	0.23702	0.12748	0.133665	0.0420303		14.8666	15.2547	30.1127	9.9725		0.15019	0.31855	0.4752	0.210292	0.288558	0.071301		21.1326	23.5196	8.8334	26.4648		0.19086	0.23668	0.132439	0.15803	0.179502	0.0224987
2022/10/30 19:16:06	2022/11/18 19:18:25	30.3489	13.8892	7.74464	11.7679		0.99599	0.20765	0.228148	0.08382	0.378902	0.208152		14.5431	7.60177	12.8917	10.1127	14.3931	0.13873	0.05277	0.23702	0.12748	0.139	0.0378333		14.9037	15.2547	30.1127	9.97889		0.18728	0.31855	0.4752	0.216682	0.299428	0.0649907		21.1326	23.5764	8.8334	26.4648		0.19086	0.29339	0.132439	0.15803	0.19368	0.0353216
2022/10/30 19:21:06	2022/11/18 19:23:25	30.3489	13.9425	7.81191	11.818		0.99599	0.26095	0.295421	0.13389	0.421563	0.1946		14.5431	7.63586	12.8917	10.1127	14.3931	0.13873	0.086863	0.23702	0.12748	0.147523	0.0318439		14.9081	15.2547	30.1127	10.0062		0.19168	0.31855	0.4752	0.243954	0.307346	0.0617101		21.1369	23.5992	8.8334	26.4648		0.19516	0.31618	0.132439	0.15803	0.200452	0.0406677
2022/10/30 19:26:06	2022/11/18 19:28:25	30.3489	13.9924	7.84254	11.8339		0.99599	0.31087	0.326054	0.1498	0.445679	0.187721		14.5431	7.63586	12.8934	10.1127	14.3931	0.13873	0.086863	0.23872	0.12748	0.147948	0.0322424		14.9094	15.2547	30.1127	10.0351		0.19297	0.31855	0.4752	0.272854	0.314893	0.0594027		21.1417	23.5992	8.8334	26.4648		0.19988	0.31618	0.132439	0.15803	0.201632	0.0406336
2022/10/30 19:31:06	2022/11/18 19:33:25	30.3608	14.0003	7.85233	11.8341		1.00794	0.3188	0.335842	0.15007	0.453163	0.189618		14.6168	7.63586	12.9407	10.1127	14.4668	0.21244	0.086863	0.28608	0.12748	0.178216	0.0444648		14.9094	15.2547	30.1127	10.063		0.19297	0.31855	0.4752	0.300804	0.321881	0.0581522		21.15	23.5992	8.8334	26.4648		0.20823	0.31618	0.132439	0.15803	0.20372	0.0406573
2022/10/30 19:36:06	2022/11/18 19:38:25	30.3973	14.0003	7.86088	11.8367		1.0444	0.3188	0.344394	0.15258	0.465044	0.197744		14.6763	7.63586	12.9532	10.1127	14.4763	0.27186	0.086863	0.29855	0.12748	0.196188	0.0523426		14.9094	15.2547	30.1127	10.0717		0.19297	0.31855	0.4752	0.309524	0.324061	0.0579292		21.1629	23.5992	8.8334	26.4914		0.22115	0.31618	0.132439	0.18469	0.213615	0.0387326
2022/10/30 19:41:06	2022/11/18 19:43:25	30.4345	14.0003	8.22282	11.8367		1.0816	0.3188	0.706327	0.15258	0.564827	0.207676		14.6764	7.63586	12.9532	10.1127	14.4764	0.27197	0.086863	0.29855	0.12748	0.196216	0.0523559		14.9094	15.2656	30.1127	10.078		0.19297	0.32945	0.4752	0.315754	0.328343	0.0577729		21.1659	23.5992	8.8334	26.5923		0.22409	0.31618	0.132439	0.2856	0.239577	0.0405221
2022/10/30 19:46:06	2022/11/18 19:48:25	30.4717	14.0003	8.52691	11.8367		1.11879	0.3188	1.01042	0.15258	0.650148	0.242691		14.6764	7.64854	12.9532	10.1127	14.4764	0.27197	0.099539	0.29855	0.12748	0.199385	0.0502011		14.9094	15.4071	30.1327	10.078		0.19297	0.47097	0.49521	0.315754	0.368726	0.070798		21.1659	23.5992	8.83409	26.6921		0.22409	0.31618	0.133137	0.38533	0.264684	0.0548937
2022/10/30 19:51:06	2022/11/18 19:53:25	30.4981	14.0003	8.52691	11.8367		1.14519	0.3188	1.01042	0.15258	0.656748	0.246991		14.6764	7.67908	12.9536	10.1127	14.4764	0.27197	0.130079	0.29895	0.12748	0.20712	0.0455669		14.9094	15.5868	30.1784	10.078		0.19297	0.65064	0.54089	0.315754	0.425063	0.10413		21.1659	23.5992	8.83607	26.716		0.22409	0.31618	0.135113	0.40931	0.271173	0.0590456
2022/10/30 19:56:06	2022/11/18 19:58:25	30.5613	14.0003	8.52691	11.8367		1.20836	0.3188	1.01042	0.15258	0.672541	0.257675		14.6764	7.67908	12.9768	10.1127	14.4764	0.27197	0.130079	0.32211	0.12748	0.21291	0.049642		14.9094	15.7171	30.2026	10.078		0.19297	0.7809	0.56506	0.315754	0.463671	0.131045		21.1659	23.5992	8.838	26.716		0.22409	0.31618	0.137043	0.40931	0.271656	0.0586758
2022/10/30 20:01:06	2022/11/18 20:03:25	30.7144	14.0003	8.52691	11.8367		1.36148	0.3188	1.01042	0.15258	0.71082	0.285545		14.6873	7.67908	13	10.1127	14.4873	0.28286	0.130079	0.34537	0.12748	0.221447	0.0550048		14.9094	15.7231	30.2741	10.078		0.19297	0.7869	0.63662	0.315754	0.483061	0.137853		21.1671	23.5992	8.83854	26.716		0.22535	0.31618	0.137579	0.40931	0.272105	0.0584887
2022/10/30 20:06:06	2022/11/18 20:08:25	30.8248	14.0003	8.52691	11.8367		1.47193	0.3188	1.01042	0.15258	0.738433	0.307044		14.699	7.67908	13.0005	10.1127	14.499	0.29465	0.130079	0.34579	0.12748	0.2245	0.0562439		14.9094	15.7231	30.3202	10.078		0.19297	0.7869	0.68269	0.315754	0.494578	0.142532		21.177	23.5992	8.83854	26.716		0.23517	0.31618	0.137579	0.40931	0.27456	0.0578829
2022/10/30 20:11:06	2022/11/18 20:13:25	30.8296	14.0381	8.52691	11.8773		1.47675	0.35653	1.01042	0.19321	0.759228	0.297276		14.699	7.67908	13.0005	10.1127	14.499	0.29465	0.130079	0.34579	0.12748	0.2245	0.0562439		14.9094	15.7234	30.3202	10.1011		0.19297	0.78726	0.68269	0.338884	0.500451	0.140273		21.177	23.5992	8.83854	26.716		0.23517	0.31618	0.137579	0.40931	0.27456	0.0578829
2022/10/30 20:16:06	2022/11/18 20:18:25	30.8521	14.1395	8.52691	11.9588		1.49917	0.45796	1.01042	0.27475	0.810576	0.277721		14.699	7.67908	13.0005	10.1127	14.499	0.29465	0.130079	0.34579	0.12748	0.2245	0.0562439		14.9174	15.7245	30.3202	10.1602		0.20099	0.78832	0.68269	0.397974	0.517494	0.133883		21.177	23.5993	8.83854	26.716		0.23517	0.31628	0.137579	0.40931	0.274585	0.0578889
2022/10/30 20:21:06	2022/11/18 20:23:25	30.8912	14.1551	8.52691	12.0399		1.53827	0.47357	1.01042	0.35584	0.844525	0.271604		14.7242	7.683	13.0076	10.1127	14.5242	0.31979	0.133999	0.35291	0.12748	0.233545	0.0597532		14.9733	15.7245	30.3202	10.2197		0.25687	0.78832	0.68269	0.457484	0.546341	0.118615		21.1824	23.6144	8.83854	26.716		0.24059	0.33144	0.137579	0.40931	0.27973	0.0585973
2022/10/30 20:26:06	2022/11/18 20:28:25	30.9034	14.1629	8.52691	12.0726		1.5505	0.48138	1.01042	0.3885	0.857701	0.268493		14.7327	7.68786	13.0657	10.1146	14.5127	0.32833	0.138856	0.41104	0.12939	0.251904	0.070092		15.0371	15.7245	30.3202	10.279		0.32067	0.78832	0.68269	0.516814	0.577123	0.102125		21.1931	23.7415	8.83854	26.716		0.25136	0.45851	0.137579	0.40931	0.31419	0.0736066
2022/10/30 20:31:06	2022/11/18 20:33:25	30.9034	14.1629	8.52691	12.0726		1.5505	0.48138	1.01042	0.3885	0.857701	0.268493		14.7327	7.68786	13.0807	10.1205	14.5127	0.32833	0.138856	0.42605	0.13528	0.257129	0.0721339		15.0954	15.7245	30.3202	10.3064		0.37898	0.78832	0.68269	0.544184	0.598543	0.0886279		21.1931	23.8198	8.83854	26.716		0.25136	0.53688	0.137579	0.40931	0.333782	0.0876747
2022/10/30 20:36:06	2022/11/18 20:38:25	30.9034	14.1629	8.52691	12.0726		1.5505	0.48138	1.01042	0.3885	0.857701	0.268493		14.7327	7.68786	13.0807	10.1264	14.5127	0.32833	0.138856	0.42605	0.14123	0.258616	0.0713069		15.1149	15.7245	30.3202	10.3339		0.3985	0.78832	0.68269	0.571734	0.610311	0.0833057		21.1931	23.8198	8.83854	26.716		0.25136	0.53688	0.137579	0.40931	0.333782	0.0876747
2022/10/30 20:41:06	2022/11/18 20:43:25	30.9034	14.1629	8.52691	12.0726		1.5505	0.48138	1.01042	0.3885	0.857701	0.268493		14.7327	7.68786	13.0807	10.1287	14.5127	0.32833	0.138856	0.42605	0.14346	0.259174	0.0710025		15.1199	15.7245	30.3596	10.3374		0.40352	0.78832	0.72213	0.575154	0.622281	0.0854479		21.1931	23.8198	8.83854	26.716		0.25136	0.53688	0.137579	0.40931	0.333782	0.0876747
2022/10/30 20:46:06	2022/11/18 20:48:25	30.9034	14.1629	8.52691	12.0726		1.5505	0.48138	1.01042	0.3885	0.857701	0.268493		14.7327	7.68786	13.0877	10.1287	14.5127	0.32833	0.138856	0.43304	0.14346	0.260921	0.0723797		15.1199	15.7245	30.495	10.3374		0.40352	0.78832	0.85745	0.575154	0.656111	0.10343		21.1931	23.8198	8.83854	26.716		0.25136	0.53688	0.137579	0.40931	0.333782	0.0876747
2022/10/30 20:51:06	2022/11/18 20:53:25	30.9034	14.1629	8.52691	12.0726		1.5505	0.48138	1.01042	0.3885	0.857701	0.268493		14.7327	7.71116	13.1199	10.1287	14.5127	0.32833	0.162159	0.46525	0.14346	0.2748	0.0758699		15.1199	15.7245	30.6346	10.3374		0.40352	0.78832	0.99706	0.575154	0.691013	0.128844		21.1931	23.8198	8.83854	26.716		0.25136	0.53688	0.137579	0.40931	0.333782	0.0876747
2022/10/30 20:56:06	2022/11/18 20:58:25	30.9034	14.1629	8.52691	12.0726		1.5505	0.48138	1.01042	0.3885	0.857701	0.268493		14.7327	7.71963	13.1199	10.1287	14.5127	0.32833	0.170633	0.46525	0.14346	0.276918	0.0748441		15.1199	15.7245	30.7698	10.3374		0.40352	0.78832	1.13226	0.575154	0.724814	0.15697		21.1931	23.8198	8.83854	26.7458		0.25136	0.53688	0.137579	0.43904	0.341215	0.0900907
2022/10/30 21:01:06	2022/11/18 21:03:25	30.9034	14.1629	8.52691	12.0726		1.5505	0.48138	1.01042	0.3885	0.857701	0.268493		14.7327	7.71963	13.1199	10.1287	14.5127	0.32833	0.170633	0.46525	0.14346	0.276918	0.0748441		15.1199	15.7245	30.8089	10.3374		0.40352	0.78832	1.17135	0.575154	0.734586	0.165498		21.1931	23.8198	8.83879	26.7569		0.25136	0.53688	0.137835	0.45013	0.344051	0.0910826
2022/10/30 21:06:06	2022/11/18 21:08:25	30.9034	14.1629	8.52691	12.0726		1.5505	0.48138	1.01042	0.3885	0.857701	0.268493		14.7541	7.71963	13.1199	10.1287	14.5041	0.34974	0.170633	0.46525	0.14346	0.282271	0.0762479		15.1199	15.7245	30.8089	10.3374		0.40352	0.78832	1.17135	0.575154	0.734586	0.165498		21.1931	23.8198	8.84002	26.757		0.25136	0.53688	0.139065	0.45029	0.344399	0.0908663
2022/10/30 21:11:06	2022/11/18 21:13:25	30.9034	14.1629	8.52691	12.0726		1.5505	0.48138	1.01042	0.3885	0.857701	0.268493		14.8155	7.71963	13.1199	10.1287	14.5655	0.41106	0.170633	0.46525	0.14346	0.297601	0.0820871		15.1199	15.7245	30.8089	10.3377		0.40352	0.78832	1.17135	0.575484	0.734668	0.165471		21.1931	23.8198	8.84033	26.7604		0.25136	0.53688	0.139372	0.45365	0.345315	0.091138
2022/10/30 21:16:06	2022/11/18 21:18:25	30.9034	14.1629	8.52691	12.0726		1.5505	0.48138	1.01042	0.3885	0.857701	0.268493		14.8159	7.72136	13.1199	10.5532	14.5659	0.41153	0.172361	0.46525	0.568	0.404285	0.0838454		15.1199	15.7245	30.8089	10.3631		0.40352	0.78832	1.17135	0.600854	0.741011	0.163548		21.1931	23.8198	8.84033	26.7649		0.25136	0.53688	0.139372	0.45818	0.346448	0.0915927
2022/10/30 21:21:06	2022/11/18 21:23:25	30.9034	14.1629	8.52691	12.0726		1.5505	0.48138	1.01042	0.3885	0.857701	0.268493		14.8159	7.73562	13.1223	10.5532	14.5659	0.41153	0.186617	0.4676	0.568	0.408437	0.0807126		15.1199	15.7423	30.8089	10.404		0.40352	0.8061	1.17135	0.641774	0.755686	0.161327		21.1931	23.8198	8.84033	26.7666		0.25136	0.53688	0.139372	0.45984	0.346863	0.0917622
2022/10/30 21:26:06	2022/11/18 21:28:25	30.9034	14.1629	8.52691	12.0726		1.5505	0.48138	1.01042	0.3885	0.857701	0.268493		14.8159	7.73569	13.1238	10.555	14.5659	0.41153	0.186686	0.46909	0.56976	0.409267	0.0810783		15.1345	15.8057	30.8127	10.4371		0.41805	0.86959	1.17521	0.674864	0.784428	0.159739		21.1931	23.8198	8.84054	26.7666		0.25136	0.53688	0.139579	0.45984	0.346915	0.0917232
2022/10/30 21:31:06	2022/11/18 21:33:25	30.9162	14.1629	8.52691	12.0726		1.56332	0.48138	1.01042	0.3885	0.860906	0.271254		14.8216	7.73569	13.1238	10.555	14.5716	0.41717	0.186686	0.46909	0.56976	0.410677	0.0811036		15.2368	15.8667	30.8345	10.4554		0.52034	0.93052	1.19703	0.693154	0.835261	0.147004		21.1931	23.8198	8.85008	26.7666		0.25136	0.53688	0.149124	0.45984	0.349301	0.0899389
2022/10/30 21:36:06	2022/11/18 21:38:25	30.9801	14.1629	8.52691	12.0746		1.62724	0.48138	1.01042	0.39054	0.877395	0.284871		14.8278	7.73569	13.1238	10.555	14.5479	0.42346	0.186686	0.46909	0.56976	0.412249	0.0811608		15.3524	15.8791	30.8345	10.9121		0.63595	0.94296	1.19703	1.14991	0.981464	0.127706		21.194	23.8198	8.85825	26.7666		0.2522	0.53688	0.157292	0.45984	0.351553	0.0883556
2022/10/30 21:41:06	2022/11/18 21:43:25	31.0494	14.1629	8.52691	12.1073		1.69648	0.48138	1.01042	0.42319	0.902868	0.295682		14.8609	7.73569	13.1273	10.555	14.5809	0.45647	0.186686	0.47264	0.56976	0.421389	0.0821365		15.3941	15.8791	30.8345	11.3802		0.67772	0.94296	1.19703	1.61798	1.10892	0.20008		21.1948	23.8198	8.85828	26.7666		0.25298	0.53688	0.157319	0.45984	0.351755	0.0882777
2022/10/30 21:46:06	2022/11/18 21:48:25	31.1186	14.1629	8.52691	12.1502		1.76572	0.48138	1.01042	0.46611	0.930908	0.305689		14.8638	7.73576	13.1706	10.555	14.5838	0.4594	0.186761	0.51593	0.56976	0.432963	0.0851035		15.3941	15.8791	30.8345	11.3802		0.67772	0.94296	1.19703	1.61798	1.10892	0.20008		21.1948	23.8198	8.85828	26.7666		0.25298	0.53688	0.157319	0.45984	0.351755	0.0882777
2022/10/30 21:51:06	2022/11/18 21:53:25	31.1876	14.1629	8.52691	12.1912		1.83466	0.48138	1.01042	0.50711	0.958393	0.316458		14.8641	7.77103	13.2009	10.555	14.5841	0.4597	0.222033	0.54619	0.56976	0.449421	0.0794023		15.3941	15.8865	30.8345	11.3804		0.67772	0.95039	1.19703	1.61822	1.11084	0.199626		21.1948	23.8198	8.85828	26.7666		0.25298	0.53688	0.157319	0.45984	0.351755	0.0882777
2022/10/30 21:56:06	2022/11/18 21:58:25	31.2275	14.1629	8.52691	12.2018		1.87458	0.48138	1.01042	0.51768	0.971016	0.324453		14.8648	7.77836	13.2066	10.555	14.5648	0.46037	0.229363	0.55197	0.56976	0.452866	0.0782601		15.3941	15.9244	30.8345	11.3858		0.67772	0.98824	1.19703	1.6236	1.12165	0.198434		21.1948	23.8198	8.85828	26.7666		0.25298	0.53688	0.157319	0.45984	0.351755	0.0882777
2022/10/30 22:01:06	2022/11/18 22:03:25	31.3398	14.1629	8.52691	12.2018		1.98693	0.48138	1.01042	0.51768	0.999103	0.350682		14.8718	7.77836	13.2122	10.555	14.5718	0.46739	0.229363	0.55754	0.56976	0.456013	0.0789228		15.3941	15.9405	30.8345	11.3858		0.67772	1.00436	1.19703	1.6236	1.12568	0.19757		21.1948	23.8198	8.85828	26.7666		0.25298	0.53688	0.157319	0.45984	0.351755	0.0882777
2022/10/30 22:06:06	2022/11/18 22:08:25	31.4567	14.3437	8.52691	12.228		2.10386	0.66217	1.01042	0.54398	1.08011	0.35532		14.8718	7.77836	13.2122	10.555	14.5718	0.46739	0.229363	0.55754	0.56976	0.456013	0.0789228		15.3941	15.9405	30.8384	11.3858		0.67772	1.00436	1.20089	1.6236	1.12664	0.197688		21.1948	23.8198	8.85828	26.7666		0.25298	0.53688	0.157319	0.45984	0.351755	0.0882777
2022/10/30 22:11:06	2022/11/18 22:13:25	31.4842	14.8125	8.52691	12.3121		2.13132	1.13094	1.01042	0.62805	1.22518	0.320502		14.8718	7.77836	13.2122	10.555	14.5718	0.46739	0.229363	0.55754	0.56976	0.456013	0.0789228		15.3941	15.9427	30.9091	11.3858		0.67772	1.00657	1.2716	1.6236	1.14487	0.200542		21.1948	23.8198	8.86656	26.7666		0.25298	0.53688	0.165599	0.45984	0.353825	0.0867694
2022/10/30 22:16:06	2022/11/18 22:18:25	31.6298	14.8125	8.53019	12.3933		2.27691	1.13094	1.0137	0.70924	1.2827	0.343111		14.8718	7.77836	13.2122	10.555	14.5718	0.46739	0.229363	0.55754	0.56976	0.456013	0.0789228		15.3941	15.9791	31.0041	11.3858		0.67772	1.04298	1.36658	1.6236	1.17772	0.204661		21.1948	23.8198	8.87559	26.7666		0.25298	0.53688	0.174629	0.45984	0.356082	0.0851513
2022/10/30 22:21:06	2022/11/18 22:23:25	31.8111	14.8125	8.54611	12.4122		2.45819	1.13094	1.02962	0.72809	1.33671	0.383491		14.8718	7.77836	13.2122	10.555	14.5718	0.46739	0.229363	0.55754	0.56976	0.456013	0.0789228		15.4594	16.0043	31.0991	11.3858		0.74292	1.06816	1.46157	1.6236	1.22406	0.198294		21.1948	23.8198	8.87559	26.7666		0.25298	0.53688	0.174629	0.45984	0.356082	0.0851513
2022/10/30 22:26:06	2022/11/18 22:28:25	31.8955	14.8125	8.56328	12.4122		2.54264	1.13094	1.04679	0.72809	1.36211	0.402958		14.8756	7.77836	13.2122	10.555	14.5256	0.4712	0.229363	0.55754	0.56976	0.456966	0.0789743		15.6972	16.0345	31.1941	11.3858		0.98079	1.09836	1.55656	1.6236	1.31483	0.161301		21.1948	23.8198	8.87559	26.7668		0.25298	0.53688	0.174629	0.46004	0.356132	0.0851716
2022/10/30 22:31:06	2022/11/18 22:33:25	31.8955	14.8125	8.58044	12.4175		2.54264	1.13094	1.06395	0.73342	1.36774	0.401156		14.905	7.77836	13.2122	10.555	14.555	0.50061	0.229363	0.55754	0.56976	0.464318	0.0797545		15.7785	16.047	31.289	11.3858		1.06206	1.11087	1.65154	1.6236	1.36202	0.159505		21.1948	23.8198	8.87559	26.7804		0.25298	0.53688	0.174629	0.47372	0.359552	0.0866187
2022/10/30 22:36:06	2022/11/18 22:38:25	31.8955	14.8125	8.59761	12.4598		2.54264	1.13094	1.08112	0.77575	1.38261	0.394566		14.905	7.77846	13.2122	10.555	14.555	0.50061	0.229456	0.55754	0.56976	0.464342	0.0797316		15.7833	16.047	31.3636	11.3858		1.06692	1.11087	1.72606	1.6236	1.38186	0.170669		21.1948	23.8198	8.87559	26.8022		0.25298	0.53688	0.174629	0.49546	0.364987	0.0891404
2022/10/30 22:41:06	2022/11/18 22:43:25	31.8955	14.8125	8.61477	12.5242		2.54264	1.13094	1.09828	0.8401	1.40299	0.385411		14.905	7.78641	13.2122	10.555	14.555	0.50061	0.237404	0.55754	0.56976	0.466329	0.0777813		15.8158	16.047	31.5032	11.3858		1.09932	1.11087	1.86569	1.6236	1.42487	0.191136		21.2057	23.8198	8.87559	26.8163		0.26397	0.53688	0.174629	0.50962	0.371275	0.0897907
2022/10/30 22:46:06	2022/11/18 22:48:25	31.8955	14.8125	8.63194	12.5305		2.54264	1.13094	1.11545	0.84643	1.40887	0.383527		14.905	7.78645	13.2122	10.555	14.555	0.50061	0.237444	0.55754	0.56976	0.466339	0.0777715		15.936	16.047	31.704	11.3858		1.21952	1.11087	2.06653	1.6236	1.50513	0.217221		21.2089	23.8198	8.87559	26.8166		0.26709	0.53688	0.174629	0.50992	0.37213	0.0895213
2022/10/30 22:51:06	2022/11/18 22:53:25	31.8955	14.8125	8.64911	12.5305		2.54264	1.13094	1.13262	0.84643	1.41316	0.382455		14.9133	7.78645	13.2122	10.555	14.5633	0.50891	0.237444	0.55754	0.56976	0.468414	0.0781033		16.3182	16.047	31.8081	11.3858		1.60179	1.11087	2.17061	1.6236	1.62672	0.216516		21.2092	23.8198	8.87559	26.8166		0.26743	0.53688	0.174629	0.50992	0.372215	0.0894881
2022/10/30 22:56:06	2022/11/18 22:58:25	31.935	14.8125	8.66591	12.5305		2.58212	1.13094	1.14942	0.84643	1.42723	0.391159		14.9383	7.78645	13.2436	10.555	14.5883	0.53389	0.237444	0.58892	0.56976	0.482504	0.0824787		16.415	16.0518	31.8082	11.3858		1.69857	1.11563	2.17064	1.6236	1.65211	0.215958		21.2151	23.8198	8.87559	26.8166		0.27327	0.53688	0.174629	0.50992	0.373675	0.0889284
2022/10/30 23:01:06	2022/11/18 23:03:25	32.0592	14.8125	8.68237	12.5305		2.7063	1.13094	1.16588	0.84643	1.46239	0.420763		14.9386	7.78645	13.2862	10.5551	14.5886	0.53423	0.237444	0.63154	0.56988	0.493274	0.087613		16.415	16.1651	31.8082	11.3858		1.69857	1.22895	2.17064	1.6236	1.68044	0.193153		21.2151	23.8198	8.87559	26.8166		0.27329	0.53688	0.174629	0.50992	0.37368	0.0889265
2022/10/30 23:06:06	2022/11/18 23:08:25	32.1731	14.8125	8.69836	12.5305		2.82018	1.13094	1.18187	0.84643	1.49485	0.447897		14.9641	7.78645	13.2902	10.5638	14.6141	0.55967	0.237444	0.63554	0.57857	0.502806	0.0899115		16.415	16.3125	31.8082	11.3858		1.69857	1.37631	2.17064	1.6236	1.71728	0.166063		21.2151	23.8198	8.87559	26.8166		0.27329	0.53688	0.174629	0.50992	0.37368	0.0889265
2022/10/30 23:11:06	2022/11/18 23:13:25	32.2042	14.8125	8.69836	12.5305		2.8513	1.13094	1.18187	0.84643	1.50263	0.455572		14.98	7.78645	13.293	10.5679	14.63	0.57559	0.237444	0.63835	0.58266	0.508511	0.091439		16.4873	16.3434	31.8082	11.3858		1.77083	1.40727	2.17064	1.6236	1.74309	0.160888		21.2151	23.8588	8.87559	26.8166		0.27329	0.57583	0.174629	0.50992	0.383417	0.0951955
2022/10/30 23:16:06	2022/11/18 23:18:25	32.2424	14.8125	8.69836	12.5305		2.88947	1.13094	1.18187	0.84643	1.51218	0.464991		14.98	7.78645	13.293	10.5679	14.63	0.57559	0.237444	0.63835	0.58266	0.508511	0.091439		16.9455	16.3456	31.8082	11.3895		2.22907	1.40943	2.17064	1.62729	1.85911	0.202046		21.2151	23.8763	8.87559	26.8166		0.27329	0.59334	0.174629	0.50992	0.387795	0.0981981
2022/10/30 23:21:06	2022/11/18 23:23:25	32.3737	14.8125	8.69836	12.5574		3.02082	1.13094	1.18187	0.87335	1.55174	0.494325		14.98	7.78885	13.293	10.5679	14.63	0.57559	0.239845	0.63835	0.58266	0.509111	0.0908459		16.9613	16.3508	31.8082	11.4016		2.24488	1.41461	2.17064	1.6394	1.86738	0.202371		21.2151	23.8763	8.87559	26.8166		0.27329	0.59334	0.174629	0.50992	0.387795	0.0981981
2022/10/30 23:26:06	2022/11/18 23:28:25	32.3997	14.8125	8.69836	12.7053		3.04685	1.13094	1.18187	1.02122	1.59522	0.485036		14.98	7.80968	13.293	10.5679	14.63	0.57559	0.260676	0.63835	0.58266	0.514319	0.0857045		16.9613	16.3508	31.8082	11.4025		2.24488	1.41462	2.17064	1.64031	1.86761	0.202283		21.2151	23.8763	8.87559	26.8166		0.27329	0.59334	0.174629	0.50992	0.387795	0.0981981
2022/10/30 23:31:06	2022/11/18 23:33:25	32.4345	14.8125	8.70136	12.7226		3.08157	1.13094	1.18487	1.03856	1.60899	0.49179		14.98	7.80968	13.293	10.5679	14.63	0.57559	0.260676	0.63835	0.58266	0.514319	0.0857045		16.9613	16.3508	31.8082	11.4025		2.24488	1.41462	2.17064	1.64031	1.86761	0.202283		21.2151	23.8763	8.87559	26.8166		0.27329	0.59334	0.174629	0.50992	0.387795	0.0981981
2022/10/30 23:36:06	2022/11/18 23:38:25	32.4345	14.8125	8.7311	12.7254		3.08157	1.13094	1.21461	1.04128	1.6171	0.489437		14.98	7.80968	13.293	10.5679	14.63	0.57559	0.260676	0.63835	0.58266	0.514319	0.0857045		16.9613	16.3508	31.8082	11.4025		2.24488	1.41462	2.17064	1.64031	1.86761	0.202283		21.2151	23.8763	8.87559	26.8166		0.27329	0.59334	0.174629	0.50992	0.387795	0.0981981
2022/10/30 23:41:06	2022/11/18 23:43:25	32.4345	14.8232	8.76715	12.7466		3.08157	1.14172	1.25066	1.06254	1.63412	0.484021		14.9863	7.80968	13.293	10.5679	14.6364	0.58196	0.260676	0.63835	0.58266	0.515912	0.0860979		16.9613	16.3508	31.8082	11.4025		2.24488	1.41462	2.17064	1.64031	1.86761	0.202283		21.2151	23.8763	8.87559	26.8166		0.27329	0.59334	0.174629	0.50992	0.387795	0.0981981
2022/10/30 23:46:06	2022/11/18 23:48:25	32.4345	14.858	8.8032	12.8395		3.08157	1.1765	1.28671	1.15545	1.67506	0.46972		14.9906	7.80968	13.293	10.5679	14.6206	0.58621	0.260676	0.63835	0.58266	0.516974	0.0863757		16.9613	16.3508	31.8082	11.4025		2.24488	1.41462	2.17064	1.64031	1.86761	0.202283		21.2151	23.8763	8.87559	26.8166		0.27329	0.59334	0.174629	0.50992	0.387795	0.0981981
2022/10/30 23:51:06	2022/11/18 23:53:25	32.4345	14.8707	8.83925	12.933		3.08157	1.1892	1.32276	1.24893	1.71062	0.4578		14.9969	7.80968	13.293	10.5679	14.6269	0.59252	0.260676	0.63835	0.58266	0.518552	0.0868105		16.9613	16.3508	31.8082	11.4025		2.24488	1.41462	2.17064	1.64031	1.86761	0.202283		21.2151	23.8763	8.87559	26.8166		0.27329	0.59334	0.174629	0.50992	0.387795	0.0981981
2022/10/30 23:56:06	2022/11/18 23:58:25	32.4345	14.8867	8.8753	12.9545		3.08157	1.20521	1.35881	1.27044	1.72901	0.451951		14.9969	7.80968	13.293	10.5679	14.6269	0.59252	0.260676	0.63835	0.58266	0.518552	0.0868105		16.9613	16.3508	31.8772	11.4025		2.24488	1.41462	2.23969	1.64031	1.88488	0.211433		21.2151	23.8763	8.87871	26.8166		0.27329	0.59334	0.177757	0.50992	0.388577	0.0976337
2022/10/31 00:01:06	2022/11/19 00:03:25	32.4345	14.8877	8.91135	12.9557		3.08157	1.20616	1.39486	1.27162	1.73855	0.449378		14.9969	7.80968	13.293	10.5679	14.6269	0.59252	0.260676	0.63835	0.58266	0.518552	0.0868105		16.9613	16.3508	31.8772	11.4025		2.24488	1.41462	2.23969	1.64031	1.88488	0.211433		21.2151	23.8763	8.89702	26.8166		0.27329	0.59334	0.196059	0.50992	0.393152	0.0943939
2022/10/31 00:06:06	2022/11/19 00:08:25	32.4345	14.8877	8.9474	12.956		3.08157	1.20616	1.43091	1.27194	1.74764	0.447137		14.9969	7.80968	13.293	10.5679	14.6269	0.59252	0.260676	0.63835	0.58266	0.518552	0.0868105		16.9613	16.3508	31.9043	11.4025		2.24488	1.41462	2.26683	1.64031	1.89166	0.215302		21.2151	23.8763	8.91275	26.8166		0.27329	0.59334	0.21179	0.50992	0.397085	0.0917002
2022/10/31 00:11:06	2022/11/19 00:13:25	32.4345	14.8877	8.97783	12.957		3.08157	1.20616	1.46134	1.27291	1.75549	0.445315		14.9969	7.80968	13.293	10.5679	14.6269	0.59252	0.260676	0.63835	0.58266	0.518552	0.0868105		16.9613	16.3548	31.9088	11.4025		2.24488	1.4187	2.27128	1.64031	1.89379	0.215198		21.2203	23.8763	8.91384	26.8166		0.27852	0.59334	0.212885	0.50992	0.398666	0.0909327
2022/10/31 00:16:06	2022/11/19 00:18:25	32.4345	14.8877	8.98134	12.9673		3.08157	1.20616	1.46485	1.28328	1.75897	0.44419		14.9969	7.80968	13.293	10.5679	14.6269	0.59252	0.260676	0.63835	0.58266	0.518552	0.0868105		16.9613	16.3958	31.9358	11.4025		2.24488	1.45967	2.29831	1.64031	1.91079	0.211828		21.2276	23.8763	8.91384	26.8166		0.28584	0.59334	0.212885	0.50992	0.400496	0.0901417
2022/10/31 00:21:06	2022/11/19 00:23:25	32.4345	14.8877	8.98136	12.9702		3.08157	1.20616	1.46487	1.28612	1.75968	0.443936		14.9969	7.80968	13.293	10.5679	14.6269	0.59252	0.260676	0.63835	0.58266	0.518552	0.0868105		16.9613	16.4456	31.9568	11.4031		2.24488	1.50946	2.31931	1.64092	1.92864	0.206382		21.2276	23.8763	8.91384	26.8166		0.28584	0.59334	0.212885	0.50992	0.400496	0.0901417
2022/10/31 00:26:06	2022/11/19 00:28:25	32.4345	14.8877	9.00093	12.9703		3.08157	1.20616	1.48444	1.28625	1.76461	0.442867		14.9969	7.80968	13.293	10.5679	14.6269	0.59252	0.260676	0.63835	0.58266	0.518552	0.0868105		16.9613	16.4954	31.9568	11.4261		2.24488	1.55924	2.31931	1.66394	1.94684	0.195326		21.2276	23.8763	8.91384	26.8166		0.28584	0.59334	0.212885	0.50992	0.400496	0.0901417
2022/10/31 00:31:06	2022/11/19 00:33:25	32.4345	14.8877	9.01892	12.9703		3.08157	1.20616	1.50243	1.28625	1.7691	0.44194		14.9969	7.80968	13.293	10.5679	14.6269	0.59252	0.260676	0.63835	0.58266	0.518552	0.0868105		16.9613	16.5444	31.9568	11.4605		2.24488	1.60826	2.31931	1.69827	1.96768	0.183086		21.2276	23.8763	8.91384	26.8166		0.28584	0.59334	0.212885	0.50992	0.400496	0.0901417
2022/10/31 00:36:06	2022/11/19 00:38:25	32.4345	14.8877	9.01988	12.9703		3.08157	1.20616	1.50339	1.28625	1.76934	0.441892		14.9969	7.80968	13.293	10.5679	14.6269	0.59252	0.260676	0.63835	0.58266	0.518552	0.0868105		16.9613	16.5614	31.9568	11.4924		2.24488	1.6252	2.31931	1.73023	1.97991	0.176437		21.2276	23.8855	8.91384	26.8166		0.28584	0.60254	0.212885	0.50992	0.402796	0.091796
2022/10/31 00:41:06	2022/11/19 00:43:25	32.4379	14.8877	9.01988	12.9703		3.08501	1.20616	1.50339	1.28625	1.7702	0.442744		14.9969	7.80968	13.2937	10.5679	14.6269	0.59252	0.260676	0.63906	0.58266	0.518729	0.0868923		16.9613	16.5614	31.9568	11.4992		2.24488	1.6252	2.31931	1.73701	1.9816	0.175644		21.2276	23.9391	8.91384	26.8166		0.28584	0.65616	0.212885	0.50992	0.416201	0.101937
2022/10/31 00:46:06	2022/11/19 00:48:25	32.524	14.8877	9.01988	12.9703		3.17113	1.20616	1.50339	1.28625	1.79173	0.464066		14.9969	7.80968	13.2969	10.5679	14.6269	0.59252	0.260676	0.64222	0.58266	0.519519	0.0872597		16.9613	16.5614	31.9568	11.4992		2.24488	1.6252	2.31931	1.73701	1.9816	0.175644		21.2276	23.9434	8.91384	26.8166		0.28584	0.66044	0.212885	0.50992	0.417271	0.102779
2022/10/31 00:51:06	2022/11/19 00:53:25	32.6447	14.8877	9.01988	12.9703		3.29182	1.20616	1.50339	1.28625	1.8219	0.493978		14.9969	7.80968	13.3193	10.5679	14.6269	0.59252	0.260676	0.66466	0.58266	0.525129	0.0900258		16.9613	16.5614	31.9568	11.4992		2.24488	1.6252	2.31931	1.73701	1.9816	0.175644		21.2276	23.9434	8.91384	26.8166		0.28584	0.66044	0.212885	0.50992	0.417271	0.102779
2022/10/31 00:56:06	2022/11/19 00:58:25	32.6936	14.8877	9.01988	12.9703		3.34076	1.20616	1.50339	1.28625	1.83414	0.506116		14.9969	7.80968	13.3355	10.5679	14.6269	0.59252	0.260676	0.68079	0.58266	0.529162	0.0921738		16.9613	16.5705	31.9568	11.4992		2.24488	1.63435	2.31931	1.73701	1.98389	0.174104		21.2393	23.9434	8.91449	26.8268		0.29748	0.66044	0.213534	0.52008	0.422883	0.102239
2022/10/31 01:01:06	2022/11/19 01:03:25	32.6936	14.8877	9.01988	12.9703		3.34076	1.20616	1.50339	1.28625	1.83414	0.506116		14.9969	7.80968	13.3355	10.5679	14.6269	0.59252	0.260676	0.68079	0.58266	0.529162	0.0921738		16.9613	16.5828	31.9568	11.4992		2.24488	1.64666	2.31931	1.73701	1.98697	0.17206		21.2852	23.9434	8.91646	26.8736		0.34339	0.66044	0.215498	0.56691	0.44656	0.101761
2022/10/31 01:06:06	2022/11/19 01:08:25	32.6936	14.9196	9.01988	12.9703		3.34076	1.23805	1.50339	1.28625	1.84211	0.502871		14.9969	7.80968	13.3355	10.5679	14.6269	0.59252	0.260676	0.68079	0.58266	0.529162	0.0921738		16.9613	16.5981	31.9568	11.4992		2.24488	1.6619	2.31931	1.73701	1.99078	0.169573		21.2877	23.9434	8.91805	26.8992		0.34592	0.66044	0.217089	0.59245	0.453975	0.103921
2022/10/31 01:11:06	2022/11/19 01:13:25	32.6936	14.9924	9.01988	12.9703		3.34076	1.31085	1.50339	1.28625	1.86031	0.495864		14.9992	7.80968	13.3355	10.5679	14.6192	0.59483	0.260676	0.68079	0.58266	0.529739	0.0923078		16.9729	16.5997	31.9568	11.4992		2.25645	1.66353	2.31931	1.73701	1.99408	0.170772		21.2877	23.9434	8.91818	26.9057		0.34592	0.66044	0.217218	0.59893	0.455627	0.104626
2022/10/31 01:16:06	2022/11/19 01:18:25	32.6936	15.0653	9.01988	12.9762		3.34076	1.38381	1.50339	1.29209	1.88001	0.488834		15.0003	7.80968	13.3355	10.5679	14.5303	0.59591	0.260676	0.68079	0.58266	0.530009	0.0923716		16.9866	16.5997	31.9568	11.4992		2.27021	1.66353	2.31931	1.73701	1.99752	0.172559		21.2877	23.9434	8.91818	26.9057		0.34592	0.66044	0.217218	0.59893	0.455627	0.104626
2022/10/31 01:21:06	2022/11/19 01:23:25	32.6936	15.1079	9.02382	13.041		3.34076	1.42639	1.50733	1.35688	1.90784	0.478628		15.0018	7.80968	13.3355	10.5679	14.5218	0.59745	0.260676	0.68079	0.58266	0.530394	0.092464		16.9866	16.5997	31.9568	11.4992		2.27021	1.66353	2.31931	1.73701	1.99752	0.172559		21.2877	23.9434	8.91818	26.9057		0.34592	0.66044	0.217218	0.59893	0.455627	0.104626
2022/10/31 01:26:06	2022/11/19 01:28:25	32.6936	15.1669	9.03815	13.1211		3.34076	1.48542	1.52166	1.43699	1.94621	0.465174		15.0018	7.80968	13.3355	10.5679	14.5218	0.59745	0.260676	0.68079	0.58266	0.530394	0.092464		16.988	16.5997	31.9568	11.4992		2.27158	1.66353	2.31931	1.73701	1.99786	0.17274		21.2877	23.9434	8.91818	26.9057		0.34592	0.66044	0.217218	0.59893	0.455627	0.104626
2022/10/31 01:31:06	2022/11/19 01:33:25	32.6936	15.1733	9.05303	13.1847		3.34076	1.49181	1.53654	1.50061	1.96743	0.457879		15.0018	7.80968	13.3355	10.5679	14.5218	0.59745	0.260676	0.68079	0.58266	0.530394	0.092464		16.9917	16.5997	31.9568	11.4992		2.27527	1.66353	2.31931	1.73701	1.99878	0.173229		21.2877	23.9434	8.91818	26.9057		0.34592	0.66044	0.217218	0.59893	0.455627	0.104626
2022/10/31 01:36:06	2022/11/19 01:38:25	32.6936	15.1733	9.0679	13.1898		3.34076	1.49181	1.55141	1.50575	1.97243	0.456286		15.0018	7.80968	13.3355	10.5679	14.5218	0.59745	0.260676	0.68079	0.58266	0.530394	0.092464		16.9917	16.5997	31.9568	11.4992		2.27527	1.66353	2.31931	1.73701	1.99878	0.173229		21.2877	23.9434	8.91818	26.9057		0.34592	0.66044	0.217218	0.59893	0.455627	0.104626
2022/10/31 01:41:06	2022/11/19 01:43:25	32.6936	15.1733	9.08278	13.1898		3.34076	1.49181	1.56629	1.50575	1.97615	0.455156		15.0018	7.80968	13.3355	10.5679	14.5218	0.59745	0.260676	0.68079	0.58266	0.530394	0.092464		17.0076	16.5997	31.9568	11.4992		2.29118	1.66353	2.31931	1.73701	2.00276	0.175378		21.2877	23.9434	8.91818	26.9057		0.34592	0.66044	0.217218	0.59893	0.455627	0.104626
2022/10/31 01:46:06	2022/11/19 01:48:25	32.6936	15.1733	9.09401	13.1898		3.34076	1.49181	1.57752	1.50575	1.97896	0.454321		15.0018	7.80968	13.3355	10.5679	14.5218	0.59745	0.260676	0.68079	0.58266	0.530394	0.092464		17.0115	16.5997	31.9596	11.4992		2.29507	1.66353	2.32214	1.73701	2.00444	0.176337		21.2877	23.9434	8.91818	26.9057		0.34592	0.66044	0.217218	0.59893	0.455627	0.104626
2022/10/31 01:51:06	2022/11/19 01:53:25	32.6936	15.1733	9.11911	13.2052		3.34076	1.49181	1.60262	1.52117	1.98909	0.451166		15.0018	7.80968	13.3355	10.5679	14.5218	0.59745	0.260676	0.68079	0.58266	0.530394	0.092464		17.0115	16.5997	32.0049	11.4992		2.29507	1.66353	2.36741	1.73701	2.01576	0.183357		21.2877	23.9434	8.91818	26.9057		0.34592	0.66044	0.217218	0.59893	0.455627	0.104626
2022/10/31 01:56:06	2022/11/19 01:58:25	32.6936	15.1733	9.16003	13.2431		3.34076	1.49181	1.64354	1.55901	2.00878	0.445077		15.0044	7.80968	13.3355	10.5679	14.5244	0.59999	0.260676	0.68079	0.58266	0.531029	0.0926195		17.0115	16.5997	32.0367	11.4992		2.29507	1.66353	2.39921	1.73701	2.02371	0.188538		21.2877	23.9434	8.91818	26.9057		0.34592	0.66044	0.217218	0.59893	0.455627	0.104626
2022/10/31 02:01:06	2022/11/19 02:03:25	32.7043	15.1733	9.19904	13.2432		3.35138	1.49181	1.68255	1.55912	2.02121	0.445144		15.0318	7.80968	13.3583	10.5679	14.5318	0.62741	0.260676	0.70363	0.58266	0.543594	0.0975557		17.0115	16.5997	32.0368	11.4992		2.29507	1.66353	2.39925	1.73701	2.02372	0.188545		21.2877	23.9434	8.91818	26.9057		0.34592	0.66044	0.217218	0.59893	0.455627	0.104626
2022/10/31 02:06:06	2022/11/19 02:08:25	32.7543	15.1733	9.20892	13.2432		3.40145	1.49181	1.69243	1.55912	2.0362	0.456988		15.0539	7.80968	13.3801	10.5679	14.5539	0.64952	0.260676	0.72543	0.58266	0.554572	0.102214		17.0127	16.6226	32.0368	11.4992		2.2963	1.68645	2.39925	1.73701	2.02975	0.185096		21.2877	23.9434	8.91818	26.9057		0.34592	0.66044	0.217218	0.59893	0.455627	0.104626
2022/10/31 02:11:06	2022/11/19 02:13:25	32.7906	15.1733	9.20892	13.2432		3.43767	1.49181	1.69243	1.55912	2.04526	0.466006		15.0539	7.82112	13.3801	10.5679	14.5539	0.64952	0.272119	0.72543	0.58266	0.557432	0.0994751		17.0382	16.6768	32.0368	11.4992		2.32178	1.74063	2.39925	1.73701	2.04967	0.180164		21.2877	23.9437	8.91818	26.9057		0.34592	0.66074	0.217218	0.59893	0.455702	0.104675
2022/10/31 02:16:06	2022/11/19 02:18:25	32.7916	15.1733	9.20892	13.2432		3.43866	1.49181	1.69243	1.55912	2.0455	0.466252		15.0539	7.8312	13.3801	10.5679	14.5539	0.64952	0.282198	0.72543	0.58266	0.559952	0.0970688		17.073	16.7311	32.0368	11.502		2.35657	1.79499	2.39925	1.7398	2.07265	0.176814		21.2877	23.9728	8.91818	26.9057		0.34592	0.68984	0.217218	0.59893	0.462977	0.109563
2022/10/31 02:21:06	2022/11/19 02:23:25	32.7916	15.1733	9.20892	13.2432		3.43866	1.49181	1.69243	1.55912	2.0455	0.466252		15.0539	7.8312	13.3801	10.5679	14.5539	0.64952	0.282198	0.72543	0.58266	0.559952	0.0970688		17.0877	16.7855	32.0368	11.5169		2.37128	1.84935	2.39925	1.7547	2.09365	0.169567		21.2877	24.0209	8.91818	26.9057		0.34592	0.73791	0.217218	0.59893	0.474994	0.118178
2022/10/31 02:26:06	2022/11/19 02:28:25	32.7916	15.1733	9.20892	13.2432		3.43866	1.49181	1.69243	1.55912	2.0455	0.466252		15.0539	7.8312	13.3801	10.5679	14.5539	0.64952	0.282198	0.72543	0.58266	0.559952	0.0970688		17.0877	16.8399	32.0368	11.5274		2.37128	1.90371	2.39925	1.76519	2.10986	0.161601		21.2877	24.0689	8.91818	26.9057		0.34592	0.78597	0.217218	0.59893	0.48701	0.127344
2022/10/31 02:31:06	2022/11/19 02:33:25	32.7916	15.1733	9.20892	13.2432		3.43866	1.49181	1.69243	1.55912	2.0455	0.466252		15.0539	7.8312	13.3801	10.5679	14.5539	0.64952	0.282198	0.72543	0.58266	0.559952	0.0970688		17.0877	16.8699	32.0368	11.5276		2.37128	1.9338	2.39925	1.76539	2.11743	0.158512		21.2877	24.1033	8.91818	26.9057		0.34592	0.82034	0.217218	0.59893	0.495602	0.134175
2022/10/31 02:36:06	2022/11/19 02:38:25	32.7916	15.1765	9.20892	13.2432		3.43866	1.49495	1.69243	1.55912	2.04629	0.465942		15.0539	7.8312	13.3843	10.5679	14.5539	0.64952	0.282198	0.72961	0.58266	0.560997	0.0976665		17.0877	16.87	32.0368	11.5276		2.37128	1.93388	2.39925	1.76539	2.11745	0.158504		21.2877	24.1047	8.91818	26.9057		0.34592	0.82178	0.217218	0.59893	0.495962	0.134465
2022/10/31 02:41:06	2022/11/19 02:43:25	32.7916	15.2297	9.20892	13.2432		3.43866	1.54822	1.69243	1.55912	2.05961	0.460852		15.0836	7.8312	13.4015	10.5679	14.5836	0.67917	0.282198	0.74678	0.58266	0.572702	0.102522		17.0877	16.87	32.0368	11.5276		2.37128	1.93388	2.39925	1.76539	2.11745	0.158504		21.2885	24.1047	8.91818	26.9057		0.34675	0.82178	0.217218	0.59893	0.49617	0.134388
2022/10/31 02:46:06	2022/11/19 02:48:25	32.7916	15.281	9.20892	13.2432		3.43866	1.59945	1.69243	1.55912	2.07241	0.45627		15.0865	7.8312	13.4035	10.5679	14.4465	0.68215	0.282198	0.74886	0.58266	0.573967	0.103076		17.0877	16.87	32.0368	11.5276		2.37128	1.93388	2.39925	1.76539	2.11745	0.158504		21.2924	24.1047	8.91818	26.9057		0.35061	0.82178	0.217218	0.59893	0.497135	0.134033
2022/10/31 02:51:06	2022/11/19 02:53:25	32.7916	15.2833	9.20892	13.2432		3.43866	1.60181	1.69243	1.55912	2.073	0.456066		15.0903	7.8312	13.4035	10.5679	14.4403	0.68595	0.282198	0.74886	0.58266	0.574917	0.103412		17.0877	16.87	32.0368	11.5276		2.37128	1.93388	2.39925	1.76539	2.11745	0.158504		21.2924	24.1047	8.91818	26.9057		0.35061	0.82178	0.217218	0.59893	0.497135	0.134033
2022/10/31 02:56:06	2022/11/19 02:58:25	32.7916	15.2833	9.20926	13.2432		3.43866	1.60181	1.69277	1.55912	2.07309	0.456042		15.0903	7.8312	13.4035	10.5679	14.4403	0.68595	0.282198	0.74886	0.58266	0.574917	0.103412		17.0909	16.87	32.0368	11.5276		2.37447	1.93388	2.39925	1.76539	2.11825	0.158931		21.2937	24.1047	8.91818	26.9057		0.35195	0.82178	0.217218	0.59893	0.497469	0.133912
2022/10/31 03:01:06	2022/11/19 03:03:25	32.7916	15.2833	9.2111	13.2432		3.43866	1.60181	1.69461	1.55912	2.07355	0.455915		15.0903	7.8312	13.4035	10.5679	14.4403	0.68595	0.282198	0.74886	0.58266	0.574917	0.103412		17.1229	16.87	32.0368	11.5276		2.4065	1.93388	2.39925	1.76539	2.12626	0.163374		21.3082	24.1047	8.91818	26.9057		0.36637	0.82178	0.217218	0.59893	0.501075	0.132649
2022/10/31 03:06:06	2022/11/19 03:08:25	32.7916	15.2833	9.2131	13.2432		3.43866	1.60181	1.69661	1.55912	2.07405	0.455776		15.0903	7.8312	13.4035	10.5699	14.4403	0.68595	0.282198	0.74886	0.58469	0.575425	0.103426		17.1618	16.87	32.0368	11.5276		2.44541	1.93388	2.39925	1.76539	2.13598	0.169124		21.3259	24.1047	8.91818	26.9057		0.38411	0.82178	0.217218	0.59893	0.50551	0.131214
2022/10/31 03:11:06	2022/11/19 03:13:25	32.7916	15.2833	9.21506	13.2432		3.43866	1.60181	1.69857	1.55912	2.07454	0.455641		15.0903	7.8312	13.4035	10.5821	14.4403	0.68595	0.282198	0.74886	0.59685	0.578465	0.103561		17.1811	16.87	32.0384	11.5276		2.46467	1.93388	2.40093	1.76539	2.14122	0.172314		21.3436	24.1047	8.91818	26.9057		0.40185	0.82178	0.217218	0.59893	0.509945	0.129914
2022/10/31 03:16:06	2022/11/19 03:18:25	32.7916	15.2833	9.21887	13.2432		3.43866	1.60181	1.70238	1.55912	2.07549	0.45538		15.0903	7.8312	13.4035	10.5821	14.4403	0.68595	0.282198	0.74886	0.59685	0.578465	0.103561		17.1811	16.87	32.144	11.5276		2.46467	1.93388	2.50646	1.76539	2.1676	0.186965		21.3532	24.1047	8.91818	26.9057		0.41144	0.82178	0.217218	0.59893	0.512342	0.12927
2022/10/31 03:21:06	2022/11/19 03:23:25	32.7916	15.2833	9.22121	13.2432		3.43866	1.60181	1.70472	1.55912	2.07608	0.455221		15.0903	7.8312	13.4035	10.5821	14.4403	0.68595	0.282198	0.74886	0.59685	0.578465	0.103561		17.1811	16.87	32.3111	11.5276		2.46467	1.93388	2.67355	1.76539	2.20937	0.214797		21.3532	24.1047	8.91818	26.9057		0.41146	0.82178	0.217218	0.59893	0.512347	0.129269
2022/10/31 03:26:06	2022/11/19 03:28:25	32.7916	15.2833	9.22121	13.2717		3.43866	1.60181	1.70472	1.58765	2.08321	0.452569		15.0903	7.8312	13.4035	10.5821	14.4403	0.68595	0.282198	0.74886	0.59685	0.578465	0.103561		17.1811	16.87	32.4107	11.5276		2.46467	1.93388	2.77321	1.76539	2.23429	0.233384		21.3532	24.1047	8.91818	26.9057		0.41146	0.82178	0.217218	0.59893	0.512347	0.129269
2022/10/31 03:31:06	2022/11/19 03:33:25	32.7916	15.2833	9.22121	13.3543		3.43866	1.60181	1.70472	1.6702	2.10385	0.445451		15.0903	7.8312	13.4035	10.5821	14.4403	0.68595	0.282198	0.74886	0.59685	0.578465	0.103561		17.1811	16.8722	32.4116	11.5276		2.46467	1.93601	2.77408	1.76541	2.23504	0.233321		21.3532	24.1047	8.91818	26.9057		0.41146	0.82178	0.217218	0.59893	0.512347	0.129269
2022/10/31 03:36:06	2022/11/19 03:38:25	32.7916	15.2833	9.22121	13.4252		3.43866	1.60181	1.70472	1.74111	2.12157	0.440018		15.0903	7.8312	13.4035	10.5821	14.4403	0.68595	0.282198	0.74886	0.59685	0.578465	0.103561		17.1811	16.8974	32.4116	11.5393		2.46467	1.96121	2.77408	1.77708	2.24426	0.228703		21.3532	24.1047	8.91818	26.9057		0.41146	0.82178	0.217218	0.59893	0.512347	0.129269
2022/10/31 03:41:06	2022/11/19 03:43:25	32.8195	15.2833	9.22121	13.4335		3.46661	1.60181	1.70472	1.74941	2.13064	0.446395		15.0906	7.8312	13.4035	10.5821	14.4406	0.68618	0.282198	0.74886	0.59685	0.578522	0.103581		17.1811	16.9288	32.4116	11.5566		2.46467	1.99268	2.77408	1.79439	2.25646	0.222555		21.3532	24.1047	8.91818	26.9057		0.41146	0.82178	0.217218	0.59893	0.512347	0.129269
2022/10/31 03:46:06	2022/11/19 03:48:25	32.8259	15.2833	9.22121	13.4335		3.47303	1.60181	1.70472	1.74941	2.13224	0.447996		15.0914	7.8312	13.4035	10.5821	14.4014	0.68705	0.282198	0.74886	0.59685	0.57874	0.103657		17.1811	16.9603	32.4116	11.5581		2.46467	2.02415	2.77408	1.79593	2.26471	0.219291		21.3532	24.1047	8.91818	26.9057		0.41146	0.82178	0.217218	0.59893	0.512347	0.129269
2022/10/31 03:51:06	2022/11/19 03:53:25	32.8259	15.2833	9.22121	13.4335		3.47303	1.60181	1.70472	1.74941	2.13224	0.447996		15.0973	7.8312	13.4035	10.5821	14.3473	0.69292	0.282198	0.74886	0.59685	0.580207	0.104177		17.1811	16.9774	32.4116	11.5581		2.46467	2.04127	2.77408	1.79593	2.26899	0.217762		21.3532	24.1047	8.91818	26.9057		0.41146	0.82178	0.217218	0.59893	0.512347	0.129269
2022/10/31 03:56:06	2022/11/19 03:58:25	32.8259	15.2833	9.22121	13.4335		3.47303	1.60181	1.70472	1.74941	2.13224	0.447996		15.1014	7.8312	13.4035	10.5821	14.3414	0.69702	0.282198	0.74886	0.59685	0.581232	0.104551		17.1811	16.9775	32.4116	11.5581		2.46467	2.0413	2.77408	1.79593	2.269	0.21776		21.3532	24.1095	8.91818	26.9057		0.41146	0.82656	0.217218	0.59893	0.513542	0.130224
2022/10/31 04:01:06	2022/11/19 04:03:25	32.8259	15.291	9.22121	13.4335		3.47303	1.60948	1.70472	1.74941	2.13416	0.447243		15.1014	7.8312	13.4095	10.5821	14.3414	0.69702	0.282198	0.75479	0.59685	0.582715	0.105351		17.1811	16.9775	32.4116	11.5581		2.46467	2.0413	2.77408	1.79593	2.269	0.21776		21.3532	24.1227	8.91818	26.9057		0.41146	0.83968	0.217218	0.59893	0.516822	0.132867
2022/10/31 04:06:06	2022/11/19 04:08:25	32.8259	15.3318	9.22121	13.4335		3.47303	1.65024	1.70472	1.74941	2.14435	0.443357		15.1014	7.8312	13.4477	10.5821	14.3414	0.69702	0.282198	0.79308	0.59685	0.592287	0.110854		17.1811	16.9775	32.4116	11.5581		2.46467	2.0413	2.77408	1.79593	2.269	0.21776		21.3532	24.1227	8.91818	26.9057		0.41146	0.83968	0.217218	0.59893	0.516822	0.132867
2022/10/31 04:11:06	2022/11/19 04:13:25	32.8259	15.3411	9.23292	13.4335		3.47303	1.65955	1.71643	1.74941	2.1496	0.441532		15.1014	7.8312	13.462	10.5821	14.3414	0.69702	0.282198	0.80732	0.59685	0.595847	0.113039		17.1811	16.9775	32.4116	11.5641		2.46467	2.0413	2.77408	1.80193	2.2705	0.216676		21.3532	24.1227	8.91818	26.9057		0.41146	0.83968	0.217218	0.59893	0.516822	0.132867
2022/10/31 04:16:06	2022/11/19 04:18:25	32.8259	15.3411	9.25136	13.4335		3.47303	1.65955	1.73487	1.74941	2.15422	0.440045		15.1014	7.8312	13.4777	10.5821	14.3414	0.69702	0.282198	0.82301	0.59685	0.59977	0.115526		17.1811	16.9839	32.4116	11.6308		2.46467	2.04771	2.77408	1.86857	2.28876	0.204357		21.3532	24.1227	8.91818	26.9057		0.41146	0.83968	0.217218	0.59893	0.516822	0.132867
2022/10/31 04:21:06	2022/11/19 04:23:25	32.8259	15.3411	9.25136	13.4557		3.47303	1.65955	1.73487	1.77165	2.15978	0.438373		15.1014	7.8312	13.4921	10.5821	14.3414	0.69702	0.282198	0.83742	0.59685	0.603372	0.117878		17.1811	17.0312	32.4513	11.7132		2.46467	2.09503	2.81382	1.95097	2.33112	0.193882		21.3532	24.1227	8.91818	26.9057		0.41146	0.83968	0.217218	0.59893	0.516822	0.132867
2022/10/31 04:26:06	2022/11/19 04:28:25	32.8259	15.3411	9.25136	13.5392		3.47303	1.65955	1.73487	1.85509	2.18064	0.432675		15.1014	7.8312	13.4945	10.5821	14.3414	0.69702	0.282198	0.83986	0.59685	0.603982	0.118283		17.1811	17.0348	32.636	11.7749		2.46467	2.09867	2.9985	2.0127	2.39364	0.224169		21.3532	24.1227	8.91818	26.9057		0.41146	0.83968	0.217218	0.59893	0.516822	0.132867
2022/10/31 04:31:06	2022/11/19 04:33:25	32.8259	15.3411	9.25136	13.6251		3.47303	1.65955	1.73487	1.94102	2.20212	0.427793		15.1014	7.8312	13.4945	10.5821	14.3414	0.69702	0.282198	0.83986	0.59685	0.603982	0.118283		17.2134	17.0348	32.6736	11.7784		2.49694	2.09867	3.03605	2.0162	2.41197	0.233003		21.3532	24.1227	8.91818	26.9057		0.41146	0.83968	0.217218	0.59893	0.516822	0.132867
2022/10/31 04:36:06	2022/11/19 04:38:25	32.8259	15.3411	9.25136	13.6561		3.47303	1.65955	1.73487	1.97207	2.20988	0.426282		15.1014	7.8312	13.4945	10.5821	14.3414	0.69702	0.282198	0.83986	0.59685	0.603982	0.118283		17.2366	17.0348	32.6736	11.7784		2.52015	2.09867	3.03605	2.0162	2.41777	0.233779		21.3532	24.1227	8.91818	26.9057		0.41146	0.83968	0.217218	0.59893	0.516822	0.132867
2022/10/31 04:41:06	2022/11/19 04:43:25	32.8378	15.3411	9.25136	13.6567		3.48488	1.65955	1.73487	1.97263	2.21298	0.429182		15.1143	7.8312	13.5063	10.5821	14.3543	0.70987	0.282198	0.85166	0.59685	0.610145	0.121106		17.2366	17.0348	32.6756	11.7784		2.52015	2.09867	3.03804	2.0162	2.41827	0.234218		21.3532	24.1227	8.91883	26.9268		0.41146	0.83968	0.217875	0.62003	0.522261	0.133928
2022/10/31 04:46:06	2022/11/19 04:48:25	32.8631	15.3411	9.25136	13.6777		3.51026	1.65955	1.73487	1.99364	2.22458	0.43449		15.1183	7.8312	13.5131	10.5821	14.2883	0.71395	0.282198	0.85845	0.59685	0.612862	0.122518		17.2366	17.0348	32.6903	11.7784		2.52015	2.09867	3.05284	2.0162	2.42197	0.237488		21.3532	24.1227	8.92026	26.994		0.41146	0.83968	0.219303	0.68728	0.539431	0.138705
2022/10/31 04:51:06	2022/11/19 04:53:25	32.8631	15.3411	9.25136	13.68		3.51026	1.65955	1.73487	1.99597	2.22516	0.434387		15.1331	7.8312	13.5131	10.5821	14.2831	0.7287	0.282198	0.85845	0.59685	0.61655	0.123583		17.2366	17.069	32.6903	11.7784		2.52015	2.13285	3.05284	2.0162	2.43051	0.233734		21.3532	24.1227	8.92137	27.0557		0.41146	0.83968	0.220409	0.749	0.555137	0.144693
2022/10/31 04:56:06	2022/11/19 04:58:25	32.9001	15.3411	9.25136	13.68		3.54726	1.65955	1.73487	1.99597	2.23441	0.443511		15.1331	7.8312	13.5131	10.5821	14.2831	0.7287	0.282198	0.85845	0.59685	0.61655	0.123583		17.2661	17.165	32.6903	11.7784		2.5497	2.22885	3.05284	2.0162	2.4619	0.22544		21.3532	24.1227	8.92177	27.1076		0.41146	0.83968	0.220813	0.80085	0.568201	0.150851
2022/10/31 05:01:06	2022/11/19 05:03:25	33.0002	15.3411	9.25136	13.68		3.64733	1.65955	1.73487	1.99597	2.25943	0.468214		15.1331	7.8312	13.5131	10.5821	14.2831	0.7287	0.282198	0.85845	0.59685	0.61655	0.123583		17.3438	17.2623	32.6903	11.7784		2.62741	2.32613	3.05284	2.0162	2.50565	0.220988		21.3532	24.1227	8.92316	27.2204		0.41146	0.83968	0.222201	0.9137	0.59676	0.166856
2022/10/31 05:06:06	2022/11/19 05:08:25	33.0226	15.3411	9.25136	13.68		3.66971	1.65955	1.73487	1.99597	2.26503	0.473743		15.1331	7.8312	13.5131	10.5821	14.2831	0.7287	0.282198	0.85845	0.59685	0.61655	0.123583		17.4222	17.3481	32.6932	11.7784		2.7058	2.41196	3.05565	2.0162	2.5474	0.22059		21.3614	24.1227	8.92316	27.3632		0.41959	0.83968	0.222201	1.05646	0.634483	0.190684
2022/10/31 05:11:06	2022/11/19 05:13:25	33.0226	15.3411	9.25136	13.68		3.66971	1.65955	1.73487	1.99597	2.26503	0.473743		15.1331	7.8312	13.5131	10.5821	14.2831	0.7287	0.282198	0.85845	0.59685	0.61655	0.123583		17.5006	17.361	32.7436	11.7784		2.7842	2.42486	3.10606	2.0162	2.58283	0.234581		21.3866	24.1227	8.92316	27.3844		0.4448	0.83968	0.222201	1.07763	0.646078	0.192333
2022/10/31 05:16:06	2022/11/19 05:18:25	33.0226	15.376	9.25136	13.68		3.66971	1.69451	1.73487	1.99597	2.27377	0.470086		15.1331	7.8312	13.5131	10.5821	14.2831	0.7287	0.282198	0.85845	0.59685	0.61655	0.123583		17.5508	17.361	32.8111	11.7784		2.83438	2.42486	3.17358	2.0162	2.61226	0.250802		21.407	24.1227	8.92316	27.402		0.46525	0.83968	0.222201	1.09531	0.65561	0.193928
2022/10/31 05:21:06	2022/11/19 05:23:25	33.0226	15.4083	9.25136	13.68		3.66971	1.72677	1.73487	1.99597	2.28183	0.466831		15.1331	7.8312	13.5131	10.5821	14.2831	0.7287	0.282198	0.85845	0.59685	0.61655	0.123583		17.6003	17.361	32.8786	11.7784		2.88387	2.42486	3.2411	2.0162	2.64151	0.267113		21.4087	24.1227	8.92316	27.402		0.4669	0.83968	0.222201	1.09531	0.656023	0.193794
2022/10/31 05:26:06	2022/11/19 05:28:25	33.0226	15.4083	9.25136	13.68		3.66971	1.72677	1.73487	1.99597	2.28183	0.466831		15.1331	7.8312	13.5135	10.5821	14.2831	0.7287	0.282198	0.85884	0.59685	0.616647	0.123646		17.6009	17.361	32.9334	11.7784		2.88445	2.42486	3.29586	2.0162	2.65534	0.277545		21.4192	24.1227	8.92316	27.402		0.47739	0.83968	0.222201	1.09531	0.658645	0.192957
2022/10/31 05:31:06	2022/11/19 05:33:25	33.0226	15.4083	9.25136	13.68		3.66971	1.72677	1.73487	1.99597	2.28183	0.466831		15.1331	7.8312	13.5228	10.5821	14.2831	0.7287	0.282198	0.86808	0.59685	0.618957	0.125167		17.6009	17.361	32.977	11.7784		2.88445	2.42486	3.33946	2.0162	2.66624	0.286015		21.4734	24.133	8.92316	27.402		0.53159	0.85003	0.222201	1.09531	0.674783	0.189932
2022/10/31 05:36:06	2022/11/19 05:38:25	33.0226	15.4083	9.25136	13.68		3.66971	1.72677	1.73487	1.99597	2.28183	0.466831		15.1331	7.8312	13.5356	10.5821	14.2831	0.7287	0.282198	0.88096	0.59685	0.622177	0.127326		17.6009	17.361	33.0627	11.7784		2.88445	2.42486	3.42517	2.0162	2.68767	0.303118		21.4797	24.1416	8.92316	27.402		0.53793	0.8586	0.222201	1.09531	0.67851	0.190205
2022/10/31 05:41:06	2022/11/19 05:43:25	33.0226	15.4083	9.25136	13.6855		3.66971	1.72677	1.73487	2.00141	2.28319	0.466556		15.1331	7.8312	13.5485	10.5821	14.2831	0.7287	0.282198	0.89383	0.59685	0.625395	0.129527		17.6009	17.3626	33.1485	11.7784		2.88445	2.42643	3.511	2.0162	2.70952	0.32065		21.4797	24.1416	8.92316	27.402		0.53793	0.8586	0.222201	1.09531	0.67851	0.190205
2022/10/31 05:46:06	2022/11/19 05:48:25	33.0226	15.4083	9.25136	13.7365		3.66971	1.72677	1.73487	2.0524	2.29594	0.464157		15.1382	7.8312	13.5572	10.5821	14.2882	0.73381	0.282198	0.9025	0.59685	0.62884	0.131369		17.6009	17.4819	33.2332	11.7784		2.88445	2.54576	3.59571	2.0162	2.76053	0.330786		21.4797	24.1416	8.92316	27.402		0.53793	0.8586	0.222201	1.09531	0.67851	0.190205
2022/10/31 05:51:06	2022/11/19 05:53:25	33.0226	15.4083	9.25136	13.7977		3.66971	1.72677	1.73487	2.11363	2.31125	0.461726		15.1452	7.8312	13.5618	10.5821	14.1952	0.74078	0.282198	0.90718	0.59685	0.631752	0.13265		17.6009	17.7617	33.2634	11.7784		2.88445	2.82556	3.62587	2.0162	2.83802	0.328938		21.4797	24.1416	8.92316	27.402		0.53793	0.8586	0.222201	1.09531	0.67851	0.190205
2022/10/31 05:56:06	2022/11/19 05:58:25	33.0226	15.4083	9.25136	13.8589		3.66971	1.72677	1.73487	2.17485	2.32655	0.459792		15.1851	7.8312	13.584	10.5821	14.2351	0.78075	0.282198	0.92937	0.59685	0.647292	0.139409		17.6009	17.7817	33.2634	11.7784		2.88445	2.84557	3.62587	2.0162	2.84302	0.328913		21.4797	24.1416	8.92316	27.402		0.53793	0.8586	0.222201	1.09531	0.67851	0.190205
2022/10/31 06:01:06	2022/11/19 06:03:25	33.0226	15.4083	9.25136	13.9141		3.66971	1.72677	1.73487	2.23002	2.34034	0.45848		15.1873	7.8312	13.6077	10.5821	14.2373	0.78291	0.282198	0.95301	0.59685	0.653742	0.143622		17.6009	17.788	33.2634	11.7784		2.88445	2.85181	3.62587	2.0162	2.84458	0.32892		21.4797	24.1461	8.92316	27.402		0.53793	0.86317	0.222201	1.09531	0.679653	0.190569
2022/10/31 06:06:06	2022/11/19 06:08:25	33.0226	15.4195	9.25136	13.9235		3.66971	1.73798	1.73487	2.23945	2.3455	0.457049		15.1896	7.8312	13.6157	10.5821	14.2396	0.7852	0.282198	0.96105	0.59685	0.656325	0.145194		17.6009	17.8223	33.2634	11.7784		2.88445	2.88617	3.62587	2.0162	2.85317	0.329095		21.4797	24.1946	8.92316	27.402		0.53793	0.91167	0.222201	1.09531	0.691778	0.1948
2022/10/31 06:11:06	2022/11/19 06:13:25	33.0226	15.8784	9.25136	13.9235		3.66971	2.19686	1.73487	2.23945	2.46022	0.419036		15.1917	7.8312	13.6157	10.5821	14.2417	0.78736	0.282198	0.96105	0.59685	0.656865	0.145354		17.6009	17.8601	33.2634	11.7784		2.88445	2.92393	3.62587	2.0162	2.86261	0.329546		21.4797	24.2541	8.92316	27.402		0.53793	0.97117	0.222201	1.09531	0.706653	0.20087
2022/10/31 06:16:06	2022/11/19 06:18:25	33.0226	16.1321	9.25136	13.9235		3.66971	2.45053	1.73487	2.23945	2.52364	0.410461		15.1923	7.8312	13.6157	10.5821	14.2423	0.78787	0.282198	0.96105	0.59685	0.656992	0.145393		17.6009	17.8875	33.2634	11.7784		2.88445	2.95131	3.62587	2.0162	2.86946	0.330041		21.4797	24.2913	8.92316	27.402		0.53793	1.00835	0.222201	1.09531	0.715948	0.20512
2022/10/31 06:21:06	2022/11/19 06:23:25	33.0226	16.1552	9.25136	13.9235		3.66971	2.47371	1.73487	2.23945	2.52944	0.410158		15.1923	7.8312	13.6157	10.5821	14.2423	0.78787	0.282198	0.96105	0.59685	0.656992	0.145393		17.6009	17.8887	33.2634	11.7784		2.88445	2.95257	3.62587	2.0162	2.86977	0.330067		21.4797	24.302	8.92316	27.402		0.53793	1.01905	0.222201	1.09531	0.718623	0.206405
2022/10/31 06:26:06	2022/11/19 06:28:25	33.0226	16.1724	9.25136	13.9235		3.66971	2.49085	1.73487	2.23945	2.53372	0.409986		15.1923	7.8312	13.6157	10.5821	14.2423	0.78787	0.282198	0.96105	0.59685	0.656992	0.145393		17.6009	17.8887	33.2634	11.7784		2.88445	2.95257	3.62587	2.0162	2.86977	0.330067		21.4853	24.3112	8.92316	27.402		0.54352	1.02827	0.222201	1.09531	0.722325	0.207126
2022/10/31 06:31:06	2022/11/19 06:33:25	33.0226	16.1724	9.25136	13.9235		3.66971	2.49085	1.73487	2.23945	2.53372	0.409986		15.1923	7.8312	13.6157	10.5821	14.2423	0.78787	0.282198	0.96105	0.59685	0.656992	0.145393		17.6009	17.8887	33.2634	11.7784		2.88445	2.95257	3.62587	2.0162	2.86977	0.330067		21.4908	24.3318	8.92316	27.402		0.54904	1.04879	0.222201	1.09531	0.728835	0.2093
2022/10/31 06:36:06	2022/11/19 06:38:25	33.0226	16.1724	9.25136	13.9235		3.66971	2.49085	1.73487	2.23945	2.53372	0.409986		15.1923	7.8312	13.6157	10.5821	14.2423	0.78787	0.282198	0.96105	0.59685	0.656992	0.145393		17.6009	17.8887	33.2634	11.7784		2.88445	2.95257	3.62587	2.0162	2.86977	0.330067		21.4908	24.3524	8.92316	27.402		0.54904	1.06939	0.222201	1.09531	0.733985	0.211971
2022/10/31 06:41:06	2022/11/19 06:43:25	33.0226	16.1724	9.25136	13.9235		3.66971	2.49085	1.73487	2.23945	2.53372	0.409986		15.1923	7.8312	13.6157	10.5821	14.2423	0.78787	0.282198	0.96105	0.59685	0.656992	0.145393		17.6009	17.8887	33.2634	11.7784		2.88445	2.95257	3.62587	2.0162	2.86977	0.330067		21.4908	24.3712	8.92316	27.402		0.54904	1.08822	0.222201	1.09531	0.738693	0.214491
2022/10/31 06:46:06	2022/11/19 06:48:25	33.0226	16.1724	9.25136	13.9235		3.66971	2.49085	1.73487	2.23945	2.53372	0.409986		15.1923	7.8312	13.6157	10.5821	14.2423	0.78787	0.282198	0.96105	0.59685	0.656992	0.145393		17.6009	17.8887	33.2634	11.7784		2.88445	2.95257	3.62587	2.0162	2.86977	0.330067		21.4908	24.3747	8.92316	27.402		0.54904	1.09174	0.222201	1.09531	0.739573	0.21497
2022/10/31 06:51:06	2022/11/19 06:53:25	33.0226	16.1724	9.25136	13.9235		3.66971	2.49085	1.73487	2.23945	2.53372	0.409986		15.1923	7.8312	13.6157	10.5821	14.2423	0.78787	0.282198	0.96105	0.59685	0.656992	0.145393		17.6009	17.8887	33.2634	11.7784		2.88445	2.95257	3.62587	2.0162	2.86977	0.330067		21.4931	24.3747	8.92316	27.402		0.55129	1.09174	0.222201	1.09531	0.740135	0.214805
2022/10/31 06:56:06	2022/11/19 06:58:25	33.0226	16.1724	9.25136	13.9235		3.66971	2.49085	1.73487	2.23945	2.53372	0.409986		15.1923	7.8312	13.6157	10.5821	14.2423	0.78787	0.282198	0.96105	0.59685	0.656992	0.145393		17.6009	17.8887	33.2634	11.7784		2.88445	2.95257	3.62587	2.0162	2.86977	0.330067		21.5018	24.3747	8.92316	27.402		0.56004	1.09174	0.222201	1.09531	0.742323	0.214174
2022/10/31 07:01:06	2022/11/19 07:03:25	33.0226	16.1724	9.25136	13.9235		3.66971	2.49085	1.73487	2.23945	2.53372	0.409986		15.1923	7.8312	13.6157	10.5821	14.2423	0.78787	0.282198	0.96105	0.59685	0.656992	0.145393		17.6009	17.8887	33.2634	11.7784		2.88445	2.95257	3.62587	2.0162	2.86977	0.330067		21.5107	24.3747	8.92316	27.402		0.56889	1.09174	0.222201	1.09531	0.744535	0.213557
2022/10/31 07:06:06	2022/11/19 07:08:25	33.0226	16.1724	9.25136	13.9235		3.66971	2.49085	1.73487	2.23945	2.53372	0.409986		15.1923	7.8312	13.6157	10.5821	14.2423	0.78787	0.282198	0.96105	0.59685	0.656992	0.145393		17.6019	17.8887	33.2634	11.7784		2.88543	2.95257	3.62587	2.0162	2.87002	0.330071		21.5132	24.3747	8.92316	27.402		0.57141	1.09174	0.222201	1.09531	0.745165	0.213385
2022/10/31 07:11:06	2022/11/19 07:13:25	33.0226	16.1724	9.25136	13.9235		3.66971	2.49085	1.73487	2.23945	2.53372	0.409986		15.1923	7.8312	13.6172	10.5821	14.2423	0.78787	0.282198	0.96254	0.59685	0.657365	0.145652		17.6424	17.8887	33.2634	11.7784		2.92599	2.95257	3.62587	2.0162	2.88016	0.330384		21.5132	24.3747	8.92316	27.402		0.57141	1.09174	0.222201	1.09531	0.745165	0.213385
2022/10/31 07:16:06	2022/11/19 07:18:25	33.0226	16.1724	9.25136	13.9235		3.66971	2.49085	1.73487	2.23945	2.53372	0.409986		15.1923	7.8312	13.6197	10.5821	14.2423	0.78787	0.282198	0.96508	0.59685	0.658	0.146097		17.7036	17.8887	33.2634	11.7798		2.98721	2.95257	3.62587	2.01755	2.8958	0.331147		21.5132	24.3747	8.92316	27.5285		0.57141	1.09174	0.222201	1.22179	0.776785	0.232194
2022/10/31 07:21:06	2022/11/19 07:23:25	33.0226	16.1724	9.25136	13.9235		3.66971	2.49085	1.73487	2.23945	2.53372	0.409986		15.1923	7.8312	13.6197	10.5821	14.2423	0.78787	0.282198	0.96508	0.59685	0.658	0.146097		17.7516	17.8887	33.2634	11.8357		3.03517	2.95257	3.62587	2.07345	2.92177	0.320053		21.5132	24.3747	8.92316	27.5773		0.57141	1.09174	0.222201	1.27057	0.78898	0.240168
2022/10/31 07:26:06	2022/11/19 07:28:25	33.0226	16.1724	9.25136	13.9235		3.66971	2.49085	1.73487	2.23945	2.53372	0.409986		15.2155	7.8312	13.6197	10.5821	14.2655	0.81108	0.282198	0.96508	0.59685	0.663802	0.14792		17.7552	17.8887	33.2634	11.9201		3.03874	2.95257	3.62587	2.15785	2.94376	0.301665		21.5132	24.3747	8.92316	27.5773		0.57141	1.09174	0.222201	1.27057	0.78898	0.240168
2022/10/31 07:31:06	2022/11/19 07:33:25	33.0226	16.1724	9.25136	13.9235		3.66971	2.49085	1.73487	2.23945	2.53372	0.409986		15.2205	7.8312	13.6197	10.5821	14.2405	0.81614	0.282198	0.96508	0.59685	0.665067	0.148344		17.7552	17.8887	33.2634	11.9671		3.03874	2.95257	3.62587	2.20484	2.95551	0.291522		21.5132	24.3747	8.92316	27.5773		0.57141	1.09174	0.222201	1.27057	0.78898	0.240168
2022/10/31 07:36:06	2022/11/19 07:38:25	33.0226	16.1724	9.25136	13.9235		3.66971	2.49085	1.73487	2.23945	2.53372	0.409986		15.2205	7.8312	13.6197	10.5821	14.2405	0.81614	0.282198	0.96508	0.59685	0.665067	0.148344		17.7552	17.8887	33.2762	11.9672		3.03874	2.95257	3.63869	2.20498	2.95875	0.293956		21.5132	24.3747	8.92316	27.5773		0.57141	1.09174	0.222201	1.27057	0.78898	0.240168
2022/10/31 07:41:06	2022/11/19 07:43:25	33.0226	16.1724	9.25136	14.0972		3.66971	2.49085	1.73487	2.41313	2.57714	0.401815		15.2205	7.8312	13.6197	10.5821	14.2405	0.81614	0.282198	0.96508	0.59685	0.665067	0.148344		17.7552	17.8887	33.3979	11.9672		3.03874	2.95257	3.7604	2.20498	2.98917	0.318007		21.5132	24.3747	8.92316	27.5773		0.57141	1.09174	0.222201	1.27057	0.78898	0.240168
2022/10/31 07:46:06	2022/11/19 07:48:25	33.0226	16.1724	9.25136	14.0972		3.66971	2.49085	1.73487	2.41313	2.57714	0.401815		15.2205	7.8312	13.6197	10.5821	14.2405	0.81614	0.282198	0.96508	0.59685	0.665067	0.148344		17.7552	17.8887	33.5444	11.9672		3.03874	2.95257	3.90688	2.20498	3.02579	0.348278		21.5132	24.3747	8.92316	27.5773		0.57141	1.09174	0.222201	1.27057	0.78898	0.240168
2022/10/31 07:51:06	2022/11/19 07:53:25	33.0226	16.1763	9.25136	14.1821		3.66971	2.49475	1.73487	2.49807	2.59935	0.399394		15.2205	7.8312	13.6197	10.5821	14.2405	0.81614	0.282198	0.96508	0.59685	0.665067	0.148344		17.7552	17.8887	33.6909	11.9672		3.03874	2.95257	4.05336	2.20498	3.06241	0.379669		21.5132	24.3747	8.92316	27.5773		0.57141	1.09174	0.222201	1.27057	0.78898	0.240168
2022/10/31 07:56:06	2022/11/19 07:58:25	33.0226	16.3269	9.25136	14.1875		3.66971	2.64538	1.73487	2.50346	2.63836	0.397724		15.2205	7.8312	13.6197	10.5821	14.2405	0.81614	0.282198	0.96508	0.59685	0.665067	0.148344		17.7552	17.8887	33.7834	11.9672		3.03874	2.95257	4.14589	2.20498	3.08555	0.399958		21.5132	24.3747	8.92316	27.5773		0.57141	1.09174	0.222201	1.27057	0.78898	0.240168
2022/10/31 08:01:06	2022/11/19 08:03:25	33.0226	16.3374	9.25136	14.1887		3.66971	2.65588	1.73487	2.50464	2.64128	0.397715		15.2205	7.8312	13.6197	10.5821	14.2405	0.81614	0.282198	0.96508	0.59685	0.665067	0.148344		17.7552	18.1622	33.7849	11.9672		3.03874	3.22609	4.14736	2.20498	3.15429	0.398526		21.5132	24.3747	8.92316	27.5773		0.57141	1.09174	0.222201	1.27057	0.78898	0.240168
2022/10/31 08:06:06	2022/11/19 08:08:25	33.0226	16.3374	9.25136	14.1887		3.66971	2.65588	1.73487	2.50464	2.64128	0.397715		15.2205	7.8312	13.6197	10.5821	14.2405	0.81614	0.282198	0.96508	0.59685	0.665067	0.148344		17.7552	18.5374	33.7849	11.9672		3.03874	3.60122	4.14736	2.20498	3.24808	0.414858		21.5132	24.3923	8.92316	27.5773		0.57141	1.10935	0.222201	1.27057	0.793383	0.242051
2022/10/31 08:11:06	2022/11/19 08:13:25	33.0226	16.3374	9.25136	14.1887		3.66971	2.65588	1.73487	2.50464	2.64128	0.397715		15.2205	7.8312	13.6197	10.5821	14.2405	0.81614	0.282198	0.96508	0.59685	0.665067	0.148344		17.7552	18.5374	33.7849	11.9672		3.03874	3.60122	4.14736	2.20498	3.24808	0.414858		21.5132	24.442	8.92316	27.5773		0.57141	1.159	0.222201	1.27057	0.805795	0.247704
2022/10/31 08:16:06	2022/11/19 08:18:25	33.0226	16.3374	9.25136	14.1887		3.66971	2.65588	1.73487	2.50464	2.64128	0.397715		15.2205	7.8312	13.6212	10.5821	14.2405	0.81614	0.282198	0.96657	0.59685	0.66544	0.148596		17.7552	18.5374	33.7849	11.9672		3.03874	3.60122	4.14736	2.20498	3.24808	0.414858		21.5132	24.4604	8.92316	27.5773		0.57141	1.17747	0.222201	1.27057	0.810413	0.249932
2022/10/31 08:21:06	2022/11/19 08:23:25	33.0226	16.3374	9.25136	14.1887		3.66971	2.65588	1.73487	2.50464	2.64128	0.397715		15.2205	7.8312	13.6375	10.5821	14.2405	0.81614	0.282198	0.98281	0.59685	0.6695	0.151368		17.7552	18.5374	33.7849	11.9672		3.03874	3.60122	4.14736	2.20498	3.24808	0.414858		21.5132	24.4604	8.92316	27.5773		0.57141	1.17747	0.222201	1.27057	0.810413	0.249932
2022/10/31 08:26:06	2022/11/19 08:28:25	33.0226	16.3374	9.25136	14.1887		3.66971	2.65588	1.73487	2.50464	2.64128	0.397715		15.2205	7.8312	13.6512	10.5821	14.2405	0.81614	0.282198	0.99656	0.59685	0.672937	0.15376		17.7552	18.5374	33.7849	11.9672		3.03874	3.60122	4.14736	2.20498	3.24808	0.414858		21.5132	24.5358	8.92316	27.5773		0.57141	1.25282	0.222201	1.27057	0.82925	0.259674
2022/10/31 08:31:06	2022/11/19 08:33:25	33.0226	16.3374	9.25136	14.1887		3.66971	2.65588	1.73487	2.50464	2.64128	0.397715		15.2205	7.8312	13.6517	10.5821	14.2405	0.81614	0.282198	0.99699	0.59685	0.673045	0.153835		17.7552	18.5374	33.7849	11.9672		3.03874	3.60122	4.14736	2.20498	3.24808	0.414858		21.5132	24.5656	8.92316	27.5773		0.57141	1.28261	0.222201	1.27057	0.836698	0.263797
2022/10/31 08:36:06	2022/11/19 08:38:25	33.0226	16.3374	9.25136	14.1887		3.66971	2.65588	1.73487	2.50464	2.64128	0.397715		15.2205	7.8312	13.6517	10.5821	14.2405	0.81614	0.282198	0.99699	0.59685	0.673045	0.153835		17.7552	18.5374	33.7849	11.9672		3.03874	3.60122	4.14736	2.20498	3.24808	0.414858		21.5132	24.5656	8.92316	27.5773		0.57141	1.28261	0.222201	1.27057	0.836698	0.263797
2022/10/31 08:41:06	2022/11/19 08:43:25	33.0226	16.3374	9.25136	14.1887		3.66971	2.65588	1.73487	2.50464	2.64128	0.397715		15.2615	7.8312	13.6517	10.5821	14.2615	0.8571	0.282198	0.99699	0.59685	0.683285	0.157312		17.7552	18.5374	33.7849	12.0015		3.03874	3.60122	4.14736	2.23925	3.25664	0.407704		21.5132	24.5656	8.92316	27.5773		0.57141	1.28261	0.222201	1.27057	0.836698	0.263797
2022/10/31 08:46:06	2022/11/19 08:48:25	33.0226	16.3374	9.25136	14.1887		3.66971	2.65588	1.73487	2.50464	2.64128	0.397715		15.2795	7.8312	13.6517	10.5821	14.2695	0.87513	0.282198	0.99699	0.59685	0.687792	0.159027		17.7552	18.5374	33.7849	12.0813		3.03874	3.60122	4.14736	2.31913	3.27661	0.39125		21.5132	24.5656	8.92316	27.5773		0.57141	1.28261	0.222201	1.27057	0.836698	0.263797
2022/10/31 08:51:06	2022/11/19 08:53:25	33.0226	16.3374	9.25136	14.1887		3.66971	2.65588	1.73487	2.50464	2.64128	0.397715		15.2795	7.8312	13.6517	10.5821	14.2695	0.87513	0.282198	0.99699	0.59685	0.687792	0.159027		17.7552	18.5374	33.7849	12.1437		3.03874	3.60122	4.14736	2.38153	3.29221	0.378632		21.5132	24.5656	8.92316	27.5773		0.57141	1.28261	0.222201	1.27057	0.836698	0.263797
2022/10/31 08:56:06	2022/11/19 08:58:25	33.0226	16.3374	9.25136	14.1887		3.66971	2.65588	1.73487	2.50464	2.64128	0.397715		15.2795	7.8312	13.6517	10.5821	14.2695	0.87513	0.282198	0.99699	0.59685	0.687792	0.159027		17.7552	18.5374	33.7849	12.1482		3.03874	3.60122	4.14736	2.38602	3.29334	0.377733		21.5132	24.5656	8.92316	27.5773		0.57141	1.28261	0.222201	1.27057	0.836698	0.263797
2022/10/31 09:01:06	2022/11/19 09:03:25	33.0226	16.3374	9.25136	14.1887		3.66971	2.65588	1.73487	2.50464	2.64128	0.397715		15.2795	7.8312	13.6517	10.5821	14.2695	0.87513	0.282198	0.99699	0.59685	0.687792	0.159027		17.7552	18.5374	33.8044	12.1482		3.03874	3.60122	4.16685	2.38602	3.29821	0.381418		21.5132	24.5656	8.92316	27.5773		0.57141	1.28261	0.222201	1.27057	0.836698	0.263797
2022/10/31 09:06:06	2022/11/19 09:08:25	33.0226	16.3374	9.25136	14.1887		3.66971	2.65588	1.73487	2.50464	2.64128	0.397715		15.2795	7.8312	13.6517	10.5821	14.2695	0.87513	0.282198	0.99699	0.59685	0.687792	0.159027		17.7552	18.5374	33.9258	12.1482		3.03874	3.60122	4.28831	2.38602	3.32857	0.404952		21.5132	24.5656	8.92316	27.5773		0.57141	1.28261	0.222201	1.27057	0.836698	0.263797
2022/10/31 09:11:06	2022/11/19 09:13:25	33.0226	16.3374	9.25136	14.1887		3.66971	2.65588	1.73487	2.50464	2.64128	0.397715		15.2795	7.8312	13.6517	10.5821	14.2695	0.87513	0.282198	0.99699	0.59685	0.687792	0.159027		17.8077	18.5374	34.0565	12.1482		3.09124	3.60122	4.41897	2.38602	3.37436	0.428139		21.5132	24.5656	8.92316	27.5773		0.57141	1.28261	0.222201	1.27057	0.836698	0.263797
2022/10/31 09:16:06	2022/11/19 09:18:25	33.0226	16.3374	9.25136	14.1887		3.66971	2.65588	1.73487	2.50464	2.64128	0.397715		15.2795	7.8312	13.6517	10.5821	14.2695	0.87513	0.282198	0.99699	0.59685	0.687792	0.159027		17.8918	18.5374	34.0913	12.1482		3.1754	3.60122	4.45377	2.38602	3.4041	0.43103		21.5132	24.5656	8.92316	27.5773		0.57141	1.28261	0.222201	1.27057	0.836698	0.263797
2022/10/31 09:21:06	2022/11/19 09:23:25	33.0226	16.3374	9.25136	14.1887		3.66971	2.65588	1.73487	2.50464	2.64128	0.397715		15.2795	7.8312	13.6517	10.5821	14.2695	0.87513	0.282198	0.99699	0.59685	0.687792	0.159027		17.8926	18.5374	34.0913	12.1482		3.17614	3.60122	4.45377	2.38602	3.40429	0.430998		21.5132	24.5656	8.92316	27.5862		0.57141	1.28261	0.222201	1.2795	0.83893	0.265028
2022/10/31 09:26:06	2022/11/19 09:28:25	33.0226	16.3374	9.25136	14.1887		3.66971	2.65588	1.73487	2.50464	2.64128	0.397715		15.2795	7.8312	13.6517	10.5821	14.2695	0.87513	0.282198	0.99699	0.59685	0.687792	0.159027		17.8926	18.5374	34.0913	12.1482		3.17614	3.60122	4.45377	2.38602	3.40429	0.430998		21.5132	24.5656	8.92316	27.5995		0.57141	1.28261	0.222201	1.29281	0.842258	0.266886
2022/10/31 09:31:06	2022/11/19 09:33:25	33.0226	16.3374	9.25136	14.1887		3.66971	2.65588	1.73487	2.50464	2.64128	0.397715		15.2795	7.8312	13.6517	10.5821	14.2695	0.87513	0.282198	0.99699	0.59685	0.687792	0.159027		17.8926	18.5374	34.0913	12.1482		3.17614	3.60122	4.45377	2.38602	3.40429	0.430998		21.5132	24.5656	8.92316	27.5995		0.57141	1.28261	0.222201	1.29281	0.842258	0.266886
2022/10/31 09:36:06	2022/11/19 09:38:25	33.0226	16.3374	9.25136	14.1887		3.66971	2.65588	1.73487	2.50464	2.64128	0.397715		15.2795	7.8312	13.6517	10.5821	14.2695	0.87513	0.282198	0.99699	0.59685	0.687792	0.159027		17.8926	18.5374	34.0913	12.1482		3.17614	3.60122	4.45377	2.38602	3.40429	0.430998		21.5132	24.5656	8.92316	27.5995		0.57141	1.28261	0.222201	1.29281	0.842258	0.266886
2022/10/31 09:41:06	2022/11/19 09:43:25	33.0226	16.3374	9.25136	14.1887		3.66971	2.65588	1.73487	2.50464	2.64128	0.397715		15.2888	7.8312	13.6517	10.5821	14.2588	0.8844	0.282198	0.99699	0.59685	0.69011	0.159951		17.8926	18.5374	34.0913	12.1482		3.17614	3.60122	4.45377	2.38602	3.40429	0.430998		21.5156	24.5656	8.92316	27.5995		0.57377	1.28261	0.222201	1.29281	0.842848	0.266687
2022/10/31 09:46:06	2022/11/19 09:48:25	33.0226	16.3374	9.25136	14.1887		3.66971	2.65588	1.73487	2.50464	2.64128	0.397715		15.2927	7.8312	13.6517	10.5821	14.2227	0.88831	0.282198	0.99699	0.59685	0.691087	0.16035		17.8926	18.5374	34.0913	12.1482		3.17614	3.60122	4.45377	2.38602	3.40429	0.430998		21.5293	24.5656	8.92316	27.5995		0.58752	1.28261	0.222201	1.29281	0.846285	0.26555
2022/10/31 09:51:06	2022/11/19 09:53:25	33.0226	16.3374	9.25136	14.1887		3.66971	2.65588	1.73487	2.50464	2.64128	0.397715		15.2931	7.8312	13.6517	10.5821	14.2231	0.88872	0.282198	0.99699	0.59685	0.69119	0.160392		17.8926	18.5374	34.0913	12.1482		3.17614	3.60122	4.45377	2.38602	3.40429	0.430998		21.5293	24.5656	8.92316	27.5995		0.58752	1.28261	0.222201	1.29281	0.846285	0.26555
2022/10/31 09:56:06	2022/11/19 09:58:25	33.0226	16.3374	9.25136	14.1887		3.66971	2.65588	1.73487	2.50464	2.64128	0.397715		15.2996	7.84002	13.6517	10.5821	14.2196	0.89525	0.291019	0.99699	0.59685	0.695027	0.159199		17.9081	18.5374	34.0913	12.1482		3.19166	3.60122	4.45377	2.38602	3.40817	0.43033		21.5293	24.5656	8.92316	27.5995		0.58752	1.28261	0.222201	1.29281	0.846285	0.26555
2022/10/31 10:01:06	2022/11/19 10:03:25	33.0226	16.3374	9.25136	14.1887		3.66971	2.65588	1.73487	2.50464	2.64128	0.397715		15.3015	7.87044	13.6517	10.5821	14.2215	0.89713	0.321439	0.99699	0.59685	0.703102	0.153018		17.9288	18.5389	34.0913	12.1482		3.21235	3.6028	4.45377	2.38602	3.41374	0.429551		21.5293	24.5656	8.92316	27.5995		0.58752	1.28261	0.222201	1.29281	0.846285	0.26555
2022/10/31 10:06:06	2022/11/19 10:08:25	33.0226	16.3374	9.25136	14.1887		3.66971	2.65588	1.73487	2.50464	2.64128	0.397715		15.303	7.87778	13.6517	10.5821	14.213	0.8986	0.328776	0.99699	0.59685	0.705304	0.151652		17.9422	18.5503	34.0913	12.1482		3.22573	3.61412	4.45377	2.38602	3.41991	0.429458		21.5293	24.5656	8.92316	27.5995		0.58752	1.28261	0.222201	1.29281	0.846285	0.26555
2022/10/31 10:11:06	2022/11/19 10:13:25	33.0226	16.3374	9.25136	14.1887		3.66971	2.65588	1.73487	2.50464	2.64128	0.397715		15.3067	7.9147	13.6517	10.5821	14.2167	0.90234	0.365697	0.99699	0.59685	0.715469	0.144507		17.9565	18.5745	34.0913	12.1482		3.24008	3.63835	4.45377	2.38602	3.42956	0.429871		21.5293	24.5656	8.92316	27.5995		0.58752	1.28261	0.222201	1.29281	0.846285	0.26555
2022/10/31 10:16:06	2022/11/19 10:18:25	33.0226	16.3796	9.25136	14.1887		3.66971	2.69804	1.73487	2.50464	2.65182	0.397983		15.3068	7.92745	13.6517	10.5821	14.2168	0.90244	0.378446	0.99699	0.59685	0.718682	0.141958		17.9568	18.6601	34.0913	12.1482		3.24035	3.72399	4.45377	2.38602	3.45103	0.433841		21.5293	24.5656	8.92316	27.5995		0.58752	1.28261	0.222201	1.29281	0.846285	0.26555
2022/10/31 10:21:06	2022/11/19 10:23:25	33.0226	16.5484	9.25136	14.1887		3.66971	2.8669	1.73487	2.50464	2.69403	0.401838		15.3068	7.92745	13.6517	10.5821	14.2168	0.90244	0.378446	0.99699	0.59685	0.718682	0.141958		17.9568	18.745	34.0913	12.1482		3.24035	3.80882	4.45377	2.38602	3.47224	0.438779		21.5293	24.6367	8.92316	27.5995		0.58752	1.35372	0.222201	1.29281	0.864063	0.275689
2022/10/31 10:26:06	2022/11/19 10:28:25	33.0226	16.5816	9.25136	14.1887		3.66971	2.90011	1.73487	2.50464	2.70233	0.403112		15.3068	7.92745	13.6517	10.5821	14.2168	0.90244	0.378446	0.99699	0.59685	0.718682	0.141958		17.9568	18.7659	34.0913	12.1482		3.24035	3.82976	4.45377	2.38602	3.47748	0.440147		21.5293	24.6699	8.92316	27.5995		0.58752	1.38693	0.222201	1.29281	0.872365	0.280684
2022/10/31 10:31:06	2022/11/19 10:33:25	33.0226	16.5816	9.25136	14.1887		3.66971	2.90011	1.73487	2.50464	2.70233	0.403112		15.3068	7.92745	13.6517	10.5821	14.2168	0.90244	0.378446	0.99699	0.59685	0.718682	0.141958		17.9568	18.7659	34.0913	12.1482		3.24035	3.82976	4.45377	2.38602	3.47748	0.440147		21.5293	24.6699	8.92316	27.5995		0.58752	1.38693	0.222201	1.29281	0.872365	0.280684
2022/10/31 10:36:06	2022/11/19 10:38:25	33.0232	16.5816	9.25136	14.1887		3.67035	2.90011	1.73487	2.50464	2.70249	0.40324		15.3068	7.92745	13.6517	10.5821	14.2168	0.90244	0.378446	0.99699	0.59685	0.718682	0.141958		17.9568	18.7659	34.0913	12.1482		3.24035	3.82976	4.45377	2.38602	3.47748	0.440147		21.5293	24.6699	8.92316	27.6864		0.58752	1.38693	0.222201	1.37963	0.89407	0.292127
2022/10/31 10:41:06	2022/11/19 10:43:25	33.0797	16.5816	9.25136	14.1887		3.72681	2.90011	1.73487	2.50464	2.71661	0.41462		15.3114	7.92745	13.6517	10.5821	14.2214	0.90697	0.378446	0.99699	0.59685	0.719814	0.142451		17.9568	18.7721	34.0913	12.1482		3.24035	3.83596	4.45377	2.38602	3.47903	0.440563		21.5293	24.6699	8.92316	27.8587		0.58752	1.38693	0.222201	1.55198	0.937158	0.318029
2022/10/31 10:46:06	2022/11/19 10:48:25	33.1101	16.5816	9.25136	14.1887		3.75719	2.90011	1.73487	2.50464	2.7242	0.420811		15.3295	7.92745	13.6517	10.5821	14.1795	0.92514	0.378446	0.99699	0.59685	0.724357	0.144498		17.9568	18.773	34.0913	12.1482		3.24035	3.83689	4.45377	2.38602	3.47926	0.440626		21.5293	24.6699	8.92316	27.8587		0.58752	1.38693	0.222201	1.55198	0.937158	0.318029
2022/10/31 10:51:06	2022/11/19 10:53:25	33.1101	16.5816	9.25136	14.1887		3.75719	2.90011	1.73487	2.50464	2.7242	0.420811		15.3374	7.92745	13.6517	10.5821	14.1474	0.93297	0.378446	0.99699	0.59685	0.726314	0.145415		17.9568	18.773	34.0913	12.1482		3.24035	3.83689	4.45377	2.38602	3.47926	0.440626		21.5293	24.6699	8.92316	27.8587		0.58752	1.38693	0.222201	1.55198	0.937158	0.318029
2022/10/31 10:56:06	2022/11/19 10:58:25	33.1101	16.5816	9.25136	14.1887		3.75719	2.90011	1.73487	2.50464	2.7242	0.420811		15.3374	7.92745	13.6517	10.5821	14.1474	0.93297	0.378446	0.99699	0.59685	0.726314	0.145415		17.9568	18.773	34.139	12.1482		3.24035	3.83689	4.5015	2.38602	3.49119	0.449495		21.5293	24.6699	8.92316	27.8587		0.58752	1.38693	0.222201	1.55198	0.937158	0.318029
2022/10/31 11:01:06	2022/11/19 11:03:25	33.1101	16.5816	9.25136	14.1887		3.75719	2.90011	1.73487	2.50464	2.7242	0.420811		15.3374	7.92745	13.6517	10.5821	14.1474	0.93297	0.378446	0.99699	0.59685	0.726314	0.145415		17.9568	18.773	34.3081	12.1482		3.24035	3.83689	4.6706	2.38602	3.53347	0.481982		21.5293	24.6699	8.92316	27.8587		0.58752	1.38693	0.222201	1.55198	0.937158	0.318029
2022/10/31 11:06:06	2022/11/19 11:08:25	33.1101	16.5816	9.25136	14.1887		3.75719	2.90011	1.73487	2.50464	2.7242	0.420811		15.3374	7.92745	13.6517	10.5821	14.1474	0.93297	0.378446	0.99699	0.59685	0.726314	0.145415		17.9568	18.773	34.4794	12.1482		3.24035	3.83689	4.84189	2.38602	3.57629	0.516337		21.5293	24.6699	8.92316	27.8587		0.58752	1.38693	0.222201	1.55198	0.937158	0.318029
2022/10/31 11:11:06	2022/11/19 11:13:25	33.1101	16.5816	9.25136	14.1887		3.75719	2.90011	1.73487	2.50464	2.7242	0.420811		15.3374	7.92745	13.6517	10.5821	14.1474	0.93297	0.378446	0.99699	0.59685	0.726314	0.145415		17.9568	18.773	34.5343	12.1482		3.24035	3.83689	4.89676	2.38602	3.59001	0.527604		21.5293	24.6699	8.92692	27.8587		0.58752	1.38693	0.225958	1.55198	0.938097	0.317326
2022/10/31 11:16:06	2022/11/19 11:18:25	33.1101	16.5816	9.25136	14.1887		3.75719	2.90011	1.73487	2.50464	2.7242	0.420811		15.3374	7.92745	13.6517	10.5821	14.1474	0.93297	0.378446	0.99699	0.59685	0.726314	0.145415		17.9568	18.773	34.5343	12.1482		3.24035	3.83689	4.89676	2.38602	3.59001	0.527604		21.5293	24.6699	8.9305	27.8587		0.58752	1.38693	0.229544	1.55198	0.938993	0.316656
2022/10/31 11:21:06	2022/11/19 11:23:25	33.1101	16.5816	9.25136	14.1887		3.75719	2.90011	1.73487	2.50464	2.7242	0.420811		15.3374	7.92745	13.6517	10.5821	14.1474	0.93297	0.378446	0.99699	0.59685	0.726314	0.145415		17.9568	18.773	34.5343	12.1482		3.24035	3.83689	4.89676	2.38602	3.59001	0.527604		21.5293	24.6699	8.9305	27.8587		0.58752	1.38693	0.229544	1.55198	0.938993	0.316656
2022/10/31 11:26:06	2022/11/19 11:28:25	33.1101	16.6049	9.25136	14.1887		3.75719	2.92333	1.73487	2.50464	2.73001	0.421659		15.3374	7.92745	13.6517	10.5821	14.1474	0.93297	0.378446	0.99699	0.59685	0.726314	0.145415		17.9568	18.773	34.5343	12.1482		3.24035	3.83689	4.89676	2.38602	3.59001	0.527604		21.5293	24.6699	8.9305	27.8587		0.58752	1.38693	0.229544	1.55198	0.938993	0.316656
2022/10/31 11:31:06	2022/11/19 11:33:25	33.1101	16.6501	9.25136	14.1887		3.75719	2.96858	1.73487	2.50464	2.74132	0.423536		15.3374	7.92745	13.6517	10.5821	14.1474	0.93297	0.378446	0.99699	0.59685	0.726314	0.145415		17.9568	18.773	34.5343	12.1482		3.24035	3.83689	4.89676	2.38602	3.59001	0.527604		21.5293	24.6699	8.9305	27.8587		0.58752	1.38693	0.229544	1.55198	0.938993	0.316656
2022/10/31 11:36:06	2022/11/19 11:38:25	33.1101	16.6827	9.25136	14.1887		3.75719	3.0012	1.73487	2.50464	2.74948	0.42507		15.3374	7.92745	13.6517	10.5821	14.1474	0.93297	0.378446	0.99699	0.59685	0.726314	0.145415		17.9568	18.773	34.5343	12.1482		3.24035	3.83689	4.89676	2.38602	3.59001	0.527604		21.5293	24.6699	8.9305	27.8587		0.58752	1.38693	0.229544	1.55198	0.938993	0.316656
2022/10/31 11:41:06	2022/11/19 11:43:25	33.1101	16.6827	9.25136	14.1887		3.75719	3.0012	1.73487	2.50464	2.74948	0.42507		15.3374	7.92745	13.6517	10.5821	14.1474	0.93297	0.378446	0.99699	0.59685	0.726314	0.145415		17.9568	18.773	34.5343	12.1482		3.24035	3.83689	4.89676	2.38602	3.59001	0.527604		21.5293	24.6699	8.9305	27.8587		0.58752	1.38693	0.229544	1.55198	0.938993	0.316656
2022/10/31 11:46:06	2022/11/19 11:48:25	33.1101	16.6827	9.25136	14.1887		3.75719	3.0012	1.73487	2.50464	2.74948	0.42507		15.3374	7.92745	13.6517	10.5821	14.1474	0.93297	0.378446	0.99699	0.59685	0.726314	0.145415		17.9568	18.773	34.5343	12.1482		3.24035	3.83689	4.89676	2.38602	3.59001	0.527604		21.5293	24.6699	8.9305	27.8587		0.58752	1.38693	0.229544	1.55198	0.938993	0.316656
2022/10/31 11:51:06	2022/11/19 11:53:25	33.1101	16.6827	9.25136	14.1887		3.75719	3.0012	1.73487	2.50464	2.74948	0.42507		15.3374	7.92745	13.6517	10.5821	14.1474	0.93297	0.378446	0.99699	0.59685	0.726314	0.145415		17.9568	18.773	34.5343	12.1482		3.24035	3.83689	4.89676	2.38602	3.59001	0.527604		21.5293	24.6699	8.9305	27.8587		0.58752	1.38693	0.229544	1.55198	0.938993	0.316656
2022/10/31 11:56:06	2022/11/19 11:58:25	33.1101	16.6827	9.25136	14.1887		3.75719	3.0012	1.73487	2.50464	2.74948	0.42507		15.3374	7.92745	13.6517	10.5821	14.1474	0.93297	0.378446	0.99699	0.59685	0.726314	0.145415		17.9568	18.773	34.5343	12.1482		3.24035	3.83689	4.89676	2.38602	3.59001	0.527604		21.5293	24.6699	8.9305	27.8587		0.58752	1.38693	0.229544	1.55198	0.938993	0.316656
2022/10/31 12:01:06	2022/11/19 12:03:25	33.1101	16.6827	9.25136	14.1887		3.75719	3.0012	1.73487	2.50464	2.74948	0.42507		15.3374	7.92745	13.6517	10.5821	14.1474	0.93297	0.378446	0.99699	0.59685	0.726314	0.145415		17.9568	18.773	34.5343	12.1482		3.24035	3.83689	4.89676	2.38602	3.59001	0.527604		21.5293	24.6699	8.9305	27.8587		0.58752	1.38693	0.229544	1.55198	0.938993	0.316656
2022/10/31 12:06:06	2022/11/19 12:08:25	33.1101	16.6827	9.25136	14.1887		3.75719	3.0012	1.73487	2.50464	2.74948	0.42507		15.3374	7.92745	13.6517	10.5821	14.1474	0.93297	0.378446	0.99699	0.59685	0.726314	0.145415		17.9568	18.773	34.5343	12.1482		3.24035	3.83689	4.89676	2.38602	3.59001	0.527604		21.5293	24.6699	8.9305	27.8588		0.58752	1.38693	0.229544	1.55208	0.939018	0.316672
2022/10/31 12:11:06	2022/11/19 12:13:25	33.1101	16.6827	9.25136	14.1887		3.75719	3.0012	1.73487	2.50464	2.74948	0.42507		15.3374	7.92745	13.6517	10.5821	14.1474	0.93297	0.378446	0.99699	0.59685	0.726314	0.145415		17.9568	18.773	34.5343	12.1482		3.24035	3.83689	4.89676	2.38602	3.59001	0.527604		21.5293	24.6699	8.9305	27.8758		0.58752	1.38693	0.229544	1.56905	0.943261	0.319426
2022/10/31 12:16:06	2022/11/19 12:18:25	33.1101	16.6827	9.25136	14.1887		3.75719	3.0012	1.73487	2.50464	2.74948	0.42507		15.3374	7.92745	13.6517	10.5821	14.1474	0.93297	0.378446	0.99699	0.59685	0.726314	0.145415		17.9568	18.773	34.5343	12.1482		3.24035	3.83689	4.89676	2.38602	3.59001	0.527604		21.5293	24.6699	8.9305	27.8947		0.58752	1.38693	0.229544	1.58798	0.947993	0.322537
2022/10/31 12:21:06	2022/11/19 12:23:25	33.1101	16.6827	9.25136	14.1887		3.75719	3.0012	1.73487	2.50464	2.74948	0.42507		15.3374	7.92745	13.6517	10.5821	14.1474	0.93297	0.378446	0.99699	0.59685	0.726314	0.145415		17.9568	18.773	34.5343	12.1482		3.24035	3.83689	4.89676	2.38602	3.59001	0.527604		21.5293	24.6699	8.9305	27.8951		0.58752	1.38693	0.229544	1.58836	0.948088	0.3226
2022/10/31 12:26:06	2022/11/19 12:28:25	33.2036	16.6827	9.25136	14.1887		3.8507	3.0012	1.73487	2.50464	2.77285	0.443775		15.3374	7.92745	13.6517	10.5821	14.1474	0.93297	0.378446	0.99699	0.59685	0.726314	0.145415		17.9568	18.773	34.7791	12.1482		3.24035	3.83689	5.14156	2.38602	3.65121	0.57916		21.5293	24.6699	8.9305	27.8951		0.58752	1.38693	0.229544	1.58836	0.948088	0.3226
2022/10/31 12:31:06	2022/11/19 12:33:25	33.3419	16.6827	9.25136	14.1887		3.98903	3.0012	1.73487	2.50464	2.80744	0.47221		15.3374	7.92745	13.6517	10.5821	14.1474	0.93297	0.378446	0.99699	0.59685	0.726314	0.145415		17.9568	18.773	35.2319	12.1482		3.24035	3.83689	5.59436	2.38602	3.76441	0.678758		21.5293	24.6699	8.9305	27.8951		0.58752	1.38693	0.229544	1.58836	0.948088	0.3226
2022/10/31 12:36:06	2022/11/19 12:38:25	33.3419	16.6827	9.25136	14.1887		3.98903	3.0012	1.73487	2.50464	2.80744	0.47221		15.3438	7.92745	13.6517	10.5821	14.1538	0.93936	0.378446	0.99699	0.59685	0.727912	0.146178		17.9568	18.9019	35.2686	12.1482		3.24035	3.96573	5.63109	2.38602	3.8058	0.688765		21.5293	24.6699	8.9305	27.8951		0.58752	1.38693	0.229544	1.58836	0.948088	0.3226
2022/10/31 12:41:06	2022/11/19 12:43:25	33.3419	16.7197	9.25136	14.1887		3.98903	3.03817	1.73487	2.50464	2.81668	0.473562		15.3462	7.92745	13.6517	10.5821	14.0962	0.94182	0.378446	0.99699	0.59685	0.728527	0.146476		17.9568	19.0443	35.2686	12.1482		3.24035	4.10814	5.63109	2.38602	3.8414	0.692431		21.5337	24.6699	8.9305	27.8951		0.5919	1.38693	0.229544	1.58836	0.949183	0.322193
2022/10/31 12:46:06	2022/11/19 12:48:25	33.3419	16.7795	9.25136	14.1887		3.98903	3.09799	1.73487	2.50464	2.83163	0.476123		15.3488	7.93993	13.6517	10.5821	14.0288	0.94443	0.390927	0.99699	0.59685	0.732299	0.144321		17.9604	19.0443	35.2686	12.1482		3.24399	4.10814	5.63109	2.38602	3.84231	0.692168		21.5586	24.6699	8.9305	27.8951		0.61677	1.38693	0.229544	1.58836	0.955401	0.319947
2022/10/31 12:51:06	2022/11/19 12:53:25	33.3419	16.7806	9.25136	14.1887		3.98903	3.09908	1.73487	2.50464	2.83191	0.476174		15.3685	7.96709	13.6517	10.5821	14.0485	0.9641	0.418084	0.99699	0.59685	0.744006	0.141516		17.964	19.0443	35.2686	12.1482		3.24756	4.10814	5.63109	2.38602	3.8432	0.691911		21.5842	24.6699	8.9305	27.8951		0.64237	1.38693	0.229544	1.58836	0.961801	0.317746
2022/10/31 12:56:06	2022/11/19 12:58:25	33.3419	16.7806	9.25136	14.1887		3.98903	3.09908	1.73487	2.50464	2.83191	0.476174		15.3685	7.9889	13.6517	10.5821	14.0485	0.9641	0.439898	0.99699	0.59685	0.74946	0.137374		17.964	19.0443	35.2686	12.1482		3.24756	4.10814	5.63109	2.38602	3.8432	0.691911		21.5896	24.6699	8.9305	27.8951		0.64785	1.38693	0.229544	1.58836	0.963171	0.317289
2022/10/31 13:01:06	2022/11/19 13:03:25	33.3419	16.7806	9.25136	14.1887		3.98903	3.09908	1.73487	2.50464	2.83191	0.476174		15.3685	7.99078	13.652	10.5821	14.0485	0.9641	0.441775	0.99736	0.59685	0.750021	0.137078		17.964	19.0443	35.2686	12.1482		3.24756	4.10814	5.63109	2.38602	3.8432	0.691911		21.5896	24.6699	8.9305	27.8951		0.64785	1.38693	0.229544	1.58836	0.963171	0.317289
2022/10/31 13:06:06	2022/11/19 13:08:25	33.3419	16.7806	9.25136	14.1887		3.98903	3.09908	1.73487	2.50464	2.83191	0.476174		15.3685	7.99078	13.6624	10.5821	14.0485	0.9641	0.441775	1.00773	0.59685	0.752614	0.138652		17.964	19.0443	35.2686	12.1482		3.24756	4.10814	5.63109	2.38602	3.8432	0.691911		21.5896	24.6699	8.9305	27.8951		0.64785	1.38693	0.229544	1.58836	0.963171	0.317289
2022/10/31 13:11:06	2022/11/19 13:13:25	33.3419	16.7806	9.25136	14.1887		3.98903	3.09908	1.73487	2.50464	2.83191	0.476174		15.3685	7.99078	13.6749	10.5821	14.0485	0.9641	0.441775	1.02026	0.59685	0.755746	0.140595		17.964	19.0443	35.2686	12.1482		3.24756	4.10814	5.63109	2.38602	3.8432	0.691911		21.5896	24.6699	8.9305	27.8951		0.64785	1.38693	0.229544	1.58836	0.963171	0.317289
2022/10/31 13:16:06	2022/11/19 13:18:25	33.3419	16.7806	9.25136	14.1887		3.98903	3.09908	1.73487	2.50464	2.83191	0.476174		15.3685	7.99078	13.6764	10.5821	14.0485	0.9641	0.441775	1.02169	0.59685	0.756104	0.14082		17.964	19.0443	35.2686	12.1482		3.24756	4.10814	5.63109	2.38602	3.8432	0.691911		21.5896	24.6699	8.9305	27.8951		0.64785	1.38693	0.229544	1.58836	0.963171	0.317289
2022/10/31 13:21:06	2022/11/19 13:23:25	33.3419	16.7806	9.25136	14.1887		3.98903	3.09908	1.73487	2.50464	2.83191	0.476174		15.3685	7.99078	13.6764	10.5821	14.0485	0.9641	0.441775	1.02169	0.59685	0.756104	0.14082		17.964	19.0443	35.2686	12.1482		3.24756	4.10814	5.63109	2.38602	3.8432	0.691911		21.5896	24.6699	8.9305	27.8951		0.64785	1.38693	0.229544	1.58836	0.963171	0.317289
2022/10/31 13:26:06	2022/11/19 13:28:25	33.3419	16.7815	9.25136	14.1887		3.98903	3.09996	1.73487	2.50464	2.83213	0.476215		15.3685	7.99078	13.6764	10.5821	14.0485	0.9641	0.441775	1.02169	0.59685	0.756104	0.14082		17.964	19.0443	35.2686	12.1482		3.24756	4.10814	5.63109	2.38602	3.8432	0.691911		21.5896	24.6764	8.9305	27.8951		0.64785	1.39339	0.229544	1.58836	0.964786	0.318011
2022/10/31 13:31:06	2022/11/19 13:33:25	33.3419	16.8076	9.25136	14.1887		3.98903	3.12607	1.73487	2.50464	2.83865	0.477482		15.3685	7.99078	13.6764	10.5821	14.0485	0.9641	0.441775	1.02169	0.59685	0.756104	0.14082		17.964	19.0443	35.2686	12.1482		3.24756	4.10814	5.63109	2.38602	3.8432	0.691911		21.5896	24.6855	8.9305	27.8951		0.64785	1.4025	0.229544	1.58836	0.967063	0.319041
2022/10/31 13:36:06	2022/11/19 13:38:25	33.3419	16.8079	9.25136	14.1887		3.98903	3.12641	1.73487	2.50464	2.83874	0.477499		15.3685	7.99078	13.6764	10.5821	14.0485	0.9641	0.441775	1.02169	0.59685	0.756104	0.14082		17.964	19.0443	35.2686	12.1482		3.24756	4.10814	5.63109	2.38602	3.8432	0.691911		21.5896	24.6855	8.9305	27.8951		0.64785	1.4025	0.229544	1.58836	0.967063	0.319041
2022/10/31 13:41:06	2022/11/19 13:43:25	33.3419	16.8079	9.25136	14.1887		3.98903	3.12641	1.73487	2.50464	2.83874	0.477499		15.3685	7.99078	13.6764	10.5821	14.0485	0.9641	0.441775	1.02169	0.59685	0.756104	0.14082		17.964	19.0443	35.2686	12.1482		3.24756	4.10814	5.63109	2.38602	3.8432	0.691911		21.5896	24.6855	8.9305	27.8951		0.64785	1.4025	0.229544	1.58836	0.967063	0.319041
2022/10/31 13:46:06	2022/11/19 13:48:25	33.3419	16.8079	9.25136	14.1887		3.98903	3.12641	1.73487	2.50464	2.83874	0.477499		15.3685	7.99078	13.6764	10.5821	14.0485	0.9641	0.441775	1.02169	0.59685	0.756104	0.14082		17.964	19.0443	35.2686	12.1482		3.24756	4.10814	5.63109	2.38602	3.8432	0.691911		21.5903	24.6855	8.9305	28.0731		0.64849	1.4025	0.229544	1.76642	1.01174	0.349525
2022/10/31 13:51:06	2022/11/19 13:53:25	33.3419	16.8079	9.25136	14.1887		3.98903	3.12641	1.73487	2.50464	2.83874	0.477499		15.3685	7.99078	13.6764	10.5821	14.0485	0.9641	0.441775	1.02169	0.59685	0.756104	0.14082		17.964	19.0461	35.2686	12.1482		3.24756	4.10998	5.63109	2.38602	3.84366	0.69197		21.5959	24.6855	8.9305	28.0994		0.65416	1.4025	0.229544	1.79264	1.01971	0.353782
2022/10/31 13:56:06	2022/11/19 13:58:25	33.3419	16.8079	9.25136	14.1887		3.98903	3.12641	1.73487	2.50464	2.83874	0.477499		15.3706	7.99078	13.6764	10.5821	14.0506	0.96624	0.441775	1.02169	0.59685	0.756639	0.141084		17.964	19.1987	35.2686	12.1482		3.24756	4.26253	5.63109	2.38602	3.8818	0.697888		21.597	24.6855	8.9305	28.0994		0.65527	1.4025	0.229544	1.79264	1.01999	0.353686
2022/10/31 14:01:06	2022/11/19 14:03:25	33.3419	16.8079	9.25136	14.1887		3.98903	3.12641	1.73487	2.50464	2.83874	0.477499		15.3866	7.99078	13.6764	10.5821	13.8866	0.98217	0.441775	1.02169	0.59685	0.760621	0.143098		17.964	19.3576	35.2686	12.1482		3.24756	4.4215	5.63109	2.38602	3.92154	0.706198		21.597	24.6855	8.9305	28.0994		0.65527	1.4025	0.229544	1.79264	1.01999	0.353686
2022/10/31 14:06:06	2022/11/19 14:08:25	33.3419	16.8079	9.25136	14.1887		3.98903	3.12641	1.73487	2.50464	2.83874	0.477499		15.3903	7.99078	13.6764	10.5821	13.8203	0.98589	0.441775	1.02169	0.59685	0.761551	0.14358		17.964	19.3605	35.2686	12.1482		3.24756	4.42436	5.63109	2.38602	3.92226	0.706367		21.597	24.6855	8.9305	28.0994		0.65527	1.4025	0.229544	1.79264	1.01999	0.353686
2022/10/31 14:11:06	2022/11/19 14:13:25	33.3419	16.8079	9.25136	14.1887		3.98903	3.12641	1.73487	2.50464	2.83874	0.477499		15.3903	7.99078	13.6764	10.5821	13.8203	0.98589	0.441775	1.02169	0.59685	0.761551	0.14358		17.964	19.3605	35.2686	12.1482		3.24756	4.42436	5.63109	2.38602	3.92226	0.706367		21.597	24.6855	8.9305	28.0994		0.65527	1.4025	0.229544	1.79264	1.01999	0.353686
2022/10/31 14:16:06	2022/11/19 14:18:25	33.3419	16.8079	9.25136	14.1887		3.98903	3.12641	1.73487	2.50464	2.83874	0.477499		15.3903	7.99078	13.6764	10.5821	13.8203	0.98589	0.441775	1.02169	0.59685	0.761551	0.14358		17.964	19.3605	35.2686	12.1482		3.24756	4.42436	5.63109	2.38602	3.92226	0.706367		21.597	24.6855	8.9305	28.0994		0.65527	1.4025	0.229544	1.79264	1.01999	0.353686
2022/10/31 14:21:06	2022/11/19 14:23:25	33.3419	16.8079	9.25136	14.1887		3.98903	3.12641	1.73487	2.50464	2.83874	0.477499		15.3903	7.99078	13.6764	10.5821	13.8203	0.98589	0.441775	1.02169	0.59685	0.761551	0.14358		17.964	19.3605	35.2686	12.1482		3.24756	4.42436	5.63109	2.38602	3.92226	0.706367		21.597	24.6855	8.9305	28.0994		0.65527	1.4025	0.229544	1.79264	1.01999	0.353686
2022/10/31 14:26:06	2022/11/19 14:28:25	33.3419	16.8079	9.25136	14.1887		3.98903	3.12641	1.73487	2.50464	2.83874	0.477499		15.3903	7.99078	13.6764	10.5821	13.8203	0.98589	0.441775	1.02169	0.59685	0.761551	0.14358		17.964	19.3605	35.2686	12.1517		3.24756	4.42436	5.63109	2.38949	3.92313	0.705738		21.597	24.6855	8.9305	28.0994		0.65527	1.4025	0.229544	1.79264	1.01999	0.353686
2022/10/31 14:31:06	2022/11/19 14:33:25	33.3419	16.8079	9.25136	14.1887		3.98903	3.12641	1.73487	2.50464	2.83874	0.477499		15.3903	7.99078	13.6764	10.5821	13.8203	0.98589	0.441775	1.02169	0.59685	0.761551	0.14358		17.964	19.3605	35.2686	12.1543		3.24756	4.42436	5.63109	2.39206	3.92377	0.705273		21.597	24.6855	8.9305	28.0994		0.65527	1.4025	0.229544	1.79264	1.01999	0.353686
2022/10/31 14:36:06	2022/11/19 14:38:25	33.3419	16.8079	9.25136	14.1887		3.98903	3.12641	1.73487	2.50464	2.83874	0.477499		15.3903	7.99078	13.6764	10.585	13.8203	0.98589	0.441775	1.02169	0.59976	0.762279	0.143304		17.964	19.3605	35.2686	12.1543		3.24756	4.42436	5.63109	2.39206	3.92377	0.705273		21.597	24.6855	8.9305	28.0994		0.65527	1.4025	0.229544	1.79264	1.01999	0.353686
2022/10/31 14:41:06	2022/11/19 14:43:25	33.3419	16.8079	9.25136	14.1887		3.98903	3.12641	1.73487	2.50464	2.83874	0.477499		15.3903	7.99078	13.6764	10.5904	13.8203	0.98589	0.441775	1.02169	0.6052	0.763639	0.142795		17.964	19.3605	35.2686	12.1543		3.24756	4.42436	5.63109	2.39206	3.92377	0.705273		21.597	24.6855	8.9305	28.0994		0.65527	1.4025	0.229544	1.79264	1.01999	0.353686
2022/10/31 14:46:06	2022/11/19 14:48:25	33.3419	16.8079	9.25136	14.1887		3.98903	3.12641	1.73487	2.50464	2.83874	0.477499		15.3903	7.99078	13.6764	10.5904	13.8203	0.98589	0.441775	1.02169	0.6052	0.763639	0.142795		17.964	19.3605	35.2902	12.1543		3.24756	4.42436	5.65271	2.39206	3.92917	0.709641		21.597	24.6855	8.9305	28.0994		0.65527	1.4025	0.229544	1.79264	1.01999	0.353686
2022/10/31 14:51:06	2022/11/19 14:53:25	33.3419	16.8079	9.25136	14.1887		3.98903	3.12641	1.73487	2.50464	2.83874	0.477499		15.3903	7.99078	13.6764	10.5904	13.8203	0.98589	0.441775	1.02169	0.6052	0.763639	0.142795		17.964	19.3605	35.2974	12.1543		3.24756	4.42436	5.65992	2.39206	3.93098	0.711101		21.597	24.6855	8.9305	28.0994		0.65527	1.4025	0.229544	1.79264	1.01999	0.353686
2022/10/31 14:56:06	2022/11/19 14:58:25	33.3419	16.8079	9.25136	14.1887		3.98903	3.12641	1.73487	2.50464	2.83874	0.477499		15.3903	7.99078	13.6764	10.5904	13.8203	0.98589	0.441775	1.02169	0.6052	0.763639	0.142795		17.964	19.3605	35.3796	12.1543		3.24756	4.42436	5.74205	2.39206	3.95151	0.727841		21.597	24.6855	8.9305	28.0994		0.65527	1.4025	0.229544	1.79264	1.01999	0.353686
2022/10/31 15:01:06	2022/11/19 15:03:25	33.3419	16.8079	9.25136	14.1887		3.98903	3.12641	1.73487	2.50464	2.83874	0.477499		15.3903	7.99078	13.6789	10.5904	13.8203	0.98589	0.441775	1.02423	0.6052	0.764274	0.143178		17.964	19.3605	35.3999	12.1543		3.24756	4.42436	5.76235	2.39206	3.95658	0.732009		21.597	24.6855	8.9305	28.0994		0.65527	1.4025	0.229544	1.79264	1.01999	0.353686
2022/10/31 15:06:06	2022/11/19 15:08:25	33.3419	16.8079	9.25136	14.1887		3.98903	3.12641	1.73487	2.50464	2.83874	0.477499		15.3903	7.99078	13.6941	10.5904	13.8203	0.98589	0.441775	1.03939	0.6052	0.768064	0.145503		17.964	19.3605	35.3999	12.1543		3.24756	4.42436	5.76235	2.39206	3.95658	0.732009		21.597	24.6855	8.9305	28.0994		0.65527	1.4025	0.229544	1.79264	1.01999	0.353686
2022/10/31 15:11:06	2022/11/19 15:13:25	33.3419	16.8079	9.25136	14.1887		3.98903	3.12641	1.73487	2.50464	2.83874	0.477499		15.3903	7.99078	13.6945	10.5904	13.8203	0.98589	0.441775	1.03985	0.6052	0.768179	0.145575		17.964	19.3654	35.3999	12.1543		3.24756	4.42922	5.76235	2.39206	3.9578	0.732269		21.597	24.6855	8.9305	28.0994		0.65527	1.4025	0.229544	1.79264	1.01999	0.353686
2022/10/31 15:16:06	2022/11/19 15:18:25	33.3419	16.8079	9.25136	14.1887		3.98903	3.12641	1.73487	2.50464	2.83874	0.477499		15.3903	7.99078	13.6945	10.5904	13.8203	0.98589	0.441775	1.03985	0.6052	0.768179	0.145575		17.964	19.368	35.3999	12.1543		3.24756	4.4318	5.76235	2.39206	3.95844	0.732407		21.597	24.6855	8.9305	28.0994		0.65527	1.4025	0.229544	1.79264	1.01999	0.353686
2022/10/31 15:21:06	2022/11/19 15:23:25	33.3419	16.8219	9.25136	14.1887		3.98903	3.1404	1.73487	2.50464	2.84224	0.478214		15.3903	7.99078	13.6945	10.5904	13.8203	0.98589	0.441775	1.03985	0.6052	0.768179	0.145575		17.964	19.368	35.3999	12.1543		3.24756	4.4318	5.76235	2.39206	3.95844	0.732407		21.597	24.6855	8.9305	28.0994		0.65527	1.4025	0.229544	1.79264	1.01999	0.353686
2022/10/31 15:26:06	2022/11/19 15:28:25	33.3419	16.8261	9.25136	14.1887		3.98903	3.14457	1.73487	2.50464	2.84328	0.478431		15.3903	7.99078	13.6945	10.5904	13.8203	0.98589	0.441775	1.03985	0.6052	0.768179	0.145575		17.964	19.368	35.3999	12.1543		3.24756	4.4318	5.76235	2.39206	3.95844	0.732407		21.597	24.6855	8.9305	28.0994		0.65527	1.4025	0.229544	1.79264	1.01999	0.353686
2022/10/31 15:31:06	2022/11/19 15:33:25	33.3419	16.8305	9.25136	14.1887		3.98903	3.14901	1.73487	2.50464	2.84439	0.478666		15.3903	7.99078	13.6945	10.5904	13.8203	0.98589	0.441775	1.03985	0.6052	0.768179	0.145575		17.964	19.368	35.3999	12.1543		3.24756	4.4318	5.76235	2.39206	3.95844	0.732407		21.597	24.6855	8.9305	28.0994		0.65527	1.4025	0.229544	1.79264	1.01999	0.353686
2022/10/31 15:36:06	2022/11/19 15:38:25	33.3419	16.8431	9.25136	14.1887		3.98903	3.16153	1.73487	2.50464	2.84752	0.479339		15.3903	7.99078	13.6945	10.5904	13.8203	0.98589	0.441775	1.03985	0.6052	0.768179	0.145575		17.964	19.368	35.3999	12.1543		3.24756	4.4318	5.76235	2.39206	3.95844	0.732407		21.597	24.7504	8.93344	28.0994		0.65527	1.46738	0.232486	1.79264	1.03694	0.359302
2022/10/31 15:41:06	2022/11/19 15:43:25	33.3419	16.8431	9.25136	14.1887		3.98903	3.16153	1.73487	2.50464	2.84752	0.479339		15.3903	7.99078	13.6945	10.5904	13.8203	0.98589	0.441775	1.03985	0.6052	0.768179	0.145575		17.964	19.368	35.3999	12.1543		3.24756	4.4318	5.76235	2.39206	3.95844	0.732407		21.597	24.8418	8.93505	28.0994		0.65527	1.55886	0.234093	1.79264	1.06022	0.368731
2022/10/31 15:46:06	2022/11/19 15:48:25	33.3419	16.8431	9.25136	14.1887		3.98903	3.16153	1.73487	2.50464	2.84752	0.479339		15.3903	7.99078	13.6945	10.5904	13.8203	0.98589	0.441775	1.03985	0.6052	0.768179	0.145575		17.964	19.368	35.3999	12.1543		3.24756	4.4318	5.76235	2.39206	3.95844	0.732407		21.597	24.8454	8.93505	28.0994		0.65527	1.56243	0.234093	1.79264	1.06111	0.369134
2022/10/31 15:51:06	2022/11/19 15:53:25	33.3419	16.8431	9.25136	14.1887		3.98903	3.16153	1.73487	2.50464	2.84752	0.479339		15.3903	7.99078	13.6945	10.5904	13.8203	0.98589	0.441775	1.03985	0.6052	0.768179	0.145575		17.964	19.368	35.3999	12.1543		3.24756	4.4318	5.76235	2.39206	3.95844	0.732407		21.597	24.8454	8.93505	28.0994		0.65527	1.56243	0.234093	1.79264	1.06111	0.369134
2022/10/31 15:56:06	2022/11/19 15:58:25	33.3419	16.8431	9.25136	14.1887		3.98903	3.16153	1.73487	2.50464	2.84752	0.479339		15.3925	7.99078	13.6945	10.5904	13.8125	0.98811	0.441775	1.03985	0.6052	0.768734	0.145852		17.964	19.368	35.3999	12.1543		3.24756	4.4318	5.76235	2.39206	3.95844	0.732407		21.597	24.8454	8.93505	28.0994		0.65527	1.56243	0.234093	1.79264	1.06111	0.369134
2022/10/31 16:01:06	2022/11/19 16:03:25	33.3419	16.8431	9.25136	14.1887		3.98903	3.16153	1.73487	2.50464	2.84752	0.479339		15.4085	7.99078	13.6945	10.5904	13.7585	1.00414	0.441775	1.03985	0.6052	0.772741	0.147902		17.964	19.368	35.3999	12.1543		3.24756	4.4318	5.76235	2.39206	3.95844	0.732407		21.597	24.8454	8.93505	28.0994		0.65527	1.56243	0.234093	1.79264	1.06111	0.369134
2022/10/31 16:06:06	2022/11/19 16:08:25	33.3419	16.8431	9.25136	14.1887		3.98903	3.16153	1.73487	2.50464	2.84752	0.479339		15.4167	7.99078	13.6945	10.5904	13.7167	1.01226	0.441775	1.03985	0.6052	0.774771	0.148971		17.964	19.7766	35.3999	12.1543		3.24756	4.84049	5.76235	2.39206	4.06062	0.760988		21.6005	24.8454	8.93505	28.0994		0.65868	1.56243	0.234093	1.79264	1.06196	0.368823
2022/10/31 16:11:06	2022/11/19 16:13:25	33.3419	16.8431	9.25136	14.1887		3.98903	3.16153	1.73487	2.50464	2.84752	0.479339		15.4171	7.99078	13.6945	10.5904	13.7171	1.0127	0.441775	1.03985	0.6052	0.774881	0.14903		17.964	19.779	35.3999	12.1543		3.24756	4.84282	5.76235	2.39206	4.0612	0.761187		21.6151	24.8454	8.93505	28.0994		0.67334	1.56243	0.234093	1.79264	1.06563	0.367503
2022/10/31 16:16:06	2022/11/19 16:18:25	33.3419	16.8431	9.25136	14.1887		3.98903	3.16153	1.73487	2.50464	2.84752	0.479339		15.4171	7.99078	13.6945	10.5961	13.7171	1.0127	0.441775	1.03985	0.61091	0.776309	0.148494		17.964	19.8787	35.439	12.1543		3.24756	4.94257	5.80147	2.39206	4.09592	0.777204		21.6154	24.8454	8.93761	28.0994		0.67362	1.56243	0.236655	1.79264	1.06634	0.366995
2022/10/31 16:21:06	2022/11/19 16:23:25	33.3419	16.8431	9.25136	14.2291		3.98903	3.16153	1.73487	2.54503	2.85762	0.477033		15.4171	7.99078	13.6954	10.6403	13.7171	1.0127	0.441775	1.0407	0.65504	0.787554	0.144884		17.964	19.9251	35.5228	12.1543		3.24756	4.98895	5.88524	2.39206	4.12845	0.796753		21.6154	24.8454	8.99048	28.0994		0.67362	1.56243	0.289521	1.79264	1.07955	0.357141
2022/10/31 16:26:06	2022/11/19 16:28:25	33.3419	16.8431	9.25136	14.2412		3.98903	3.16153	1.73487	2.5571	2.86063	0.476383		15.4171	7.99078	13.6996	10.6424	13.7171	1.0127	0.441775	1.04493	0.6572	0.789151	0.145338		17.9659	19.9251	35.5228	12.1543		3.24946	4.98895	5.88524	2.39206	4.12893	0.796578		21.6154	24.8454	8.99982	28.0994		0.67362	1.56243	0.298863	1.79264	1.08189	0.355422
2022/10/31 16:31:06	2022/11/19 16:33:25	33.3419	16.8431	9.25136	14.2412		3.98903	3.16153	1.73487	2.5571	2.86063	0.476383		15.4171	7.99078	13.7016	10.6424	13.7171	1.0127	0.441775	1.04694	0.6572	0.789654	0.145634		18.0424	19.9251	35.5228	12.1543		3.32596	4.98895	5.88524	2.39206	4.14805	0.789739		21.6154	24.8454	8.99982	28.0994		0.67362	1.56243	0.298863	1.79264	1.08189	0.355422
2022/10/31 16:36:06	2022/11/19 16:38:25	33.3419	16.8431	9.25136	14.2412		3.98903	3.16153	1.73487	2.5571	2.86063	0.476383		15.4171	7.99078	13.7016	10.6424	13.7171	1.0127	0.441775	1.04694	0.6572	0.789654	0.145634		18.1503	19.9251	35.5228	12.1543		3.43386	4.98895	5.88524	2.39206	4.17503	0.780789		21.6154	24.8454	8.99982	28.0994		0.67362	1.56243	0.298863	1.79264	1.08189	0.355422
2022/10/31 16:41:06	2022/11/19 16:43:25	33.3419	16.8431	9.25136	14.2412		3.98903	3.16153	1.73487	2.5571	2.86063	0.476383		15.4171	7.99078	13.7016	10.6424	13.7171	1.0127	0.441775	1.04694	0.6572	0.789654	0.145634		18.1745	19.9251	35.5228	12.1543		3.45803	4.98895	5.88524	2.39206	4.18107	0.778899		21.6154	24.8454	8.99982	28.0994		0.67362	1.56243	0.298863	1.79264	1.08189	0.355422
2022/10/31 16:46:06	2022/11/19 16:48:25	33.3419	16.8431	9.25136	14.2412		3.98903	3.16153	1.73487	2.5571	2.86063	0.476383		15.4171	7.99078	13.7016	10.6424	13.7171	1.0127	0.441775	1.04694	0.6572	0.789654	0.145634		18.1745	19.9251	35.5228	12.1543		3.45803	4.98895	5.88524	2.39206	4.18107	0.778899		21.6154	24.8644	8.99982	28.0994		0.67362	1.58144	0.298863	1.79264	1.08664	0.357589
2022/10/31 16:51:06	2022/11/19 16:53:25	33.3464	16.8431	9.25136	14.2412		3.99353	3.16153	1.73487	2.5571	2.86176	0.477271		15.4171	7.99078	13.7016	10.6424	13.7171	1.0127	0.441775	1.04694	0.6572	0.789654	0.145634		18.1745	19.9251	35.5228	12.1543		3.45803	4.98895	5.88524	2.39206	4.18107	0.778899		21.6154	24.9698	8.99982	28.0994		0.67362	1.68682	0.298863	1.79264	1.11299	0.370479
2022/10/31 16:56:06	2022/11/19 16:58:25	33.461	16.8431	9.25136	14.2412		4.10812	3.16153	1.73487	2.5571	2.89041	0.500224		15.4171	7.99078	13.7016	10.6424	13.7171	1.0127	0.441775	1.04694	0.6572	0.789654	0.145634		18.1745	19.9251	35.5228	12.1543		3.45803	4.98895	5.88524	2.39206	4.18107	0.778899		21.6154	24.9816	8.99982	28.0994		0.67362	1.69866	0.298863	1.79264	1.11595	0.372016
2022/10/31 17:01:06	2022/11/19 17:03:25	33.4832	16.8431	9.25136	14.2412		4.13027	3.16153	1.73487	2.5571	2.89594	0.504727		15.4171	7.99078	13.7016	10.6424	13.7171	1.0127	0.441775	1.04694	0.6572	0.789654	0.145634		18.1745	19.9251	35.5228	12.1543		3.45803	4.98895	5.88524	2.39206	4.18107	0.778899		21.6154	25.0533	8.99982	28.0994		0.67362	1.77033	0.298863	1.79264	1.13386	0.381677
2022/10/31 17:06:06	2022/11/19 17:08:25	33.4832	16.8431	9.25136	14.2412		4.13027	3.16153	1.73487	2.5571	2.89594	0.504727		15.4171	7.99078	13.7016	10.6424	13.7171	1.0127	0.441775	1.04694	0.6572	0.789654	0.145634		18.1745	19.9251	35.5228	12.1543		3.45803	4.98895	5.88524	2.39206	4.18107	0.778899		21.6154	25.0556	8.99982	28.0994		0.67362	1.77259	0.298863	1.79264	1.13443	0.381991
2022/10/31 17:11:06	2022/11/19 17:13:25	33.4832	16.8431	9.25136	14.2412		4.13027	3.16153	1.73487	2.5571	2.89594	0.504727		15.4171	7.99078	13.7016	10.6424	13.7171	1.0127	0.441775	1.04694	0.6572	0.789654	0.145634		18.1745	19.9251	35.5228	12.1543		3.45803	4.98895	5.88524	2.39206	4.18107	0.778899		21.6154	25.0661	8.99982	28.0994		0.67362	1.78308	0.298863	1.79264	1.13705	0.383458
2022/10/31 17:16:06	2022/11/19 17:18:25	33.4832	16.8431	9.25136	14.2412		4.13027	3.16153	1.73487	2.5571	2.89594	0.504727		15.4171	7.99078	13.7016	10.6424	13.7171	1.0127	0.441775	1.04694	0.6572	0.789654	0.145634		18.1745	19.9251	35.5228	12.1543		3.45803	4.98895	5.88524	2.39206	4.18107	0.778899		21.6154	25.1982	8.99982	28.0994		0.67362	1.91524	0.298863	1.79264	1.17009	0.402941
2022/10/31 17:21:06	2022/11/19 17:23:25	33.4832	16.8431	9.25136	14.2412		4.13027	3.16153	1.73487	2.5571	2.89594	0.504727		15.4171	7.99078	13.7016	10.6424	13.7171	1.0127	0.441775	1.04694	0.6572	0.789654	0.145634		18.1745	19.9251	35.5228	12.1543		3.45803	4.98895	5.88524	2.39206	4.18107	0.778899		21.6154	25.2151	8.99982	28.0994		0.67362	1.93211	0.298863	1.79264	1.17431	0.405554
2022/10/31 17:26:06	2022/11/19 17:28:25	33.4832	16.8432	9.25136	14.2412		4.13027	3.16166	1.73487	2.5571	2.89598	0.504733		15.4171	7.99142	13.7016	10.6424	13.7171	1.0127	0.442423	1.04694	0.6572	0.789816	0.145505		18.1745	19.9251	35.5228	12.1543		3.45803	4.98895	5.88524	2.39206	4.18107	0.778899		21.6154	25.2198	8.99982	28.0994		0.67362	1.93687	0.298863	1.79264	1.1755	0.406296
2022/10/31 17:31:06	2022/11/19 17:33:25	33.4832	16.886	9.25136	14.2412		4.13027	3.20448	1.73487	2.5571	2.90668	0.506721		15.4248	8.0201	13.7016	10.6695	13.7248	1.02044	0.471098	1.04694	0.68431	0.805697	0.138746		18.1794	19.9251	35.5228	12.1543		3.46298	4.98895	5.88524	2.39206	4.18231	0.778516		21.6154	25.353	8.99982	28.0994		0.67362	2.07006	0.298863	1.79264	1.2088	0.427886
2022/10/31 17:36:06	2022/11/19 17:38:25	33.4832	16.915	9.25136	14.2412		4.13027	3.23351	1.73487	2.5571	2.91394	0.508192		15.4578	8.02445	13.7016	10.6907	13.7578	1.0534	0.475452	1.04694	0.70547	0.820316	0.140774		18.194	19.9251	35.5228	12.1543		3.47755	4.98895	5.88524	2.39206	4.18595	0.777402		21.6167	25.3615	8.99982	28.0994		0.6749	2.07849	0.298863	1.79264	1.21122	0.42917
2022/10/31 17:41:06	2022/11/19 17:43:25	33.4832	16.9485	9.25136	14.2412		4.13027	3.26696	1.73487	2.5571	2.9223	0.510011		15.4578	8.02445	13.7017	10.6907	13.7578	1.0534	0.475452	1.04707	0.70547	0.820348	0.140791		18.194	19.9251	35.5641	12.1543		3.47755	4.98895	5.92657	2.39206	4.19628	0.784963		21.627	25.3615	8.99982	28.0994		0.68518	2.07849	0.298863	1.79264	1.21379	0.428106
2022/10/31 17:46:06	2022/11/19 17:48:25	33.4832	16.9485	9.25179	14.2412		4.13027	3.26697	1.7353	2.5571	2.92241	0.50993		15.4578	8.02445	13.732	10.6907	13.7578	1.0534	0.475452	1.07735	0.70547	0.827918	0.144995		18.194	19.9251	35.6783	12.1543		3.47755	4.98895	6.04074	2.39206	4.22483	0.806167		21.6388	25.3615	8.99982	28.0994		0.69704	2.07849	0.298863	1.79264	1.21676	0.426894
2022/10/31 17:51:06	2022/11/19 17:53:25	33.4832	16.9485	9.26006	14.2412		4.13027	3.26697	1.74357	2.5571	2.92448	0.508326		15.4578	8.02445	13.7669	10.6907	13.7578	1.0534	0.475452	1.1122	0.70547	0.836631	0.150161		18.194	19.9251	35.7064	12.1632		3.47755	4.98895	6.06891	2.40097	4.2341	0.809786		21.6431	25.3615	8.99982	28.0994		0.7013	2.07849	0.298863	1.79264	1.21782	0.426463
2022/10/31 17:56:06	2022/11/19 17:58:25	33.4832	16.9485	9.26418	14.2412		4.13027	3.26697	1.74769	2.5571	2.92551	0.507529		15.4578	8.02445	13.7676	10.6907	13.7578	1.0534	0.475452	1.11293	0.70547	0.836813	0.150273		18.194	19.9251	35.7064	12.18		3.47755	4.98895	6.06891	2.41778	4.2383	0.80662		21.6431	25.3615	8.99982	28.1135		0.7013	2.07849	0.298863	1.80681	1.22137	0.428066
2022/10/31 18:01:06	2022/11/19 18:03:25	33.5123	16.9485	9.26442	14.2412		0	0	0	0	0	0		17.1578	8.02445	13.7676	10.6909		0	0	0	0	0	0		18.2077	19.9251	35.7064	12.1869		0	0	0	0	0	0		21.6431	25.3615	8.99982	28.1469		0	0	0	0	0	0
2022/10/31 18:06:06	2022/11/19 18:08:25	33.6534	16.9485	9.26858	14.2538		0.14112	0	0.004156	0.01258	0.039464	0.0339862		17.1578	8.02445	13.7676	10.6957		0	0	0	0.0048	0.0012	0.0012		18.3079	19.9251	35.7064	12.1869		0.10025	0	0	0	0.0250625	0.0250625		21.6431	25.3615	8.99982	28.2088		0	0	0	0.06185	0.0154625	0.0154625
2022/10/31 18:11:06	2022/11/19 18:13:25	33.8056	16.96	9.26983	14.2963		0.29333	0.01154	0.00541	0.05508	0.09134	0.0682317		17.1578	8.02445	13.7676	10.7023		0	0	0	0.01138	0.002845	0.002845		18.3379	19.9251	35.7064	12.1869		0.13025	0	0	0	0.0325625	0.0325625		21.6431	25.3615	8.99982	28.2877		0	0	0	0.14082	0.035205	0.035205
2022/10/31 18:16:06	2022/11/19 18:18:25	33.9578	17.0276	9.27173	14.34		0.44553	0.07908	0.007314	0.09885	0.157694	0.0979398		17.1578	8.02445	13.7903	10.708		0	0	0.02267	0.01705	0.00993	0.00584674		18.3379	19.9251	35.7187	12.1959		0.13025	0	0.01229	0.00895	0.0378725	0.0309016		21.6431	25.3615	8.99982	28.3667		0	0	0	0.21978	0.054945	0.054945
2022/10/31 18:21:06	2022/11/19 18:23:25	34.11	17.0866	9.29278	14.3838		0.59774	0.13812	0.02836	0.14263	0.226713	0.126466		17.1578	8.02445	13.8616	10.7135		0	0	0.09399	0.02259	0.029145	0.0222611		18.3379	19.9251	35.8307	12.2194		0.13025	0	0.12431	0.03249	0.0717625	0.0327544		21.6431	25.3615	8.99982	28.4203		0	0	0	0.27337	0.0683425	0.0683425
2022/10/31 18:26:06	2022/11/19 18:28:25	34.2622	17.0912	9.30241	14.4242		0.74995	0.14267	0.037984	0.18298	0.278396	0.160127		17.1578	8.02445	13.9345	10.7306		0	0	0.16695	0.03968	0.0516575	0.0395525		18.3379	19.9295	35.9646	12.2347		0.13025	0.0044	0.2582	0.04783	0.11017	0.0558194		21.6431	25.3615	8.99982	28.4218		0	0	0	0.27492	0.06873	0.06873
2022/10/31 18:31:06	2022/11/19 18:33:25	34.3818	17.0912	9.31684	14.4322		0.8695	0.14267	0.05242	0.191	0.313898	0.187414		17.1578	8.02445	14.0013	10.7347		0	0	0.23372	0.04378	0.069375	0.0557451		18.3473	19.9535	36.0985	12.235		0.13964	0.02839	0.3921	0.04813	0.152065	0.0836008		21.6431	25.3615	9	28.4218		0	0	0.000178	0.27492	0.0687745	0.0687152
2022/10/31 18:36:06	2022/11/19 18:38:25	34.3909	17.1095	9.32635	14.4322		0.87866	0.16102	0.061929	0.191	0.323152	0.187211		17.1578	8.02445	14.0142	10.7347		0	0	0.24656	0.04378	0.072585	0.0589026		18.3801	19.9712	36.2241	12.2351		0.17242	0.04611	0.51771	0.04823	0.196118	0.111189		21.6431	25.4078	9.00823	28.4218		0	0.04637	0.008413	0.27492	0.0824257	0.0649525
2022/10/31 18:41:06	2022/11/19 18:43:25	34.4006	17.1907	9.34176	14.4322		0.88836	0.24218	0.077342	0.191	0.349721	0.18282		17.177	8.02445	14.0196	10.7457		0.01923	0	0.25199	0.05481	0.0815075	0.0579504		18.3842	19.9717	36.2712	12.2367		0.17656	0.04659	0.56476	0.04976	0.209418	0.122254		21.6431	25.6435	9.02043	28.4218		0	0.282	0.020613	0.27492	0.144383	0.077537
2022/10/31 18:46:06	2022/11/19 18:48:25	34.4166	17.2771	9.35074	14.4322		0.90432	0.32858	0.086318	0.191	0.377555	0.18246		17.2154	8.02445	14.0563	10.7923		0.05757	0	0.28873	0.10136	0.111915	0.0624855		18.418	19.9717	36.3285	12.2368		0.21034	0.04659	0.62209	0.04991	0.232233	0.135454		21.6431	25.6499	9.02426	28.4218		0	0.28847	0.02444	0.27492	0.146957	0.0779996
2022/10/31 18:51:06	2022/11/19 18:53:25	34.4232	17.3596	9.36913	14.4322		0.91098	0.41114	0.104708	0.191	0.404457	0.180745		17.2537	8.02445	14.0989	10.7961		0.09591	0	0.3313	0.10522	0.133107	0.0702135		18.4701	19.9717	36.3374	12.2368		0.26241	0.04659	0.63093	0.04991	0.24746	0.137431		21.6431	25.6499	9.03307	28.4218		0	0.28847	0.033247	0.27492	0.149159	0.0768697
2022/10/31 18:56:06	2022/11/19 18:58:25	34.4232	17.3809	9.3883	14.4322		0.91098	0.43241	0.123877	0.191	0.414567	0.178238		17.292	8.02445	14.099	10.7961		0.13424	0	0.33142	0.10522	0.14272	0.0691947		18.5205	19.9717	36.3374	12.2368		0.31283	0.04659	0.63093	0.04991	0.260065	0.138462		21.6498	25.6499	9.04265	28.4218		0.00671	0.28847	0.04283	0.27492	0.153232	0.0745847
2022/10/31 19:01:06	2022/11/19 19:03:25	34.4452	17.3809	9.40136	14.4322		0.93297	0.43241	0.136938	0.191	0.42333	0.181616		17.3255	8.02445	14.1016	10.7961		0.16776	0	0.334	0.10522	0.151745	0.0699193		18.5351	20.0524	36.3374	12.2368		0.32741	0.12734	0.63093	0.04991	0.283898	0.12961		21.667	25.6499	9.04317	28.441		0.02397	0.28847	0.043353	0.29409	0.162471	0.0744821
2022/10/31 19:06:06	2022/11/19 19:08:25	34.5784	17.3809	9.40512	14.4322		1.06615	0.43241	0.1407	0.191	0.457565	0.212616		17.3303	8.02445	14.1045	10.7961		0.17252	0	0.33689	0.10522	0.153658	0.0706439		18.559	20.1621	36.3374	12.2385		0.35129	0.23702	0.63093	0.05155	0.317698	0.121308		21.6674	25.6499	9.04317	28.4866		0.02432	0.28847	0.043353	0.3397	0.173961	0.0816663
2022/10/31 19:11:06	2022/11/19 19:13:25	34.6381	17.3809	9.40565	14.4322		1.12581	0.43241	0.141226	0.191	0.472612	0.226827		17.3303	8.0343	14.1045	10.7961		0.17252	0.009848	0.33689	0.10522	0.15612	0.0688798		18.595	20.1649	36.3374	12.2766		0.38732	0.23983	0.63093	0.08973	0.336953	0.115294		21.6674	25.6586	9.04317	28.5137		0.02432	0.29714	0.043353	0.36679	0.182901	0.0873152
2022/10/31 19:16:06	2022/11/19 19:18:25	34.7097	17.3809	9.40565	14.4322		1.19749	0.43241	0.141226	0.191	0.490532	0.24408		17.3303	8.05433	14.1045	10.7961		0.17252	0.029874	0.33689	0.10522	0.161126	0.0654315		18.5954	20.1649	36.3374	12.3299		0.38769	0.23983	0.63093	0.14295	0.35035	0.106203		21.6674	25.6797	9.04317	28.5395		0.02432	0.31821	0.043353	0.39262	0.194626	0.0941463
2022/10/31 19:21:06	2022/11/19 19:23:25	34.8117	17.3809	9.40565	14.4322		1.29948	0.43241	0.141226	0.191	0.516029	0.268779		17.3303	8.07152	14.1045	10.7961		0.17252	0.04707	0.33689	0.10522	0.165425	0.0626386		18.5954	20.1649	36.3374	12.3831		0.38769	0.23983	0.63093	0.19616	0.363653	0.0980649		21.6674	25.7038	9.04317	28.575		0.02432	0.34236	0.043353	0.42809	0.209531	0.103009
2022/10/31 19:26:06	2022/11/19 19:28:25	34.8271	17.411	9.40565	14.4495		1.3148	0.46253	0.141226	0.2083	0.531714	0.270044		17.3303	8.07372	14.1045	10.7961		0.17252	0.049267	0.33689	0.10522	0.165974	0.0622941		18.5954	20.1649	36.3374	12.4345		0.38769	0.23983	0.63093	0.24765	0.376525	0.0913514		21.6674	25.8877	9.04317	28.6014		0.02432	0.5262	0.043353	0.4545	0.262093	0.132651
2022/10/31 19:31:06	2022/11/19 19:33:25	34.8271	17.4962	9.40565	14.5118		1.3148	0.54775	0.141226	0.27063	0.568602	0.262787		17.3303	8.07372	14.1045	10.8132		0.17252	0.049267	0.33689	0.12225	0.170232	0.061043		18.5954	20.1649	36.3424	12.4493		0.38769	0.23983	0.63597	0.26242	0.381478	0.0908496		21.6674	25.8925	9.04317	28.6534		0.02432	0.53101	0.043353	0.50651	0.276298	0.140129
2022/10/31 19:36:06	2022/11/19 19:38:25	34.8357	17.5827	9.40574	14.5765		1.32349	0.63416	0.141318	0.33529	0.608565	0.258968		17.3303	8.07372	14.1045	10.8356		0.17252	0.049267	0.33689	0.14466	0.175834	0.0598199		18.5954	20.1649	36.4019	12.4493		0.38769	0.23983	0.69552	0.26242	0.396365	0.104886		21.6674	25.8925	9.04317	28.7215		0.02432	0.53101	0.043353	0.5746	0.293321	0.150128
2022/10/31 19:41:06	2022/11/19 19:43:25	34.916	17.6582	9.40833	14.6411		1.40373	0.70969	0.14391	0.39995	0.66432	0.27226		17.3303	8.07372	14.1045	10.8356		0.17252	0.049267	0.33689	0.14466	0.175834	0.0598199		18.6556	20.1649	36.4763	12.4493		0.44793	0.23983	0.7699	0.26242	0.43002	0.122509		21.6674	25.8925	9.04317	28.7896		0.02432	0.53101	0.043353	0.6427	0.310346	0.161309
2022/10/31 19:46:06	2022/11/19 19:48:25	35.0121	17.6689	9.41205	14.6998		1.49986	0.72042	0.147629	0.45859	0.706625	0.289167		17.3303	8.07372	14.1045	10.8356		0.17252	0.049267	0.33689	0.14466	0.175834	0.0598199		18.7677	20.1649	36.5383	12.4493		0.55999	0.23983	0.83185	0.26242	0.473523	0.139956		21.6674	25.8925	9.04317	28.8577		0.02432	0.53101	0.043353	0.71079	0.327368	0.173442
2022/10/31 19:51:06	2022/11/19 19:53:25	35.1082	17.7105	9.41405	14.7114		1.59599	0.76199	0.149625	0.47024	0.744461	0.310166		17.6476	8.07372	14.1045	10.8356		0.48986	0.049267	0.33689	0.14466	0.255169	0.0984742		18.805	20.1649	36.5449	12.4493		0.59732	0.23983	0.83847	0.26242	0.48451	0.143529		21.6674	25.8925	9.04317	28.9217		0.02432	0.53101	0.043353	0.77475	0.343358	0.18554
2022/10/31 19:56:06	2022/11/19 19:58:25	35.1908	17.8383	9.42646	14.7143		1.67853	0.88976	0.162043	0.47311	0.800861	0.328344		17.7913	8.07372	14.1045	10.8356		0.63354	0.049267	0.33689	0.14466	0.291089	0.12887		18.8255	20.1649	36.5449	12.4493		0.6178	0.23983	0.83847	0.26242	0.48963	0.144954		21.6674	25.8925	9.04317	28.9361		0.02432	0.53101	0.043353	0.78921	0.346973	0.188355
2022/10/31 20:01:06	2022/11/19 20:03:25	35.2148	17.9003	9.44646	14.7143		1.70259	0.95177	0.182034	0.47311	0.827376	0.332095		17.7913	8.07372	14.1045	10.8371		0.63354	0.049271	0.33689	0.14615	0.291463	0.128729		18.8255	20.1649	36.5449	12.4493		0.6178	0.23983	0.83847	0.26242	0.48963	0.144954		21.6674	25.8995	9.04317	28.9361		0.02432	0.53804	0.043353	0.78921	0.348731	0.188935
2022/10/31 20:06:06	2022/11/19 20:08:25	35.3111	17.9003	9.45343	14.7143		1.79887	0.95177	0.189011	0.47311	0.85319	0.352328		17.7913	8.07931	14.1045	10.8371		0.63354	0.05486	0.33689	0.14622	0.292878	0.12785		18.8255	20.1649	36.5449	12.4493		0.6178	0.23983	0.83847	0.26242	0.48963	0.144954		21.6674	25.9507	9.04317	28.9361		0.02432	0.58926	0.043353	0.78921	0.361536	0.193589
2022/10/31 20:11:06	2022/11/19 20:13:25	35.4599	17.9003	9.46393	14.7143		1.94764	0.95177	0.199505	0.47311	0.893006	0.384379		17.7913	8.0899	14.1045	10.8371		0.63354	0.065446	0.33689	0.14622	0.295524	0.126225		18.8277	20.1649	36.5449	12.4696		0.62001	0.23983	0.83847	0.28267	0.495245	0.142535		21.6675	25.9936	9.04317	28.9361		0.02439	0.63213	0.043353	0.78921	0.372271	0.198026
2022/10/31 20:16:06	2022/11/19 20:18:25	35.6084	17.9003	9.48109	14.7143		2.09617	0.95177	0.216671	0.47311	0.93443	0.416126		17.7913	8.1004	14.1112	10.8371		0.63354	0.075949	0.34356	0.14622	0.299817	0.124831		18.8681	20.1649	36.5449	12.5282		0.66047	0.23983	0.83847	0.34126	0.520008	0.138924		21.6753	26.0264	9.04317	28.9361		0.03224	0.66491	0.043353	0.78921	0.382428	0.200597
2022/10/31 20:21:06	2022/11/19 20:23:25	35.6744	17.9003	9.49826	14.7143		2.16213	0.95177	0.233838	0.47311	0.955212	0.429095		17.7913	8.10445	14.1216	10.8392		0.63354	0.080001	0.35399	0.1483	0.303958	0.124336		18.9166	20.1649	36.5449	12.5847		0.70896	0.23983	0.83847	0.39776	0.546255	0.137783		21.6885	26.1362	9.04317	28.9361		0.0454	0.77478	0.043353	0.78921	0.413186	0.212953
2022/10/31 20:26:06	2022/11/19 20:28:25	35.6744	17.9003	9.50732	14.7143		2.16213	0.95177	0.2429	0.47311	0.957478	0.427829		17.7913	8.11345	14.1216	10.8416		0.63354	0.088998	0.35399	0.15065	0.306794	0.122749		18.9244	20.1649	36.5449	12.6073		0.71674	0.23983	0.83847	0.4204	0.55386	0.136614		21.7016	26.2035	9.08005	28.9361		0.05856	0.84202	0.080224	0.78921	0.442503	0.215731
2022/10/31 20:31:06	2022/11/19 20:33:25	35.6744	17.9003	9.50733	14.7143		2.16213	0.95177	0.242907	0.47311	0.957479	0.427828		17.7913	8.1483	14.1216	10.8462		0.63354	0.123849	0.35399	0.15527	0.316662	0.117271		18.9244	20.1649	36.5449	12.6256		0.71674	0.23983	0.83847	0.43873	0.558443	0.135191		21.7147	26.204	9.26759	28.9361		0.07165	0.84253	0.267768	0.78921	0.492789	0.191088
2022/10/31 20:36:06	2022/11/19 20:38:25	35.6744	17.9003	9.88149	14.7201		2.16213	0.95177	0.617069	0.47896	1.05248	0.382968		17.7913	8.15221	14.1216	10.8559		0.63354	0.127752	0.35399	0.165	0.32007	0.115631		18.9244	20.1661	36.5449	12.6354		0.71674	0.24103	0.83847	0.44854	0.561195	0.134249		21.72	26.204	9.46583	28.9361		0.07692	0.84253	0.466006	0.78921	0.543666	0.176421
2022/10/31 20:41:06	2022/11/19 20:43:25	35.7229	17.9003	10.2507	14.7814		2.21062	0.95177	0.986279	0.5402	1.17222	0.360659		17.7913	8.15221	14.1216	10.8623		0.63354	0.127752	0.35399	0.17139	0.321668	0.114926		18.9244	20.1962	36.5697	12.6423		0.71674	0.27109	0.86327	0.45543	0.576633	0.132236		21.728	26.204	9.52595	28.9361		0.08494	0.84253	0.526133	0.78921	0.560703	0.173009
2022/10/31 20:46:06	2022/11/19 20:48:25	35.8892	17.9003	10.2507	14.8563		2.37699	0.95177	0.986279	0.61516	1.23255	0.390555		17.7913	8.15221	14.1458	10.8668		0.63354	0.127752	0.37817	0.17592	0.328846	0.115144		18.9244	20.2385	36.6459	12.6423		0.71674	0.31343	0.9395	0.45543	0.606275	0.138971		21.7458	26.204	9.52595	28.9361		0.1027	0.84253	0.526133	0.78921	0.565143	0.168949
2022/10/31 20:51:06	2022/11/19 20:53:25	36.0016	17.9003	10.2507	14.9264		2.48929	0.95177	0.986279	0.68522	1.27814	0.409282		17.7913	8.15221	14.1458	10.9135		0.63354	0.127752	0.37817	0.22255	0.340503	0.110478		18.9244	20.2807	36.7237	12.6423		0.71674	0.35562	1.01732	0.45543	0.636278	0.148083		21.75	26.204	9.52595	28.9361		0.10688	0.84253	0.526133	0.78921	0.566188	0.167996
2022/10/31 20:56:06	2022/11/19 20:58:25	36.0132	17.9132	10.2507	14.9417		2.50094	0.96466	0.986279	0.70049	1.28809	0.409469		17.7913	8.15221	14.3728	10.96		0.63354	0.127752	0.60518	0.26907	0.408886	0.125029		18.9244	20.3049	36.8016	12.6423		0.71674	0.37978	1.09514	0.45543	0.661773	0.161484		21.75	26.204	9.52595	28.9361		0.10688	0.84253	0.526133	0.78921	0.566188	0.167996
2022/10/31 21:01:06	2022/11/19 21:03:25	36.0258	17.955	10.2507	14.9417		2.51353	1.00649	0.986279	0.70049	1.3017	0.409942		17.7913	8.15221	14.3739	10.9665		0.63354	0.127752	0.60628	0.27555	0.410781	0.124577		18.9244	20.3487	36.8794	12.6423		0.71674	0.42355	1.17296	0.45543	0.69217	0.173197		21.75	26.207	9.52595	28.9361		0.10688	0.84559	0.526133	0.78921	0.566953	0.168417
2022/10/31 21:06:06	2022/11/19 21:08:25	36.0384	17.9979	10.2828	14.9421		2.52612	1.0494	1.0184	0.7009	1.3237	0.408467		17.7913	8.15221	14.3744	10.971		0.63354	0.127752	0.60679	0.2801	0.412046	0.124237		19.0049	20.3984	36.9572	12.6423		0.79721	0.47333	1.25078	0.45543	0.744188	0.186233		21.75	26.2173	9.52595	28.9361		0.10688	0.85584	0.526133	0.78921	0.569516	0.169843
2022/10/31 21:11:06	2022/11/19 21:13:25	36.051	18.0406	10.2873	14.9441		2.5387	1.09208	1.02283	0.70294	1.33914	0.408736		17.7913	8.15221	14.3744	10.9717		0.63354	0.127752	0.60679	0.2808	0.412221	0.124175		19.29	20.4482	37.0045	12.6423		1.08236	0.52311	1.29813	0.45543	0.839758	0.207552		21.75	26.2175	9.52595	28.9361		0.10688	0.85608	0.526133	0.78921	0.569576	0.169877
2022/10/31 21:16:06	2022/11/19 21:18:25	36.0635	18.0578	10.2873	14.9462		2.55129	1.10927	1.02283	0.70507	1.34711	0.41069		17.7913	8.15221	14.3744	10.9717		0.63354	0.127752	0.60679	0.2808	0.412221	0.124175		19.5853	20.4887	37.0051	12.8493		1.37762	0.56358	1.29864	0.66239	0.975558	0.210918		21.75	26.2175	9.52595	28.9361		0.10688	0.85608	0.526133	0.78921	0.569576	0.169877
2022/10/31 21:21:06	2022/11/19 21:23:25	36.0761	18.0578	10.2873	14.9576		2.5638	1.10927	1.02283	0.71641	1.35308	0.41228		17.8709	8.15281	14.3744	10.9717		0.71311	0.128357	0.60679	0.2808	0.432264	0.136819		19.8378	20.4924	37.0051	13.2663		1.63009	0.56733	1.29864	1.07942	1.14387	0.223031		21.75	26.2175	9.52595	28.9361		0.10688	0.85608	0.526133	0.78921	0.569576	0.169877
2022/10/31 21:26:06	2022/11/19 21:28:25	36.081	18.0638	10.2873	14.9579		2.56873	1.11534	1.02283	0.71675	1.35591	0.413146		18.1308	8.16996	14.3744	10.9717		0.97306	0.145509	0.60679	0.2808	0.50154	0.184593		19.8692	20.4924	37.0051	13.2663		1.66156	0.56733	1.29864	1.07942	1.15174	0.228812		21.75	26.2175	9.52595	28.9361		0.10688	0.85608	0.526133	0.78921	0.569576	0.169877
2022/10/31 21:31:06	2022/11/19 21:33:25	36.1508	18.0751	10.2873	14.9701		2.63857	1.12658	1.02283	0.72896	1.37923	0.42814		18.1363	8.19457	14.3744	10.9717		0.97847	0.170113	0.60679	0.2808	0.509043	0.181862		19.8692	20.4924	37.0051	13.2695		1.66156	0.56733	1.29864	1.08262	1.15254	0.228729		21.75	26.247	9.52595	28.9361		0.10688	0.8855	0.526133	0.78921	0.576931	0.174118
2022/10/31 21:36:06	2022/11/19 21:38:25	36.5769	18.0751	10.2873	15.0085		3.06464	1.12659	1.02283	0.76735	1.49535	0.528513		18.1363	8.20834	14.3744	10.9717		0.97847	0.183886	0.60679	0.2808	0.512487	0.179743		19.8736	20.4924	37.0051	13.2739		1.6659	0.56733	1.29864	1.08698	1.15471	0.229426		21.75	26.2752	9.52595	28.9361		0.10688	0.91376	0.526133	0.78921	0.583996	0.178383
2022/10/31 21:41:06	2022/11/19 21:43:25	36.8987	18.0751	10.2873	15.0118		3.38646	1.12659	1.02283	0.77061	1.57662	0.607891		18.1518	8.20839	14.3744	10.9717		0.99406	0.183933	0.60679	0.2808	0.516396	0.183115		19.8911	20.4924	37.0051	13.2739		1.68343	0.56733	1.29864	1.08698	1.1591	0.232699		21.75	26.2836	9.52595	28.9361		0.10688	0.92216	0.526133	0.78921	0.586096	0.179684
2022/10/31 21:46:06	2022/11/19 21:48:25	36.9078	18.0751	10.2873	15.0295		3.39551	1.12659	1.02283	0.78835	1.58332	0.608191		18.1573	8.20839	14.3744	10.9747		0.99954	0.183933	0.60679	0.28377	0.518508	0.18399		19.8911	20.4924	37.0051	13.2837		1.68343	0.56733	1.29864	1.09677	1.16154	0.232459		21.7513	26.2932	9.52595	28.9361		0.10822	0.93174	0.526133	0.78921	0.588826	0.18089
2022/10/31 21:51:06	2022/11/19 21:53:25	36.9078	18.0751	10.2873	15.0528		3.39551	1.12659	1.02283	0.81165	1.58914	0.605676		18.1573	8.20839	14.3744	10.9842		0.99954	0.183933	0.60679	0.29326	0.520881	0.182994		19.8911	20.4924	37.0051	13.2857		1.68343	0.56733	1.29864	1.09883	1.16206	0.232412		21.7586	26.3496	9.52595	28.9361		0.11552	0.98813	0.526133	0.78921	0.604748	0.188532
2022/10/31 21:56:06	2022/11/19 21:58:25	36.9078	18.0751	10.2875	15.062		3.39551	1.12659	1.02307	0.82084	1.5915	0.604678		18.1573	8.20839	14.3744	10.9939		0.99954	0.183933	0.60679	0.30299	0.523313	0.181999		19.8911	20.4924	37.0053	13.2907		1.68343	0.56733	1.29883	1.10384	1.16336	0.232311		21.7666	26.4045	9.52595	28.9361		0.12353	1.04305	0.526133	0.78921	0.620481	0.196404
2022/10/31 22:01:06	2022/11/19 22:03:25	36.9078	18.0751	10.2898	15.2767		3.39551	1.12659	1.02534	1.03557	1.64575	0.583696		18.1573	8.20839	14.3744	11.0026		0.99954	0.183933	0.60679	0.31168	0.525486	0.181133		19.8911	20.5052	37.0683	13.3083		1.68343	0.58006	1.3619	1.12142	1.1867	0.232685		21.7746	26.4105	9.52595	28.9653		0.13154	1.049	0.526133	0.81835	0.631256	0.197965
2022/10/31 22:06:06	2022/11/19 22:08:25	36.9078	18.0751	10.2898	15.2767		3.39551	1.12659	1.02534	1.03557	1.64575	0.583696		18.1573	8.20839	14.3744	11.0052		0.99954	0.183933	0.60679	0.31428	0.526136	0.180878		19.8911	20.5559	37.1816	13.3127		1.68343	0.63075	1.4752	1.12583	1.2288	0.230157		21.7794	26.4714	9.52595	29.0253		0.13629	1.10991	0.526133	0.87843	0.662691	0.212582
2022/10/31 22:11:06	2022/11/19 22:13:25	36.9243	18.0751	10.2898	15.4775		3.41201	1.12659	1.02534	1.23635	1.70007	0.57227		18.1573	8.20839	14.3744	11.0056		0.99954	0.183933	0.60679	0.31471	0.526243	0.180836		19.8911	20.6091	37.2949	13.3287		1.68343	0.68396	1.58849	1.14178	1.27442	0.229522		21.7794	26.4889	9.52595	29.0743		0.13633	1.12742	0.526133	0.92737	0.679313	0.219967
2022/10/31 22:16:06	2022/11/19 22:18:25	37.0864	18.0751	10.2898	15.4775		3.57409	1.12659	1.02534	1.23636	1.74059	0.612682		18.1573	8.20839	14.3744	11.0056		0.99954	0.183933	0.60679	0.31471	0.526243	0.180836		19.8911	20.6623	37.4082	13.3314		1.68343	0.73718	1.70179	1.14449	1.31672	0.23243		21.7794	26.4889	9.52595	29.1492		0.13633	1.12742	0.526133	1.00226	0.698036	0.227667
2022/10/31 22:21:06	2022/11/19 22:23:25	37.1166	18.0798	10.2966	15.4797		3.60433	1.13125	1.03219	1.23851	1.75157	0.619022		18.1573	8.20839	14.3744	11.0056		0.99954	0.183933	0.60679	0.31471	0.526243	0.180836		19.8911	20.7155	37.5215	13.3314		1.68343	0.79039	1.81509	1.14449	1.35835	0.238503		21.7794	26.4889	9.52595	29.1593		0.13633	1.12742	0.526133	1.0124	0.700571	0.228807
2022/10/31 22:26:06	2022/11/19 22:28:25	37.1625	18.119	10.3181	15.4814		3.65023	1.17054	1.05372	1.24026	1.77869	0.625033		18.1573	8.20839	14.3744	11.0056		0.99954	0.183933	0.60679	0.31471	0.526243	0.180836		19.8911	20.7427	37.6348	13.3314		1.68343	0.81762	1.92838	1.14449	1.39348	0.252289		21.7794	26.4889	9.52595	29.1593		0.13633	1.12742	0.526133	1.0124	0.700571	0.228807
2022/10/31 22:31:06	2022/11/19 22:33:25	37.2094	18.1654	10.3392	15.4844		3.69715	1.21689	1.07479	1.24322	1.80801	0.630798		18.1573	8.20839	14.3744	11.0056		0.99954	0.183933	0.60679	0.31471	0.526243	0.180836		19.8911	20.7451	37.7481	13.3314		1.68343	0.82002	2.04168	1.14449	1.42241	0.272602		21.7794	26.4889	9.52595	29.1593		0.13633	1.12742	0.526133	1.0124	0.700571	0.228807
2022/10/31 22:36:06	2022/11/19 22:38:25	37.2547	18.2102	10.3498	15.4844		3.74243	1.26173	1.08534	1.24322	1.83318	0.637646		18.1573	8.20839	14.3744	11.0056		0.99954	0.183933	0.60679	0.31471	0.526243	0.180836		19.8911	20.748	37.8306	13.3314		1.68343	0.8229	2.12416	1.14449	1.44375	0.288013		21.7794	26.4889	9.52595	29.1593		0.13633	1.12742	0.526133	1.0124	0.700571	0.228807
2022/10/31 22:41:06	2022/11/19 22:43:25	37.2674	18.2231	10.3628	15.4844		3.7551	1.27459	1.09837	1.24322	1.84282	0.638581		18.1573	8.20839	14.3744	11.0056		0.99954	0.183933	0.60679	0.31471	0.526243	0.180836		19.9214	20.7743	37.8895	13.3314		1.71374	0.84923	2.18312	1.14449	1.47265	0.297102		21.7794	26.5449	9.52595	29.1593		0.13633	1.18339	0.526133	1.0124	0.714563	0.237761
2022/10/31 22:46:06	2022/11/19 22:48:25	37.2674	18.2231	10.3628	15.4844		3.7551	1.27459	1.09837	1.24322	1.84282	0.638581		18.1573	8.21698	14.3744	11.0056		0.99954	0.192527	0.60679	0.31471	0.528392	0.179488		19.9283	20.7848	37.8895	13.3314		1.72062	0.85971	2.18312	1.14449	1.47699	0.295743		21.7794	26.6376	9.52595	29.1593		0.13633	1.27617	0.526133	1.0124	0.737758	0.25361
2022/10/31 22:51:06	2022/11/19 22:53:25	37.2674	18.2231	10.3628	15.4844		3.7551	1.27459	1.09837	1.24322	1.84282	0.638581		18.1573	8.23832	14.3744	11.0056		0.99954	0.213866	0.60679	0.31471	0.533727	0.17621		19.9283	20.789	37.8895	13.3315		1.72062	0.86387	2.18312	1.14459	1.47805	0.295011		21.7794	26.759	9.52595	29.1593		0.13633	1.39754	0.526133	1.0124	0.768101	0.275916
2022/10/31 22:56:06	2022/11/19 22:58:25	37.2674	18.2231	10.3628	15.4844		3.7551	1.27459	1.09837	1.24322	1.84282	0.638581		18.1573	8.25978	14.3744	11.0056		0.99954	0.235324	0.60679	0.31471	0.539091	0.173017		19.9283	20.8395	37.8895	13.3393		1.72062	0.91444	2.18312	1.1524	1.49265	0.285601		21.7794	26.8799	9.52595	29.1593		0.13633	1.51846	0.526133	1.0124	0.798331	0.299548
2022/10/31 23:01:06	2022/11/19 23:03:25	37.2674	18.2231	10.3628	15.4844		3.7551	1.27459	1.09837	1.24322	1.84282	0.638581		18.1573	8.28124	14.3744	11.0056		0.99954	0.256782	0.60679	0.31471	0.544456	0.169933		19.9283	20.8907	37.8895	13.3519		1.72062	0.96555	2.18312	1.16498	1.50857	0.275818		21.7794	26.9266	9.52595	29.1593		0.13633	1.56512	0.526133	1.0124	0.809996	0.308975
2022/10/31 23:06:06	2022/11/19 23:08:25	37.2674	18.2231	10.3628	15.4844		3.7551	1.27459	1.09837	1.24322	1.84282	0.638581		18.1573	8.29563	14.3744	11.0056		0.99954	0.271172	0.60679	0.31471	0.548053	0.167929		19.9283	20.8951	37.8895	13.3645		1.72062	0.97002	2.18312	1.17757	1.51283	0.273786		21.7794	26.966	9.52595	29.1593		0.13633	1.60453	0.526133	1.0124	0.819848	0.317053
2022/10/31 23:11:06	2022/11/19 23:13:25	37.2674	18.2231	10.3628	15.4844		3.7551	1.27459	1.09837	1.24322	1.84282	0.638581		18.1573	8.29601	14.3744	11.0082		0.99954	0.271552	0.60679	0.31729	0.548793	0.167579		19.9283	20.8951	37.8895	13.3771		1.72062	0.97002	2.18312	1.19016	1.51598	0.272517		21.7794	27.1152	9.52595	29.1593		0.13633	1.7537	0.526133	1.0124	0.857141	0.348456
2022/10/31 23:16:06	2022/11/19 23:18:25	37.2674	18.2239	10.3628	15.4844		3.7551	1.27539	1.09837	1.24322	1.84302	0.638522		18.1573	8.29601	14.3744	11.0127		0.99954	0.271552	0.60679	0.32181	0.549923	0.167062		19.9283	20.8951	37.8895	13.3859		1.72062	0.97002	2.18312	1.19905	1.5182	0.271639		21.7794	27.2708	9.52595	29.1593		0.13633	1.90934	0.526133	1.0124	0.896051	0.382351
2022/10/31 23:21:06	2022/11/19 23:23:25	37.2674	18.2761	10.3628	15.4844		3.7551	1.32756	1.09841	1.24322	1.85607	0.634775		18.1573	8.29601	14.3744	11.0216		0.99954	0.271552	0.60679	0.33068	0.552141	0.166064		19.9517	20.8951	37.8895	13.4		1.74406	0.97002	2.18312	1.21312	1.52758	0.271777		21.7794	27.365	9.52595	29.1593		0.13633	2.00357	0.526133	1.0124	0.919608	0.403312
2022/10/31 23:26:06	2022/11/19 23:28:25	37.2674	18.347	10.366	15.5026		3.7551	1.3985	1.10163	1.26145	1.87917	0.628245		18.1573	8.29601	14.3744	11.0271		0.99954	0.271552	0.60679	0.33621	0.553523	0.165454		20.0435	20.8951	37.8895	13.4009		1.83582	0.97002	2.18312	1.21397	1.55073	0.278661		21.7794	27.366	9.52595	29.1593		0.13633	2.00454	0.526133	1.0124	0.919851	0.40353
2022/10/31 23:31:06	2022/11/19 23:33:25	37.2674	18.3619	10.366	15.5585		3.7551	1.41337	1.10163	1.31737	1.89687	0.622831		18.1573	8.29601	14.3744	11.0272		0.99954	0.271552	0.60679	0.33628	0.553541	0.165447		20.1395	20.8955	37.8895	13.4009		1.93182	0.97043	2.18312	1.21397	1.57484	0.28766		21.7794	27.366	9.52595	29.1593		0.13633	2.00454	0.526133	1.0124	0.919851	0.40353
2022/10/31 23:36:06	2022/11/19 23:38:25	37.2674	18.3701	10.3713	15.5834		3.7551	1.42165	1.10693	1.34221	1.90647	0.619821		18.1573	8.29601	14.3744	11.0272		0.99954	0.271552	0.60679	0.33628	0.553541	0.165447		20.1892	20.9537	37.8895	13.4009		1.98156	1.02858	2.18312	1.21397	1.60181	0.283011		21.7794	27.3878	9.52595	29.1593		0.13636	2.02631	0.526133	1.0124	0.925301	0.408409
2022/10/31 23:41:06	2022/11/19 23:43:25	37.2674	18.3858	10.3848	15.5834		3.7551	1.43733	1.12034	1.34221	1.91374	0.617367		18.1573	8.29601	14.3744	11.0272		0.99954	0.271552	0.60679	0.33628	0.553541	0.165447		20.2631	21.0527	38.3007	13.4009		2.05547	1.12758	2.59431	1.21397	1.74783	0.351294		21.7875	27.4258	9.52608	29.1593		0.14441	2.06435	0.526254	1.0124	0.936853	0.415684
2022/10/31 23:46:06	2022/11/19 23:48:25	37.2674	18.4013	10.3894	15.5834		3.7551	1.45281	1.12498	1.34221	1.91877	0.615884		18.1573	8.29601	14.3744	11.0272		0.99954	0.271552	0.60679	0.33628	0.553541	0.165447		20.2989	21.1327	38.78	13.4009		2.09123	1.20764	3.07359	1.21397	1.89661	0.443831		21.8018	27.5935	9.52746	29.1593		0.15872	2.23199	0.527635	1.0124	0.982686	0.45163
2022/10/31 23:51:06	2022/11/19 23:53:25	37.2674	18.4162	10.3903	15.5834		3.7551	1.46766	1.12586	1.34221	1.92271	0.614863		18.1573	8.29601	14.3744	11.0272		0.99954	0.271552	0.60679	0.33628	0.553541	0.165447		20.2989	21.1468	38.7871	13.4009		2.09123	1.22165	3.08067	1.21397	1.90188	0.443596		21.8161	27.6019	9.52872	29.1593		0.17302	2.24041	0.528901	1.0124	0.988683	0.451303
2022/10/31 23:56:06	2022/11/19 23:58:25	37.2674	18.4162	10.3961	15.5834		3.7551	1.46766	1.13171	1.34221	1.92417	0.614232		18.1573	8.29601	14.3744	11.0272		0.99954	0.271552	0.60679	0.33628	0.553541	0.165447		20.2989	21.1611	38.8994	13.4165		2.09123	1.23595	3.19299	1.22959	1.93744	0.464865		21.8304	27.6019	9.52918	29.1593		0.18733	2.24041	0.529355	1.0124	0.992374	0.449117
2022/11/01 00:01:06	2022/11/20 00:03:25	37.2674	18.4162	10.4105	15.5834		3.7551	1.46766	1.14605	1.34221	1.92775	0.612699		18.1573	8.29609	14.3744	11.0272		0.99954	0.271635	0.60679	0.33628	0.553561	0.165435		20.2989	21.1751	39.0038	13.4519		2.09123	1.25004	3.29742	1.265	1.97592	0.482353		21.8446	27.6019	9.5405	29.1593		0.20153	2.24041	0.54068	1.0124	0.998755	0.446028
2022/11/01 00:06:06	2022/11/20 00:08:25	37.2674	18.4162	10.4348	15.5834		3.7551	1.46766	1.17037	1.34221	1.93383	0.610138		18.1573	8.30846	14.3744	11.0272		0.99954	0.284008	0.60679	0.33628	0.556655	0.163697		20.2989	21.1945	39.0079	13.4874		2.09123	1.26939	3.30149	1.30047	1.99065	0.476531		21.8501	27.6019	9.55681	29.1593		0.20705	2.24041	0.556987	1.0124	1.00421	0.443821
2022/11/01 00:11:06	2022/11/20 00:13:25	37.2674	18.4162	10.4568	15.5834		3.7551	1.46766	1.19239	1.34221	1.93934	0.607863		18.1573	8.32963	14.3744	11.0272		0.99954	0.30518	0.60679	0.33628	0.561948	0.160819		20.2989	21.4741	39.0079	13.5223		2.09123	1.549	3.30149	1.33541	2.06928	0.440462		21.8501	27.6019	9.56965	29.1593		0.20705	2.24041	0.569833	1.0124	1.00742	0.442753
2022/11/01 00:16:06	2022/11/20 00:18:25	37.2676	18.4162	10.4621	15.5834		3.75531	1.46766	1.19764	1.34221	1.9407	0.607379		18.1573	8.35022	14.3744	11.0272		0.99954	0.325766	0.6068	0.33628	0.567097	0.15814		20.2989	21.5216	39.0079	13.5373		2.09123	1.5965	3.30149	1.35041	2.08491	0.433795		21.8535	27.6019	9.57064	29.1593		0.21046	2.24041	0.570822	1.0124	1.00852	0.442158
2022/11/01 00:21:06	2022/11/20 00:23:25	37.3101	18.4162	10.5039	15.5834		3.79787	1.46766	1.23952	1.34221	1.96181	0.613793		18.1611	8.36097	14.3832	11.0272		1.00333	0.336518	0.61557	0.33628	0.572925	0.157839		20.2989	21.5216	39.0079	13.5454		2.09123	1.5965	3.30149	1.35846	2.08692	0.432663		21.8775	27.6019	9.57064	29.1593		0.23447	2.24041	0.570822	1.0124	1.01453	0.438573
2022/11/01 00:26:06	2022/11/20 00:28:25	37.3845	18.4162	10.5308	15.5834		3.87226	1.46766	1.26635	1.34221	1.98712	0.629749		18.1935	8.3793	14.3946	11.0272		1.03576	0.354846	0.62698	0.33628	0.588467	0.163231		20.2989	21.5216	39.0079	13.5454		2.09123	1.5965	3.30149	1.35846	2.08692	0.432663		21.905	27.6019	9.57064	29.1593		0.26193	2.24041	0.570822	1.0124	1.02139	0.434538
2022/11/01 00:31:06	2022/11/20 00:33:25	37.4427	18.4162	10.5308	15.5834		3.93047	1.46766	1.26635	1.34221	2.00167	0.644271		18.2173	8.38218	14.395	11.0272		1.05954	0.357728	0.62739	0.33628	0.595235	0.168345		20.2989	21.5216	39.0173	13.5454		2.09123	1.5965	3.31089	1.35846	2.08927	0.434863		21.9325	27.6019	9.57064	29.1603		0.2894	2.24041	0.570822	1.01336	1.0285	0.430571
2022/11/01 00:36:06	2022/11/20 00:38:25	37.5686	18.4162	10.5308	15.5834		4.05632	1.46766	1.26635	1.34221	2.03313	0.675671		18.2176	8.38218	14.395	11.0272		1.05985	0.357728	0.62739	0.33628	0.595312	0.168416		20.2989	21.5216	39.0262	13.5454		2.09123	1.5965	3.3198	1.35846	2.0915	0.436949		21.9599	27.6019	9.57064	29.165		0.31686	2.24041	0.570822	1.01811	1.03655	0.426661
2022/11/01 00:41:06	2022/11/20 00:43:25	37.7368	18.4162	10.5308	15.5834		4.22455	1.46766	1.26635	1.34221	2.07519	0.717654		18.2176	8.38218	14.395	11.0272		1.05985	0.357728	0.62739	0.33628	0.595312	0.168416		20.2989	21.5216	39.0262	13.5454		2.09123	1.5965	3.3198	1.35846	2.0915	0.436949		21.9851	27.6019	9.57064	29.1702		0.34204	2.24041	0.570822	1.02326	1.04413	0.42313
2022/11/01 00:46:06	2022/11/20 00:48:25	37.8366	18.4162	10.5308	15.5834		4.32437	1.46766	1.26635	1.34221	2.10015	0.742568		18.2176	8.38218	14.395	11.0272		1.05985	0.357728	0.62739	0.33628	0.595312	0.168416		20.2989	21.5216	39.0262	13.5454		2.09123	1.5965	3.3198	1.35846	2.0915	0.436949		21.9899	27.6019	9.57064	29.174		0.34685	2.24041	0.570822	1.02708	1.04629	0.422451
2022/11/01 00:51:06	2022/11/20 00:53:25	37.9293	18.4162	10.5308	15.5834		4.41699	1.46766	1.26635	1.34221	2.1233	0.765688		18.2176	8.38218	14.395	11.0272		1.05985	0.357728	0.62739	0.33628	0.595312	0.168416		20.2989	21.5216	39.0262	13.5454		2.09123	1.5965	3.3198	1.35846	2.0915	0.436949		21.9899	27.6019	9.57064	29.1742		0.34685	2.24041	0.570822	1.02729	1.04634	0.42245
2022/11/01 00:56:06	2022/11/20 00:58:25	37.9356	18.4175	10.5308	15.5834		4.42336	1.46904	1.26635	1.34221	2.12524	0.76718		18.2176	8.38218	14.395	11.0276		1.05985	0.357728	0.62739	0.3367	0.595417	0.168362		20.2989	21.5216	39.0262	13.5454		2.09123	1.5965	3.3198	1.35846	2.0915	0.436949		21.9899	27.64	9.57185	29.1742		0.34685	2.27852	0.572027	1.02729	1.05617	0.431326
2022/11/01 01:01:06	2022/11/20 01:03:25	37.9429	18.4684	10.5406	15.5869		4.43063	1.5199	1.27614	1.34573	2.1431	0.764231		18.2176	8.38218	14.395	11.0392		1.05985	0.357728	0.62739	0.34831	0.59832	0.166894		20.2989	21.5216	39.0262	13.546		2.09123	1.5965	3.3198	1.35911	2.09166	0.436858		21.9899	27.7551	9.58856	29.1742		0.34685	2.39364	0.588739	1.02729	1.08913	0.457069
2022/11/01 01:06:06	2022/11/20 01:08:25	37.9529	18.5155	10.5719	15.5887		4.44066	1.56696	1.30744	1.34751	2.16564	0.760481		18.2176	8.38218	14.395	11.0558		1.05985	0.357728	0.62739	0.36491	0.60247	0.164861		20.2991	21.5304	39.0262	13.5752		2.09138	1.60531	3.3198	1.38825	2.10119	0.431981		21.9899	27.7717	9.61002	29.1742		0.34685	2.41024	0.610197	1.02729	1.09864	0.459089
2022/11/01 01:11:06	2022/11/20 01:13:25	37.9529	18.5313	10.5831	15.5887		4.44066	1.58276	1.31869	1.34751	2.1724	0.758394		18.2176	8.386	14.395	11.0675		1.05985	0.361546	0.62739	0.37656	0.606337	0.163002		20.3099	21.5644	39.0262	13.6195		2.10221	1.63925	3.3198	1.43259	2.12346	0.422635		21.9899	27.8069	9.62797	29.1742		0.34685	2.44546	0.628149	1.02729	1.11194	0.465909
2022/11/01 01:16:06	2022/11/20 01:18:25	37.9529	18.5755	10.6095	15.5887		4.44066	1.62705	1.34508	1.34751	2.19007	0.753108		18.2176	8.42657	14.395	11.0679		1.05985	0.402117	0.62739	0.37699	0.616587	0.158115		20.3313	21.5998	39.0262	13.6631		2.12367	1.67472	3.3198	1.47615	2.14859	0.413227		21.9899	27.9111	9.62994	29.1742		0.34685	2.54967	0.630117	1.02729	1.13848	0.490657
2022/11/01 01:21:06	2022/11/20 01:23:25	37.9529	18.5846	10.6408	15.5887		4.44066	1.6361	1.37642	1.34752	2.20017	0.749641		18.2176	8.47635	14.395	11.0679		1.05985	0.451899	0.62739	0.37699	0.629032	0.152891		20.3946	21.6353	39.0262	13.6777		2.18692	1.7102	3.3198	1.49076	2.17692	0.407729		21.9899	27.9143	9.62994	29.1742		0.34685	2.55281	0.630117	1.02729	1.13927	0.49141
2022/11/01 01:26:06	2022/11/20 01:28:25	37.9529	18.6076	10.6544	15.5982		4.44066	1.6591	1.38994	1.357	2.21167	0.746069		18.2176	8.51722	14.395	11.0679		1.05985	0.492769	0.62739	0.37699	0.63925	0.149243		20.4631	21.6708	39.0262	13.6777		2.25545	1.74568	3.3198	1.49076	2.20292	0.404807		21.9899	27.9143	9.62994	29.1742		0.34685	2.55281	0.630117	1.02729	1.13927	0.49141
2022/11/01 01:31:06	2022/11/20 01:33:25	37.9529	18.6076	10.673	15.6069		4.44066	1.6591	1.40862	1.36576	2.21853	0.743527		18.2176	8.52601	14.395	11.0679		1.05985	0.501559	0.62739	0.37699	0.641447	0.148539		20.4774	21.7061	39.0262	13.6777		2.26971	1.78098	3.3198	1.49076	2.21531	0.401712		21.9899	27.9143	9.62994	29.1742		0.34685	2.55281	0.630117	1.02729	1.13927	0.49141
2022/11/01 01:36:06	2022/11/20 01:38:25	37.9529	18.6076	10.7008	15.6069		4.44066	1.6591	1.43642	1.36576	2.22548	0.741032		18.2176	8.53128	14.4259	11.0737		1.05985	0.506825	0.65834	0.38282	0.651959	0.147172		20.4774	21.7225	39.0262	13.6777		2.26971	1.79736	3.3198	1.49076	2.21941	0.400255		21.9899	27.9143	9.62994	29.1742		0.34685	2.55281	0.630117	1.02729	1.13927	0.49141
2022/11/01 01:41:06	2022/11/20 01:43:25	37.9529	18.6076	10.7101	15.6069		4.44066	1.6591	1.44568	1.36576	2.2278	0.740214		18.2176	8.54221	14.4592	11.0802		1.05985	0.517755	0.69161	0.38929	0.664626	0.145577		20.4774	22.1655	39.0262	13.6777		2.26971	2.2404	3.3198	1.49076	2.33017	0.375909		21.9899	27.9143	9.62994	29.1742		0.34685	2.55284	0.630117	1.02729	1.13927	0.491417
2022/11/01 01:46:06	2022/11/20 01:48:25	37.9529	18.6076	10.7101	15.6082		4.44066	1.6591	1.44568	1.36701	2.22811	0.740092		18.2176	8.54221	14.4592	11.0905		1.05985	0.517755	0.69162	0.39961	0.667209	0.143964		20.4774	22.191	39.0262	13.6777		2.26971	2.26587	3.3198	1.49076	2.33654	0.375456		21.9899	27.9342	9.62994	29.1742		0.34685	2.57271	0.630117	1.02729	1.14424	0.496182
2022/11/01 01:51:06	2022/11/20 01:53:25	37.9529	18.6076	10.7101	15.6117		4.44066	1.6591	1.44568	1.37052	2.22899	0.739753		18.2176	8.54221	14.4669	11.1014		1.05985	0.517755	0.69929	0.41048	0.671844	0.142407		20.4774	22.191	39.0262	13.6777		2.26971	2.26587	3.3198	1.49076	2.33654	0.375456		21.9899	27.9633	9.62994	29.1742		0.34685	2.60185	0.630117	1.02729	1.15153	0.503177
2022/11/01 01:56:06	2022/11/20 01:58:25	37.9529	18.6076	10.7103	15.6117		4.44066	1.6591	1.44586	1.37052	2.22903	0.739737		18.2283	8.54221	14.4829	11.1081		1.07056	0.517755	0.71534	0.41719	0.680211	0.1441		20.4774	22.191	39.0262	13.6777		2.26971	2.26587	3.3198	1.49076	2.33654	0.375456		21.9899	27.9787	9.62994	29.1742		0.34685	2.61728	0.630117	1.02729	1.15538	0.506884
2022/11/01 02:01:06	2022/11/20 02:03:25	37.9702	18.6076	10.7402	15.6119		4.45797	1.6591	1.4758	1.37074	2.2409	0.74142		18.2994	8.54221	14.4865	11.1082		1.14163	0.517755	0.71891	0.41727	0.698891	0.160348		20.4774	22.191	39.1051	13.6777		2.26971	2.26587	3.39864	1.49076	2.35624	0.392779		21.9899	28.0616	9.62994	29.1742		0.34685	2.70017	0.630117	1.02729	1.17611	0.526837
2022/11/01 02:06:06	2022/11/20 02:08:25	38.1041	18.6076	10.783	15.6462		4.59189	1.6591	1.51859	1.405	2.29364	0.767842		18.3056	8.54221	14.4869	11.1082		1.14779	0.517755	0.71927	0.41727	0.700521	0.16177		20.4774	22.191	39.3169	13.6777		2.26971	2.26587	3.6105	1.49076	2.40921	0.440327		21.9922	28.0981	9.62994	29.1742		0.34913	2.73665	0.630117	1.02729	1.1858	0.53534
2022/11/01 02:11:06	2022/11/20 02:13:25	38.2598	18.6076	10.7875	15.7051		4.74753	1.6591	1.5231	1.46394	2.34842	0.800747		18.3056	8.54221	14.4968	11.1082		1.14779	0.517755	0.72923	0.41727	0.703011	0.161886		20.4774	22.191	39.5281	13.6861		2.26971	2.26587	3.8217	1.49918	2.46412	0.487445		21.9924	28.0981	9.62994	29.1742		0.34934	2.73665	0.630117	1.02729	1.18585	0.535312
2022/11/01 02:16:06	2022/11/20 02:18:25	38.4123	18.6076	10.7958	15.7581		4.90001	1.6591	1.53134	1.51695	2.40185	0.833333		18.3056	8.54221	14.5465	11.1082		1.14779	0.517755	0.77889	0.41727	0.715426	0.163028		20.4774	22.191	39.6033	13.7306		2.26971	2.26587	3.8969	1.54369	2.49404	0.497792		21.9924	28.148	9.62994	29.1742		0.34934	2.78655	0.630117	1.02729	1.19832	0.547369
2022/11/01 02:21:06	2022/11/20 02:23:25	38.4619	18.6076	10.7959	15.7672		4.9496	1.6591	1.53152	1.52608	2.41657	0.844901		18.3056	8.54221	14.5622	11.1082		1.14779	0.517755	0.79456	0.41727	0.719344	0.163582		20.4774	22.191	39.6033	13.7792		2.26971	2.26587	3.8969	1.59233	2.5062	0.490144		21.9924	28.4282	9.62994	29.1742		0.34934	3.06675	0.630117	1.02729	1.26837	0.615377
2022/11/01 02:26:06	2022/11/20 02:28:25	38.4619	18.6076	10.7959	15.7695		4.9496	1.6591	1.53152	1.5283	2.41713	0.844706		18.3056	8.5553	14.5622	11.1082		1.14779	0.53085	0.79456	0.41727	0.722618	0.162265		20.4774	22.191	39.6033	13.82		2.26971	2.26587	3.8969	1.63311	2.5164	0.483873		21.9924	28.7372	9.62994	29.1742		0.34934	3.37574	0.630117	1.02729	1.34562	0.690847
2022/11/01 02:31:06	2022/11/20 02:33:25	38.4619	18.6076	10.7959	15.7706		4.9496	1.65912	1.53152	1.52939	2.41741	0.844609		18.3056	8.58828	14.5622	11.1082		1.14779	0.563831	0.79456	0.41727	0.730863	0.159197		20.4774	22.221	39.6033	13.8245		2.26971	2.29592	3.8969	1.63764	2.52504	0.481938		21.9924	29.0103	9.62994	29.1742		0.34934	3.64889	0.630117	1.02729	1.41391	0.757862
2022/11/01 02:36:06	2022/11/20 02:38:25	38.4619	18.6482	10.7959	15.7722		4.9496	1.6997	1.53152	1.53102	2.42796	0.841484		18.3056	8.61752	14.5622	11.1082		1.14779	0.593062	0.79456	0.41727	0.738171	0.156791		20.4976	22.3156	39.6033	13.8245		2.28995	2.39046	3.8969	1.63764	2.55374	0.477804		22.0048	29.0519	9.62994	29.1742		0.3617	3.6904	0.630117	1.02729	1.42738	0.766629
2022/11/01 02:41:06	2022/11/20 02:43:25	38.4619	18.7142	10.7959	15.7722		4.9496	1.76568	1.53152	1.53102	2.44445	0.836874		18.3056	8.62186	14.5622	11.1082		1.14779	0.597406	0.79456	0.41727	0.739257	0.15646		20.6036	22.4014	39.6033	13.8245		2.39589	2.47625	3.8969	1.63764	2.60167	0.471262		22.0387	29.0519	9.62994	29.1742		0.39564	3.6904	0.630117	1.02729	1.43586	0.762734
2022/11/01 02:46:06	2022/11/20 02:48:25	38.4619	18.7429	10.7959	15.7722		4.9496	1.79443	1.53152	1.53102	2.45164	0.83496		18.3056	8.62186	14.5622	11.1082		1.14779	0.597406	0.79456	0.41727	0.739257	0.15646		20.7191	22.4147	39.6033	13.8245		2.51148	2.48958	3.8969	1.63764	2.6339	0.467575		22.073	29.0519	9.62994	29.1742		0.42997	3.6904	0.630117	1.02729	1.44444	0.758871
2022/11/01 02:51:06	2022/11/20 02:53:25	38.4619	18.754	10.7959	15.7722		4.9496	1.80554	1.53152	1.53102	2.45442	0.834235		18.3056	8.62186	14.5622	11.1082		1.14779	0.597406	0.79456	0.41727	0.739257	0.15646		20.807	22.4147	39.6033	13.8245		2.59932	2.48958	3.8969	1.63764	2.65586	0.466172		22.1074	29.0519	9.62994	29.1742		0.4643	3.6904	0.630117	1.02729	1.45303	0.755086
2022/11/01 02:56:06	2022/11/20 02:58:25	38.4619	18.754	10.7959	15.7927		4.9496	1.80554	1.53152	1.55152	2.45954	0.832358		18.3056	8.62186	14.5622	11.1082		1.14779	0.597406	0.79456	0.41727	0.739257	0.15646		20.8206	22.4147	39.6033	13.8245		2.6129	2.48958	3.8969	1.63764	2.65926	0.466047		22.1399	29.0519	9.62994	29.1742		0.49678	3.6904	0.630117	1.02729	1.46115	0.751577
2022/11/01 03:01:06	2022/11/20 03:03:25	38.4619	18.754	10.7959	15.8529		4.9496	1.80554	1.53152	1.61174	2.4746	0.827002		18.3056	8.62186	14.5622	11.1082		1.14779	0.597406	0.79456	0.41727	0.739257	0.15646		20.8295	22.4147	39.6034	13.8245		2.62187	2.48958	3.89698	1.63764	2.66152	0.465996		22.1574	29.0519	9.62994	29.1742		0.5143	3.6904	0.630117	1.02729	1.46553	0.749714
2022/11/01 03:06:06	2022/11/20 03:08:25	38.4619	18.754	10.7959	15.9046		4.9496	1.80554	1.53152	1.66342	2.48752	0.822598		18.3056	8.62188	14.5622	11.1082		1.14779	0.597427	0.79456	0.41727	0.739262	0.156458		20.8299	22.4147	39.6612	13.8245		2.62223	2.48958	3.95481	1.63764	2.67607	0.478817		22.1932	29.0519	9.62994	29.1742		0.55009	3.6904	0.630117	1.02729	1.47447	0.745974
2022/11/01 03:11:06	2022/11/20 03:13:25	38.4619	18.754	10.7967	15.9106		4.9496	1.80554	1.53227	1.66939	2.4892	0.822028		18.3056	8.63519	14.5622	11.1082		1.14779	0.610734	0.79456	0.41727	0.742589	0.155485		20.8299	22.4147	39.7632	13.8245		2.62223	2.48958	4.05682	1.63764	2.70157	0.501654		22.22	29.0519	9.62994	29.1742		0.57696	3.6904	0.630117	1.02729	1.48119	0.743224
2022/11/01 03:16:06	2022/11/20 03:18:25	38.4711	18.754	10.8112	15.9106		4.95881	1.80554	1.54682	1.66939	2.49514	0.822921		18.3056	8.65838	14.5622	11.1082		1.14779	0.63393	0.79456	0.41727	0.748388	0.153946		20.8299	22.4352	39.788	13.8245		2.62223	2.51015	4.08157	1.63764	2.7129	0.506522		22.2213	29.0519	9.62994	29.1836		0.57817	3.6904	0.630117	1.03666	1.48384	0.742628
2022/11/01 03:21:06	2022/11/20 03:23:25	38.6624	18.754	10.831	15.9106		5.15009	1.80554	1.56656	1.66939	2.54789	0.868778		18.3056	8.66377	14.5622	11.1082		1.14779	0.639316	0.79456	0.41727	0.749734	0.153618		20.8299	22.6398	39.788	13.831		2.62223	2.71467	4.08157	1.6441	2.76564	0.501056		22.2221	29.0519	9.63396	29.1843		0.57906	3.6904	0.63414	1.03739	1.48525	0.742116
2022/11/01 03:26:06	2022/11/20 03:28:25	38.9244	18.754	10.8507	15.9106		5.41216	1.80554	1.5863	1.66939	2.61835	0.932367		18.3185	8.66377	14.5622	11.1082		1.16067	0.639316	0.79456	0.41727	0.752954	0.156408		20.8299	22.671	39.788	13.8335		2.62223	2.74593	4.08157	1.64659	2.77408	0.500384		22.234	29.0519	9.64906	29.29		0.59097	3.6904	0.649236	1.14311	1.51843	0.734507
2022/11/01 03:31:06	2022/11/20 03:33:25	39.1099	18.754	10.8705	15.9115		5.59765	1.80554	1.60604	1.67037	2.6699	0.976802		18.3754	8.66377	14.5622	11.1082		1.21764	0.639316	0.79456	0.41727	0.767197	0.16893		20.8299	22.671	39.788	13.8335		2.62223	2.74593	4.08157	1.64659	2.77408	0.500384		22.2342	29.0519	9.6584	29.3114		0.59109	3.6904	0.658575	1.1645	1.52614	0.732677
2022/11/01 03:36:06	2022/11/20 03:38:25	39.1551	18.754	10.8829	15.9124		5.64284	1.80554	1.61846	1.6712	2.68451	0.986896		18.4361	8.66377	14.5622	11.1082		1.2783	0.639316	0.79456	0.41727	0.782362	0.182542		20.8299	22.671	39.788	13.8335		2.62223	2.74593	4.08157	1.64659	2.77408	0.500384		22.2342	29.0519	9.676	29.3114		0.59109	3.6904	0.676182	1.1645	1.53054	0.730951
2022/11/01 03:41:06	2022/11/20 03:43:25	39.1868	18.754	10.8831	15.9124		5.67459	1.80554	1.61865	1.6712	2.69249	0.99481		18.4737	8.66377	14.5622	11.1082		1.31591	0.639316	0.79456	0.41727	0.791764	0.191098		20.8299	22.671	39.788	13.8335		2.62223	2.74593	4.08157	1.64659	2.77408	0.500384		22.2342	29.0521	9.73567	29.3114		0.59109	3.69065	0.735849	1.1645	1.54552	0.725331
2022/11/01 03:46:06	2022/11/20 03:48:25	39.1868	18.754	10.8831	15.9124		5.67459	1.80554	1.61865	1.6712	2.69249	0.99481		18.4742	8.66377	14.5622	11.1082		1.31641	0.639316	0.79456	0.41727	0.791889	0.191213		20.8299	22.671	39.788	13.8335		2.62223	2.74593	4.08157	1.64659	2.77408	0.500384		22.2342	29.1724	9.77162	29.3379		0.59109	3.81089	0.771798	1.191	1.59119	0.75049
2022/11/01 03:51:06	2022/11/20 03:53:25	39.1868	18.754	10.8831	15.9124		5.67459	1.80554	1.61865	1.6712	2.69249	0.99481		18.4742	8.66377	14.5622	11.1082		1.31641	0.639316	0.79456	0.41727	0.791889	0.191213		20.8299	22.671	39.788	13.8335		2.62223	2.74593	4.08157	1.64659	2.77408	0.500384		22.2342	29.1907	9.7755	29.414		0.59109	3.82919	0.775675	1.26712	1.61577	0.751472
2022/11/01 03:56:06	2022/11/20 03:58:25	39.1868	18.754	10.8831	15.9124		5.67459	1.80554	1.61865	1.6712	2.69249	0.99481		18.4742	8.66377	14.5624	11.1094		1.31641	0.639316	0.79479	0.41846	0.792244	0.191019		20.8299	22.671	39.788	13.8505		2.62223	2.74593	4.08157	1.6636	2.77833	0.497198		22.2342	29.1907	9.7771	29.4894		0.59109	3.82919	0.777282	1.34252	1.63502	0.748634
2022/11/01 04:01:06	2022/11/20 04:03:25	39.1868	18.754	10.8831	15.9124		5.67459	1.80554	1.61865	1.6712	2.69249	0.99481		18.4742	8.66377	14.5657	11.1132		1.31641	0.639316	0.79813	0.42229	0.794037	0.1904		20.8299	22.671	39.788	13.8893		2.62223	2.74593	4.08157	1.70243	2.78804	0.489986		22.2342	29.1907	9.7771	29.5922		0.59109	3.82919	0.777282	1.44523	1.6607	0.745725
2022/11/01 04:06:06	2022/11/20 04:08:25	39.1868	18.754	10.8831	15.9185		5.67459	1.80554	1.61865	1.67736	2.69403	0.994284		18.4742	8.66377	14.57	11.114		1.31641	0.639316	0.80242	0.42308	0.795307	0.190282		20.8299	22.671	39.788	13.9282		2.62223	2.74593	4.08157	1.74134	2.79777	0.482846		22.2342	29.1907	9.7771	29.6734		0.59109	3.82919	0.777282	1.52648	1.68101	0.744043
2022/11/01 04:11:06	2022/11/20 04:13:25	39.1868	18.754	10.8831	15.9778		5.67459	1.80554	1.61865	1.73665	2.70886	0.98933		18.4742	8.66377	14.5743	11.114		1.31641	0.639316	0.80671	0.42308	0.796379	0.190298		20.8299	22.671	39.788	13.9658		2.62223	2.74593	4.08157	1.77895	2.80717	0.476033		22.2342	29.1907	9.7771	29.6734		0.59109	3.82919	0.777282	1.52648	1.68101	0.744043
2022/11/01 04:16:06	2022/11/20 04:18:25	39.1868	18.754	10.8831	16.0494		5.67459	1.80554	1.61865	1.80818	2.72674	0.983618		18.4742	8.66377	14.5786	11.114		1.31641	0.639316	0.811	0.42308	0.797452	0.19032		20.8299	22.8558	39.788	13.9765		2.62223	2.93071	4.08157	1.78965	2.85604	0.474285		22.2342	29.1907	9.7771	29.7141		0.59109	3.82919	0.777282	1.56713	1.69117	0.743409
2022/11/01 04:21:06	2022/11/20 04:23:25	39.1868	18.754	10.8863	16.1088		5.67459	1.80554	1.6219	1.8676	2.74241	0.978785		18.4742	8.66377	14.5829	11.114		1.31641	0.639316	0.81526	0.42308	0.798517	0.190349		20.8299	22.8806	39.8479	13.9765		2.62223	2.95551	4.14146	1.78965	2.87721	0.487533		22.2342	29.1907	9.7771	29.8194		0.59109	3.82919	0.777282	1.67244	1.7175	0.74241
2022/11/01 04:26:06	2022/11/20 04:28:25	39.1869	18.7736	10.894	16.1164		5.67466	1.82512	1.6296	1.87526	2.75116	0.97594		18.4742	8.66377	14.5845	11.114		1.31641	0.639319	0.81686	0.42308	0.798917	0.190361		20.8338	22.8806	40.0601	13.9765		2.62613	2.95551	4.35367	1.78965	2.93124	0.533871		22.2342	29.1907	9.7771	29.8257		0.59109	3.82919	0.777282	1.67882	1.7191	0.74238
2022/11/01 04:31:06	2022/11/20 04:33:25	39.2171	18.8362	10.8992	16.1185		5.70489	1.88768	1.6348	1.87729	2.77616	0.977988		18.4742	8.70711	14.5845	11.114		1.31641	0.682656	0.81686	0.42308	0.809752	0.187621		20.8405	22.8806	40.2798	13.9765		2.63282	2.95551	4.57333	1.78965	2.98783	0.582847		22.2342	29.1907	9.7771	29.8301		0.59109	3.82919	0.777282	1.68322	1.7202	0.742361
2022/11/01 04:36:06	2022/11/20 04:38:25	39.2621	18.8927	10.8994	16.1185		5.74988	1.94423	1.63495	1.87729	2.80159	0.985007		18.4742	8.79143	14.5845	11.114		1.31641	0.766977	0.81686	0.42308	0.830832	0.184011		20.8405	22.8806	40.3842	13.9765		2.63282	2.95551	4.67776	1.78965	3.01394	0.60662		22.2369	29.1907	9.7771	29.8431		0.5938	3.82919	0.777282	1.69617	1.72411	0.74197
2022/11/01 04:41:06	2022/11/20 04:43:25	39.2665	18.9012	10.8994	16.1185		5.75424	1.95273	1.63495	1.87729	2.8048	0.98548		18.5051	8.82235	14.5853	11.1294		1.34733	0.797897	0.81773	0.43852	0.850369	0.187174		20.8405	22.8806	40.3842	13.9765		2.63282	2.95551	4.67776	1.78965	3.01394	0.60662		22.3434	29.1907	9.7771	29.8549		0.7003	3.82919	0.777282	1.70795	1.75368	0.728743
2022/11/01 04:46:06	2022/11/20 04:48:25	39.2665	18.9012	10.8994	16.1185		5.75424	1.95273	1.63495	1.87729	2.8048	0.98548		18.5926	8.82235	14.6431	11.1716		1.43481	0.797897	0.87545	0.48069	0.897212	0.198503		20.8405	22.8806	40.3842	13.9765		2.63282	2.95551	4.67776	1.78965	3.01394	0.60662		22.4779	29.1907	9.7771	29.8706		0.83487	3.82919	0.777282	1.72364	1.79125	0.713008
2022/11/01 04:51:06	2022/11/20 04:53:25	39.2665	18.9012	10.8994	16.1185		5.75424	1.95273	1.63495	1.87729	2.8048	0.98548		18.6704	8.82235	14.6532	11.1887		1.51264	0.797897	0.8856	0.49775	0.923472	0.213222		20.8405	23.074	40.3842	13.9765		2.63282	3.14891	4.67776	1.78965	3.06229	0.606994		22.5035	29.1907	9.7771	29.9256		0.86045	3.82919	0.777282	1.77866	1.8114	0.709827
2022/11/01 04:56:06	2022/11/20 04:58:25	39.2665	18.9012	10.8994	16.1185		5.75424	1.95273	1.63495	1.87729	2.8048	0.98548		18.6826	8.82235	14.6532	11.1887		1.52485	0.797897	0.8856	0.49775	0.926524	0.216036		20.8405	23.2281	40.3842	13.9765		2.63282	3.30295	4.67776	1.78965	3.1008	0.61004		22.5191	29.1907	9.77711	29.9377		0.87601	3.82919	0.777286	1.79082	1.81833	0.708052
2022/11/01 05:01:06	2022/11/20 05:03:25	39.2665	18.9012	10.8994	16.1206		5.75424	1.95273	1.63495	1.87944	2.80534	0.985311		18.7002	8.82235	14.6532	11.1887		1.5424	0.797897	0.8856	0.49775	0.930912	0.220093		20.8405	23.2281	40.4469	13.9765		2.63282	3.30295	4.74044	1.78965	3.11647	0.623593		22.521	29.1907	9.79015	29.9471		0.8779	3.82919	0.790333	1.80014	1.82439	0.706218
2022/11/01 05:06:06	2022/11/20 05:08:25	39.2665	18.9012	10.8994	16.1886		5.75424	1.95273	1.63495	1.94741	2.82233	0.980122		18.7028	8.82235	14.6532	11.1887		1.54499	0.797897	0.8856	0.49775	0.931559	0.220693		20.8405	23.2281	40.6178	13.9765		2.63282	3.30295	4.91134	1.78965	3.15919	0.661022		22.5281	29.1907	9.81533	29.9803		0.88498	3.82919	0.81551	1.8334	1.84077	0.702292
2022/11/01 05:11:06	2022/11/20 05:13:25	39.2665	18.9012	10.8994	16.2876		5.75424	1.95273	1.63495	2.0464	2.84708	0.973045		18.7028	8.82235	14.6532	11.1887		1.54499	0.797897	0.8856	0.49775	0.931559	0.220693		20.8405	23.2281	40.7906	13.9882		2.63282	3.30295	5.08414	1.80129	3.2053	0.697529		22.5283	29.1907	9.83564	30.0181		0.88519	3.82919	0.835822	1.87117	1.85534	0.699818
2022/11/01 05:16:06	2022/11/20 05:18:25	39.2665	18.9012	10.8994	16.3739		5.75424	1.95273	1.63495	2.13277	2.86867	0.967345		18.7028	8.82235	14.6532	11.1887		1.54499	0.797897	0.8856	0.49775	0.931559	0.220693		20.8405	23.2319	40.9374	14.0585		2.63282	3.30677	5.23097	1.87157	3.26053	0.719259		22.5283	29.1907	9.84152	30.0558		0.88519	3.82919	0.841695	1.90893	1.86625	0.699235
2022/11/01 05:21:06	2022/11/20 05:23:25	39.2736	18.9012	10.8994	16.3861		5.76137	1.95273	1.63495	2.1449	2.87349	0.968352		18.7028	8.82235	14.6569	11.1887		1.54499	0.797897	0.88927	0.49775	0.932477	0.220631		20.8405	23.2674	40.9595	14.1369		2.63282	3.34234	5.25309	1.94996	3.29455	0.712038		22.5283	29.1907	9.84533	30.0936		0.88519	3.82919	0.845508	1.9467	1.87665	0.699021
2022/11/01 05:26:06	2022/11/20 05:28:25	39.3944	18.9012	10.8997	16.3861		5.88215	1.95273	1.63531	2.1449	2.90377	0.998336		18.7028	8.82235	14.6737	11.1887		1.54499	0.797897	0.90612	0.49775	0.936689	0.220396		20.8405	23.3464	40.9844	14.2036		2.63282	3.42131	5.27803	2.01671	3.33722	0.707916		22.5283	29.1907	9.84895	30.1314		0.88519	3.82919	0.849133	1.98446	1.88699	0.698951
2022/11/01 05:31:06	2022/11/20 05:33:25	39.5546	18.9012	10.9171	16.3861		6.04236	1.95273	1.65264	2.1449	2.94816	1.03636		18.7028	8.82235	14.6917	11.1887		1.54499	0.797897	0.92414	0.49775	0.941194	0.220234		20.8405	23.3507	41.0119	14.2117		2.63282	3.42556	5.3055	2.02483	3.34718	0.71298		22.5283	29.1995	9.8537	30.1691		0.88519	3.83802	0.853884	2.02223	1.89983	0.700896
2022/11/01 05:36:06	2022/11/20 05:38:25	39.653	18.9012	10.9437	16.3861		6.14078	1.95273	1.67925	2.1449	2.97941	1.05811		18.7028	8.82235	14.7098	11.1887		1.54499	0.797897	0.94216	0.49775	0.945699	0.220164		20.8405	23.3514	41.0394	14.2117		2.63282	3.42629	5.33297	2.02483	3.35423	0.719279		22.5432	29.2194	9.85386	30.2054		0.90013	3.85794	0.854043	2.05846	1.91764	0.704223
2022/11/01 05:41:06	2022/11/20 05:43:25	39.6679	19.0147	10.9688	16.3861		6.15565	2.06621	1.70439	2.1449	3.01779	1.05034		18.7028	8.82235	14.7278	11.1887		1.54499	0.797897	0.96019	0.49775	0.950207	0.220186		20.8405	23.3628	41.0669	14.2117		2.63282	3.4377	5.36043	2.02483	3.36395	0.72567		22.5645	29.2233	9.85386	30.3598		0.92143	3.86187	0.854043	2.2129	1.96256	0.706093
2022/11/01 05:46:06	2022/11/20 05:48:25	39.7648	19.5029	10.9758	16.3861		6.2525	2.55443	1.71137	2.1449	3.1658	1.0432		18.7028	8.82235	14.7407	11.1887		1.54499	0.797897	0.97308	0.49775	0.953429	0.220258		20.8405	23.6698	41.0898	14.2117		2.63282	3.74472	5.38341	2.02483	3.44645	0.737325		22.5645	29.2853	9.86296	30.7362		0.92145	3.92387	0.863141	2.58928	2.07444	0.734965
2022/11/01 05:51:06	2022/11/20 05:53:25	39.7975	19.7393	10.9764	16.3861		6.28523	2.79084	1.71202	2.1449	3.23325	1.04119		18.7028	8.82235	14.7412	11.1952		1.54499	0.797897	0.97362	0.50431	0.955204	0.219134		20.8405	23.8708	41.0998	14.2117		2.63282	3.94573	5.39334	2.02483	3.49918	0.74786		22.5755	29.4122	9.90793	30.7639		0.93238	4.0507	0.908111	2.61697	2.12704	0.755728
2022/11/01 05:56:06	2022/11/20 05:58:25	39.7982	19.7425	10.9764	16.3861		6.28598	2.79397	1.71202	2.1449	3.23422	1.04126		18.7028	9.05122	14.7412	11.2286		1.54499	1.02677	0.97362	0.53769	1.02077	0.206243		20.8405	23.8709	41.1228	14.2117		2.63282	3.94578	5.41637	2.02483	3.50495	0.75273		22.5939	29.4122	9.93752	30.7639		0.95086	4.0507	0.937702	2.61697	2.13906	0.749324
2022/11/01 06:01:06	2022/11/20 06:03:25	39.8686	19.8011	10.9764	16.3861		6.35636	2.85256	1.71202	2.1449	3.26646	1.05645		18.7028	9.07008	14.7412	11.2426		1.54499	1.04563	0.97362	0.55171	1.02899	0.203592		20.8405	23.8825	41.1228	14.2117		2.63282	3.95737	5.41637	2.02483	3.50785	0.753301		22.594	29.4122	9.93784	30.7639		0.95089	4.0507	0.938023	2.61697	2.13915	0.749278
2022/11/01 06:06:06	2022/11/20 06:08:25	39.8814	19.8457	10.9764	16.3861		6.36913	2.89725	1.71202	2.1449	3.28082	1.05815		18.7028	9.0942	14.7412	11.2426		1.54499	1.06975	0.97362	0.55171	1.03502	0.203845		20.8405	23.8989	41.1228	14.2117		2.63282	3.97382	5.41637	2.02483	3.51196	0.754129		22.594	29.4122	9.93784	30.7639		0.95089	4.0507	0.938023	2.61697	2.13915	0.749278
2022/11/01 06:11:06	2022/11/20 06:13:25	39.8814	19.8459	10.9764	16.4759		6.36913	2.89744	1.71202	2.23469	3.30332	1.05032		18.7043	9.09426	14.7425	11.2426		1.54652	1.06981	0.97489	0.55171	1.03573	0.204133		20.8405	23.9003	41.1228	14.2117		2.63282	3.97519	5.41637	2.02483	3.5123	0.754199		22.594	29.4122	9.93784	30.7639		0.95089	4.0507	0.938023	2.61697	2.13915	0.749278
2022/11/01 06:16:06	2022/11/20 06:18:25	39.8814	19.8459	10.9764	16.4759		6.36913	2.89744	1.71202	2.23469	3.30332	1.05032		18.7161	9.09426	14.743	11.2426		1.55833	1.06981	0.97539	0.55171	1.03881	0.206589		20.8405	23.9003	41.1228	14.2117		2.63282	3.97519	5.41637	2.02483	3.5123	0.754199		22.594	29.4122	9.93784	30.7639		0.95095	4.0507	0.938023	2.61697	2.13916	0.74927
2022/11/01 06:21:06	2022/11/20 06:23:25	39.8814	19.8459	10.9764	16.4759		6.36913	2.89744	1.71202	2.23469	3.30332	1.05032		18.7298	9.09426	14.743	11.2426		1.57201	1.06981	0.97539	0.55171	1.04223	0.209465		20.8405	23.9003	41.1228	14.2117		2.63282	3.97519	5.41637	2.02483	3.5123	0.754199		22.5999	29.4122	9.93784	30.7639		0.95682	4.0507	0.938023	2.61697	2.14063	0.748495
2022/11/01 06:26:06	2022/11/20 06:28:25	39.8814	19.8459	10.9764	16.4759		6.36913	2.89744	1.71202	2.23469	3.30332	1.05032		18.7355	9.09426	14.743	11.2426		1.57767	1.06981	0.97539	0.55171	1.04364	0.210659		20.8405	23.9003	41.1228	14.2117		2.63282	3.97519	5.41637	2.02483	3.5123	0.754199		22.6058	29.4693	9.93784	30.7639		0.96275	4.10787	0.938023	2.61697	2.1564	0.759912
2022/11/01 06:31:06	2022/11/20 06:33:25	39.8814	19.8459	10.9764	16.4759		6.36913	2.89744	1.71202	2.23469	3.30332	1.05032		18.7355	9.09426	14.743	11.2426		1.57767	1.06981	0.97539	0.55171	1.04364	0.210659		20.8405	23.9003	41.1228	14.2117		2.63282	3.97519	5.41637	2.02483	3.5123	0.754199		22.6079	29.5254	9.93784	30.7639		0.96482	4.16391	0.938023	2.61697	2.17093	0.771669
2022/11/01 06:36:06	2022/11/20 06:38:25	39.8814	19.8459	10.9764	16.4759		6.36913	2.89744	1.71202	2.23469	3.30332	1.05032		18.7355	9.09426	14.743	11.2426		1.57767	1.06981	0.97539	0.55171	1.04364	0.210659		20.8405	23.9003	41.1228	14.2117		2.63282	3.97519	5.41637	2.02483	3.5123	0.754199		22.6079	29.5254	9.93784	30.7639		0.96482	4.16391	0.938023	2.61697	2.17093	0.771669
2022/11/01 06:41:06	2022/11/20 06:43:25	39.8814	19.8459	10.9764	16.4759		6.36913	2.89744	1.71202	2.23469	3.30332	1.05032		18.7355	9.09426	14.743	11.2426		1.57767	1.06981	0.97539	0.55171	1.04364	0.210659		20.8438	23.9003	41.1228	14.2117		2.63608	3.97519	5.41637	2.02483	3.51312	0.753883		22.6079	29.5254	9.93784	30.7639		0.96482	4.16391	0.938023	2.61697	2.17093	0.771669
2022/11/01 06:46:06	2022/11/20 06:48:25	39.8814	19.8459	10.9764	16.4759		6.36913	2.89744	1.71202	2.23469	3.30332	1.05032		18.7355	9.09426	14.743	11.2426		1.57767	1.06981	0.97539	0.55171	1.04364	0.210659		20.8459	23.9003	41.1228	14.2117		2.63827	3.97519	5.41637	2.02483	3.51367	0.753671		22.6079	29.5408	9.93784	30.7639		0.96482	4.17938	0.938023	2.61697	2.1748	0.775001
2022/11/01 06:51:06	2022/11/20 06:53:25	39.8814	19.8459	10.9764	16.4759		6.36913	2.89744	1.71202	2.23469	3.30332	1.05032		18.7355	9.09426	14.743	11.2426		1.57767	1.06981	0.97539	0.55171	1.04364	0.210659		20.8459	23.9003	41.1228	14.2117		2.63827	3.97519	5.41637	2.02483	3.51367	0.753671		22.6079	29.58	9.93784	30.7639		0.96482	4.21853	0.938023	2.61697	2.18459	0.783456
2022/11/01 06:56:06	2022/11/20 06:58:25	39.8814	19.8459	10.9764	16.4759		6.36913	2.89744	1.71202	2.23469	3.30332	1.05032		18.7355	9.09426	14.743	11.2426		1.57767	1.06981	0.97539	0.55171	1.04364	0.210659		20.8459	23.9003	41.1228	14.2143		2.63827	3.97519	5.41637	2.02743	3.51432	0.753243		22.6079	29.58	9.93784	30.7639		0.96482	4.21853	0.938023	2.61697	2.18459	0.783456
2022/11/01 07:01:06	2022/11/20 07:03:25	39.8814	19.8459	10.9764	16.4759		6.36913	2.89744	1.71202	2.23469	3.30332	1.05032		18.7355	9.09426	14.743	11.2426		1.57767	1.06981	0.97539	0.55171	1.04364	0.210659		20.8459	23.9003	41.1228	14.2171		2.63827	3.97519	5.41637	2.03016	3.515	0.752794		22.6079	29.58	9.93784	30.7639		0.96482	4.21853	0.938023	2.61697	2.18459	0.783456
2022/11/01 07:06:06	2022/11/20 07:08:25	39.8814	19.8459	10.9764	16.4759		6.36913	2.89744	1.71202	2.23469	3.30332	1.05032		18.7355	9.09426	14.743	11.2426		1.57767	1.06981	0.97539	0.55171	1.04364	0.210659		20.8459	23.9003	41.1228	14.2171		2.63827	3.97519	5.41637	2.03018	3.515	0.752791		22.6079	29.58	9.93784	30.7639		0.96482	4.21853	0.938023	2.61697	2.18459	0.783456
2022/11/01 07:11:06	2022/11/20 07:13:25	39.8814	19.8459	10.9764	16.4759		6.36913	2.89744	1.71202	2.23469	3.30332	1.05032		18.7355	9.09426	14.743	11.2426		1.57767	1.06981	0.97539	0.55171	1.04364	0.210659		20.8459	23.9003	41.1228	14.2315		2.63827	3.97519	5.41637	2.04464	3.51862	0.750419		22.6079	29.58	9.93784	30.7639		0.96482	4.21853	0.938023	2.61697	2.18459	0.783456
2022/11/01 07:16:06	2022/11/20 07:18:25	39.8814	19.8459	10.9764	16.4759		6.36913	2.89744	1.71202	2.23469	3.30332	1.05032		18.7355	9.09426	14.743	11.2426		1.57767	1.06981	0.97539	0.55171	1.04364	0.210659		20.8459	23.9003	41.1228	14.274		2.63827	3.97519	5.41637	2.08713	3.52924	0.743507		22.6079	29.58	9.93784	30.7639		0.96482	4.21853	0.938023	2.61697	2.18459	0.783456
2022/11/01 07:21:06	2022/11/20 07:23:25	39.8814	19.8459	10.9764	16.4759		6.36913	2.89744	1.71202	2.23469	3.30332	1.05032		18.7355	9.09426	14.743	11.2426		1.57767	1.06981	0.97539	0.55171	1.04364	0.210659		20.8459	23.9003	41.1228	14.3171		2.63827	3.97519	5.41637	2.1302	3.54001	0.736592		22.6079	29.58	9.93784	30.7639		0.96482	4.21853	0.938023	2.61697	2.18459	0.783456
2022/11/01 07:26:06	2022/11/20 07:28:25	39.8814	19.8459	10.9764	16.4759		6.36913	2.89744	1.71202	2.23469	3.30332	1.05032		18.7355	9.09426	14.743	11.2426		1.57767	1.06981	0.97539	0.55171	1.04364	0.210659		20.8459	23.9003	41.1228	14.3354		2.63827	3.97519	5.41637	2.14855	3.5446	0.733673		22.6079	29.58	9.93784	30.7639		0.96482	4.21853	0.938023	2.61697	2.18459	0.783456
2022/11/01 07:31:06	2022/11/20 07:33:25	39.8814	19.8459	10.9764	16.4759		6.36913	2.89744	1.71202	2.23469	3.30332	1.05032		18.7355	9.09426	14.743	11.2426		1.57767	1.06981	0.97539	0.55171	1.04364	0.210659		20.8459	23.9003	41.1228	14.3354		2.63827	3.97519	5.41637	2.14855	3.5446	0.733673		22.6079	29.58	9.93784	30.7639		0.96482	4.21853	0.938023	2.61697	2.18459	0.783456
2022/11/01 07:36:06	2022/11/20 07:38:25	39.8814	19.8459	10.9764	16.4759		6.36913	2.89744	1.71202	2.23469	3.30332	1.05032		18.7355	9.09426	14.743	11.2426		1.57767	1.06981	0.97539	0.55171	1.04364	0.210659		20.8459	23.9003	41.1228	14.3354		2.63827	3.97519	5.41637	2.14855	3.5446	0.733673		22.6079	29.58	9.93784	30.7639		0.96482	4.21853	0.938023	2.61697	2.18459	0.783456
2022/11/01 07:41:06	2022/11/20 07:43:25	39.8814	19.8459	10.9764	16.4759		6.36913	2.89744	1.71202	2.23469	3.30332	1.05032		18.7355	9.09426	14.743	11.2426		1.57767	1.06981	0.97539	0.55171	1.04364	0.210659		20.8459	23.9003	41.133	14.3354		2.63827	3.97519	5.42658	2.14855	3.54715	0.735845		22.6079	29.58	9.93784	30.7639		0.96482	4.21853	0.938023	2.61697	2.18459	0.783456
2022/11/01 07:46:06	2022/11/20 07:48:25	39.8814	19.8459	10.9764	16.4759		6.36913	2.89744	1.71202	2.23469	3.30332	1.05032		18.7355	9.09426	14.743	11.2426		1.57767	1.06981	0.97539	0.55171	1.04364	0.210659		20.8459	23.9003	41.1644	14.3354		2.63827	3.97519	5.45797	2.14855	3.555	0.742538		22.6079	29.58	9.93784	30.7639		0.96482	4.21853	0.938023	2.61697	2.18459	0.783456
2022/11/01 07:51:06	2022/11/20 07:53:25	39.8814	19.8459	10.9764	16.4759		6.36913	2.89744	1.71202	2.23469	3.30332	1.05032		18.7553	9.09426	14.743	11.2426		1.59756	1.06981	0.97539	0.55171	1.04862	0.214877		20.8459	23.9003	41.1964	14.3354		2.63827	3.97519	5.49002	2.14855	3.56301	0.749394		22.6079	29.5883	9.93784	30.7639		0.96482	4.22682	0.938023	2.61697	2.18666	0.78525
2022/11/01 07:56:06	2022/11/20 07:58:25	39.8814	19.8459	10.9764	16.4759		6.36913	2.89744	1.71202	2.23469	3.30332	1.05032		18.8903	9.09426	14.743	11.2426		1.73252	1.06981	0.97539	0.55171	1.08236	0.24425		20.8459	23.9003	41.2233	14.3354		2.63827	3.97519	5.51691	2.14855	3.56973	0.755164		22.6079	29.6005	9.93784	30.7639		0.96482	4.23901	0.938023	2.61697	2.18971	0.787891
2022/11/01 08:01:06	2022/11/20 08:03:25	39.8814	19.8459	10.9764	16.4759		6.36913	2.89744	1.71202	2.23469	3.30332	1.05032		18.9571	9.09426	14.743	11.2426		1.79932	1.06981	0.97539	0.55171	1.09906	0.259182		20.8459	23.9003	41.3135	14.3354		2.63827	3.97519	5.60706	2.14855	3.59227	0.774621		22.6079	29.6005	9.93784	30.7639		0.96482	4.23901	0.938023	2.61697	2.18971	0.787891
2022/11/01 08:06:06	2022/11/20 08:08:25	39.956	19.8459	10.9764	16.4759		6.44378	2.89744	1.71202	2.23469	3.32198	1.06849		18.9571	9.09426	14.743	11.2426		1.79932	1.06981	0.97539	0.55171	1.09906	0.259182		20.8459	23.9003	41.4222	14.3354		2.63827	3.97519	5.71578	2.14855	3.61945	0.798301		22.6079	29.6005	9.93784	30.7639		0.96482	4.23901	0.938023	2.61697	2.18971	0.787891
2022/11/01 08:11:06	2022/11/20 08:13:25	40.0277	19.8459	10.9764	16.4759		6.51549	2.89744	1.71202	2.23469	3.33991	1.08596		18.9571	9.09426	14.743	11.2426		1.79932	1.06981	0.97539	0.55171	1.09906	0.259182		20.8459	23.9003	41.4945	14.3354		2.63827	3.97519	5.7881	2.14855	3.63753	0.814174		22.6079	29.6005	9.94337	30.7639		0.96482	4.23901	0.943546	2.61697	2.19109	0.78716
2022/11/01 08:16:06	2022/11/20 08:18:25	40.0277	19.8459	10.9764	16.4759		6.51549	2.89744	1.71202	2.23469	3.33991	1.08596		18.9571	9.09426	14.743	11.2426		1.79932	1.06981	0.97539	0.55171	1.09906	0.259182		20.8459	23.9003	41.5805	14.3354		2.63827	3.97519	5.87411	2.14855	3.65903	0.833169		22.6079	29.6401	9.95541	30.7639		0.96482	4.27863	0.955588	2.61697	2.204	0.794184
2022/11/01 08:21:06	2022/11/20 08:23:25	40.0277	19.8459	10.9764	16.4759		6.51549	2.89744	1.71202	2.23469	3.33991	1.08596		18.9571	9.09426	14.743	11.2426		1.79932	1.06981	0.97539	0.55171	1.09906	0.259182		20.8459	23.9003	41.7293	14.3354		2.63827	3.97519	6.02291	2.14855	3.69623	0.866307		22.6079	29.6863	9.95659	30.7639		0.96482	4.32484	0.956769	2.61697	2.21585	0.804109
2022/11/01 08:26:06	2022/11/20 08:28:25	40.0277	19.8459	10.9764	16.4759		6.51549	2.89744	1.71202	2.23469	3.33991	1.08596		18.9571	9.09426	14.743	11.2426		1.79932	1.06981	0.97539	0.55171	1.09906	0.259182		20.8459	23.9016	41.7304	14.3354		2.63827	3.97649	6.02401	2.14855	3.69683	0.866588		22.6079	29.6863	9.95659	30.7639		0.96482	4.32484	0.956769	2.61697	2.21585	0.804109
2022/11/01 08:31:06	2022/11/20 08:33:25	40.0277	19.8459	10.9764	16.4759		6.51549	2.89744	1.71202	2.23469	3.33991	1.08596		18.9571	9.09426	14.743	11.2426		1.79932	1.06981	0.97539	0.55171	1.09906	0.259182		20.8459	23.9214	41.7304	14.3354		2.63827	3.99626	6.02401	2.14855	3.70177	0.867134		22.6079	29.6863	9.95659	30.7639		0.96482	4.32484	0.956769	2.61697	2.21585	0.804109
2022/11/01 08:36:06	2022/11/20 08:38:25	40.0277	19.8459	10.9764	16.4759		6.51549	2.89744	1.71202	2.23469	3.33991	1.08596		18.9571	9.09426	14.743	11.2426		1.79932	1.06981	0.97539	0.55171	1.09906	0.259182		20.8459	23.9471	41.7304	14.3354		2.63827	4.022	6.02401	2.14855	3.70821	0.867886		22.6079	29.6863	9.95659	30.7812		0.96482	4.32484	0.956769	2.63425	2.22017	0.804839
2022/11/01 08:41:06	2022/11/20 08:43:25	40.0277	19.8495	10.9764	16.4759		6.51549	2.90098	1.71202	2.23469	3.34079	1.08584		18.9571	9.09426	14.743	11.2426		1.79932	1.06981	0.97539	0.55171	1.09906	0.259182		20.8459	23.9592	41.7304	14.3354		2.63827	4.03407	6.02401	2.14855	3.71123	0.868254		22.6079	29.6863	9.95659	30.8161		0.96482	4.32484	0.956769	2.66915	2.22889	0.806381
2022/11/01 08:46:06	2022/11/20 08:48:25	40.0277	19.8544	10.9764	16.4759		6.51549	2.90586	1.71202	2.23469	3.34201	1.08567		18.9571	9.09426	14.743	11.2426		1.79932	1.06981	0.97539	0.55171	1.09906	0.259182		20.8459	23.9592	41.7304	14.3354		2.63827	4.03407	6.02401	2.14855	3.71123	0.868254		22.6079	29.6863	9.95659	30.8375		0.96482	4.32484	0.956769	2.69061	2.23426	0.807374
2022/11/01 08:51:06	2022/11/20 08:53:25	40.0277	19.8574	10.9764	16.4759		6.51549	2.9089	1.71202	2.23469	3.34277	1.08557		18.9571	9.09426	14.743	11.2426		1.79932	1.06981	0.97539	0.55171	1.09906	0.259182		20.8459	23.9597	41.7304	14.3354		2.63827	4.03461	6.02401	2.14855	3.71136	0.868271		22.6079	29.6863	9.95659	30.8476		0.96482	4.32484	0.956769	2.70068	2.23678	0.807853
2022/11/01 08:56:06	2022/11/20 08:58:25	40.0277	19.8575	10.9764	16.4759		6.51549	2.90895	1.71202	2.23469	3.34279	1.08557		18.9571	9.09426	14.743	11.2426		1.79932	1.06981	0.97539	0.55171	1.09906	0.259182		20.8459	23.9812	41.7304	14.3354		2.63827	4.05609	6.02401	2.14855	3.71673	0.868954		22.6085	29.6863	9.95659	30.8618		0.9654	4.32484	0.956769	2.7149	2.24048	0.808464
2022/11/01 09:01:06	2022/11/20 09:03:25	40.0277	19.8575	10.9764	16.4759		6.51549	2.90895	1.71202	2.23469	3.34279	1.08557		18.9571	9.09426	14.743	11.2426		1.79932	1.06981	0.97539	0.55171	1.09906	0.259182		20.8459	23.9883	41.7304	14.3354		2.63827	4.06324	6.02401	2.14855	3.71852	0.869188		22.6198	29.6863	9.95659	30.8675		0.97672	4.32484	0.956769	2.72059	2.24473	0.807258
2022/11/01 09:06:06	2022/11/20 09:08:25	40.0277	19.8575	10.9764	16.4761		6.51549	2.90895	1.71202	2.23488	3.34283	1.08555		18.9571	9.09426	14.743	11.2426		1.79932	1.06981	0.97539	0.55171	1.09906	0.259182		20.8459	23.9883	41.7304	14.3354		2.63827	4.06324	6.02401	2.14855	3.71852	0.869188		22.6198	29.6863	9.95659	30.8675		0.97672	4.32484	0.956769	2.72059	2.24473	0.807258
2022/11/01 09:11:06	2022/11/20 09:13:25	40.0277	19.8575	10.9764	16.478		6.51549	2.90895	1.71202	2.23683	3.34332	1.08539		18.9571	9.09426	14.743	11.2426		1.79932	1.06981	0.97539	0.55171	1.09906	0.259182		20.8459	23.9883	41.7304	14.3354		2.63827	4.06324	6.02401	2.14855	3.71852	0.869188		22.6198	29.6863	9.95659	30.8675		0.97672	4.32484	0.956769	2.72059	2.24473	0.807258
2022/11/01 09:16:06	2022/11/20 09:18:25	40.0277	19.8575	10.9764	16.478		6.51549	2.90895	1.71202	2.23683	3.34332	1.08539		18.9571	9.09426	14.743	11.2426		1.79932	1.06981	0.97539	0.55171	1.09906	0.259182		20.8459	23.9883	41.7304	14.3354		2.63827	4.06324	6.02401	2.14855	3.71852	0.869188		22.6198	29.6863	9.95659	30.8675		0.97672	4.32484	0.956769	2.72059	2.24473	0.807258
2022/11/01 09:21:06	2022/11/20 09:23:25	40.0277	19.8575	10.9764	16.478		6.51549	2.90895	1.71202	2.23683	3.34332	1.08539		18.9571	9.09426	14.743	11.2426		1.79932	1.06981	0.97539	0.55171	1.09906	0.259182		20.8459	23.9883	41.7304	14.3354		2.63827	4.06324	6.02401	2.14855	3.71852	0.869188		22.6198	29.6863	9.95659	30.8675		0.97672	4.32484	0.956769	2.72059	2.24473	0.807258
2022/11/01 09:26:06	2022/11/20 09:28:25	40.0277	19.8575	10.9764	16.478		6.51549	2.90895	1.71202	2.23683	3.34332	1.08539		18.9571	9.09426	14.743	11.2426		1.79932	1.06981	0.97539	0.55171	1.09906	0.259182		20.8459	23.9883	41.7304	14.3354		2.63827	4.06324	6.02401	2.14855	3.71852	0.869188		22.6198	29.6863	9.95659	30.8675		0.97672	4.32484	0.956769	2.72059	2.24473	0.807258
2022/11/01 09:31:06	2022/11/20 09:33:25	40.0277	19.8575	10.9764	16.478		6.51549	2.90895	1.71202	2.23683	3.34332	1.08539		18.9571	9.09426	14.743	11.2426		1.79932	1.06981	0.97539	0.55171	1.09906	0.259182		20.8459	23.9883	41.7315	14.3354		2.63827	4.06324	6.02512	2.14855	3.7188	0.869434		22.6198	29.6863	9.95659	30.8675		0.97672	4.32484	0.956769	2.72059	2.24473	0.807258
2022/11/01 09:36:06	2022/11/20 09:38:25	40.0277	19.8575	10.9764	16.478		6.51549	2.90895	1.71202	2.23683	3.34332	1.08539		18.9571	9.09426	14.743	11.2426		1.79932	1.06981	0.97539	0.55171	1.09906	0.259182		20.8459	23.9883	41.7724	14.3354		2.63827	4.06324	6.06596	2.14855	3.72901	0.878475		22.6198	29.6863	9.95659	30.8675		0.97672	4.32484	0.956769	2.72059	2.24473	0.807258
2022/11/01 09:41:06	2022/11/20 09:43:25	40.0277	19.8575	10.9764	16.478		6.51549	2.90895	1.71202	2.23683	3.34332	1.08539		18.9571	9.09426	14.7497	11.2426		1.79932	1.06981	0.98206	0.55171	1.10072	0.258922		20.8459	23.9883	41.833	14.3354		2.63827	4.06324	6.12662	2.14855	3.74417	0.89195		22.6198	29.6863	9.95659	30.8675		0.97672	4.32484	0.956769	2.72059	2.24473	0.807258
2022/11/01 09:46:06	2022/11/20 09:48:25	0	0	10.9764	16.478		6.51549	2.90895	1.71202	2.23683	3.34332	1.08539		0	0	14.7864	11.2426		1.79932	1.06981	1.01876	0.55171	1.1099	0.25768		0	0	41.8683	14.3354		2.63827	4.06324	6.16188	2.14855	3.75299	0.899807		0	0	9.95659	30.8675		0.97672	4.32484	0.956769	2.72059	2.24473	0.807258
2022/11/01 09:51:06	2022/11/20 09:53:25	0	0	10.9764	16.478		6.51549	2.90895	1.71202	2.23683	3.34332	1.08539		0	0	14.8155	11.2426		1.79932	1.06981	1.0479	0.55171	1.11718	0.256923		0	0	41.8685	14.3354		2.63827	4.06324	6.1621	2.14855	3.75304	0.899856		0	0	9.95659	30.8675		0.97672	4.32484	0.956769	2.72059	2.24473	0.807258
2022/11/01 09:56:06	2022/11/20 09:58:25	0	0	10.9764	16.478		6.51549	2.90895	1.71202	2.23683	3.34332	1.08539		0	0	14.8168	11.2426		1.79932	1.06981	1.04921	0.55171	1.11751	0.256894		0	0	41.8685	14.3354		2.63827	4.06324	6.1621	2.14855	3.75304	0.899856		0	0	9.95659	30.8675		0.97672	4.32484	0.956769	2.72059	2.24473	0.807258
2022/11/01 10:01:06	2022/11/20 10:03:25	0	0	10.9764	16.478		6.51549	2.90895	1.71202	2.23683	3.34332	1.08539		0	0	14.8168	11.2426		1.79932	1.06981	1.04921	0.55171	1.11751	0.256894		0	0	41.8685	14.3354		2.63827	4.06324	6.1621	2.14855	3.75304	0.899856		0	0	9.95659	30.8675		0.97672	4.32484	0.956769	2.72059	2.24473	0.807258
2022/11/01 10:06:06	2022/11/20 10:08:25	0	0.0217703	10.9764	16.478		6.51549	2.93072	1.71202	2.23683	3.34876	1.08468		0	0	14.8168	11.2426		1.79932	1.06981	1.04921	0.55171	1.11751	0.256894		0	0	41.8685	14.3354		2.63827	4.06324	6.1621	2.14855	3.75304	0.899856		0	0	9.95659	30.8675		0.97672	4.32484	0.956769	2.72059	2.24473	0.807258
2022/11/01 10:11:06	2022/11/20 10:13:25	0	0.0236206	10.9764	16.478		6.51549	2.93257	1.71202	2.23683	3.34923	1.08462		0	0	14.8168	11.2426		1.79932	1.06981	1.04921	0.55171	1.11751	0.256894		0	0	41.8685	14.3354		2.63827	4.06324	6.1621	2.14855	3.75304	0.899856		0	0	9.95659	30.8675		0.97672	4.32484	0.956769	2.72059	2.24473	0.807258
2022/11/01 10:16:06	2022/11/20 10:18:25	0	0.0236206	10.9764	16.478		6.51549	2.93257	1.71202	2.23683	3.34923	1.08462		0	0	14.8168	11.2426		1.79932	1.06981	1.04921	0.55171	1.11751	0.256894		0	0	41.8685	14.3354		2.63827	4.06324	6.1621	2.14855	3.75304	0.899856		0	0	9.95659	30.8675		0.97672	4.32484	0.956769	2.72059	2.24473	0.807258
2022/11/01 10:21:06	2022/11/20 10:23:25	0	0.0236206	10.9764	16.478		6.51549	2.93257	1.71202	2.23683	3.34923	1.08462		0	0	14.8168	11.2426		1.79932	1.06981	1.04921	0.55171	1.11751	0.256894		0	0	41.8685	14.3354		2.63827	4.06324	6.1621	2.14855	3.75304	0.899856		0	0	9.95659	30.8675		0.97672	4.32484	0.956769	2.72059	2.24473	0.807258
2022/11/01 10:26:06	2022/11/20 10:28:25	0	0.0236206	10.9764	16.478		6.51549	2.93257	1.71202	2.23683	3.34923	1.08462		0	0	14.8168	11.2426		1.79932	1.06981	1.04921	0.55171	1.11751	0.256894		0	0	41.8685	14.3354		2.63827	4.06324	6.1621	2.14855	3.75304	0.899856		0	0	9.95659	30.8675		0.97672	4.32484	0.956769	2.72059	2.24473	0.807258
2022/11/01 10:31:06	2022/11/20 10:33:25	0	0.0236206	10.9764	16.478		6.51549	2.93257	1.71202	2.23683	3.34923	1.08462		0	0	14.8168	11.2426		1.79932	1.06981	1.04921	0.55171	1.11751	0.256894		0	0	41.8685	14.3354		2.63827	4.06324	6.1621	2.14855	3.75304	0.899856		0	0	9.95659	30.8675		0.97672	4.32484	0.956769	2.72059	2.24473	0.807258
2022/11/01 10:36:06	2022/11/20 10:38:25	0	0.0236206	10.9764	16.478		6.51549	2.93257	1.71202	2.23683	3.34923	1.08462		8.47001e-08	0	14.8168	11.2426		1.79932	1.06981	1.04921	0.55171	1.11751	0.256894		0	0.00971069	41.8685	14.3354		2.63827	4.07295	6.1621	2.14855	3.75547	0.900138		0	0.00667135	9.95659	30.8675		0.97672	4.33151	0.956769	2.72059	2.2464	0.808691
2022/11/01 10:41:06	2022/11/20 10:43:25	0	0.0236206	10.9764	16.478		6.51549	2.93257	1.71202	2.23683	3.34923	1.08462		0.0036842	0	14.8168	11.2426		1.803	1.06981	1.04921	0.55171	1.11843	0.257709		0	0.045166	41.8685	14.3354		2.63827	4.10841	6.1621	2.14855	3.76433	0.901223		0	0.0147705	9.95659	30.8675		0.97672	4.33961	0.956769	2.72059	2.24842	0.810432
2022/11/01 10:46:06	2022/11/20 10:48:25	0	0.0236206	10.9764	16.478		6.51549	2.93257	1.71202	2.23683	3.34923	1.08462		0.00607301	0	14.8168	11.2426		1.80539	1.06981	1.04921	0.55171	1.11903	0.258238		0	0.045166	41.8685	14.3354		2.63827	4.10841	6.1621	2.14855	3.76433	0.901223		0	0.0147705	9.95659	30.8675		0.97672	4.33961	0.956769	2.72059	2.24842	0.810432
2022/11/01 10:51:06	2022/11/20 10:53:25	0	0.0236206	10.9764	16.478		6.51549	2.93257	1.71202	2.23683	3.34923	1.08462		0.00607301	0	14.8168	11.2426		1.80539	1.06981	1.04921	0.55171	1.11903	0.258238		0	0.045166	41.8685	14.3354		2.63827	4.10841	6.1621	2.14855	3.76433	0.901223		0	0.0147705	9.95659	30.8675		0.97672	4.33961	0.956769	2.72059	2.24842	0.810432
2022/11/01 10:56:06	2022/11/20 10:58:25	0	0.0236206	10.9764	16.478		6.51549	2.93257	1.71202	2.23683	3.34923	1.08462		0.00607301	0	14.8168	11.2426		1.80539	1.06981	1.04921	0.55171	1.11903	0.258238		0	0.045166	41.8685	14.3354		2.63827	4.10841	6.1621	2.14855	3.76433	0.901223		0	0.0147705	9.95659	30.8675		0.97672	4.33961	0.956769	2.72059	2.24842	0.810432
2022/11/01 11:01:06	2022/11/20 11:03:25	0	0.0236206	10.9764	16.478		6.51549	2.93257	1.71202	2.23683	3.34923	1.08462		0.00607301	0	14.8168	11.2426		1.80539	1.06981	1.04921	0.55171	1.11903	0.258238		0	0.045166	41.8685	14.3354		2.63827	4.10841	6.1621	2.14855	3.76433	0.901223		0	0.0147705	9.95659	30.8675		0.97672	4.33961	0.956769	2.72059	2.24842	0.810432
2022/11/01 11:06:06	2022/11/20 11:08:25	0	0.0236206	10.9764	16.478		6.51549	2.93257	1.71202	2.23683	3.34923	1.08462		0.00607301	0	14.8168	11.2426		1.80539	1.06981	1.04921	0.55171	1.11903	0.258238		0	0.045166	41.8685	14.3354		2.63827	4.10841	6.1621	2.14855	3.76433	0.901223		0	0.0147705	9.95659	30.8675		0.97672	4.33961	0.956769	2.72059	2.24842	0.810432
2022/11/01 11:11:06	2022/11/20 11:13:25	0	0.0236206	10.9764	16.478		6.51549	2.93257	1.71202	2.23683	3.34923	1.08462		0.00607301	0	14.8168	11.2426		1.80539	1.06981	1.04921	0.55171	1.11903	0.258238		0	0.045166	41.8685	14.3354		2.63827	4.10841	6.1621	2.14855	3.76433	0.901223		0	0.0147705	9.95659	30.8675		0.97672	4.33961	0.956769	2.72059	2.24842	0.810432
2022/11/01 11:16:06	2022/11/20 11:18:25	0	0.0236206	10.9764	16.478		6.51549	2.93257	1.71202	2.23683	3.34923	1.08462		0.00607301	0	14.8168	11.2426		1.80539	1.06981	1.04921	0.55171	1.11903	0.258238		0	0.0554668	41.8685	14.3354		2.63827	4.11871	6.1621	2.14855	3.76691	0.901555		0	0.0147705	9.95659	30.8675		0.97672	4.33961	0.956769	2.72059	2.24842	0.810432
2022/11/01 11:21:06	2022/11/20 11:23:25	0	0.0236206	10.9764	16.478		6.51549	2.93257	1.71202	2.23683	3.34923	1.08462		0.00607301	0	14.8168	11.2426		1.80539	1.06981	1.04921	0.55171	1.11903	0.258238		0	0.0622864	41.8685	14.3354		2.63827	4.12553	6.1621	2.14855	3.76861	0.901778		0	0.0437207	9.95659	30.8675		0.97672	4.36856	0.956769	2.72059	2.25566	0.816666
2022/11/01 11:26:06	2022/11/20 11:28:25	0	0.0236206	10.9764	16.478		6.51549	2.93257	1.71202	2.23683	3.34923	1.08462		0.00607301	0	14.8168	11.2426		1.80539	1.06981	1.04921	0.55171	1.11903	0.258238		0	0.0622864	41.8685	14.3354		2.63827	4.12553	6.1621	2.14855	3.76861	0.901778		0	0.0500634	9.95659	30.8675		0.97672	4.3749	0.956769	2.72059	2.25725	0.818034
2022/11/01 11:31:06	2022/11/20 11:33:25	0	0.0236206	10.9764	16.478		6.51549	2.93257	1.71202	2.23683	3.34923	1.08462		0.00607301	0	14.8168	11.2426		1.80539	1.06981	1.04921	0.55171	1.11903	0.258238		0	0.0622864	41.8685	14.3354		2.63827	4.12553	6.1621	2.14855	3.76861	0.901778		0	0.0892312	9.95659	30.8675		0.97672	4.41407	0.956769	2.72059	2.26704	0.826498
2022/11/01 11:36:06	2022/11/20 11:38:25	0	0.0236206	10.9764	16.478		6.51549	2.93257	1.71202	2.23683	3.34923	1.08462		0.00607301	0	14.8168	11.2426		1.80539	1.06981	1.04921	0.55171	1.11903	0.258238		0	0.0622864	41.8685	14.3354		2.63827	4.12553	6.1621	2.14855	3.76861	0.901778		0	0.138821	9.95659	30.8675		0.97672	4.46366	0.956769	2.72059	2.27943	0.837256
2022/11/01 11:41:06	2022/11/20 11:43:25	0	0.0236206	10.9764	16.478		6.51549	2.93257	1.71202	2.23683	3.34923	1.08462		0.00607301	0	14.8168	11.2426		1.80539	1.06981	1.04921	0.55171	1.11903	0.258238		0	0.0622864	41.8949	14.3354		2.63827	4.12553	6.18847	2.14855	3.7752	0.907616		0	0.185628	9.95659	30.8783		0.97672	4.51047	0.956769	2.73136	2.29383	0.84791
2022/11/01 11:46:06	2022/11/20 11:48:25	0	0.0236206	10.9764	16.478		6.51549	2.93257	1.71202	2.23683	3.34923	1.08462		0.00607301	0	14.8168	11.2426		1.80539	1.06981	1.04921	0.55171	1.11903	0.258238		0	0.0622864	42.0204	14.3354		2.63827	4.12553	6.31402	2.14855	3.80659	0.935548		0	0.196593	9.95659	30.9268		0.97672	4.52143	0.956769	2.77987	2.3087	0.852451
2022/11/01 11:51:06	2022/11/20 11:53:25	0	0.0236206	10.9764	16.478		6.51549	2.93257	1.71202	2.23683	3.34923	1.08462		0.00607301	0	14.8168	11.2426		1.80539	1.06981	1.04921	0.55171	1.11903	0.258238		0	0.0622864	42.1354	14.3354		2.63827	4.12553	6.429	2.14855	3.83534	0.961315		0	0.196593	9.95659	30.9348		0.97672	4.52143	0.956769	2.78789	2.3107	0.852823
2022/11/01 11:56:06	2022/11/20 11:58:25	0	0.0247988	10.9764	16.478		6.51549	2.93375	1.71202	2.23683	3.34952	1.08458		0.00607301	0	14.8168	11.2426		1.80539	1.06981	1.04921	0.55171	1.11903	0.258238		0	0.0622864	42.1494	14.3354		2.63827	4.12553	6.44298	2.14855	3.83883	0.964459		0	0.196593	9.95659	30.9664		0.97672	4.52143	0.956769	2.81953	2.31861	0.854333
2022/11/01 12:01:06	2022/11/20 12:03:25	0	0.0865292	10.9764	16.478		6.51549	2.99548	1.71202	2.23683	3.36495	1.08271		0.00607301	0	14.8168	11.2426		1.80539	1.06981	1.04921	0.55171	1.11903	0.258238		0	0.0622864	42.1494	14.3354		2.63827	4.12553	6.44298	2.14855	3.83883	0.964459		0	0.196593	9.95659	30.9938		0.97672	4.52143	0.956769	2.84684	2.32544	0.855694
2022/11/01 12:06:06	2022/11/20 12:08:25	0	0.0999144	10.9764	16.478		6.51549	3.00886	1.71202	2.23683	3.3683	1.08234		0.00607301	0	14.8168	11.2426		1.80539	1.06981	1.04921	0.55171	1.11903	0.258238		0	0.0622864	42.1494	14.3354		2.63827	4.12553	6.44298	2.14855	3.83883	0.964459		0	0.196593	9.95659	30.9965		0.97672	4.52143	0.956769	2.84957	2.32612	0.855833
2022/11/01 12:11:06	2022/11/20 12:13:25	0	0.0999144	10.9764	16.478		6.51549	3.00886	1.71202	2.23683	3.3683	1.08234		0.00607301	0	14.8168	11.2426		1.80539	1.06981	1.04921	0.55171	1.11903	0.258238		0	0.0759978	42.1494	14.3354		2.63827	4.13924	6.44298	2.14855	3.84226	0.964805		0	0.196593	9.95659	30.9965		0.97672	4.52143	0.956769	2.84957	2.32612	0.855833
2022/11/01 12:16:06	2022/11/20 12:18:25	0.00466324	0.0999144	10.9764	16.478		6.52015	3.00886	1.71202	2.23683	3.36947	1.08347		0.00607301	0	14.8168	11.2426		1.80539	1.06981	1.04921	0.55171	1.11903	0.258238		0	0.173646	42.1494	14.3354		2.63827	4.23689	6.44298	2.14855	3.86667	0.967615		0.00596334	0.196593	9.95659	30.9965		0.982683	4.52143	0.956769	2.84957	2.32761	0.85505
2022/11/01 12:21:06	2022/11/20 12:23:25	0.0889906	0.0999144	10.9764	16.478		6.60448	3.00886	1.71202	2.23683	3.39055	1.10392		0.038538	0.0157635	14.8168	11.2426		1.83786	1.08557	1.04921	0.55171	1.13109	0.265201		0.0812731	0.248092	42.1494	14.3354		2.71954	4.31133	6.44298	2.14855	3.9056	0.961634		0.124126	0.196593	9.95659	30.9965		1.10085	4.52143	0.956769	2.84957	2.35715	0.839939
2022/11/01 12:26:06	2022/11/20 12:28:25	0.0913696	0.0999144	10.9764	16.478		6.60686	3.00886	1.71202	2.23683	3.39114	1.10449		0.0465698	0.0545617	14.8168	11.2426		1.84589	1.12437	1.04921	0.55171	1.14279	0.266587		0.109439	0.249938	42.1494	14.3354		2.74771	4.31318	6.44298	2.14855	3.9131	0.958824		0.136815	0.196593	9.95659	30.9965		1.11354	4.52143	0.956769	2.84957	2.36033	0.838362
2022/11/01 12:31:06	2022/11/20 12:33:25	0.0913696	0.0999144	10.9764	16.478		6.60686	3.00886	1.71202	2.23683	3.39114	1.10449		0.0465698	0.0603445	14.8168	11.2426		1.84589	1.13015	1.04921	0.55171	1.14424	0.266557		0.112584	0.249938	42.1494	14.3354		2.75085	4.31318	6.44298	2.14855	3.91389	0.958506		0.137817	0.196593	9.95659	30.9965		1.11454	4.52143	0.956769	2.84957	2.36058	0.838237
2022/11/01 12:36:06	2022/11/20 12:38:25	0.0913696	0.0999144	10.9764	16.478		6.60686	3.00886	1.71202	2.23683	3.39114	1.10449		0.0465698	0.0617369	14.8168	11.2426		1.84589	1.13154	1.04921	0.55171	1.14459	0.266551		0.119668	0.249938	42.1494	14.3354		2.75794	4.31318	6.44298	2.14855	3.91566	0.957791		0.137817	0.206369	9.95659	30.9965		1.11454	4.53121	0.956769	2.84957	2.36302	0.840339
2022/11/01 12:41:06	2022/11/20 12:43:25	0.0913696	0.0999144	10.9764	16.478		6.60686	3.00886	1.71202	2.23683	3.39114	1.10449		0.0465698	0.0617369	14.8168	11.2426		1.84589	1.13154	1.04921	0.55171	1.14459	0.266551		0.119751	0.249938	42.1494	14.3354		2.75802	4.31318	6.44298	2.14855	3.91568	0.957783		0.137817	0.219807	9.95659	30.9965		1.11454	4.54465	0.956769	2.84957	2.36638	0.84323
2022/11/01 12:46:06	2022/11/20 12:48:25	0.0913696	0.0999144	10.9764	16.478		6.60686	3.00886	1.71202	2.23683	3.39114	1.10449		0.0465698	0.0617369	14.8258	11.2426		1.84589	1.13154	1.0582	0.55171	1.14684	0.266293		0.119751	0.249938	42.1494	14.3354		2.75802	4.31318	6.44298	2.14855	3.91568	0.957783		0.137817	0.23661	9.95659	30.9965		1.11454	4.56145	0.956769	2.84957	2.37058	0.84685
2022/11/01 12:51:06	2022/11/20 12:53:25	0.0916248	0.0999144	10.9764	16.478		6.60711	3.00886	1.71202	2.23683	3.39121	1.10456		0.0465698	0.0617369	14.8471	11.2426		1.84589	1.13154	1.07953	0.55171	1.15217	0.265754		0.119751	0.249938	42.1494	14.3354		2.75802	4.31318	6.44298	2.14855	3.91568	0.957783		0.137817	0.256086	9.95659	30.9965		1.11454	4.58093	0.956769	2.84957	2.37545	0.851052
2022/11/01 12:56:06	2022/11/20 12:58:25	0.171332	0.0999144	10.9764	16.478		6.68682	3.00886	1.71202	2.23683	3.41113	1.1239		0.0465698	0.0617369	14.8474	11.2482		1.84589	1.13154	1.07984	0.5573	1.15364	0.264696		0.119751	0.249938	42.1494	14.3354		2.75802	4.31318	6.44298	2.14855	3.91568	0.957783		0.137817	0.258696	9.95659	30.9965		1.11454	4.58354	0.956769	2.84957	2.3761	0.851615
2022/11/01 13:01:06	2022/11/20 13:03:25	0.196972	0.0999144	10.9764	16.478		6.71246	3.00886	1.71202	2.23683	3.41754	1.13013		0.0465698	0.0617369	14.8474	11.2489		1.84589	1.13154	1.07984	0.55802	1.15382	0.264561		0.119751	0.249938	42.1494	14.3354		2.75802	4.31318	6.44298	2.14855	3.91568	0.957783		0.137817	0.258696	9.95659	30.9965		1.11454	4.58354	0.956769	2.84957	2.3761	0.851615
2022/11/01 13:06:06	2022/11/20 13:08:25	0.200959	0.0999144	10.9764	16.478		6.71645	3.00886	1.71202	2.23683	3.41854	1.1311		0.0465698	0.0617369	14.8474	11.2489		1.84589	1.13154	1.07984	0.55802	1.15382	0.264561		0.119751	0.249938	42.1494	14.3354		2.75802	4.31318	6.44298	2.14855	3.91568	0.957783		0.137817	0.258696	9.95659	30.9965		1.11454	4.58354	0.956769	2.84957	2.3761	0.851615
2022/11/01 13:11:06	2022/11/20 13:13:25	0.200959	0.0999144	10.9764	16.478		6.71645	3.00886	1.71202	2.23683	3.41854	1.1311		0.0465698	0.0617369	14.8474	11.2489		1.84589	1.13154	1.07984	0.55802	1.15382	0.264561		0.119751	0.249938	42.1494	14.3354		2.75802	4.31318	6.44298	2.14855	3.91568	0.957783		0.137817	0.258696	9.95659	30.9965		1.11454	4.58354	0.956769	2.84957	2.3761	0.851615
2022/11/01 13:16:06	2022/11/20 13:18:25	0.200959	0.0999144	10.9764	16.478		6.71645	3.00886	1.71202	2.23683	3.41854	1.1311		0.101941	0.0619294	14.8474	11.2489		1.90126	1.13174	1.07984	0.55802	1.16771	0.276712		0.119751	0.249938	42.1494	14.3354		2.75802	4.31318	6.44298	2.14855	3.91568	0.957783		0.137817	0.258696	9.95659	30.9965		1.11454	4.58354	0.956769	2.84957	2.3761	0.851615
2022/11/01 13:21:06	2022/11/20 13:23:25	0.200959	0.0999144	10.9764	16.478		6.71645	3.00886	1.71202	2.23683	3.41854	1.1311		0.265452	0.0930605	14.8474	11.2489		2.06477	1.16287	1.07984	0.55802	1.21637	0.312878		0.119751	0.249938	42.1494	14.3354		2.75802	4.31318	6.44298	2.14855	3.91568	0.957783		0.137817	0.258696	9.95659	30.9965		1.11454	4.58354	0.956769	2.84957	2.3761	0.851615
2022/11/01 13:26:06	2022/11/20 13:28:25	0.200959	0.0999144	10.9764	16.478		6.71645	3.00886	1.71202	2.23683	3.41854	1.1311		0.273225	0.102142	14.8474	11.2489		2.07255	1.17195	1.07984	0.55802	1.22059	0.314511		0.119751	0.249938	42.1494	14.3354		2.75802	4.31318	6.44298	2.14855	3.91568	0.957783		0.137817	0.258696	9.95659	30.9965		1.11454	4.58354	0.956769	2.84957	2.3761	0.851615
2022/11/01 13:31:06	2022/11/20 13:33:25	0.200959	0.0999144	10.9764	16.478		6.71645	3.00886	1.71202	2.23683	3.41854	1.1311		0.273225	0.102142	14.8474	11.2489		2.07255	1.17195	1.07984	0.55802	1.22059	0.314511		0.119751	0.249938	42.1494	14.3354		2.75802	4.31318	6.44298	2.14855	3.91568	0.957783		0.137817	0.258696	9.95659	31.0183		1.11454	4.58354	0.956769	2.87137	2.38155	0.852642
2022/11/01 13:36:06	2022/11/20 13:38:25	0.200959	0.0999144	10.9764	16.478		6.71645	3.00886	1.71202	2.23683	3.41854	1.1311		0.273225	0.102142	14.8474	11.2489		2.07255	1.17195	1.07984	0.55802	1.22059	0.314511		0.119751	0.249938	42.1494	14.3354		2.75802	4.31318	6.44298	2.14855	3.91568	0.957783		0.137817	0.258696	9.95659	31.1211		1.11454	4.58354	0.956769	2.97417	2.40725	0.857934
2022/11/01 13:41:06	2022/11/20 13:43:25	0.200959	0.0999144	10.9764	16.478		6.71645	3.00886	1.71202	2.23683	3.41854	1.1311		0.273225	0.102142	14.8474	11.2489		2.07255	1.17195	1.07984	0.55802	1.22059	0.314511		0.119751	0.249938	42.1494	14.3354		2.75802	4.31318	6.44298	2.14855	3.91568	0.957783		0.137817	0.258696	9.95659	31.2296		1.11454	4.58354	0.956769	3.08272	2.43439	0.864317
2022/11/01 13:46:06	2022/11/20 13:48:25	0.200959	0.0999144	10.9764	16.478		6.71645	3.00886	1.71202	2.23683	3.41854	1.1311		0.273225	0.102142	14.8474	11.2489		2.07255	1.17195	1.07984	0.55802	1.22059	0.314511		0.119751	0.249938	42.1494	14.3354		2.75802	4.31318	6.44298	2.14855	3.91568	0.957783		0.137817	0.258696	9.95659	31.2699		1.11454	4.58354	0.956769	3.12293	2.44444	0.866885
2022/11/01 13:51:06	2022/11/20 13:53:25	0.200959	0.0999144	10.9764	16.478		6.71645	3.00886	1.71202	2.23683	3.41854	1.1311		0.273225	0.102142	14.8474	11.2489		2.07255	1.17195	1.07984	0.55802	1.22059	0.314511		0.119751	0.249938	42.1494	14.3354		2.75802	4.31318	6.44298	2.14855	3.91568	0.957783		0.137817	0.258696	9.95659	31.2859		1.11454	4.58354	0.956769	3.139	2.44846	0.867942
2022/11/01 13:56:06	2022/11/20 13:58:25	0.200959	0.0999144	10.9764	16.478		6.71645	3.00886	1.71202	2.23683	3.41854	1.1311		0.273225	0.102142	14.8474	11.2489		2.07255	1.17195	1.07984	0.55802	1.22059	0.314511		0.119751	0.249938	42.1494	14.3354		2.75802	4.31318	6.44298	2.14855	3.91568	0.957783		0.137817	0.258696	9.95659	31.297		1.11454	4.58354	0.956769	3.15008	2.45123	0.868681
2022/11/01 14:01:06	2022/11/20 14:03:25	0.200959	0.0999144	10.9764	16.478		6.71645	3.00886	1.71202	2.23683	3.41854	1.1311		0.273225	0.102142	14.8474	11.2489		2.07255	1.17195	1.07984	0.55802	1.22059	0.314511		0.119751	0.249938	42.1494	14.3354		2.75802	4.31318	6.44298	2.14855	3.91568	0.957783		0.137817	0.258696	9.95659	31.2972		1.11454	4.58354	0.956769	3.1503	2.45129	0.868696
2022/11/01 14:06:06	2022/11/20 14:08:25	0.200959	0.0999144	10.9764	16.478		6.71645	3.00886	1.71202	2.23683	3.41854	1.1311		0.273225	0.102142	14.8474	11.2489		2.07255	1.17195	1.07984	0.55802	1.22059	0.314511		0.119751	0.249938	42.1494	14.3354		2.75802	4.31318	6.44298	2.14855	3.91568	0.957783		0.137817	0.258696	9.95659	31.2972		1.11454	4.58354	0.956769	3.1503	2.45129	0.868696
2022/11/01 14:11:06	2022/11/20 14:13:25	0.200959	0.0999144	10.9764	16.478		6.71645	3.00886	1.71202	2.23683	3.41854	1.1311		0.273225	0.102142	14.8474	11.2489		2.07255	1.17195	1.07984	0.55802	1.22059	0.314511		0.119751	0.249938	42.1494	14.3354		2.75802	4.31318	6.44298	2.14855	3.91568	0.957783		0.137817	0.258696	9.95659	31.2972		1.11454	4.58354	0.956769	3.1503	2.45129	0.868696
2022/11/01 14:16:06	2022/11/20 14:18:25	0.200959	0.0999144	10.9764	16.478		6.71645	3.00886	1.71202	2.23683	3.41854	1.1311		0.273225	0.102142	14.8474	11.2489		2.07255	1.17195	1.07984	0.55802	1.22059	0.314511		0.119751	0.249938	42.1494	14.3354		2.75802	4.31318	6.44298	2.14855	3.91568	0.957783		0.137817	0.258696	9.95659	31.2972		1.11454	4.58354	0.956769	3.1503	2.45129	0.868696
2022/11/01 14:21:06	2022/11/20 14:23:25	0.200959	0.0999144	10.9764	16.478		6.71645	3.00886	1.71202	2.23683	3.41854	1.1311		0.273225	0.102142	14.8495	11.2505		2.07255	1.17195	1.08188	0.55955	1.22148	0.314166		0.119751	0.249938	42.1603	14.3357		2.75802	4.31318	6.45387	2.14884	3.91848	0.960134		0.137817	0.258696	9.95659	31.2972		1.11454	4.58354	0.956769	3.1503	2.45129	0.868696
2022/11/01 14:26:06	2022/11/20 14:28:25	0.200959	0.0999144	10.9928	16.4832		6.71645	3.00886	1.72834	2.24198	3.42391	1.12861		0.273225	0.102142	14.8676	11.2932		2.07255	1.17195	1.09997	0.60229	1.23669	0.30605		0.119751	0.249938	42.2605	14.3439		2.75802	4.31318	6.55411	2.157	3.94558	0.981023		0.137817	0.258696	10.0171	31.3183		1.11454	4.58354	1.0173	3.17135	2.47168	0.861517
2022/11/01 14:31:06	2022/11/20 14:33:25	0.200959	0.0999144	11.0007	16.5017		6.71645	3.00886	1.73632	2.26052	3.43054	1.12599		0.273225	0.102142	14.8715	11.2952		2.07255	1.17195	1.1039	0.60428	1.23817	0.305561		0.119751	0.249938	42.3089	14.3443		2.75802	4.31318	6.60244	2.15743	3.95777	0.991683		0.137817	0.258696	10.0497	31.4538		1.11454	4.58354	1.04986	3.3069	2.51371	0.866693
2022/11/01 14:36:06	2022/11/20 14:38:25	0.200959	0.0999144	11.0007	16.5019		6.71645	3.00886	1.73632	2.26073	3.43059	1.12598		0.273225	0.102142	14.8715	11.2952		2.07255	1.17195	1.1039	0.60428	1.23817	0.305561		0.119751	0.249938	42.3628	14.3443		2.75802	4.31318	6.65636	2.15743	3.97125	1.00368		0.137817	0.258696	10.0723	31.5889		1.11454	4.58354	1.07249	3.44195	2.55313	0.874376
2022/11/01 14:41:06	2022/11/20 14:43:25	0.200959	0.0999144	11.0007	16.5019		6.71645	3.00886	1.73632	2.26073	3.43059	1.12598		0.273225	0.102142	14.8715	11.2952		2.07255	1.17195	1.1039	0.60428	1.23817	0.305561		0.119751	0.249938	42.3639	14.3443		2.75802	4.31318	6.65745	2.15743	3.97152	1.00393		0.137817	0.258696	10.0875	31.6094		1.11454	4.58354	1.08766	3.46247	2.56205	0.873989
2022/11/01 14:46:06	2022/11/20 14:48:25	0.200959	0.127556	11.0007	16.5019		6.71645	3.03651	1.73632	2.26073	3.4375	1.12513		0.273225	0.102142	14.8715	11.2952		2.07255	1.17195	1.1039	0.60428	1.23817	0.305561		0.119751	0.249938	42.3639	14.3443		2.75802	4.31318	6.65745	2.15743	3.97152	1.00393		0.137817	0.258696	10.0875	31.6094		1.11454	4.58354	1.08766	3.46247	2.56205	0.873989
2022/11/01 14:51:06	2022/11/20 14:53:25	0.200959	0.173536	11.0007	16.5019		6.71645	3.08249	1.73632	2.26073	3.449	1.12383		0.273225	0.102142	14.8715	11.2952		2.07255	1.17195	1.1039	0.60428	1.23817	0.305561		0.119751	0.249938	42.3639	14.3443		2.75802	4.31318	6.65745	2.15743	3.97152	1.00393		0.137817	0.258696	10.0875	31.6094		1.11454	4.58354	1.08766	3.46247	2.56205	0.873989
2022/11/01 14:56:06	2022/11/20 14:58:25	0.200959	0.173919	11.0007	16.5019		6.71645	3.08287	1.73632	2.26073	3.44909	1.12382		0.273225	0.102142	14.8715	11.2952		2.07255	1.17195	1.1039	0.60428	1.23817	0.305561		0.119751	0.249938	42.3639	14.3443		2.75802	4.31318	6.65745	2.15743	3.97152	1.00393		0.137817	0.258696	10.0875	31.6094		1.11454	4.58354	1.08766	3.46247	2.56205	0.873989
2022/11/01 15:01:06	2022/11/20 15:03:25	0.200959	0.173919	11.0007	16.5019		6.71645	3.08287	1.73632	2.26073	3.44909	1.12382		0.273225	0.102142	14.8715	11.2952		2.07255	1.17195	1.1039	0.60428	1.23817	0.305561		0.119751	0.249938	42.3639	14.3443		2.75802	4.31318	6.65745	2.15743	3.97152	1.00393		0.137817	0.258696	10.0875	31.6094		1.11454	4.58354	1.08766	3.46247	2.56205	0.873989
2022/11/01 15:06:06	2022/11/20 15:08:25	0.200959	0.173919	11.0007	16.5019		6.71645	3.08287	1.73632	2.26073	3.44909	1.12382		0.273225	0.102142	14.8715	11.2952		2.07255	1.17195	1.1039	0.60428	1.23817	0.305561		0.119751	0.249938	42.3639	14.3443		2.75802	4.31318	6.65745	2.15743	3.97152	1.00393		0.137817	0.258696	10.0875	31.6094		1.11454	4.58354	1.08766	3.46247	2.56205	0.873989
2022/11/01 15:11:06	2022/11/20 15:13:25	0.200959	0.173919	11.0007	16.5019		6.71645	3.08287	1.73632	2.26073	3.44909	1.12382		0.273225	0.102142	14.8715	11.2952		2.07255	1.17195	1.1039	0.60428	1.23817	0.305561		0.119751	0.249938	42.3639	14.3443		2.75802	4.31318	6.65745	2.15743	3.97152	1.00393		0.137817	0.258696	10.0875	31.6094		1.11454	4.58354	1.08766	3.46247	2.56205	0.873989
2022/11/01 15:16:06	2022/11/20 15:18:25	0.200959	0.173919	11.0007	16.5019		6.71645	3.08287	1.73632	2.26073	3.44909	1.12382		0.273225	0.102142	14.8715	11.2952		2.07255	1.17195	1.1039	0.60428	1.23817	0.305561		0.119751	0.249938	42.3639	14.3443		2.75802	4.31318	6.65745	2.15743	3.97152	1.00393		0.137817	0.258696	10.0875	31.6094		1.11454	4.58354	1.08766	3.46247	2.56205	0.873989
2022/11/01 15:21:06	2022/11/20 15:23:25	0.200959	0.173919	11.0007	16.5019		6.71645	3.08287	1.73632	2.26073	3.44909	1.12382		0.273225	0.102142	14.8715	11.2952		2.07255	1.17195	1.1039	0.60428	1.23817	0.305561		0.119751	0.249938	42.3639	14.3443		2.75802	4.31318	6.65745	2.15743	3.97152	1.00393		0.137817	0.261417	10.0875	31.6094		1.11454	4.58626	1.08766	3.46247	2.56273	0.874514
2022/11/01 15:26:06	2022/11/20 15:28:25	0.200959	0.173919	11.0007	16.5019		6.71645	3.08287	1.73632	2.26073	3.44909	1.12382		0.273758	0.102142	14.8715	11.2952		2.07308	1.17195	1.1039	0.60428	1.2383	0.305682		0.119751	0.249938	42.3639	14.3443		2.75802	4.31318	6.65745	2.15743	3.97152	1.00393		0.137817	0.281971	10.0875	31.6094		1.11454	4.60681	1.08766	3.46247	2.56787	0.878483
2022/11/01 15:31:06	2022/11/20 15:33:25	0.200959	0.173919	11.0007	16.5019		6.71645	3.08287	1.73632	2.26073	3.44909	1.12382		0.287584	0.102142	14.8715	11.2952		2.0869	1.17195	1.1039	0.60428	1.24176	0.308832		0.119751	0.249938	42.3639	14.3443		2.75802	4.31318	6.65745	2.15743	3.97152	1.00393		0.137817	0.302484	10.0875	31.6094		1.11454	4.62732	1.08766	3.46247	2.573	0.882457
2022/11/01 15:36:06	2022/11/20 15:38:25	0.200959	0.173919	11.0007	16.5019		6.71645	3.08287	1.73632	2.26073	3.44909	1.12382		0.290989	0.102142	14.8715	11.2952		2.09031	1.17195	1.1039	0.60428	1.24261	0.309609		0.119751	0.249938	42.3639	14.3443		2.75802	4.31318	6.65745	2.15743	3.97152	1.00393		0.137817	0.305168	10.0875	31.6094		1.11454	4.63001	1.08766	3.46247	2.57367	0.882977
2022/11/01 15:41:06	2022/11/20 15:43:25	0.200959	0.173919	11.0007	16.5019		6.71645	3.08287	1.73632	2.26073	3.44909	1.12382		0.290989	0.102142	14.8715	11.2952		2.09031	1.17195	1.1039	0.60428	1.24261	0.309609		0.119751	0.249938	42.3639	14.3443		2.75802	4.31318	6.65745	2.15743	3.97152	1.00393		0.1415	0.305168	10.0875	31.6094		1.11822	4.63001	1.08766	3.46247	2.57459	0.88247
2022/11/01 15:46:06	2022/11/20 15:48:25	0.200959	0.173919	11.0007	16.5019		6.71645	3.08287	1.73632	2.26073	3.44909	1.12382		0.290989	0.102142	14.8715	11.2952		2.09031	1.17195	1.1039	0.60428	1.24261	0.309609		0.119751	0.249938	42.3639	14.3443		2.75802	4.31318	6.65745	2.15743	3.97152	1.00393		0.177443	0.305168	10.0875	31.6094		1.15416	4.63001	1.08766	3.46247	2.58357	0.877559
2022/11/01 15:51:06	2022/11/20 15:53:25	0.200959	0.173919	11.0007	16.5019		6.71645	3.08287	1.73632	2.26073	3.44909	1.12382		0.290989	0.102142	14.8715	11.2952		2.09031	1.17195	1.1039	0.60428	1.24261	0.309609		0.119751	0.249938	42.3639	14.3443		2.75802	4.31318	6.65745	2.15743	3.97152	1.00393		0.220472	0.305168	10.0875	31.6094		1.19719	4.63001	1.08766	3.46247	2.59433	0.871766
2022/11/01 15:56:06	2022/11/20 15:58:25	0.200959	0.173919	11.0007	16.5019		6.71645	3.08287	1.73632	2.26073	3.44909	1.12382		0.290989	0.102142	14.8715	11.2952		2.09031	1.17195	1.1039	0.60428	1.24261	0.309609		0.119751	0.252052	42.3639	14.3443		2.75802	4.31529	6.65745	2.15743	3.97205	1.00399		0.236483	0.305168	10.0875	31.6094		1.2132	4.63001	1.08766	3.46247	2.59833	0.869634
2022/11/01 16:01:06	2022/11/20 16:03:25	0.200959	0.173919	11.0007	16.5019		6.71645	3.08287	1.73632	2.26073	3.44909	1.12382		0.290989	0.102142	14.8715	11.3174		2.09031	1.17195	1.1039	0.62649	1.24816	0.30582		0.119751	0.296521	42.3639	14.3443		2.75802	4.35976	6.65745	2.15743	3.98317	1.00532		0.236483	0.305168	10.0875	31.6094		1.2132	4.63001	1.08766	3.46247	2.59833	0.869634
2022/11/01 16:06:06	2022/11/20 16:08:25	0.200959	0.173919	11.0007	16.5019		6.71645	3.08287	1.73632	2.26073	3.44909	1.12382		0.290989	0.102142	14.8715	11.3692		2.09031	1.17195	1.1039	0.67828	1.26111	0.297199		0.119751	0.315568	42.3639	14.3443		2.75802	4.37881	6.65745	2.15743	3.98793	1.00592		0.236483	0.305168	10.0875	31.6094		1.2132	4.63001	1.08766	3.46247	2.59833	0.869634
2022/11/01 16:11:06	2022/11/20 16:13:25	0.200959	0.173919	11.0007	16.5019		6.71645	3.08287	1.73632	2.26073	3.44909	1.12382		0.290989	0.102142	14.8715	11.3758		2.09031	1.17195	1.1039	0.68489	1.26276	0.296121		0.119751	0.328282	42.3639	14.3443		2.75802	4.39152	6.65745	2.15743	3.99111	1.00634		0.236483	0.305168	10.0907	31.6094		1.2132	4.63001	1.09088	3.46247	2.59914	0.869168
2022/11/01 16:16:06	2022/11/20 16:18:25	0.200959	0.173919	11.0007	16.5019		6.71645	3.08287	1.73632	2.26073	3.44909	1.12382		0.290989	0.102142	14.8715	11.3758		2.09031	1.17195	1.1039	0.68489	1.26276	0.296121		0.119751	0.330192	42.3639	14.3443		2.75802	4.39343	6.65745	2.15743	3.99158	1.0064		0.236483	0.305168	10.0931	31.6094		1.2132	4.63001	1.09331	3.46247	2.59975	0.868817
2022/11/01 16:21:06	2022/11/20 16:23:25	0.200959	0.173919	11.0007	16.5019		6.71645	3.08287	1.73632	2.26073	3.44909	1.12382		0.290989	0.102142	14.8715	11.3758		2.09031	1.17195	1.1039	0.68489	1.26276	0.296121		0.121125	0.330192	42.3639	14.3443		2.7594	4.39343	6.65745	2.15743	3.99193	1.00626		0.236483	0.305168	10.0931	31.6094		1.2132	4.63001	1.09331	3.46247	2.59975	0.868817
2022/11/01 16:26:06	2022/11/20 16:28:25	0.200959	0.173919	11.0007	16.5019		6.71645	3.08287	1.73632	2.26073	3.44909	1.12382		0.290989	0.102142	14.8715	11.3758		2.09031	1.17195	1.1039	0.68489	1.26276	0.296121		0.127297	0.330192	42.3639	14.3443		2.76557	4.39343	6.65745	2.15743	3.99347	1.00563		0.236483	0.305168	10.0931	31.6171		1.2132	4.63001	1.09331	3.47016	2.60167	0.869455
2022/11/01 16:31:06	2022/11/20 16:33:25	0.200959	0.173919	11.0007	16.5019		6.71645	3.08287	1.73632	2.26073	3.44909	1.12382		0.290989	0.102142	14.8715	11.3758		2.09031	1.17195	1.1039	0.68489	1.26276	0.296121		0.1297	0.330192	42.3639	14.3443		2.76797	4.39343	6.65745	2.15743	3.99407	1.00539		0.236483	0.305168	10.0931	31.6437		1.2132	4.63001	1.09331	3.49676	2.60832	0.871692
2022/11/01 16:36:06	2022/11/20 16:38:25	0.200959	0.173919	11.0007	16.5019		6.71645	3.08287	1.73632	2.26073	3.44909	1.12382		0.290989	0.102142	14.8715	11.3758		2.09031	1.17195	1.1039	0.68489	1.26276	0.296121		0.1297	0.330192	42.3639	14.3443		2.76797	4.39343	6.65745	2.15743	3.99407	1.00539		0.236483	0.305168	10.0931	31.6653		1.2132	4.63001	1.09331	3.51833	2.61371	0.873538
2022/11/01 16:41:06	2022/11/20 16:43:25	0.200959	0.173919	11.0007	16.5019		6.71645	3.08287	1.73632	2.26073	3.44909	1.12382		0.290989	0.102142	14.8715	11.3758		2.09031	1.17195	1.1039	0.68489	1.26276	0.296121		0.1297	0.330192	42.3639	14.3443		2.76797	4.39343	6.65745	2.15743	3.99407	1.00539		0.236483	0.305168	10.0931	31.6669		1.2132	4.63001	1.09331	3.51997	2.61412	0.87368
2022/11/01 16:46:06	2022/11/20 16:48:25	0.200959	0.173919	11.0007	16.5019		6.71645	3.08287	1.73632	2.26073	3.44909	1.12382		0.290989	0.102142	14.8715	11.3758		2.09031	1.17195	1.1039	0.68489	1.26276	0.296121		0.1297	0.330192	42.3639	14.3443		2.76797	4.39343	6.65745	2.15743	3.99407	1.00539		0.236483	0.305168	10.0931	31.6669		1.2132	4.63001	1.09331	3.51997	2.61412	0.87368
2022/11/01 16:51:06	2022/11/20 16:53:25	0.200959	0.173919	11.0007	16.5019		6.71645	3.08287	1.73632	2.26073	3.44909	1.12382		0.290989	0.102142	14.8724	11.3758		2.09031	1.17195	1.10478	0.68489	1.26298	0.296082		0.1297	0.330192	42.3639	14.3443		2.76797	4.39343	6.65745	2.15743	3.99407	1.00539		0.236483	0.305168	10.0931	31.6669		1.2132	4.63001	1.09331	3.51997	2.61412	0.87368
2022/11/01 16:56:06	2022/11/20 16:58:25	0.200959	0.173919	11.0007	16.5019		6.71645	3.08287	1.73632	2.26073	3.44909	1.12382		0.290989	0.102142	14.8735	11.3758		2.09031	1.17195	1.10588	0.68489	1.26326	0.296033		0.1297	0.330192	42.3639	14.3443		2.76797	4.39343	6.65745	2.15743	3.99407	1.00539		0.236483	0.305168	10.0931	31.6669		1.2132	4.63001	1.09331	3.51997	2.61412	0.87368
2022/11/01 17:01:06	2022/11/20 17:03:25	0.200959	0.184159	11.0007	16.5019		6.71645	3.09311	1.73632	2.26073	3.45165	1.12354		0.290989	0.102142	14.8735	11.3758		2.09031	1.17195	1.10588	0.68489	1.26326	0.296033		0.1297	0.333341	42.3639	14.3467		2.76797	4.39658	6.65745	2.15982	3.99546	1.00513		0.236483	0.305168	10.0931	31.6669		1.2132	4.63001	1.09331	3.51997	2.61412	0.87368
2022/11/01 17:06:06	2022/11/20 17:08:25	0.200959	0.244518	11.0007	16.5019		6.71645	3.15347	1.73632	2.26073	3.46674	1.12204		0.290989	0.102142	14.8735	11.3758		2.09031	1.17195	1.10588	0.68489	1.26326	0.296033		0.1297	0.412437	42.3639	14.348		2.76797	4.47568	6.65745	2.16113	4.01556	1.00775		0.236483	0.305168	10.0931	31.6669		1.2132	4.63001	1.09331	3.51997	2.61412	0.87368
2022/11/01 17:11:06	2022/11/20 17:13:25	0.200959	0.246857	11.0007	16.5019		6.71645	3.15581	1.73632	2.26073	3.46733	1.12198		0.290989	0.102142	14.8735	11.3758		2.09031	1.17195	1.10588	0.68489	1.26326	0.296033		0.1297	0.441334	42.3639	14.348		2.76797	4.50457	6.65745	2.16113	4.02278	1.00887		0.236483	0.305168	10.0931	31.6669		1.2132	4.63001	1.09331	3.51997	2.61412	0.87368
2022/11/01 17:16:06	2022/11/20 17:18:25	0.200959	0.246857	11.0007	16.5019		6.71645	3.15581	1.73632	2.26073	3.46733	1.12198		0.290989	0.102142	14.8735	11.3758		2.09031	1.17195	1.10588	0.68489	1.26326	0.296033		0.1297	0.441334	42.3639	14.348		2.76797	4.50457	6.65745	2.16113	4.02278	1.00887		0.236483	0.305168	10.0931	31.6669		1.2132	4.63001	1.09331	3.51997	2.61412	0.87368
2022/11/01 17:21:06	2022/11/20 17:23:25	0.200959	0.246857	11.0007	16.5019		6.71645	3.15581	1.73632	2.26073	3.46733	1.12198		0.290989	0.102142	14.8735	11.3758		2.09031	1.17195	1.10588	0.68489	1.26326	0.296033		0.1297	0.441334	42.3675	14.348		2.76797	4.50457	6.66106	2.16113	4.02368	1.00966		0.236483	0.305168	10.0931	31.6669		1.2132	4.63001	1.09331	3.51997	2.61412	0.87368
2022/11/01 17:26:06	2022/11/20 17:28:25	0.216166	0.246857	11.0007	16.5019		6.73166	3.15581	1.73632	2.26073	3.47113	1.12565		0.290989	0.102773	14.8736	11.3758		2.09031	1.17258	1.10596	0.68489	1.26343	0.296014		0.1297	0.441334	42.4477	14.348		2.76797	4.50457	6.74126	2.16113	4.04373	1.02716		0.250621	0.306008	10.0931	31.6669		1.22734	4.63085	1.09331	3.51997	2.61787	0.871958
2022/11/01 17:31:06	2022/11/20 17:33:25	0.377755	0.247974	11.0007	16.5019		6.89325	3.15692	1.73632	2.26073	3.5118	1.16468		0.290989	0.33386	14.8815	11.3758		2.09031	1.40367	1.11393	0.68489	1.3232	0.295263		0.155242	0.441334	42.5587	14.348		2.79351	4.50457	6.85226	2.16113	4.07787	1.04892		0.299637	0.347743	10.0931	31.6669		1.27636	4.67258	1.09331	3.51997	2.64055	0.873571
2022/11/01 17:36:06	2022/11/20 17:38:25	0.529965	0.259824	11.0007	16.5019		7.04545	3.16877	1.73632	2.26073	3.55282	1.20122		0.290989	0.744484	14.8898	11.3758		2.09031	1.81429	1.12224	0.68489	1.42793	0.320621		0.195191	0.441334	42.6697	14.348		2.83346	4.50457	6.96327	2.16113	4.11561	1.06944		0.527425	0.398566	10.0931	31.6669		1.50415	4.72341	1.09331	3.51997	2.71021	0.85526
2022/11/01 17:41:06	2022/11/20 17:43:25	0.540011	0.259857	11.0007	16.5019		7.0555	3.16881	1.73632	2.26073	3.55534	1.20365		0.290989	0.884281	14.89	11.3758		2.09031	1.95409	1.12237	0.68489	1.46291	0.336176		0.195191	0.441334	42.7793	14.348		2.83346	4.50457	7.07283	2.16113	4.143	1.09382		0.559727	0.402545	10.0931	31.6669		1.53645	4.72738	1.09331	3.51997	2.71928	0.852275
2022/11/01 17:46:06	2022/11/20 17:48:25	0.540011	0.259857	11.0007	16.5019		7.0555	3.16881	1.73632	2.26073	3.55534	1.20365		0.290989	0.884281	14.89	11.3758		2.09031	1.95409	1.12237	0.68489	1.46291	0.336176		0.195191	0.441334	42.8183	14.348		2.83346	4.50457	7.11184	2.16113	4.15275	1.10254		0.559727	0.409289	10.0931	31.6669		1.53645	4.73413	1.09331	3.51997	2.72096	0.853599
2022/11/01 17:51:06	2022/11/20 17:53:25	0.540011	0.259857	11.0007	16.5019		7.0555	3.16881	1.73632	2.26073	3.55534	1.20365		0.290989	0.884281	14.89	11.3758		2.09031	1.95409	1.12237	0.68489	1.46291	0.336176		0.195191	0.441334	42.8183	14.348		2.83346	4.50457	7.11184	2.16113	4.15275	1.10254		0.559727	0.415391	10.0931	31.6669		1.53645	4.74023	1.09331	3.51997	2.72249	0.854799
2022/11/01 17:56:06	2022/11/20 17:58:25	0.540011	0.259857	11.0007	16.505		7.0555	3.16881	1.73632	2.26383	3.55611	1.20338		0.290989	0.884281	14.89	11.3758		2.09031	1.95409	1.12237	0.68489	1.46291	0.336176		0.195191	0.441334	42.8183	14.348		2.83346	4.50457	7.11184	2.16113	4.15275	1.10254		0.559727	0.415391	10.0931	31.6669		1.53645	4.74023	1.09331	3.51997	2.72249	0.854799
2022/11/01 18:01:06	2022/11/20 18:03:25	0.540011	0.259857	11.0119	16.5217		0	0	0	0	0	0		0.290989	0.884281	14.8954	11.3758		0	0	0	0	0	0		0.195191	0.441334	42.8361	14.3497		0	0	0	0	0	0		0.561211	0.415391	10.099	31.6675		0	0	0	0	0	0
2022/11/01 18:06:06	2022/11/20 18:08:25	0.596223	0.286471	11.0443	16.54		0.0562127	0.0266134	0.0324	0.01827	0.033374	0.00814653		0.290989	0.884281	14.9056	11.3758		0	0	0.01019	0	0.0025475	0.0025475		0.195191	0.441334	42.9366	14.3523		0	0	0.10056	0.00263	0.0257975	0.0249285		0.593438	0.415391	10.126	31.7787		0.032227	0	0.02694	0.11126	0.0426067	0.0239475
2022/11/01 18:11:06	2022/11/20 18:13:25	0.808976	0.375614	11.0771	16.5494		0.268965	0.115757	0.06515	0.0277	0.119393	0.0530212		0.290989	0.884281	14.9211	11.3758		0	0	0.02567	0	0.0064175	0.0064175		0.195191	0.441335	42.9436	14.3523		0	1.2e-06	0.1075	0.00263	0.0275328	0.0266629		0.634539	0.415391	10.126	31.879		0.0733284	0	0.02694	0.21148	0.0779371	0.0470194
2022/11/01 18:16:06	2022/11/20 18:18:25	1.03096	0.46511	11.0906	16.5703		0.490945	0.205253	0.07863	0.04858	0.205852	0.100912		0.290989	0.884281	14.9376	11.3758		0	0	0.04218	0	0.010545	0.010545		0.207368	0.459568	42.9436	14.3523		0.0121773	0.018234	0.1075	0.00263	0.0351353	0.0243344		0.642855	0.415689	10.126	31.879		0.0816441	0.0002984	0.02694	0.21151	0.0800981	0.0469621
2022/11/01 18:21:06	2022/11/20 18:23:25	1.18855	0.492901	11.0921	16.5972		0.648535	0.233044	0.08012	0.07548	0.259295	0.134811		0.290989	0.884281	14.9411	11.3758		0	0	0.04568	0	0.01142	0.01142		0.21161	0.495111	42.9436	14.3523		0.0164188	0.0537772	0.1075	0.00263	0.0450815	0.0234438		0.642855	0.436187	10.126	31.879		0.0816441	0.0207961	0.02694	0.21151	0.0852226	0.0442615
2022/11/01 18:26:06	2022/11/20 18:28:25	1.22353	0.492901	11.1114	16.6241		0.683515	0.233044	0.0995	0.10237	0.279607	0.138191		0.303098	0.884407	14.9411	11.3758		0.0121092	0.0001263	0.04568	0	0.0144789	0.010781		0.21161	0.50853	42.9436	14.3523		0.0164188	0.0671966	0.1075	0.00263	0.0484363	0.0240898		0.642855	0.468937	10.126	31.879		0.0816441	0.0535459	0.02694	0.21151	0.09341	0.0409201
2022/11/01 18:31:06	2022/11/20 18:33:25	1.2743	0.492901	11.136	16.6506		0.73429	0.233044	0.1241	0.12887	0.305076	0.145263		0.350906	0.887027	14.9411	11.3758		0.0599166	0.0027461	0.04568	0	0.0270857	0.0151373		0.220439	0.50853	42.9436	14.3523		0.0252478	0.0671966	0.1075	0.00263	0.0506436	0.0231965		0.642855	0.499044	10.126	31.879		0.0816441	0.0836532	0.02694	0.21151	0.100937	0.0391289
2022/11/01 18:36:06	2022/11/20 18:38:25	1.28971	0.495488	11.1606	16.6598		0.7497	0.23563	0.14871	0.1381	0.318035	0.145537		0.401045	0.887857	14.9411	11.3758		0.110056	0.0035755	0.04568	0	0.0398279	0.0256039		0.220887	0.50853	42.9438	14.3617		0.0256962	0.0671966	0.10771	0.01205	0.0531632	0.0216353		0.655314	0.504906	10.126	31.879		0.0941033	0.0895147	0.02694	0.21151	0.105517	0.0385089
2022/11/01 18:41:06	2022/11/20 18:43:25	1.31536	0.551696	11.1799	16.6598		0.77535	0.291839	0.16798	0.1381	0.343317	0.147806		0.438368	0.887857	14.9498	11.3783		0.147379	0.0035755	0.05441	0.00245	0.0519537	0.0340381		0.258464	0.549868	42.9826	14.423		0.0632724	0.108534	0.14655	0.07337	0.0979316	0.0188872		0.712996	0.529298	10.126	31.879		0.151785	0.113907	0.02694	0.21151	0.126035	0.0386609
2022/11/01 18:46:06	2022/11/20 18:48:25	1.34172	0.62923	11.1814	16.6634		0.801707	0.369373	0.16942	0.14171	0.370553	0.152403		0.440405	0.887857	15.0085	11.4032		0.149415	0.0035755	0.11312	0.02735	0.0733653	0.0345833		0.315129	0.649135	43.0501	14.4768		0.119938	0.207801	0.21407	0.12714	0.167237	0.0253044		0.774794	0.538628	10.126	31.8825		0.213583	0.123237	0.02694	0.21499	0.144687	0.0447341
2022/11/01 18:51:06	2022/11/20 18:53:25	1.36807	0.700918	11.1814	16.6636		0.828064	0.44106	0.16942	0.14191	0.395114	0.159323		0.451753	0.887857	15.0612	11.4285		0.160764	0.0035755	0.16577	0.05266	0.0956922	0.0402931		0.325822	0.682084	43.1172	14.4821		0.130631	0.24075	0.28117	0.13249	0.19626	0.0382567		0.836592	0.541684	10.126	31.9026		0.275381	0.126293	0.02694	0.23513	0.165936	0.056019
2022/11/01 18:56:06	2022/11/20 18:58:25	1.39315	0.736424	11.1814	16.6636		0.853141	0.476567	0.16942	0.14191	0.41026	0.165971		0.471075	0.887857	15.0684	11.4312		0.180086	0.0035755	0.17296	0.0554	0.103005	0.043768		0.335603	0.682084	43.1439	14.5023		0.140412	0.24075	0.30781	0.15261	0.210395	0.0394207		0.897092	0.604534	10.1263	31.9249		0.335881	0.189143	0.02725	0.25744	0.202428	0.0656378
2022/11/01 19:01:06	2022/11/20 19:03:25	1.40753	0.758726	11.1814	16.6636		0.867519	0.498869	0.16942	0.14191	0.41943	0.169955		0.471075	0.887857	15.0701	11.4342		0.180086	0.0035755	0.17469	0.05836	0.104178	0.043736		0.355879	0.708026	43.1439	14.5093		0.160688	0.266692	0.30781	0.15967	0.223715	0.0376311		0.91662	0.616846	10.13	31.9472		0.35541	0.201455	0.03097	0.27976	0.216899	0.0694891
2022/11/01 19:06:06	2022/11/20 19:08:25	1.48801	0.77617	11.1814	16.6636		0.948003	0.516312	0.16942	0.14191	0.443911	0.188393		0.471075	0.887857	15.0701	11.4346		0.180086	0.0035755	0.17469	0.05882	0.104293	0.043696		0.393343	0.761976	43.1439	14.5093		0.198152	0.320643	0.30781	0.15967	0.246569	0.0399302		0.91662	0.616865	10.13	31.9692		0.35541	0.201474	0.03097	0.30172	0.222393	0.0713364
2022/11/01 19:11:06	2022/11/20 19:13:25	1.58557	0.779999	11.1814	16.6636		1.04556	0.520142	0.16942	0.14191	0.469259	0.210511		0.471075	0.887857	15.0701	11.4346		0.180086	0.0035755	0.17469	0.05882	0.104293	0.043696		0.406798	0.765092	43.1439	14.5093		0.211607	0.323758	0.30781	0.15967	0.250711	0.0391724		0.91662	0.629289	10.13	31.9767		0.35541	0.213898	0.03097	0.30925	0.227382	0.0717942
2022/11/01 19:16:06	2022/11/20 19:18:25	1.67244	0.794484	11.1814	16.6636		1.13243	0.534627	0.16942	0.14191	0.494596	0.23068		0.471075	0.887857	15.0701	11.4346		0.180086	0.0035755	0.17469	0.05882	0.104293	0.043696		0.411434	0.765092	43.1439	14.5093		0.216243	0.323758	0.30781	0.15967	0.25187	0.0388021		0.91662	0.635218	10.13	31.9767		0.35541	0.219827	0.03097	0.30925	0.228864	0.0717167
2022/11/01 19:21:06	2022/11/20 19:23:25	1.70414	0.82778	11.1814	16.6641		1.16413	0.567922	0.16942	0.14244	0.510977	0.238455		0.598891	0.887857	15.0701	11.4346		0.307901	0.0035755	0.17469	0.05882	0.136247	0.0674165		0.411434	0.765092	43.1439	14.5093		0.216243	0.323758	0.30781	0.15967	0.25187	0.0388021		0.91662	0.760775	10.1402	31.9767		0.35541	0.345384	0.04121	0.30925	0.262813	0.0745298
2022/11/01 19:26:06	2022/11/20 19:28:25	1.74768	0.866796	11.1814	16.7019		1.20767	0.606938	0.16942	0.18022	0.541061	0.244443		0.692082	0.887857	15.0701	11.4346		0.401093	0.0035755	0.17469	0.05882	0.159545	0.0880562		0.411434	0.765092	43.209	14.5093		0.216243	0.323758	0.37297	0.15967	0.26816	0.0487696		0.91662	0.81631	10.1639	31.9767		0.35541	0.400919	0.06491	0.30925	0.282622	0.0749442
2022/11/01 19:31:06	2022/11/20 19:33:25	1.79141	0.917169	11.1877	16.7626		1.2514	0.657312	0.17574	0.24088	0.581334	0.247518		0.692082	0.887857	15.0701	11.4346		0.401093	0.0035755	0.17469	0.05882	0.159545	0.0880562		0.411434	0.779173	43.3652	14.5167		0.216243	0.337839	0.52914	0.16705	0.312568	0.0806205		0.91662	0.81631	10.1639	31.9767		0.35541	0.400919	0.06491	0.30925	0.282622	0.0749442
2022/11/01 19:36:06	2022/11/20 19:38:25	1.83515	0.917169	11.1904	16.8143		1.29514	0.657312	0.17842	0.29263	0.605876	0.251425		0.692082	0.888042	15.0701	11.4348		0.401093	0.0037607	0.17469	0.05898	0.159631	0.0880136		0.411434	0.824175	43.5184	14.5622		0.216243	0.382842	0.6823	0.21255	0.373484	0.110333		0.91662	0.81631	10.1639	31.9767		0.35541	0.400919	0.06491	0.30925	0.282622	0.0749442
2022/11/01 19:41:06	2022/11/20 19:43:25	1.8708	0.917169	11.1987	16.8223		1.33079	0.657312	0.18674	0.30061	0.618862	0.257606		0.692082	0.891849	15.071	11.4373		0.401093	0.007568	0.17559	0.0615	0.161438	0.0872249		0.411434	0.824311	43.5764	14.6131		0.216243	0.382978	0.74034	0.26347	0.400758	0.118507		0.930812	0.81631	10.1639	31.9767		0.369602	0.400919	0.06491	0.30925	0.28617	0.0761669
2022/11/01 19:46:06	2022/11/20 19:48:25	1.87415	0.917169	11.2242	16.8251		1.33414	0.657312	0.21226	0.30341	0.626781	0.254573		0.692121	0.891854	15.1165	11.4374		0.401132	0.0075732	0.22114	0.06159	0.172859	0.0885719		0.463939	0.840012	43.6232	14.664		0.268748	0.398678	0.78709	0.3144	0.442229	0.118061		0.974466	0.81631	10.1639	32.0601		0.413255	0.400919	0.06491	0.39259	0.317918	0.0844429
2022/11/01 19:51:06	2022/11/20 19:53:25	1.87415	0.917169	11.2304	16.8251		1.33414	0.657312	0.21846	0.30341	0.628331	0.253735		0.70265	0.891854	15.1312	11.4407		0.41166	0.0075732	0.23578	0.06487	0.179971	0.0911792		0.656931	0.86445	43.6602	14.715		0.46174	0.423116	0.82408	0.36532	0.518564	0.103748		0.977928	0.81631	10.1639	32.1534		0.416718	0.400919	0.06491	0.48595	0.342124	0.0942313
2022/11/01 19:56:06	2022/11/20 19:58:25	1.87415	0.917169	11.2304	16.8255		1.33414	0.657312	0.21846	0.30376	0.628419	0.253698		0.721353	0.891854	15.1312	11.4455		0.430364	0.0075732	0.23578	0.06973	0.185862	0.094669		0.729585	0.869536	43.6955	14.746		0.534394	0.428202	0.85944	0.39631	0.554587	0.105817		0.977928	0.81631	10.1639	32.1534		0.416718	0.400919	0.06491	0.48595	0.342124	0.0942313
2022/11/01 20:01:06	2022/11/20 20:03:25	1.87415	0.917169	11.2304	16.8265		1.33414	0.657312	0.21846	0.30484	0.628689	0.253583		0.739598	0.891854	15.1312	11.4499		0.448609	0.0075732	0.23578	0.07407	0.191508	0.0981854		0.729585	0.869536	43.7902	14.7463		0.534394	0.428202	0.95417	0.39664	0.578352	0.128691		1.00903	0.81631	10.1639	32.1534		0.44782	0.400919	0.06491	0.48595	0.3499	0.0965747
2022/11/01 20:06:06	2022/11/20 20:08:25	1.87415	0.917169	11.2313	16.8269		1.33414	0.657312	0.21935	0.30515	0.628989	0.25343		0.745263	0.891854	15.1333	11.4506		0.454274	0.0075732	0.23791	0.07477	0.193632	0.0994321		0.729585	0.869536	43.8194	14.7463		0.534394	0.428202	0.98329	0.39664	0.585632	0.135788		1.08465	0.81631	10.1639	32.1534		0.523436	0.400919	0.06491	0.48595	0.368804	0.10449
2022/11/01 20:11:06	2022/11/20 20:13:25	1.87415	0.917169	11.2594	16.8269		1.33414	0.657312	0.24744	0.30515	0.636011	0.249716		0.745263	0.891854	15.1353	11.4506		0.454274	0.0075732	0.23989	0.07477	0.194127	0.0995068		0.729585	0.869536	43.9017	14.7463		0.534394	0.428202	1.0656	0.39664	0.606209	0.155939		1.13175	0.81631	10.1639	32.1534		0.570539	0.400919	0.06491	0.48595	0.380579	0.110773
2022/11/01 20:16:06	2022/11/20 20:18:25	1.87415	0.917169	11.3003	16.8269		1.33414	0.657312	0.28836	0.30515	0.646241	0.244566		0.746305	0.891854	15.1353	11.457		0.455316	0.0075732	0.23989	0.08122	0.196	0.0991003		0.729585	0.869536	43.9852	14.7463		0.534394	0.428202	1.14914	0.39664	0.627094	0.176492		1.26012	0.81631	10.1639	32.1669		0.698914	0.400919	0.06491	0.49941	0.416038	0.132442
2022/11/01 20:21:06	2022/11/20 20:23:25	1.87415	0.917893	11.3412	16.8269		1.33414	0.658036	0.32927	0.30515	0.65665	0.239744		0.765406	0.918581	15.1353	11.4584		0.474417	0.0342996	0.23989	0.08262	0.207807	0.0991156		0.729585	0.869536	44.026	14.7463		0.534394	0.428202	1.18994	0.39664	0.637294	0.186556		1.324	0.81631	10.1639	32.2134		0.762788	0.400919	0.06491	0.54595	0.443642	0.146511
2022/11/01 20:26:06	2022/11/20 20:28:25	1.87415	0.963444	11.3821	16.8269		1.33414	0.703586	0.37018	0.30515	0.678265	0.235398		0.791066	0.948921	15.1355	11.4584		0.500077	0.0646401	0.24007	0.08262	0.221852	0.100765		0.729585	0.869536	44.026	14.7463		0.534394	0.428202	1.18994	0.39664	0.637294	0.186556		1.324	0.81631	10.1639	32.2615		0.762788	0.400919	0.06491	0.59401	0.455657	0.149764
2022/11/01 20:31:06	2022/11/20 20:33:25	1.87415	1.03555	11.423	16.8269		1.33414	0.775693	0.41109	0.30515	0.706519	0.232212		0.816726	0.948921	15.1651	11.4584		0.525737	0.0646401	0.26968	0.08262	0.235669	0.107227		0.729585	0.869536	44.026	14.7463		0.534394	0.428202	1.18994	0.39664	0.637294	0.186556		1.324	0.81631	10.1639	32.3069		0.762788	0.400919	0.06491	0.63938	0.466999	0.153636
2022/11/01 20:36:06	2022/11/20 20:38:25	1.87415	1.10754	11.4464	16.8269		1.33414	0.847682	0.4345	0.30515	0.730369	0.232138		0.84035	0.948921	15.2134	11.459		0.549361	0.0646401	0.31803	0.08316	0.253798	0.114157		0.737716	0.878777	44.026	14.7535		0.542525	0.437443	1.18994	0.40384	0.643437	0.184547		1.324	0.81631	10.1639	32.3176		0.762788	0.400919	0.06491	0.65016	0.469694	0.154664
2022/11/01 20:41:06	2022/11/20 20:43:25	1.87415	1.13973	11.4466	16.8283		1.33414	0.879875	0.43462	0.30662	0.738814	0.233388		0.844994	0.948921	15.2316	11.4729		0.554005	0.0646401	0.33624	0.09713	0.263004	0.114349		0.824103	0.901886	44.026	14.7887		0.628912	0.460553	1.18994	0.43907	0.679619	0.175322		1.324	0.81631	10.1639	32.3415		0.762788	0.400919	0.06491	0.67399	0.475652	0.157077
2022/11/01 20:46:06	2022/11/20 20:48:25	1.87415	1.13973	11.4502	16.8723		1.33414	0.879875	0.43828	0.35056	0.750714	0.22635		0.844994	0.948921	15.2676	11.4857		0.554005	0.0646401	0.37224	0.10993	0.275204	0.115036		0.891057	0.925132	44.026	14.8268		0.695865	0.483798	1.18994	0.47712	0.711681	0.167315		1.324	0.81631	10.1639	32.377		0.762788	0.400919	0.06491	0.70948	0.484524	0.161013
2022/11/01 20:51:06	2022/11/20 20:53:25	1.87415	1.13973	11.4636	16.9358		1.33414	0.879875	0.4517	0.41408	0.769949	0.215701		0.844994	0.948921	15.2804	11.5063		0.554005	0.0646401	0.38496	0.13045	0.283514	0.113575		0.89212	0.944755	44.026	14.8648		0.696929	0.503421	1.18994	0.51517	0.726365	0.160747		1.324	0.81631	10.1639	32.4478		0.762788	0.400919	0.06491	0.78036	0.502244	0.16999
2022/11/01 20:56:06	2022/11/20 20:58:25	1.87415	1.13973	11.4678	16.9993		1.33414	0.879875	0.45585	0.47759	0.786864	0.206838		0.844994	0.948921	15.3099	11.5256		0.554005	0.0646401	0.41452	0.14982	0.295746	0.113838		0.89212	0.947022	44.026	14.9029		0.696929	0.505688	1.18994	0.55323	0.736447	0.156534		1.324	0.81631	10.1639	32.5003		0.762788	0.400919	0.06491	0.83284	0.515364	0.177486
2022/11/01 21:01:06	2022/11/20 21:03:25	1.87415	1.13973	11.4695	17.0469		1.33414	0.879875	0.45757	0.52517	0.799189	0.20093		0.844994	0.948921	15.3273	11.5291		0.554005	0.0646401	0.43188	0.15326	0.300946	0.115049		0.932582	0.947022	44.026	14.9409		0.737391	0.505688	1.18994	0.59128	0.756075	0.152326		1.324	0.8313	10.1639	32.5031		0.762788	0.415909	0.06491	0.83558	0.519797	0.177125
2022/11/01 21:06:06	2022/11/20 21:08:25	1.87415	1.13973	11.4702	17.0496		1.33414	0.879875	0.45826	0.52788	0.800039	0.200525		0.844994	0.948921	15.3273	11.5412		0.554005	0.0646401	0.43188	0.16535	0.303969	0.113788		1.05115	0.947022	44.026	14.9771		0.855962	0.505688	1.18994	0.6274	0.794748	0.150412		1.324	0.873079	10.1639	32.5031		0.762788	0.457688	0.06491	0.83558	0.530242	0.175382
2022/11/01 21:11:06	2022/11/20 21:13:25	1.88691	1.13973	11.4783	17.0505		1.3469	0.879875	0.46633	0.52879	0.805473	0.202124		0.844994	0.948921	15.3273	11.5552		0.554005	0.0646401	0.43188	0.17939	0.307479	0.112409		1.06686	0.947022	44.026	15.0259		0.87167	0.505688	1.18997	0.67629	0.810905	0.146817		1.324	0.887096	10.1639	32.5031		0.762788	0.471705	0.06491	0.83558	0.533746	0.174933
2022/11/01 21:16:06	2022/11/20 21:18:25	1.96094	1.13973	11.4891	17.0522		1.42093	0.879875	0.4772	0.53049	0.827124	0.217146		0.844994	0.948921	15.3289	11.559		0.554005	0.0646401	0.4335	0.18323	0.308844	0.112197		1.06686	0.947022	44.0972	15.4279		0.87167	0.505688	1.26117	1.07822	0.929187	0.16204		1.324	0.915757	10.1639	32.5031		0.762788	0.500366	0.06491	0.83558	0.540911	0.174232
2022/11/01 21:21:06	2022/11/20 21:23:25	2.00241	1.13973	11.4993	17.0528		1.4624	0.879875	0.48739	0.53112	0.840197	0.225225		0.844994	0.948921	15.3292	11.559		0.554005	0.0646401	0.43379	0.18323	0.308916	0.112224		1.06686	0.947022	44.1046	15.8125		0.87167	0.505688	1.26853	1.4629	1.0272	0.212963		1.324	0.938854	10.1639	32.5031		0.762788	0.523463	0.06491	0.83558	0.546685	0.173879
2022/11/01 21:26:06	2022/11/20 21:28:25	2.00241	1.13984	11.5021	17.0528		1.4624	0.87998	0.49015	0.53112	0.840913	0.224867		0.844994	0.948921	15.3292	11.559		0.554005	0.0646401	0.43379	0.18323	0.308916	0.112224		1.06686	0.947022	44.1046	15.8473		0.87167	0.505688	1.26853	1.49764	1.03588	0.218978		1.347	0.955841	10.1639	32.5031		0.785789	0.54045	0.06491	0.83558	0.556682	0.176157
2022/11/01 21:31:06	2022/11/20 21:33:25	2.00241	1.20534	11.5308	17.0528		1.4624	0.945486	0.5189	0.53112	0.864477	0.222604		0.850498	0.948921	15.3292	11.559		0.559508	0.0646401	0.43379	0.18323	0.310292	0.113229		1.06686	0.947022	44.1046	15.8532		0.87167	0.505688	1.26853	1.50353	1.03735	0.220016		1.39378	1.0036	10.1639	32.5031		0.832565	0.588206	0.06491	0.83558	0.580315	0.181313
2022/11/01 21:36:06	2022/11/20 21:38:25	2.00241	1.32514	11.5415	17.0528		1.4624	1.06528	0.52959	0.53112	0.897099	0.226726		0.863099	0.948921	15.3292	11.559		0.572109	0.0646401	0.43379	0.18323	0.313442	0.11556		1.07847	0.947022	44.1046	15.8532		0.883279	0.505688	1.26853	1.50353	1.04026	0.219305		1.43823	1.12173	10.1639	32.5031		0.877022	0.706337	0.06491	0.83558	0.620962	0.188881
2022/11/01 21:41:06	2022/11/20 21:43:25	2.00241	1.37059	11.5415	17.0528		1.4624	1.11073	0.52959	0.53112	0.908462	0.2298		0.868469	0.948921	15.3292	11.559		0.577479	0.0646401	0.43379	0.18323	0.314785	0.116565		1.09219	0.947022	44.1046	15.8532		0.896999	0.505688	1.26853	1.50353	1.04369	0.218512		1.85663	1.12346	10.1639	32.5031		1.29542	0.708069	0.06491	0.83558	0.725995	0.253904
2022/11/01 21:46:06	2022/11/20 21:48:25	2.00241	1.40089	11.5415	17.0528		1.4624	1.14103	0.52959	0.53112	0.916036	0.232135		0.878815	0.953582	15.3292	11.559		0.587826	0.0693008	0.43379	0.18323	0.318537	0.117695		1.09228	0.947022	44.1046	15.8532		0.897086	0.505688	1.26853	1.50353	1.04371	0.218507		2.25069	1.12346	10.1639	32.5031		1.68948	0.708069	0.06491	0.83558	0.824511	0.334023
2022/11/01 21:51:06	2022/11/20 21:53:25	2.00241	1.42646	11.5415	17.0528		1.4624	1.1666	0.52959	0.53112	0.922428	0.234278		0.88945	0.978229	15.3292	11.559		0.59846	0.0939483	0.43379	0.18323	0.327357	0.115498		1.09393	0.947022	44.1046	15.8532		0.898738	0.505688	1.26853	1.50353	1.04412	0.218415		2.25175	1.12346	10.1639	32.5031		1.69053	0.708069	0.06491	0.83558	0.824773	0.334249
2022/11/01 21:56:06	2022/11/20 21:58:25	2.00241	1.4268	11.5415	17.0528		1.4624	1.16694	0.52959	0.53112	0.922513	0.234308		0.894254	0.997279	15.3292	11.559		0.603265	0.112998	0.43379	0.18323	0.333321	0.113296		1.09393	0.960742	44.1046	15.8532		0.898738	0.519408	1.26853	1.50353	1.04755	0.215606		2.28852	1.12346	10.1639	32.5031		1.72731	0.708069	0.06491	0.83558	0.833968	0.342219
2022/11/01 22:01:06	2022/11/20 22:03:25	2.00241	1.43376	11.5415	17.0528		1.4624	1.1739	0.52959	0.53112	0.924253	0.234919		0.910097	0.998022	15.3292	11.559		0.619108	0.113741	0.43383	0.18323	0.337477	0.116351		1.09407	1.00228	44.1046	15.8532		0.898882	0.560946	1.26853	1.50353	1.05797	0.207204		2.30242	1.12346	10.1639	32.5031		1.74121	0.708069	0.06491	0.83558	0.837441	0.345246
2022/11/01 22:06:06	2022/11/20 22:08:25	2.10242	1.43796	11.5415	17.0705		1.56241	1.1781	0.52959	0.54883	0.954734	0.252433		0.934429	0.998022	15.373	11.559		0.64344	0.113741	0.47763	0.18323	0.35451	0.124481		1.17187	1.04462	44.1046	15.8532		0.976681	0.603289	1.26853	1.50353	1.08801	0.194206		2.30356	1.12346	10.1639	32.5031		1.74235	0.708069	0.06491	0.83558	0.837728	0.345496
2022/11/01 22:11:06	2022/11/20 22:13:25	2.5632	1.43796	11.5415	17.1462		2.02319	1.1781	0.52959	0.62445	1.08883	0.34271		0.939213	0.998022	15.4323	11.559		0.648224	0.113741	0.53695	0.18323	0.370536	0.130968		1.31489	1.06587	44.1559	15.8532		1.1197	0.624531	1.31981	1.50353	1.14189	0.189427		2.32694	1.21503	10.1639	32.5031		1.76572	0.799643	0.06491	0.83558	0.866464	0.348398
2022/11/01 22:16:06	2022/11/20 22:18:25	2.58321	1.43796	11.5415	17.2263		2.0432	1.1781	0.52959	0.70455	1.11386	0.338711		0.939213	0.998022	15.4348	11.559		0.648224	0.113741	0.53944	0.18323	0.371159	0.131233		1.40105	1.06587	44.2623	15.8532		1.20586	0.624531	1.42622	1.50353	1.19004	0.198769		2.32702	1.34236	10.1639	32.5031		1.76581	0.92697	0.06491	0.83558	0.898317	0.347834
2022/11/01 22:21:06	2022/11/20 22:23:25	2.75197	1.43796	11.5415	17.2805		2.21196	1.1781	0.52959	0.75884	1.16962	0.372484		0.939213	0.998022	15.4348	11.559		0.648224	0.113741	0.53944	0.18323	0.371159	0.131233		1.40322	1.06587	44.3687	15.8544		1.20802	0.624531	1.53265	1.5047	1.21748	0.210852		2.32702	1.39237	10.1657	32.5031		1.76581	0.976981	0.06663	0.83558	0.911249	0.348054
2022/11/01 22:26:06	2022/11/20 22:28:25	2.8943	1.43796	11.5416	17.285		2.35429	1.1781	0.52963	0.76328	1.20632	0.405464		0.939213	0.998022	15.4833	11.559		0.648224	0.113741	0.58788	0.18323	0.383269	0.136848		1.69752	1.06587	44.4402	15.8576		1.50232	0.624531	1.60411	1.50798	1.30974	0.229592		2.32702	1.42284	10.1661	32.5031		1.76581	1.00745	0.06705	0.83558	0.918972	0.348531
2022/11/01 22:31:06	2022/11/20 22:33:25	3.03228	1.48366	11.5699	17.2876		2.49227	1.2238	0.55793	0.7659	1.25997	0.43367		0.939213	0.998022	15.7015	11.559		0.648224	0.113741	0.8061	0.18323	0.437824	0.17072		1.96547	1.06587	44.5135	15.8707		1.77028	0.624531	1.67739	1.52109	1.39832	0.263005		2.32702	1.44933	10.1661	32.5031		1.76581	1.03394	0.06705	0.83558	0.925595	0.349153
2022/11/01 22:36:06	2022/11/20 22:38:25	3.21174	1.57535	11.6225	17.3068		2.67173	1.31549	0.61058	0.78507	1.34572	0.466723		0.939213	0.998022	15.9344	11.559		0.648224	0.113741	1.03899	0.18323	0.496046	0.216402		1.96781	1.06587	44.6142	15.8924		1.77262	0.624531	1.7781	1.54276	1.4295	0.27387		2.32702	1.45247	10.1661	32.5031		1.76581	1.03708	0.06705	0.83558	0.926378	0.349235
2022/11/01 22:41:06	2022/11/20 22:43:25	3.35487	1.66613	11.6752	17.3835		2.81486	1.40627	0.66322	0.86183	1.43655	0.485541		0.939213	0.998022	16.1673	11.559		0.648224	0.113741	1.27187	0.18323	0.554266	0.267007		1.98983	1.06587	44.7149	15.8924		1.79464	0.624531	1.87881	1.54276	1.46018	0.287553		2.32702	1.46324	10.1661	32.5031		1.76581	1.04785	0.06705	0.83558	0.929072	0.34953
2022/11/01 22:46:06	2022/11/20 22:48:25	3.38029	1.6999	11.7278	17.4561		2.84027	1.44005	0.71586	0.9344	1.48265	0.477276		0.939213	0.998022	16.3603	11.559		0.648224	0.113741	1.46491	0.18323	0.602526	0.310982		1.99	1.06587	44.8156	15.8924		1.79481	0.624531	1.97951	1.54276	1.4854	0.300592		2.32702	1.47279	10.1661	32.5031		1.76581	1.05739	0.06705	0.83558	0.931458	0.349808
2022/11/01 22:51:06	2022/11/20 22:53:25	3.38029	1.72178	11.7579	17.4684		2.84027	1.46192	0.74598	0.94668	1.49871	0.471919		0.939213	0.998022	16.4001	11.559		0.648224	0.113741	1.5047	0.18323	0.612474	0.320199		2.00415	1.06587	44.9163	15.8924		1.80896	0.624531	2.08022	1.54276	1.51412	0.316173		2.32702	1.47372	10.1661	32.5031		1.76581	1.05833	0.06705	0.83558	0.931692	0.349837
2022/11/01 22:56:06	2022/11/20 22:58:25	3.38029	1.74775	11.7921	17.4684		2.84027	1.4879	0.78018	0.94668	1.51376	0.467264		0.939213	0.998022	16.4015	11.559		0.648224	0.113741	1.50608	0.18323	0.612819	0.32052		2.00822	1.06587	45.0017	15.8924		1.81303	0.624531	2.16561	1.54276	1.53648	0.329643		2.32702	1.47372	10.1661	32.5061		1.76581	1.05833	0.06705	0.83859	0.932445	0.349769
2022/11/01 23:01:06	2022/11/20 23:03:25	3.38115	1.75145	11.8202	17.4684		2.84114	1.49159	0.80828	0.94668	1.52192	0.463811		0.939213	1.00241	16.4015	11.559		0.648224	0.118129	1.50608	0.18323	0.613916	0.319952		2.00822	1.06587	45.0118	15.8924		1.81303	0.624531	2.17573	1.54276	1.53901	0.331258		2.32702	1.47372	10.1661	32.5532		1.76581	1.05833	0.06705	0.88574	0.944232	0.348912
2022/11/01 23:06:06	2022/11/20 23:08:25	3.40192	1.75145	11.8483	17.4684		2.86191	1.49159	0.83636	0.94668	1.53413	0.465187		1.12027	1.02562	16.4032	11.559		0.829281	0.141336	1.50785	0.18323	0.665424	0.321936		2.00822	1.06587	45.0118	15.8924		1.81303	0.624531	2.17573	1.54276	1.53901	0.331258		2.32702	1.49052	10.1661	32.615		1.76581	1.07513	0.06705	0.94754	0.963881	0.348811
2022/11/01 23:11:06	2022/11/20 23:13:25	3.40192	1.75145	11.8761	17.4684		2.86191	1.49159	0.86419	0.94668	1.54109	0.461748		1.27976	1.05097	16.4039	11.559		0.988769	0.166691	1.50848	0.18323	0.711792	0.32761		2.00822	1.06587	45.0118	15.8924		1.81303	0.624531	2.17573	1.54277	1.53901	0.331258		2.32702	1.53265	10.1661	32.6768		1.76581	1.11726	0.06705	1.00934	0.989864	0.350034
2022/11/01 23:16:06	2022/11/20 23:18:25	3.40192	1.75145	11.9176	17.4684		2.86191	1.49159	0.90567	0.94668	1.55146	0.45677		1.27976	1.07633	16.4093	11.559		0.988769	0.192047	1.51392	0.18323	0.719491	0.325244		2.00822	1.06709	45.0118	15.8958		1.81303	0.625756	2.17573	1.54614	1.54016	0.33098		2.32702	1.59291	10.1661	32.7386		1.76581	1.17752	0.06705	1.07114	1.02038	0.352582
2022/11/01 23:21:06	2022/11/20 23:23:25	3.40192	1.75145	11.959	17.4684		2.86191	1.49159	0.94712	0.94668	1.56182	0.451979		1.74754	1.09462	16.4399	11.559		1.45655	0.210336	1.54446	0.18323	0.848645	0.376821		2.00822	1.07938	45.0118	15.8968		1.81303	0.638047	2.17573	1.54713	1.54348	0.328154		2.32702	1.62833	10.1661	32.7773		1.76581	1.21294	0.06705	1.10981	1.0389	0.354519
2022/11/01 23:26:06	2022/11/20 23:28:25	3.40192	1.75145	11.9781	17.4684		2.86191	1.49159	0.96617	0.94668	1.56659	0.44984		2.10284	1.16173	16.4449	11.5624		1.81185	0.277451	1.54949	0.18657	0.956341	0.422015		2.00822	1.10778	45.0118	15.8968		1.81303	0.66645	2.17573	1.54713	1.55058	0.321635		2.32702	1.62833	10.1661	32.7779		1.76581	1.21294	0.06705	1.11038	1.03904	0.354528
2022/11/01 23:31:06	2022/11/20 23:33:25	3.40192	1.75145	11.9846	17.4758		2.86191	1.49159	0.97269	0.95409	1.57007	0.448265		2.10284	1.18626	16.4467	11.5797		1.81185	0.301974	1.55125	0.20391	0.967246	0.416302		2.00822	1.15127	45.0118	15.8968		1.81303	0.709938	2.17573	1.54713	1.56146	0.311703		2.32702	1.62833	10.1661	32.7779		1.76581	1.21294	0.06705	1.11038	1.03904	0.354528
2022/11/01 23:36:06	2022/11/20 23:38:25	3.40192	1.75145	11.9971	17.5086		2.86191	1.49159	0.98514	0.98688	1.58138	0.443166		2.10905	1.18626	16.4467	11.5986		1.81806	0.301974	1.55125	0.22279	0.973518	0.414486		2.00822	1.19148	45.0118	15.8968		1.81303	0.750146	2.17573	1.54713	1.57151	0.302579		2.32702	1.62833	10.1661	32.7779		1.76581	1.21294	0.06705	1.11038	1.03904	0.354528
2022/11/01 23:41:06	2022/11/20 23:43:25	3.40192	1.75145	11.9971	17.5435		2.86191	1.49159	0.98514	1.02179	1.59011	0.439332		2.1694	1.18626	16.4467	11.6156		1.87841	0.301974	1.55125	0.2398	0.992859	0.422338		2.00822	1.19962	45.0118	15.8968		1.81303	0.758281	2.17573	1.54713	1.57354	0.30074		2.32702	1.62833	10.1661	32.7779		1.76581	1.21294	0.06705	1.11038	1.03904	0.354528
2022/11/01 23:46:06	2022/11/20 23:48:25	3.40192	1.75145	11.9971	17.5784		2.86191	1.49159	0.98514	1.05669	1.59883	0.435641		2.17055	1.18626	16.4467	11.6256		1.87956	0.301974	1.55125	0.24979	0.995643	0.421058		2.00822	1.19962	45.0118	15.9394		1.81303	0.758281	2.17573	1.58975	1.5842	0.300616		2.32702	1.62878	10.1661	32.7779		1.76581	1.21338	0.06705	1.11038	1.03916	0.354547
2022/11/01 23:51:06	2022/11/20 23:53:25	3.40192	1.75145	11.9971	17.6101		2.86191	1.49159	0.98514	1.08844	1.60677	0.432409		2.21984	1.18626	16.4467	11.6327		1.92885	0.301974	1.55125	0.25688	1.00974	0.428732		2.00822	1.19962	45.0118	16.1741		1.81303	0.758281	2.17573	1.82444	1.64287	0.306643		2.32702	1.67415	10.1661	32.7779		1.76581	1.25876	0.06705	1.11038	1.0505	0.35658
2022/11/01 23:56:06	2022/11/20 23:58:25	3.40192	1.75145	11.9971	17.7767		2.86191	1.49159	0.98514	1.25504	1.64842	0.417517		2.27427	1.19029	16.4467	11.6327		1.98328	0.306004	1.55125	0.25688	1.02435	0.438008		2.00822	1.19962	45.0118	16.4322		1.81303	0.758281	2.17573	2.0825	1.70738	0.325579		2.32702	1.74778	10.1671	32.7779		1.76581	1.33239	0.06807	1.11038	1.06916	0.36038
2022/11/02 00:01:06	2022/11/21 00:03:25	3.40192	1.75145	11.9971	18.115		2.86191	1.49159	0.98514	1.59326	1.73297	0.399117		2.27693	1.19434	16.4467	11.6327		1.98594	0.31006	1.55125	0.25688	1.02603	0.437939		2.00822	1.19962	45.0118	16.6902		1.81303	0.758281	2.17573	2.34057	1.7719	0.355385		2.32702	1.78135	10.1722	32.7779		1.76581	1.36596	0.07311	1.11038	1.07881	0.361346
2022/11/02 00:06:06	2022/11/21 00:08:25	3.40192	1.75166	11.9971	18.1736		2.86191	1.4918	0.98514	1.65185	1.74768	0.397663		2.30124	1.19434	16.4467	11.6327		2.01025	0.31006	1.55125	0.25688	1.03211	0.442399		2.39638	1.19962	45.0118	16.8597		2.20119	0.758281	2.17573	2.5101	1.91133	0.391788		2.32702	1.85846	10.1733	32.7779		1.76581	1.44307	0.07426	1.11038	1.09838	0.366655
2022/11/02 00:11:06	2022/11/21 00:13:25	3.40192	1.79904	11.9971	18.1736		2.86191	1.53918	0.98514	1.65185	1.75952	0.395292		2.3301	1.19434	16.4467	11.6327		2.03911	0.31006	1.55125	0.25688	1.03933	0.447743		2.62599	1.19962	45.0118	16.8774		2.4308	0.758281	2.17573	2.52772	1.97313	0.411697		2.32702	1.89787	10.1799	32.7779		1.76581	1.48248	0.08091	1.11038	1.10989	0.368313
2022/11/02 00:16:06	2022/11/21 00:18:25	3.48486	1.8823	11.9971	18.1736		2.94485	1.62244	0.98514	1.65185	1.80107	0.411112		2.339	1.19434	16.4467	11.6327		2.04801	0.31006	1.55125	0.25688	1.04155	0.449401		2.62599	1.19962	45.0118	16.9052		2.4308	0.758281	2.17573	2.55556	1.98009	0.414869		2.32702	1.98547	10.1894	32.7779		1.76581	1.57008	0.09032	1.11038	1.13415	0.374073
2022/11/02 00:21:06	2022/11/21 00:23:25	3.48486	1.96555	11.9976	18.1736		2.94485	1.7057	0.98567	1.65185	1.82202	0.408526		2.339	1.19434	16.4467	11.6327		2.04801	0.31006	1.55125	0.25688	1.04155	0.449401		2.62599	1.19962	45.0118	16.9081		2.4308	0.758281	2.17573	2.55846	1.98082	0.415205		2.32702	2.06507	10.1898	32.7779		1.76581	1.64968	0.09071	1.11038	1.15414	0.382153
2022/11/02 00:26:06	2022/11/21 00:28:25	3.70518	2.04881	12.0018	18.1736		3.16517	1.78895	0.98983	1.65185	1.89895	0.456707		2.339	1.19434	16.4467	11.6327		2.04801	0.31006	1.55125	0.25688	1.04155	0.449401		2.62599	1.19962	45.0118	16.9081		2.4308	0.758281	2.17573	2.55846	1.98082	0.415205		2.32702	2.12949	10.1898	32.7779		1.76581	1.7141	0.09071	1.11038	1.17025	0.389385
2022/11/02 00:31:06	2022/11/21 00:33:25	3.88806	2.10225	12.0058	18.1736		3.34805	1.84239	0.99389	1.65185	1.95905	0.497395		2.339	1.19434	16.4467	11.6327		2.04801	0.31006	1.55125	0.25688	1.04155	0.449401		2.62599	1.19962	45.0118	16.9081		2.4308	0.758281	2.17573	2.55846	1.98082	0.415205		2.32702	2.22112	10.1898	32.8002		1.76581	1.80573	0.09071	1.13276	1.19875	0.400217
2022/11/02 00:36:06	2022/11/21 00:38:25	3.97727	2.11829	12.2387	18.1736		3.43726	1.85843	1.22681	1.65185	2.04359	0.482803		2.339	1.19434	16.4467	11.6327		2.04801	0.31006	1.55125	0.25688	1.04155	0.449401		2.62599	1.19962	45.0118	16.9081		2.4308	0.758281	2.17573	2.55846	1.98082	0.415205		2.32702	2.25448	10.1898	32.8483		1.76581	1.83909	0.09071	1.18079	1.2191	0.403939
2022/11/02 00:41:06	2022/11/21 00:43:25	4.02423	2.11878	12.2387	18.1736		3.48422	1.85892	1.22681	1.65185	2.05545	0.494093		2.339	1.19434	16.4467	11.6327		2.04801	0.31006	1.55125	0.25688	1.04155	0.449401		2.62599	1.19962	45.0139	16.9081		2.4308	0.758281	2.17787	2.55846	1.98135	0.415289		2.32702	2.25448	10.1898	32.8963		1.76581	1.83909	0.09071	1.22886	1.23112	0.403738
2022/11/02 00:46:06	2022/11/21 00:48:25	4.04578	2.11878	12.4251	18.1736		3.50577	1.85892	1.41316	1.65185	2.10743	0.474928		2.339	1.19434	16.4467	11.6327		2.04801	0.31006	1.55125	0.25688	1.04155	0.449401		2.62599	1.19962	45.0507	16.9081		2.4308	0.758281	2.21459	2.55846	1.99053	0.416835		2.32702	2.25448	10.1898	32.9444		1.76581	1.83909	0.09071	1.27692	1.24313	0.403894
2022/11/02 00:51:06	2022/11/21 00:53:25	4.04578	2.12509	12.426	18.177		3.50577	1.86523	1.41408	1.65533	2.1101	0.474265		2.339	1.19434	16.4467	11.6327		2.04801	0.31006	1.55125	0.25688	1.04155	0.449401		2.62599	1.23271	45.0507	16.9081		2.4308	0.791376	2.21459	2.55846	1.99881	0.408685		2.32702	2.26869	10.1898	32.9925		1.76581	1.8533	0.09071	1.32499	1.2587	0.40613
2022/11/02 00:56:06	2022/11/21 00:58:25	4.04578	2.13398	12.4364	18.1861		3.50577	1.87412	1.42444	1.66441	2.11719	0.47189		2.339	1.19434	16.4467	11.6392		2.04801	0.31006	1.55125	0.26335	1.04317	0.448461		2.62599	1.29362	45.0507	16.9081		2.4308	0.85229	2.21459	2.55846	2.01403	0.393696		2.36912	2.32293	10.1898	33.0372		1.80791	1.90754	0.09071	1.36968	1.29396	0.417748
2022/11/02 01:01:06	2022/11/21 01:03:25	4.04578	2.1372	12.442	18.1927		3.50577	1.87734	1.43007	1.671	2.12105	0.470536		2.339	1.19434	16.4467	11.6755		2.04801	0.31006	1.55125	0.29967	1.05225	0.44326		2.62599	1.31416	45.0507	16.9081		2.4308	0.872822	2.21459	2.55846	2.01917	0.388649		2.49467	2.37957	10.1898	33.0611		1.93346	1.96418	0.09071	1.39362	1.34549	0.4383
2022/11/02 01:06:06	2022/11/21 01:08:25	4.04578	2.1673	12.442	18.193		3.50577	1.90745	1.43007	1.67129	2.12865	0.469272		2.339	1.19434	16.4467	11.7047		2.04801	0.31006	1.55125	0.3289	1.05955	0.439166		2.62599	1.35145	45.0507	16.9081		2.4308	0.910112	2.21459	2.55846	2.02849	0.379487		2.62249	2.43622	10.1898	33.108		2.06128	2.02083	0.09071	1.44051	1.40333	0.459942
2022/11/02 01:11:06	2022/11/21 01:13:25	4.04578	2.1673	12.442	18.193		3.50577	1.90745	1.43007	1.67129	2.12865	0.469272		2.339	1.20228	16.4467	11.7082		2.04801	0.317998	1.55125	0.3324	1.06241	0.437553		2.62599	1.35567	45.0507	16.9081		2.4308	0.914341	2.21459	2.55846	2.02955	0.378448		2.7503	2.47375	10.1898	33.1561		2.18909	2.05836	0.09071	1.48857	1.45668	0.480046
2022/11/02 01:16:06	2022/11/21 01:18:25	4.04578	2.1673	12.442	18.193		3.50577	1.90745	1.43007	1.67129	2.12865	0.469272		2.339	1.22508	16.4467	11.7181		2.04801	0.340796	1.55125	0.34234	1.0706	0.432948		2.62599	1.35567	45.0507	16.9081		2.4308	0.914341	2.21459	2.55846	2.02955	0.378448		2.87812	2.47465	10.1898	33.2041		2.31691	2.05926	0.09071	1.53664	1.50088	0.497288
2022/11/02 01:21:06	2022/11/21 01:23:25	4.04578	2.1673	12.442	18.193		3.50577	1.90745	1.43007	1.67129	2.12865	0.469272		2.339	1.24822	16.4467	11.7391		2.04801	0.363934	1.55125	0.36329	1.08162	0.426764		2.62602	1.35567	45.0507	16.9081		2.43083	0.914341	2.21459	2.55846	2.02956	0.378451		2.99788	2.47465	10.1898	33.2522		2.43667	2.05926	0.09071	1.5847	1.54283	0.514462
2022/11/02 01:26:06	2022/11/21 01:28:25	4.04578	2.1673	12.442	18.193		3.50577	1.90745	1.43007	1.67129	2.12865	0.469272		2.339	1.27006	16.4467	11.7996		2.04801	0.385775	1.55125	0.42376	1.1022	0.415305		2.65706	1.35567	45.0507	16.9081		2.46187	0.914341	2.21459	2.55846	2.03732	0.381263		3.03426	2.47465	10.1898	33.3002		2.47305	2.05926	0.09071	1.63277	1.56395	0.520174
2022/11/02 01:31:06	2022/11/21 01:33:25	4.04578	2.1673	12.442	18.193		3.50577	1.90745	1.43007	1.67129	2.12865	0.469272		2.339	1.27517	16.4467	11.8119		2.04801	0.390891	1.55125	0.43605	1.10655	0.4129		2.6917	1.35567	45.0507	16.9081		2.49651	0.914341	2.21459	2.55846	2.04598	0.384562		3.04727	2.47465	10.1898	33.3483		2.48606	2.05926	0.09071	1.68083	1.57922	0.522716
2022/11/02 01:36:06	2022/11/21 01:38:25	4.04578	2.1673	12.442	18.193		3.50577	1.90745	1.43007	1.67129	2.12865	0.469272		2.339	1.27517	16.4467	11.8119		2.04801	0.390891	1.55125	0.43605	1.10655	0.4129		2.70152	1.35567	45.0507	16.9081		2.50633	0.914341	2.21459	2.55846	2.04843	0.385526		3.08202	2.47465	10.1898	33.3964		2.52081	2.05926	0.09071	1.7289	1.59992	0.528629
2022/11/02 01:41:06	2022/11/21 01:43:25	4.04578	2.1673	12.442	18.193		3.50577	1.90745	1.43007	1.67129	2.12865	0.469272		2.339	1.27517	16.4467	11.8119		2.04801	0.390891	1.55125	0.43605	1.10655	0.4129		2.7558	1.35567	45.0507	16.9081		2.56061	0.914341	2.21459	2.55846	2.062	0.391098		3.13899	2.47465	10.1898	33.4375		2.57778	2.05926	0.09071	1.77	1.62444	0.537854
2022/11/02 01:46:06	2022/11/21 01:48:25	4.04578	2.1673	12.4436	18.193		3.50577	1.90745	1.43163	1.67129	2.12904	0.469078		2.339	1.27517	16.4467	11.8119		2.04801	0.390891	1.55125	0.43605	1.10655	0.4129		2.75965	1.35567	45.0507	16.9081		2.56446	0.914341	2.21459	2.55846	2.06296	0.391507		3.1552	2.47465	10.1898	33.4426		2.59399	2.05926	0.09071	1.77512	1.62977	0.540371
2022/11/02 01:51:06	2022/11/21 01:53:25	4.04578	2.1673	12.4452	18.193		3.50577	1.90745	1.43329	1.67129	2.12945	0.468873		2.339	1.27517	16.4467	11.8119		2.04801	0.390891	1.55125	0.43605	1.10655	0.4129		2.76073	1.35567	45.0507	16.9081		2.56554	0.914341	2.21459	2.55846	2.06323	0.391623		3.1552	2.47465	10.1898	33.4426		2.59399	2.05926	0.09077	1.77512	1.62978	0.540357
2022/11/02 01:56:06	2022/11/21 01:58:25	4.04578	2.1673	12.4452	18.2175		3.50577	1.90745	1.43329	1.69582	2.13558	0.466911		2.339	1.27517	16.4467	11.8119		2.04801	0.390891	1.55125	0.43605	1.10655	0.4129		2.76087	1.35567	45.0507	16.9081		2.56568	0.914341	2.21459	2.55846	2.06327	0.391638		3.15628	2.47465	10.1916	33.4426		2.59507	2.05926	0.09253	1.77512	1.63049	0.5401
2022/11/02 02:01:06	2022/11/21 02:03:25	4.04578	2.1673	12.4452	18.289		3.50577	1.90745	1.43329	1.76734	2.15346	0.46161		2.339	1.27517	16.4467	11.8119		2.04801	0.390891	1.55125	0.43605	1.10655	0.4129		2.76087	1.35567	45.0857	16.9081		2.56568	0.914341	2.24961	2.55846	2.07202	0.392861		3.16194	2.47465	10.1941	33.4426		2.60073	2.05926	0.0951	1.77512	1.63255	0.540335
2022/11/02 02:06:06	2022/11/21 02:08:25	4.04578	2.1673	12.4452	18.3617		3.50577	1.90745	1.43329	1.84001	2.17163	0.456878		2.339	1.27517	16.4467	11.8119		2.04801	0.390891	1.55125	0.43605	1.10655	0.4129		2.76087	1.35567	45.1656	16.9081		2.56568	0.914341	2.32955	2.55846	2.09201	0.396365		3.16194	2.47465	10.1967	33.4426		2.60073	2.05926	0.09768	1.77512	1.6332	0.539723
2022/11/02 02:11:06	2022/11/21 02:13:25	4.05485	2.1673	12.4452	18.4175		3.51484	1.90745	1.43329	1.8958	2.18785	0.455905		2.339	1.27517	16.4467	11.8119		2.04801	0.390891	1.55125	0.43605	1.10655	0.4129		2.76087	1.35567	45.2296	16.9081		2.56568	0.914341	2.3935	2.55846	2.108	0.399866		3.16194	2.47465	10.1993	33.4426		2.60073	2.05926	0.10025	1.77512	1.63384	0.539114
2022/11/02 02:16:06	2022/11/21 02:18:25	4.18076	2.1673	12.4452	18.4212		3.64075	1.90745	1.43329	1.89948	2.22024	0.486301		2.339	1.27517	16.4496	11.8119		2.04801	0.390891	1.55423	0.43605	1.10729	0.413168		2.76087	1.35567	45.2349	16.9081		2.56568	0.914341	2.39884	2.55846	2.10933	0.400186		3.16194	2.47907	10.2015	33.4426		2.60073	2.06368	0.10251	1.77512	1.63551	0.53887
2022/11/02 02:21:06	2022/11/21 02:23:25	4.34241	2.1673	12.4452	18.4212		3.8024	1.90745	1.43329	1.89948	2.26065	0.52573		2.339	1.27517	16.4586	11.8119		2.04801	0.390891	1.56315	0.43605	1.10952	0.413977		2.76087	1.35567	45.2349	16.9081		2.56568	0.914341	2.39884	2.55846	2.10933	0.400186		3.16194	2.49659	10.2019	33.4426		2.60073	2.0812	0.10283	1.77512	1.63997	0.53997
2022/11/02 02:26:06	2022/11/21 02:28:25	4.48234	2.1673	12.4452	18.4369		3.94233	1.90745	1.43329	1.91517	2.29956	0.559064		2.339	1.29142	16.46	11.8119		2.04801	0.407135	1.56457	0.43605	1.11394	0.41177		2.76087	1.35567	45.2349	16.9081		2.56568	0.914341	2.39884	2.55846	2.10933	0.400186		3.16194	2.50315	10.2019	33.4426		2.60073	2.08776	0.10283	1.77512	1.64161	0.540419
2022/11/02 02:31:06	2022/11/21 02:33:25	4.57273	2.1673	12.4452	18.5248		4.03271	1.90745	1.43329	2.00312	2.34414	0.576478		2.339	1.33035	16.4785	11.8119		2.04801	0.446071	1.58305	0.43605	1.12829	0.407973		2.76087	1.35567	45.2349	16.9081		2.56568	0.914341	2.39884	2.55846	2.10933	0.400186		3.16194	2.50315	10.2019	33.4426		2.60073	2.08776	0.10283	1.77512	1.64161	0.540419
2022/11/02 02:36:06	2022/11/21 02:38:25	4.62901	2.1673	12.4452	18.5538		4.089	1.90745	1.43329	2.03208	2.36545	0.588815		2.339	1.36944	16.5015	11.8119		2.04801	0.48516	1.60614	0.43605	1.14384	0.40477		2.76087	1.35567	45.2349	16.9081		2.56568	0.914341	2.39884	2.55846	2.10933	0.400186		3.16194	2.50315	10.2019	33.4426		2.60073	2.08776	0.10283	1.77512	1.64161	0.540419
2022/11/02 02:41:06	2022/11/21 02:43:25	4.62977	2.1673	12.4452	18.5538		4.08976	1.90745	1.43329	2.03208	2.36564	0.589		2.339	1.40853	16.5095	11.8143		2.04801	0.524249	1.61405	0.43853	1.15621	0.399933		2.76087	1.35567	45.2349	16.9081		2.56568	0.914341	2.39884	2.55846	2.10933	0.400186		3.16194	2.50315	10.2019	33.4426		2.60073	2.08776	0.10283	1.77512	1.64161	0.540419
2022/11/02 02:46:06	2022/11/21 02:48:25	4.66797	2.1673	12.4452	18.5538		4.12796	1.90745	1.43329	2.03208	2.37519	0.598322		2.339	1.44762	16.5095	11.8314		2.04801	0.563337	1.61405	0.4556	1.17025	0.392267		2.76087	1.35567	45.2349	16.9081		2.56568	0.914341	2.39884	2.55846	2.10933	0.400186		3.16194	2.50315	10.2019	33.4426		2.60073	2.08776	0.10283	1.77512	1.64161	0.540419
2022/11/02 02:51:06	2022/11/21 02:53:25	4.66801	2.17265	12.4452	18.5538		4.128	1.91279	1.43329	2.03208	2.37654	0.597986		2.339	1.47425	16.5095	11.8462		2.04801	0.58997	1.61405	0.4704	1.18061	0.386598		2.76087	1.35567	45.2349	16.9081		2.56568	0.914341	2.39884	2.55846	2.10933	0.400186		3.16194	2.50315	10.2019	33.4426		2.60073	2.08776	0.10283	1.77512	1.64161	0.540419
2022/11/02 02:56:06	2022/11/21 02:58:25	4.66801	2.20838	12.4452	18.5538		4.128	1.94852	1.43329	2.03208	2.38547	0.595739		2.36287	1.47504	16.5095	11.8641		2.07188	0.590764	1.61405	0.48829	1.19125	0.388266		2.76087	1.35567	45.2349	16.9081		2.56568	0.914341	2.39884	2.55846	2.10933	0.400186		3.16194	2.50315	10.2019	33.4426		2.60073	2.08776	0.10283	1.77512	1.64161	0.540419
2022/11/02 03:01:06	2022/11/21 03:03:25	4.66801	2.20838	12.4452	18.5538		4.128	1.94852	1.43329	2.03208	2.38547	0.595739		2.50019	1.47504	16.5095	11.9147		2.2092	0.590764	1.61405	0.53887	1.23822	0.407465		2.76087	1.35567	45.2349	16.9081		2.56568	0.914341	2.39884	2.55846	2.10933	0.400186		3.16194	2.50315	10.2019	33.4426		2.60073	2.08776	0.10283	1.77512	1.64161	0.540419
2022/11/02 03:06:06	2022/11/21 03:08:25	4.66801	2.20838	12.4452	18.5538		4.128	1.94852	1.43329	2.03208	2.38547	0.595739		2.56246	1.47504	16.5095	11.9397		2.27147	0.590764	1.61405	0.56385	1.26003	0.416426		2.76087	1.35567	45.2447	16.9081		2.56568	0.914341	2.40863	2.55846	2.11178	0.400783		3.16194	2.50315	10.2019	33.4426		2.60073	2.08776	0.10283	1.77512	1.64161	0.540419
2022/11/02 03:11:06	2022/11/21 03:13:25	4.66801	2.20838	12.4452	18.5538		4.128	1.94852	1.43329	2.03208	2.38547	0.595739		2.56246	1.47504	16.5095	11.9397		2.27147	0.590764	1.61405	0.56385	1.26003	0.416426		2.76087	1.35567	45.305	16.9081		2.56568	0.914341	2.46895	2.55846	2.12686	0.40477		3.16194	2.50315	10.2019	33.4928		2.60073	2.08776	0.10283	1.82528	1.65415	0.541596
2022/11/02 03:16:06	2022/11/21 03:18:25	4.66801	2.20838	12.4452	18.5538		4.128	1.94852	1.43329	2.03208	2.38547	0.595739		2.56246	1.47504	16.5095	11.9397		2.27147	0.590764	1.61405	0.56385	1.26003	0.416426		2.76087	1.35567	45.3725	16.9081		2.56568	0.914341	2.53647	2.55846	2.14374	0.409846		3.16194	2.50315	10.2019	33.5005		2.60073	2.08776	0.10283	1.83299	1.65608	0.541802
2022/11/02 03:21:06	2022/11/21 03:23:25	4.66801	2.20838	12.4523	18.5538		4.128	1.94852	1.4404	2.03208	2.38725	0.594794		2.56246	1.47504	16.5095	11.9397		2.27147	0.590764	1.61405	0.56385	1.26003	0.416426		2.76842	1.35567	45.4389	16.9081		2.57323	0.914341	2.60279	2.55846	2.16221	0.416057		3.16194	2.50315	10.2019	33.5005		2.60073	2.08776	0.10283	1.83299	1.65608	0.541802
2022/11/02 03:26:06	2022/11/21 03:28:25	4.66801	2.20838	12.4584	18.5538		4.128	1.94852	1.44646	2.03208	2.38877	0.593991		2.56246	1.49679	16.5095	11.9397		2.27147	0.612508	1.61405	0.56385	1.26547	0.41354		2.87321	1.35567	45.4611	16.9081		2.67802	0.914341	2.62503	2.55846	2.19396	0.427241		3.16194	2.50315	10.2019	33.5005		2.60073	2.08776	0.10283	1.83299	1.65608	0.541802
2022/11/02 03:31:06	2022/11/21 03:33:25	4.66801	2.20838	12.4584	18.5538		4.128	1.94852	1.44646	2.03208	2.38877	0.593991		2.56246	1.56212	16.5095	11.9397		2.27147	0.67784	1.61405	0.56385	1.2818	0.405181		3.0051	1.35567	45.4611	16.9081		2.80991	0.914341	2.62503	2.55846	2.22694	0.440753		3.16194	2.50315	10.2019	33.5005		2.60073	2.08776	0.10283	1.83299	1.65608	0.541802
2022/11/02 03:36:06	2022/11/21 03:38:25	4.66801	2.20838	12.4584	18.5538		4.128	1.94852	1.44646	2.03208	2.38877	0.593991		2.56246	1.62357	16.5095	11.9397		2.27147	0.73929	1.61405	0.56385	1.29717	0.397772		3.04834	1.35567	45.4611	16.9081		2.85315	0.914341	2.62503	2.55846	2.23774	0.445624		3.16194	2.50315	10.2019	33.5005		2.60073	2.08776	0.10283	1.83299	1.65608	0.541802
2022/11/02 03:41:06	2022/11/21 03:43:25	4.66801	2.20838	12.4584	18.5538		4.128	1.94852	1.44646	2.03208	2.38877	0.593991		2.56246	1.63589	16.5095	11.9417		2.27147	0.751605	1.61405	0.56593	1.30076	0.39602		3.04834	1.35567	45.4611	16.9081		2.85315	0.914341	2.62503	2.55846	2.23774	0.445624		3.16194	2.55873	10.2019	33.5005		2.60073	2.14334	0.10283	1.83299	1.66997	0.545657
2022/11/02 03:46:06	2022/11/21 03:48:25	4.66801	2.20838	12.4584	18.5538		4.128	1.94852	1.44646	2.03208	2.38877	0.593991		2.56246	1.63589	16.5095	11.95		2.27147	0.751605	1.61405	0.57421	1.30283	0.394743		3.04834	1.35567	45.4611	16.9081		2.85315	0.914341	2.62503	2.55846	2.23774	0.445624		3.16194	2.71369	10.2019	33.5005		2.60073	2.2983	0.10283	1.83299	1.70871	0.558094
2022/11/02 03:51:06	2022/11/21 03:53:25	4.71268	2.20838	12.4584	18.5538		4.17267	1.94852	1.44646	2.03208	2.39993	0.604897		2.56246	1.63589	16.5095	11.9529		2.27147	0.751605	1.61405	0.57713	1.30356	0.394294		3.04834	1.35701	45.4611	16.9081		2.85315	0.915672	2.62503	2.55846	2.23808	0.445294		3.16194	2.85035	10.2051	33.5005		2.60073	2.43495	0.10607	1.83299	1.74369	0.570244
2022/11/02 03:56:06	2022/11/21 03:58:25	4.71955	2.20838	12.4584	18.5538		4.17954	1.94852	1.44646	2.03208	2.40165	0.606575		2.56246	1.63589	16.5095	11.9529		2.27147	0.751605	1.61405	0.57713	1.30356	0.394294		3.04834	1.38528	45.4611	16.9081		2.85315	0.94395	2.62503	2.55846	2.24515	0.438297		3.16194	3.08263	10.2117	33.5005		2.60073	2.66724	0.11265	1.83299	1.8034	0.594521
2022/11/02 04:01:06	2022/11/21 04:03:25	4.71955	2.20838	12.4584	18.5538		4.17954	1.94852	1.44646	2.03208	2.40165	0.606575		2.56246	1.63589	16.5095	11.9529		2.27147	0.751605	1.61405	0.57713	1.30356	0.394294		3.04834	1.42416	45.4611	16.9081		2.85315	0.982824	2.62503	2.55846	2.25487	0.428682		3.16194	3.13052	10.2175	33.5005		2.60073	2.71513	0.11845	1.83299	1.81682	0.599041
2022/11/02 04:06:06	2022/11/21 04:08:25	4.71955	2.20838	12.4584	18.5538		4.17954	1.94852	1.44646	2.03208	2.40165	0.606575		2.56246	1.63589	16.5095	11.9529		2.27147	0.751605	1.61405	0.57713	1.30356	0.394294		3.04834	1.46303	45.4947	16.9081		2.85315	1.0217	2.65865	2.55846	2.27299	0.421558		3.16194	3.13052	10.2184	33.5032		2.60073	2.71513	0.11932	1.83572	1.81772	0.598842
2022/11/02 04:11:06	2022/11/21 04:13:25	4.71955	2.2109	12.4584	18.5844		4.17954	1.95104	1.44646	2.06272	2.40994	0.604907		2.56246	1.63589	16.5095	11.9529		2.27147	0.751605	1.61405	0.57713	1.30356	0.394294		3.05299	1.49348	45.9883	16.9081		2.8578	1.05215	3.15228	2.55846	2.40517	0.467013		3.16194	3.13052	10.2184	33.5751		2.60073	2.71513	0.11932	1.90758	1.83569	0.599291
2022/11/02 04:16:06	2022/11/21 04:18:25	4.72089	2.21449	12.4584	18.6692		4.18088	1.95463	1.44646	2.14752	2.43237	0.601296		2.56246	1.63589	16.5095	11.9529		2.27147	0.751605	1.61405	0.57713	1.30356	0.394294		3.14506	1.49575	46.0494	16.9081		2.94987	1.05442	3.21335	2.55846	2.44402	0.482342		3.16194	3.13052	10.2184	33.5752		2.60073	2.71513	0.11932	1.9077	1.83572	0.599292
2022/11/02 04:21:06	2022/11/21 04:23:25	4.80158	2.21449	12.4584	18.7296		4.26157	1.95463	1.44646	2.20787	2.46763	0.618577		2.56246	1.63589	16.5177	11.9529		2.27147	0.751605	1.62227	0.57713	1.30562	0.394839		3.17667	1.49575	46.0494	16.9081		2.98148	1.05442	3.21335	2.55846	2.45193	0.485161		3.16194	3.13052	10.2184	33.5793		2.60073	2.71513	0.11932	1.91179	1.83674	0.599334
2022/11/02 04:26:06	2022/11/21 04:28:25	4.92875	2.21449	12.4584	18.7359		4.38874	1.95463	1.44646	2.2142	2.50101	0.649128		2.58103	1.65203	16.5439	11.9529		2.29004	0.767745	1.64852	0.57713	1.32086	0.398513		3.17667	1.49575	46.0494	16.9081		2.98148	1.05442	3.21335	2.55846	2.45193	0.485161		3.16194	3.13052	10.2201	33.6074		2.60073	2.71513	0.12101	1.9399	1.84419	0.599263
2022/11/02 04:31:06	2022/11/21 04:33:25	5.00724	2.21449	12.4584	18.7406		4.46723	1.95463	1.44646	2.21889	2.5218	0.667988		2.62343	1.6899	16.5696	11.9529		2.33244	0.805616	1.67425	0.57713	1.34736	0.404556		3.17667	1.49575	46.0613	16.9081		2.98148	1.05442	3.2252	2.55846	2.45489	0.486717		3.19456	3.13052	10.2326	33.6394		2.63335	2.71513	0.13352	1.97195	1.86349	0.600176
2022/11/02 04:36:06	2022/11/21 04:38:25	5.00824	2.21449	12.4584	18.7426		4.46823	1.95463	1.44646	2.22085	2.52254	0.668155		2.65823	1.70217	16.5822	11.9529		2.36724	0.817889	1.68677	0.57713	1.36226	0.411102		3.17667	1.49575	46.0937	16.9081		2.98148	1.05442	3.25766	2.55846	2.463	0.491046		3.25915	3.13052	10.2394	33.6715		2.69794	2.71513	0.14041	2.00399	1.88937	0.606056
2022/11/02 04:41:06	2022/11/21 04:43:25	5.00824	2.21449	12.4584	18.7426		4.46823	1.95463	1.44646	2.22085	2.52254	0.668155		2.6616	1.70217	16.614	11.9529		2.37061	0.817889	1.71857	0.57713	1.37105	0.413943		3.17667	1.49575	46.0941	16.9081		2.98148	1.05442	3.25803	2.55846	2.4631	0.491096		3.32374	3.13052	10.2394	33.6964		2.76253	2.71513	0.14041	2.02893	1.91175	0.613773
2022/11/02 04:46:06	2022/11/21 04:48:25	5.00824	2.21449	12.4584	18.7426		4.46823	1.95463	1.44646	2.22085	2.52254	0.668155		2.6616	1.70217	16.6431	11.9609		2.37061	0.817889	1.74767	0.58507	1.38031	0.414766		3.17667	1.49575	46.0941	16.9081		2.98148	1.05442	3.25803	2.55846	2.4631	0.491096		3.37475	3.13052	10.2394	33.7208		2.81354	2.71513	0.14041	2.05329	1.93059	0.620141
2022/11/02 04:51:06	2022/11/21 04:53:25	5.00824	2.21449	12.4584	18.7426		4.46823	1.95463	1.44646	2.22085	2.52254	0.668155		2.6616	1.70217	16.6527	11.977		2.37061	0.817889	1.7573	0.60119	1.38675	0.412916		3.17667	1.49575	46.0941	16.9081		2.98148	1.05442	3.25803	2.55846	2.4631	0.491096		3.37874	3.16198	10.2394	33.7588		2.81753	2.74659	0.14041	2.09128	1.94895	0.624615
2022/11/02 04:56:06	2022/11/21 04:58:25	5.00824	2.21449	12.4605	18.7426		4.46823	1.95463	1.44858	2.22085	2.52307	0.667871		2.6616	1.70217	16.6653	11.9818		2.37061	0.817889	1.76988	0.606	1.39109	0.413104		3.17667	1.49575	46.0941	16.9081		2.98148	1.05442	3.25803	2.55846	2.4631	0.491096		3.37874	3.16198	10.2394	33.8271		2.81753	2.74659	0.14041	2.15963	1.96604	0.626145
2022/11/02 05:01:06	2022/11/21 05:03:25	5.00824	2.21449	12.4662	18.7426		4.46823	1.95463	1.45423	2.22085	2.52448	0.667115		2.6616	1.70217	16.6846	11.9818		2.37061	0.817889	1.78917	0.606	1.39592	0.414604		3.17667	1.5015	46.0941	16.9121		2.98148	1.06017	3.25803	2.56245	2.46553	0.489787		3.37874	3.20085	10.2394	33.8373		2.81753	2.78546	0.14041	2.16979	1.9783	0.630498
2022/11/02 05:06:06	2022/11/21 05:08:25	5.00824	2.21449	12.468	18.7426		4.46823	1.95463	1.45606	2.22085	2.52494	0.66687		2.6616	1.70217	16.6919	11.9818		2.37061	0.817889	1.7965	0.606	1.39775	0.415187		3.17667	1.54107	46.0941	16.9167		2.98148	1.09974	3.25803	2.56707	2.47658	0.480405		3.38279	3.32423	10.2394	33.8522		2.82158	2.90884	0.14041	2.1847	2.01388	0.645007
2022/11/02 05:11:06	2022/11/21 05:13:25	5.00824	2.21449	12.468	18.7429		4.46823	1.95463	1.45606	2.22122	2.52503	0.666856		2.6616	1.70217	16.6919	11.9826		2.37061	0.817889	1.7965	0.60682	1.39795	0.415056		3.18073	1.58617	46.0941	16.9167		2.98554	1.14484	3.25803	2.56707	2.48887	0.470003		3.40357	3.36859	10.2394	33.8554		2.84236	2.9532	0.14041	2.18787	2.03096	0.652412
2022/11/02 05:16:06	2022/11/21 05:18:25	5.00824	2.21449	12.4695	18.7646		4.46823	1.95463	1.45762	2.24295	2.53086	0.665843		2.6616	1.70217	16.6919	12.0147		2.37061	0.817889	1.7965	0.63892	1.40598	0.410005		3.21132	1.63047	46.1181	16.9167		3.01613	1.18913	3.28199	2.56707	2.51358	0.465477		3.42617	3.38089	10.2394	33.9064		2.86496	2.9655	0.14041	2.23892	2.05245	0.657299
2022/11/02 05:21:06	2022/11/21 05:23:25	5.00824	2.21449	12.4741	18.7787		4.46823	1.95463	1.4622	2.25701	2.53552	0.664728		2.6616	1.70217	16.6919	12.0583		2.37061	0.817889	1.7965	0.68251	1.41688	0.403299		3.22555	1.64532	46.1661	16.9167		3.03036	1.20399	3.33005	2.56707	2.53287	0.469937		3.44877	3.38089	10.2394	34.0519		2.88756	2.9655	0.14041	2.38446	2.09448	0.663961
2022/11/02 05:26:06	2022/11/21 05:28:25	5.00824	2.21449	12.4741	18.7787		4.46823	1.95463	1.4622	2.25701	2.53552	0.664728		2.6616	1.70217	16.6919	12.0698		2.37061	0.817889	1.7965	0.69403	1.41976	0.401557		3.22555	1.65926	46.2142	16.9167		3.03036	1.21793	3.37812	2.56707	2.54837	0.47357		3.46715	3.38089	10.2394	34.1716		2.90594	2.9655	0.14041	2.50417	2.129	0.670733
2022/11/02 05:31:06	2022/11/21 05:33:25	5.00824	2.21449	12.4741	18.7787		4.46823	1.95463	1.4622	2.25701	2.53552	0.664728		2.6616	1.70217	16.6919	12.0811		2.37061	0.817889	1.7965	0.70529	1.42257	0.399868		3.22555	1.68239	46.2569	16.9167		3.03036	1.24106	3.42083	2.56707	2.56483	0.474503		3.47209	3.38089	10.2394	34.1826		2.91088	2.9655	0.14041	2.51511	2.13298	0.671725
2022/11/02 05:36:06	2022/11/21 05:38:25	5.00824	2.21449	12.4741	18.7787		4.46823	1.95463	1.4622	2.25701	2.53552	0.664728		2.6616	1.70217	16.6919	12.0823		2.37061	0.817889	1.7965	0.70649	1.42287	0.399688		3.22555	1.68247	46.286	16.9167		3.03036	1.24113	3.44995	2.56707	2.57213	0.478899		3.50064	3.38089	10.2414	34.1826		2.93943	2.9655	0.14239	2.51511	2.14061	0.674023
2022/11/02 05:41:06	2022/11/21 05:43:25	5.01326	2.21449	12.4741	18.7787		4.47325	1.95463	1.4622	2.25701	2.53677	0.665946		2.6616	1.70217	16.6919	12.0823		2.37061	0.817889	1.7965	0.70649	1.42287	0.399688		3.22555	1.68247	46.3565	16.9167		3.03036	1.24113	3.52043	2.56707	2.58975	0.489863		3.56158	3.38089	10.246	34.1826		3.00037	2.9655	0.14696	2.51511	2.15698	0.679058
2022/11/02 05:46:06	2022/11/21 05:48:25	5.0433	2.21449	12.4741	18.7787		4.50329	1.95463	1.4622	2.25701	2.54428	0.673227		2.6616	1.70217	16.6919	12.0823		2.37061	0.817889	1.7965	0.70649	1.42287	0.399688		3.22555	1.68247	46.4062	16.9167		3.03036	1.24113	3.57013	2.56707	2.60217	0.497825		3.62161	3.39265	10.2506	34.1826		3.0604	2.97725	0.15154	2.51511	2.17608	0.68542
2022/11/02 05:51:06	2022/11/21 05:53:25	5.0433	2.23332	12.4741	18.7787		4.50329	1.97346	1.4622	2.25701	2.54899	0.671868		2.6616	1.70217	16.6919	12.0823		2.37061	0.817889	1.7965	0.70649	1.42287	0.399688		3.22555	1.68247	46.4078	16.9167		3.03036	1.24113	3.57174	2.56707	2.60258	0.498086		3.6419	3.40387	10.2539	34.1826		3.08069	2.98848	0.15487	2.51511	2.18479	0.687885
2022/11/02 05:56:06	2022/11/21 05:58:25	5.0433	2.24004	12.4748	18.7787		4.50329	1.98019	1.46292	2.25701	2.55085	0.671292		2.6616	1.70247	16.6919	12.0823		2.37061	0.818194	1.7965	0.70649	1.42295	0.39965		3.2282	1.68247	46.4176	16.9168		3.03301	1.24113	3.5815	2.56715	2.6057	0.499859		3.6419	3.416	10.2573	34.1826		3.08069	3.00061	0.15827	2.51511	2.18867	0.688236
2022/11/02 06:01:06	2022/11/21 06:03:25	5.0433	2.24004	12.4771	18.7787		4.50329	1.98019	1.46517	2.25701	2.55141	0.670989		2.6616	1.72783	16.6919	12.0823		2.37061	0.843545	1.7965	0.70649	1.42929	0.396491		3.30147	1.68247	46.5423	16.9202		3.10628	1.24113	3.70624	2.57055	2.65605	0.525588		3.6419	3.48275	10.278	34.1826		3.08069	3.06736	0.17898	2.51511	2.21054	0.689886
2022/11/02 06:06:06	2022/11/21 06:08:25	5.0433	2.24004	12.4794	18.7787		4.50329	1.98019	1.46745	2.25701	2.55198	0.670681		2.6616	1.7691	16.6919	12.0823		2.37061	0.884815	1.7965	0.70649	1.4396	0.391513		3.39139	1.68247	46.7002	16.9251		3.19619	1.24113	3.86417	2.57545	2.71924	0.558557		3.6419	3.52006	10.2804	34.1826		3.08069	3.10466	0.18139	2.51511	2.22046	0.693208
2022/11/02 06:11:06	2022/11/21 06:13:25	5.0433	2.24004	12.4811	18.7787		4.50329	1.98019	1.46916	2.25701	2.55241	0.670451		2.6616	1.81026	16.6919	12.0823		2.37061	0.92598	1.7965	0.70649	1.44989	0.386758		3.40287	1.69318	46.8544	16.9263		3.20768	1.25184	4.01833	2.57668	2.76363	0.583945		3.6419	3.52008	10.2804	34.1826		3.08069	3.10469	0.18139	2.51511	2.22047	0.69321
2022/11/02 06:16:06	2022/11/21 06:18:25	5.0433	2.24004	12.4812	18.7787		4.50329	1.98019	1.46925	2.25701	2.55243	0.670439		2.6616	1.82804	16.6919	12.0823		2.37061	0.943763	1.7965	0.70649	1.45434	0.384771		3.4172	1.74818	46.9026	16.9263		3.22201	1.30685	4.06658	2.57668	2.79303	0.581772		3.6419	3.55263	10.2804	34.1826		3.08069	3.13724	0.18139	2.51511	2.22861	0.696709
2022/11/02 06:21:06	2022/11/21 06:23:25	5.0433	2.24004	12.4812	18.7797		4.50329	1.98019	1.46925	2.25795	2.55267	0.670404		2.6616	1.82804	16.6919	12.0823		2.37061	0.943763	1.7965	0.70649	1.45434	0.384771		3.43839	1.80801	46.9026	16.9263		3.2432	1.36668	4.06658	2.57668	2.81328	0.570397		3.6419	3.59808	10.2804	34.1826		3.08069	3.18269	0.18139	2.51511	2.23997	0.701724
2022/11/02 06:26:06	2022/11/21 06:28:25	5.0433	2.24004	12.4812	18.8076		4.50329	1.98019	1.46925	2.28589	2.55965	0.669416		2.6616	1.82804	16.6919	12.0823		2.37061	0.943763	1.7965	0.70649	1.45434	0.384771		3.43839	1.86735	46.9026	16.9263		3.2432	1.42602	4.06658	2.57668	2.82812	0.557912		3.6419	3.60042	10.2804	34.1826		3.08069	3.18502	0.18139	2.51511	2.24055	0.701985
2022/11/02 06:31:06	2022/11/21 06:33:25	5.0433	2.24004	12.4812	18.8244		4.50329	1.98019	1.46925	2.30265	2.56384	0.668858		2.6616	1.82804	16.6919	12.0823		2.37061	0.943763	1.7965	0.70649	1.45434	0.384771		3.43839	1.89008	46.9026	16.9263		3.2432	1.44875	4.06658	2.57668	2.8338	0.553161		3.6419	3.60042	10.2804	34.1826		3.08069	3.18502	0.18139	2.51511	2.24055	0.701985
2022/11/02 06:36:06	2022/11/21 06:38:25	5.0433	2.24004	12.4812	18.8244		4.50329	1.98019	1.46925	2.30265	2.56384	0.668858		2.6616	1.82804	16.6919	12.0823		2.37061	0.943763	1.7965	0.70649	1.45434	0.384771		3.43839	1.89008	46.9026	16.9263		3.2432	1.44875	4.06658	2.57668	2.8338	0.553161		3.6419	3.60042	10.2804	34.1826		3.08069	3.18502	0.18139	2.51511	2.24055	0.701985
2022/11/02 06:41:06	2022/11/21 06:43:25	5.0433	2.24004	12.4812	18.8244		4.50329	1.98019	1.46925	2.30265	2.56384	0.668858		2.66214	1.82804	16.6919	12.0823		2.37115	0.943763	1.7965	0.70649	1.45448	0.384879		3.43839	1.89008	46.9026	16.9263		3.2432	1.44875	4.06658	2.57668	2.8338	0.553161		3.6419	3.60042	10.2804	34.1826		3.08069	3.18502	0.18139	2.51511	2.24055	0.701985
2022/11/02 06:46:06	2022/11/21 06:48:25	5.0433	2.24004	12.4812	18.8244		4.50329	1.98019	1.46925	2.30265	2.56384	0.668858		2.68992	1.82804	16.6919	12.0823		2.39893	0.943763	1.7965	0.70649	1.46142	0.390416		3.43839	1.89008	46.9026	16.9263		3.2432	1.44875	4.06658	2.57668	2.8338	0.553161		3.6419	3.60042	10.2804	34.1826		3.08069	3.18502	0.18139	2.51511	2.24055	0.701985
2022/11/02 06:51:06	2022/11/21 06:53:25	5.0433	2.24004	12.4812	18.8244		4.50329	1.98019	1.46925	2.30265	2.56384	0.668858		2.69503	1.82804	16.6919	12.0823		2.40404	0.943763	1.7965	0.70649	1.4627	0.391439		3.43839	1.91185	46.9026	16.9263		3.2432	1.47051	4.06658	2.57668	2.83924	0.548627		3.6419	3.60042	10.2804	34.1826		3.08069	3.18502	0.18139	2.51511	2.24055	0.701985
2022/11/02 06:56:06	2022/11/21 06:58:25	5.0433	2.24004	12.4812	18.8244		4.50329	1.98019	1.46925	2.30265	2.56384	0.668858		2.69503	1.82804	16.6919	12.0823		2.40404	0.943763	1.7965	0.70649	1.4627	0.391439		3.43839	1.9583	46.9026	16.9263		3.2432	1.51696	4.06658	2.57668	2.85086	0.539008		3.6419	3.60042	10.2804	34.1826		3.08069	3.18502	0.18139	2.51511	2.24055	0.701985
2022/11/02 07:01:06	2022/11/21 07:03:25	5.0433	2.24004	12.4812	18.8244		4.50329	1.98019	1.46925	2.30265	2.56384	0.668858		2.69503	1.82804	16.6919	12.0823		2.40404	0.943763	1.7965	0.70649	1.4627	0.391439		3.43839	1.99174	46.9026	16.9263		3.2432	1.55041	4.06658	2.57668	2.85922	0.532132		3.6419	3.60042	10.2804	34.1826		3.08069	3.18502	0.18139	2.51511	2.24055	0.701985
2022/11/02 07:06:06	2022/11/21 07:08:25	5.0433	2.24004	12.4812	18.8244		4.50329	1.98019	1.46925	2.30265	2.56384	0.668858		2.69503	1.82804	16.6919	12.0823		2.40404	0.943763	1.7965	0.70649	1.4627	0.391439		3.43839	2.00268	46.9026	16.9263		3.2432	1.56135	4.06658	2.57668	2.86195	0.529892		3.6419	3.60042	10.2804	34.1826		3.08069	3.18502	0.18139	2.51511	2.24055	0.701985
2022/11/02 07:11:06	2022/11/21 07:13:25	5.0433	2.24004	12.4812	18.8244		4.50329	1.98019	1.46925	2.30265	2.56384	0.668858		2.69503	1.82804	16.6919	12.0823		2.40404	0.943763	1.7965	0.70649	1.4627	0.391439		3.43839	2.00268	46.9026	16.9263		3.2432	1.56135	4.06658	2.57668	2.86195	0.529892		3.6419	3.60042	10.2804	34.1826		3.08069	3.18502	0.18139	2.51511	2.24055	0.701985
[truncated: 2,177 more rows]
[truncated: 1 more columns]

## Sheet: Figure 3K-3L
		Absolute Food Intake (g)									Absolute Food Intake (g)									Absolute Food Intake (g)									Absolute Food Intake (g)
		Group 1		Group 2							Group 1		Group 2							Group 1		Group 2							Group 1		Group 2
[truncated: 3,202 more rows]
