# Supplementary material for: Glucagon-like peptide-1 receptor activation stimulates PKA-mediated phosphorylation of Raptor and this contributes to the weight loss effect of liraglutide
Source: eLife journal article supplement (doi:10.7554/elife.80944), 2023-11-06
Supplement: supp [file eLife PKA Manuscript Rev 2 Figure 3-figure supplement 1 Raw Data.xlsx]

## Sheet: Sheet1
Fig. 3-fig. supp. 1A			Fig. 3-fig. supp. 1B			Fig. 3-fig. supp. 1C
Baseline Blood Glucose (mg/dL)			Post-treatment Blood Glucose (mg/dL)			Post-treatment Plasma Insulin (ng/mL)
WT Saline	BG (mg/dL)		WT Saline	BG (mg/dL)		WT Saline	Insulin (ng/mL)
WT #1	154		WT #1	151		WT #1	1.04
WT #2	160		WT #2	166		WT #2	1.424
WT #3	133		WT #3	167		WT #3	0.923
WT #4	130		WT #4	129		WT #4	1.394
WT #5	131		WT #5	136		WT #5
MEAN	141.6		MEAN	149.8		MEAN	1.19525
SEM	6.37652		SEM	7.69025		SEM	0.125847
WT Liraglutide	BG (mg/dL)		WT Liraglutide	BG (mg/dL)		WT Liraglutide	Insulin (ng/mL)
WT #6	156		WT #6	140		WT #6	1.558
WT #7	155		WT #7	114		WT #7	1.496
WT #8	100		WT #8	109		WT #8	0.591
WT #9	145		WT #9	120		WT #9	0.837
WT #10	137		WT #10	120		WT #10
WT #11	148		WT #11	135		WT #11
WT #12	164		WT #12	143		WT #12
WT #13	149		WT #13	134		WT #13
MEAN	144.25		MEAN	126.875		MEAN	1.1205
SEM	6.93271		SEM	4.48982		SEM	0.240338
S791A Saline	BG (mg/dL)		S791A Saline	BG (mg/dL)		S791A Saline	Insulin (ng/mL)
S791A #1	147		S791A #1	162		S791A #1	1.587
S791A #2	160		S791A #2	171		S791A #2	0.934
S791A #3	161		S791A #3	151		S791A #3	0.68
S791A #4	161		S791A #4	133		S791A #4
S791A #5	123		S791A #5	147		S791A #5
S791A #6	146		S791A #6	143		S791A #6
MEAN	149.667		MEAN	151.167		MEAN	1.067
SEM	6.04244		SEM	5.55228		SEM	0.270141
S791A Liraglutide	BG (mg/dL)		S791A Liraglutide	BG (mg/dL)		S791A Liraglutide	Insulin (ng/mL)
S791A #7	142		S791A #7	140		S791A #7	0.697
S791A #8	152		S791A #8	130		S791A #8	1.46
S791A #9	153		S791A #9	118		S791A #9	0.913
S791A #10	144		S791A #10	131		S791A #10
S791A #11	141		S791A #11	137		S791A #11
S791A #12	153		S791A #12	129		S791A #12
S791A #13	165		S791A #13	135		S791A #13
MEAN	150		MEAN	131.429		MEAN	1.02333
SEM	3.19225		SEM	2.69795		SEM	0.227063
