# Supplementary material for: Glucagon-like peptide-1 receptor activation stimulates PKA-mediated phosphorylation of Raptor and this contributes to the weight loss effect of liraglutide
Source: eLife journal article supplement (doi:10.7554/elife.80944), 2023-11-06
Supplement: supp [file eLife PKA Manuscript Rev 2 Figure 4 Raw Data.xlsx]

## Sheet: Figure 4
	FIGURE 4A											FIGURE 4B											FIGURE 4C			FIGURE 4D		FIGURE 4E			FIGURE 4F		FIGURE 4G			FIGURE 4H		FIGURE 4I											FIGURE 4J
WT Saline	Body Weight (g)											Change in Body Weight (g)											Total Mass (g)			Change in Total Mass (g)		Fat Mass (g)			Change in Fat Mass (g)		Lean Mass (g)			Change in Lean Mass (g)		Change in Body Weight (g)											Change in Total Mass (g)
Day	0	1	2	3	4	5	6	7	8	9		0	1	2	3	4	5	6	7	8	9		Day 0	Day 9				Day 0	Day 9				Day 0	Day 9				0	1	2	3	4	5	6	7	8	9
80-2	35.9	36.3	36.5	36.2	36.6	36.9	37.2	37.6	37.8	37.7		0	0.4	0.6	0.3	0.7	1	1.3	1.7	1.9	1.8		35.9	37.7		1.8		16.459	18.95		2.491		17.507	16.54		-0.967
81-1	33.2	33	33.1	33.3	33.3	33.3	33.8	34.1	34.7	34.5		0	-0.2	-0.1	0.1	0.1	0.1	0.6	0.9	1.5	1.3		33.2	34.5		1.3		16.977	16.902		-0.075		19.111	19.861		0.75
81-2	37	37.1	37.3	37.4	38	38.4	38.6	39	39	38.6		0	0.1	0.3	0.4	1	1.4	1.6	2	2	1.6		37	38.6		1.6		19.157	18.487		-0.67		19.986	19.447		-0.539
81-3	42.2	42.3	41.8	41.6	42.1	42.7	42.6	42.8	43.1	42.6		0	0.1	-0.4	-0.6	-0.1	0.5	0.4	0.6	0.9	0.4		42.2	42.6		0.4		9.987	12.999		3.012		18.162	17.939		-0.223
81-4	37.8	37.7	38.2	38.2	38.4	39	39.5	39.4	39.4	39.1		0	-0.1	0.4	0.4	0.6	1.2	1.7	1.6	1.6	1.3		37.8	39.1		1.3		10.538	12.153		1.615		16.101	15.735		-0.366
87-1	41.2	41.3	41.2	41.5	41.4	40.8	40.9	41	41.5	42		0	0.1	0	0.3	0.2	-0.4	-0.3	-0.2	0.3	0.8		41.2	42		0.8		11.44	13.205		1.765		18.34	17.551		-0.789
87-4	44.5	43.8	43.9	44	43.2	43.4	43.8	43.7	44	44		0	-0.7	-0.6	-0.5	-1.3	-1.1	-0.7	-0.8	-0.5	-0.5		44.5	44		-0.5		11.498	12.197		0.699		21.462	21.856		0.394		0	-0.7	-0.6	-0.5	-1.3	-1.1	-0.7	-0.8	-0.5	-0.5		-0.5
87-5	47.1	46.7	46.5	45.9	45.6	45.5	45.2	45.7	45.3	45.8		0	-0.4	-0.6	-1.2	-1.5	-1.6	-1.9	-1.4	-1.8	-1.3		47.1	45.8		-1.3		10.883	12.006		1.123		19.003	19.211		0.208		0	-0.4	-0.6	-1.2	-1.5	-1.6	-1.9	-1.4	-1.8	-1.3		-1.3
89-10	45.3	45.4	45.4	45.8	46.6	46.6	47.1	47.2	46.7	46.4		0	0.1	0.1	0.5	1.3	1.3	1.8	1.9	1.4	1.1		45.3	46.4		1.1		18.978	20.313		1.335		18.378	18.612		0.234		0	0.1	0.1	0.5	1.3	1.3	1.8	1.9	1.4	1.1		1.1
MEAN	40.4667	40.4	40.4333	40.4333	40.5778	40.7333	40.9667	41.1667	41.2778	41.1889		0	-0.0666667	-0.0333333	-0.0333333	0.111111	0.266667	0.5	0.7	0.811111	0.722222		40.4667	41.1889		0.722222		13.9908	15.2458		1.255		18.6722	18.528		-0.144222		0	-0.333333	-0.366667	-0.4	-0.5	-0.466667	-0.266667	-0.1	-0.3	-0.233333		-0.233333
SEM	1.58096	1.53849	1.49071	1.4762	1.45074	1.42653	1.39214	1.37709	1.29334	1.32785		0	0.109291	0.144338	0.197203	0.321215	0.365908	0.422295	0.415999	0.422441	0.342287		1.58096	1.32785		0.342287		1.27422	1.12556		0.387512		0.503281	0.614919		0.192223		0	0.233333	0.233333	0.493288	0.90185	0.895048	1.08985	1.01489	0.929157	0.705534		0.705534
WT Liraglutide	Body Weight (g)											Body Weight Change (g)											Total Mass (g)			Total Mass Change (g)		Fat Mass (g)			Change in Fat Mass (g)		Lean Mass (g)			Change in Lean Mass (g)		Body Weight Change (g)											Change in Total Mass (g)
Day	0	1	2	3	4	5	6	7	8	9		0	1	2	3	4	5	6	7	8	9		Day 0	Day 9				Day 0	Day 9				Day 0	Day 9				0	1	2	3	4	5	6	7	8	9
80-3	36.2	34.5	33.2	32.8	32.3	32.4	32.3	31	32	32.1		0	-1.7	-3	-3.4	-3.9	-3.8	-3.9	-5.2	-4.2	-4.1		36.2	32.1		-4.1		15.718	13.342		-2.376		17.085	14.961		-2.124
81-3	35.3	33.2	32.9	32.8	32.7	33	32.8	32.5	32.4	32		0	-2.1	-2.4	-2.5	-2.6	-2.3	-2.5	-2.8	-2.9	-3.3		35.3	32		-3.3		17.722	13.249		-4.473		19.941	17.664		-2.277
79-2	34.9	32.5	32	31.6	31.6	31.3	31.2	30.9	30.8	30.6		0	-2.4	-2.9	-3.3	-3.3	-3.6	-3.7	-4	-4.1	-4.3		34.9	30.6		-4.3		19.741	15.783		-3.958		19.477	17.458		-2.019
79-3	38.4	36.3	35.9	35.3	34.9	34.4	33.7	33.5	33.3	32.8		0	-2.1	-2.5	-3.1	-3.5	-4	-4.7	-4.9	-5.1	-5.6		38.4	32.8		-5.6		17.119	14.372		-2.747		17.16	15.121		-2.039
79-4	40.7	37.2	36.3	35.2	33.6	32.4	32	31.6	31.3	30.9		0	-3.5	-4.4	-5.5	-7.1	-8.3	-8.7	-9.1	-9.4	-9.8		40.7	30.9		-9.8		11.426	8.935		-2.491		18.294	16.914		-1.38
87-2	40.4	38	37.3	36.2	36.4	36.1	34.8	34.8	35	35.6		0	-2.4	-3.1	-4.2	-4	-4.3	-5.6	-5.6	-5.4	-4.8		40.4	35.6		-4.8		11.641	10.677		-0.964		16.313	15.364		-0.949
87-3	46.1	43.4	42.5	41.7	41.3	40.3	39.3	38.5	38.7	38.6		0	-2.7	-3.6	-4.4	-4.8	-5.8	-6.8	-7.6	-7.4	-7.5		46.1	38.6		-7.5		12.051	10.06		-1.991		15.709	14.652		-1.057		0	-2.7	-3.6	-4.4	-4.8	-5.8	-6.8	-7.6	-7.4	-7.5		-7.5
87-6	48.1	45.6	44.2	43.5	43.2	42	41.1	40.9	40.5	40.6		0	-2.5	-3.9	-4.6	-4.9	-6.1	-7	-7.2	-7.6	-7.5		48.1	40.6		-7.5		11.542	8.249		-3.293		18.835	17.039		-1.796		0	-2.5	-3.9	-4.6	-4.9	-6.1	-7	-7.2	-7.6	-7.5		-7.5
87-7	41.9	39.2	38.4	38.4	37.5	36.8	37.1	36.7	35.9	36.6		0	-2.7	-3.5	-3.5	-4.4	-5.1	-4.8	-5.2	-6	-5.3		41.9	36.6		-5.3		11.274	5.48		-5.794		20.945	18.512		-2.433
89-7	47	44.8	43.4	42.6	42.4	41.8	41.5	41	40.7	39.8		0	-2.2	-3.6	-4.4	-4.6	-5.2	-5.5	-6	-6.3	-7.2		47	39.8		-7.2		19.823	16.618		-3.205		18.814	16.275		-2.539		0	-2.2	-3.6	-4.4	-4.6	-5.2	-5.5	-6	-6.3	-7.2		-7.2
89-8	46.8	44.6	44	42.7	42.6	41.6	41.2	40.5	39.7	38.8		0	-2.2	-2.8	-4.1	-4.2	-5.2	-5.6	-6.3	-7.1	-8		46.8	38.8		-8		20.195	14.975		-5.22		18.983	16.946		-2.037		0	-2.2	-2.8	-4.1	-4.2	-5.2	-5.6	-6.3	-7.1	-8		-8
89-9	48.7	46.1	45	44.6	44.4	43.7	43.4	43.2	42.8	41.8		0	-2.6	-3.7	-4.1	-4.3	-5	-5.3	-5.5	-5.9	-6.9		48.7	41.8		-6.9		20.256	17.071		-3.185		19.904	17.617		-2.287		0	-2.6	-3.7	-4.1	-4.3	-5	-5.3	-5.5	-5.9	-6.9		-6.9
MEAN	42.0417	39.6167	38.7583	38.1167	37.7417	37.15	36.7	36.2583	36.0917	35.85		0	-2.425	-3.28333	-3.925	-4.3	-4.89167	-5.34167	-5.78333	-5.95	-6.19167		42.0417	35.85		-6.19167		15.709	12.4009		-3.30808		18.455	16.5436		-1.91142		0	-2.44	-3.52	-4.32	-4.56	-5.46	-6.04	-6.52	-6.86	-7.42		-7.42
SEM	1.49009	1.46027	1.40062	1.36003	1.3815	1.30015	1.27321	1.28319	1.21807	1.17005		0	0.128585	0.172694	0.231636	0.3179	0.434054	0.475691	0.478925	0.514855	0.554794		1.49009	1.17005		0.554794		1.11915	1.06155		0.396206		0.459025	0.36132		0.150289		0	0.102956	0.188149	0.0969536	0.136382	0.208806	0.355809	0.386523	0.326497	0.182757		0.182757
S791A Raptor Saline	Body Weight (g)											Body Weight Change (g)											Total Mass (g)			Total Mass Change (g)		Fat Mass (g)			Change in Fat Mass (g)		Lean Mass (g)			Change in Lean Mass (g)		Body Weight Change (g)											Total Mass Change (g)
Day	0	1	2	3	4	5	6	7	8	9		0	1	2	3	4	5	6	7	8	9		Day 0	Day 9				Day 0	Day 9				Day 0	Day 9				0	1	2	3	4	5	6	7	8	9
78-2	37.1	37	36.4	36.9	37.5	37.2	37.6	38.4	38.8	38.6		0	-0.1	-0.7	-0.2	0.4	0.1	0.5	1.3	1.7	1.5		37.1	38.6		1.5		21.148	21.648		0.5		20.999	20.199		-0.8
78-3	42.4	43.1	42.4	43.3	43.4	43.4	44	44.1	44.3	44.4		0	0.7	0	0.9	1	1	1.6	1.7	1.9	2		42.4	44.4		2		21.083	20.927		-0.156		20.641	19.85		-0.791
84-3	51	51.4	51.2	51.1	51	50.3	50.5	50.7	50.7	50.4		0	0.4	0.2	0.1	0	-0.7	-0.5	-0.3	-0.3	-0.6		51	50.4		-0.6		20.947	20.687		-0.26		19.755	19.418		-0.337		0	0.4	0.2	0.1	0	-0.7	-0.5	-0.3	-0.3	-0.6		-0.6
86-2	50.6	50.4	50.1	50.1	49.5	49.5	49.2	49.4	49	49.2		0	-0.2	-0.5	-0.5	-1.1	-1.1	-1.4	-1.2	-1.6	-1.4		50.6	49.2		-1.4		20.521	20.581		0.06		19.232	18.511		-0.721		0	-0.2	-0.5	-0.5	-1.1	-1.1	-1.4	-1.2	-1.6	-1.4		-1.4
86-5	49.2	49.3	48.3	48.4	48	47.7	47.8	47.5	47.6	47.9		0	0.1	-0.9	-0.8	-1.2	-1.5	-1.4	-1.7	-1.6	-1.3		49.2	47.9		-1.3		18.634	17.68		-0.954		21.042	21.277		0.235		0	0.1	-0.9	-0.8	-1.2	-1.5	-1.4	-1.7	-1.6	-1.3		-1.3
88-2	48.3	47.9	48.1	48	47.6	47	47.3	47.3	47	47.1		0	-0.4	-0.2	-0.3	-0.7	-1.3	-1	-1	-1.3	-1.2		48.3	47.1		-1.2		11.895	14.192		2.297		17.798	17.46		-0.338		0	-0.4	-0.2	-0.3	-0.7	-1.3	-1	-1	-1.3	-1.2		-1.2
88-4	49.4	49.1	49.5	49	48.8	48.2	48.2	48	48.1	47.8		0	-0.3	0.1	-0.4	-0.6	-1.2	-1.2	-1.4	-1.3	-1.6		49.4	47.8		-1.6		15.097	17.046		1.949		19.472	19.122		-0.35		0	-0.3	0.1	-0.4	-0.6	-1.2	-1.2	-1.4	-1.3	-1.6		-1.6
MEAN	46.8571	46.8857	46.5714	46.6857	46.5429	46.1857	46.3714	46.4857	46.5	46.4857		0	0.0285714	-0.285714	-0.171429	-0.314286	-0.671429	-0.485714	-0.371429	-0.357143	-0.371429		46.8571	46.4857		-0.371429		18.475	18.9659		0.490857		19.8484	19.4053		-0.443143		0	-0.08	-0.26	-0.38	-0.72	-1.16	-1.1	-1.12	-1.22	-1.22		-1.22
SEM	1.95349	1.93063	2.00377	1.87964	1.74981	1.71429	1.64646	1.5531	1.48035	1.49067		0	0.150735	0.159506	0.206691	0.307392	0.342758	0.430077	0.511633	0.581401	0.562611		1.95349	1.49067		0.562611		1.37127	1.0321		0.453659		0.43946	0.462791		0.139423		0	0.146287	0.201494	0.146287	0.213073	0.132665	0.167332	0.235372	0.239583	0.168523		0.168523
S791A Raptor Liraglutide	Body Weight (g)											Body Weight Change (g)											Total Mass (g)			Total Mass Change (g)		Fat Mass (g)			Change in Fat Mass (g)		Lean Mass (g)			Change in Lean Mass (g)		Body Weight Change (g)											Total Mass Change (g)
Day	0	1	2	3	4	5	6	7	8	9		0	1	2	3	4	5	6	7	8	9		Day 0	Day 9				Day 0	Day 9				Day 0	Day 9				0	1	2	3	4	5	6	7	8	9
77-1	39.8	36.3	36.8	36.4	35.9	35.6	35.5	35.4	35.1	34.1		0	-3.5	-3	-3.4	-3.9	-4.2	-4.3	-4.4	-4.7	-5.7		39.8	34.1		-5.7		21.437	17.029		-4.408		19.883	17.459		-2.424
77-2	38	35.9	35.2	35.1	34.8	34.6	34.3	34.5	34.2	34.7		0	-2.1	-2.8	-2.9	-3.2	-3.4	-3.7	-3.5	-3.8	-3.3		38	34.7		-3.3		19.987	15.016		-4.971		20.916	17.606		-3.31
77-3	37.4	35.4	34.8	34.3	34.4	34.5	34.1	34.2	34.3	34.5		0	-2	-2.6	-3.1	-3	-2.9	-3.3	-3.2	-3.1	-2.9		37.4	34.5		-2.9		21.767	17.218		-4.549		20.808	17.851		-2.957
78-1	43.2	40.4	40.9	40.5	40.2	40	39	39.3	39.3	38.7		0	-2.8	-2.3	-2.7	-3	-3.2	-4.2	-3.9	-3.9	-4.5		43.2	38.7		-4.5		19.192	14.365		-4.827		22	19.834		-2.166
84-1	49.8	47.7	46.6	45.9	44.5	43.3	42.6	42.2	42.2	41.8		0	-2.1	-3.2	-3.9	-5.3	-6.5	-7.2	-7.6	-7.6	-8		49.8	41.8		-8		18.009	14.739		-3.27		20.046	17.235		-2.811		0	-2.1	-3.2	-3.9	-5.3	-6.5	-7.2	-7.6	-7.6	-8		-8
84-2	50	46.9	45.5	44.6	42.8	41.9	41	41	40.3	40.2		0	-3.1	-4.5	-5.4	-7.2	-8.1	-9	-9	-9.7	-9.8		50	40.2		-9.8		15.461	12.822		-2.639		17.178	15.288		-1.89		0	-3.1	-4.5	-5.4	-7.2	-8.1	-9	-9	-9.7	-9.8		-9.8
86-1	51	49.1	48.1	47.3	46.6	45.7	45.1	44.1	43.5	43.3		0	-1.9	-2.9	-3.7	-4.4	-5.3	-5.9	-6.9	-7.5	-7.7		51	43.3		-7.7		13.324	11.409		-1.915		17.201	16.036		-1.165		0	-1.9	-2.9	-3.7	-4.4	-5.3	-5.9	-6.9	-7.5	-7.7		-7.7
86-3	50.8	48.2	48.1	46.4	46	44.9	43.9	43.7	43.4	42.8		0	-2.6	-2.7	-4.4	-4.8	-5.9	-6.9	-7.1	-7.4	-8		50.8	42.8		-8		12.163	10.784		-1.379		17.989	17.151		-0.838		0	-2.6	-2.7	-4.4	-4.8	-5.9	-6.9	-7.1	-7.4	-8		-8
88-1	46.9	44.8	43.4	42.4	41.6	40.7	40.4	40	39.5	39.5		0	-2.1	-3.5	-4.5	-5.3	-6.2	-6.5	-6.9	-7.4	-7.4		46.9	39.5		-7.4		14.624	13.556		-1.068		19.381	17.701		-1.68		0	-2.1	-3.5	-4.5	-5.3	-6.2	-6.5	-6.9	-7.4	-7.4		-7.4
MEAN	45.2111	42.7444	42.1556	41.4333	40.7556	40.1333	39.5444	39.3778	39.0889	38.8444		0	-2.46667	-3.05556	-3.77778	-4.45556	-5.07778	-5.66667	-5.83333	-6.12222	-6.36667		45.2111	38.8444		-6.36667		17.3293	14.1042		-3.22511		19.4891	17.3512		-2.13789		0	-2.36	-3.36	-4.38	-5.4	-6.4	-7.1	-7.5	-7.92	-8.18		-8.18
SEM	1.89271	1.91493	1.81009	1.6964	1.58255	1.44386	1.37347	1.28233	1.24805	1.20809		0	0.187824	0.214159	0.290965	0.459502	0.589203	0.63705	0.699206	0.760442	0.793375		1.89271	1.20809		0.793375		1.185	0.74335		0.512202		0.569893	0.419211		0.27608		0	0.218174	0.315595	0.295635	0.480625	0.469042	0.522494	0.396232	0.446542	0.42		0.42
Average baseline weight
Liraglutide groups:	43.4
