# Supplementary material for: Glucagon-like peptide-1 receptor activation stimulates PKA-mediated phosphorylation of Raptor and this contributes to the weight loss effect of liraglutide
Source: eLife journal article supplement (doi:10.7554/elife.80944), 2023-11-06
Supplement: supp [file eLife PKA Manuscript Rev 2 Figure 4-figure supplement 1 Raw Data.xlsx]

## Sheet: Figure 4-figure supplement 1
	FIGURE 4-figure supplement 1A				FIGURE 4-figure supplement 1B		FIGURE 4-figure supplement 1C
WT Liraglutide	Body Weight (g)		Total Mass Change (g)		Body Weight (g)		Body Weight (g)
Day	0				0		0
80-3	36.2		4.1				36.2
81-3	35.3		3.3				35.3
79-2	34.9		4.3				34.9
79-3	38.4		5.6				38.4
79-4	40.7		9.8				40.7
87-2	40.4		4.8				40.4
87-3	46.1		7.5		46.1
87-6	48.1		7.5		48.1
87-7	41.9		5.3				41.9
89-7	47		7.2		47
89-8	46.8		8		46.8
89-9	48.7		6.9		48.7
MEAN	42.0417		6.19167		47.34		38.2571
SEM	1.49009		0.554794		0.467547		1.07013
S791A Raptor Liraglutide	Body Weight (g)		Total Mass Change (g)		Body Weight (g)		Body Weight (g)
Day	0				0		0
77-1	39.8		5.7				39.8
77-2	38		3.3				38
77-3	37.4		2.9				37.4
78-1	43.2		4.5				43.2
84-1	49.8		8		49.8
84-2	50		9.8		50
86-1	51		7.7		51
86-3	50.8		8		50.8
88-1	46.9		7.4		46.9
MEAN	45.2111		6.36667		49.7		39.6
SEM	1.89271		0.793375		0.736206		1.30384
