# Supplementary material for: Glucagon-like peptide-1 receptor activation stimulates PKA-mediated phosphorylation of Raptor and this contributes to the weight loss effect of liraglutide
Source: eLife journal article supplement (doi:10.7554/elife.80944), 2023-11-06
Supplement: supp [file eLife PKA Manuscript Rev 2 Figure 5 Raw Data.xlsx]

## Sheet: Figure 5A-5H
	FIGURE 5A											FIGURE 5B											FIGURE 5C			FIGURE 5D		FIGURE 5E			FIGURE 5F		FIGURE 5G			FIGURE 5H
WT Saline	Body Weight (g)											Change in Body Weight (g)											Total Mass (g)			Change in Total Mass (g)		Fat Mass (g)			Change in Fat Mass (g)		Lean Mass (g)			Change in Lean Mass (g)
Day	0	1	2	3	4	5	6	7	8	9		0	1	2	3	4	5	6	7	8	9		Day 0	Day 9				Day 0	Day 9				Day 0	Day 9
WT #1	32.1	31.7	31.6	31.1	31.1	30.8	31.2	31.3	31.8	31		0	-0.4	-0.5	-1	-1	-1.3	-0.9	-0.8	-0.3	-1.1		32.1	31		-1.1		8.543	8.689		0.146		17.073	16.408		-0.665
WT #2	29.1	29.5	29.2	29.6	29.7	29	29.5	29.8	30.3	30.6		0	0.4	0.1	0.5	0.6	-0.1	0.4	0.7	1.2	1.5		29.1	30.6		1.5		7.166	7.492		0.326		16.199	16.185		-0.014
WT #3	25.9	26.1	25.4	25.6	25.6	25.3	25.2	25.8	25.8	25.5		0	0.2	-0.5	-0.3	-0.3	-0.6	-0.7	-0.1	-0.1	-0.4		25.9	25.5		-0.4		5.049	5.16		0.111		15.13	15.045		-0.085
WT #4	23.2	22.6	23	23.1	22.6	22.9	22.8	22.9	23	22.7		0	-0.6	-0.2	-0.1	-0.6	-0.3	-0.4	-0.3	-0.2	-0.5		23.2	22.7		-0.5		2.897	3.019		0.122		14.96	14.764		-0.196
WT #5	25.2	25.1	25	25.2	25.1	25.6	25.7	25.7	25.7	26		0	-0.1	-0.2	0	-0.1	0.4	0.5	0.5	0.5	0.8		25.2	26		0.8		2.565	4.56		1.995		16.579	15.919		-0.66
WT #6	25.2	25.1	25	25.2	25.1	25.6	25.7	25.7	25.7	26		0	-0.1	-0.2	0	-0.1	0.4	0.5	0.5	0.5	0.8		25.2	26		0.8		2.798	2.969		0.171		16.372	15.554		-0.818
MEAN	26.7833	26.6833	26.5333	26.6333	26.5333	26.5333	26.6833	26.8667	27.05	26.9667		0	-0.1	-0.25	-0.15	-0.25	-0.25	-0.1	0.0833333	0.266667	0.183333		26.7833	26.9667		0.183333		4.83633	5.31483		0.4785		16.0522	15.6458		-0.406333
SEM	1.31995	1.35559	1.30707	1.24383	1.30809	1.16552	1.25895	1.26298	1.35074	1.31267		0	0.150555	0.0921954	0.201246	0.220227	0.26426	0.262043	0.237229	0.234758	0.406134		1.31995	1.31267		0.406134		1.03741	0.957298		0.304975		0.340917	0.264152		0.141674
WT Setmelanotide	Body Weight (g)											Body Weight Change (g)											Total Mass (g)			Total Mass Change (g)		Fat Mass (g)			Change in Fat Mass (g)		Lean Mass (g)			Change in Lean Mass (g)
Day	0	1	2	3	4	5	6	7	8	9		0	1	2	3	4	5	6	7	8	9		Day 0	Day 9		Day 14		Day 0	Day 9				Day 0	Day 9
WT #14	31.1	29.1	28.9	28.4	28	27.4	27.9	28	28.3	27.9		0	-2	-2.2	-2.7	-3.1	-3.7	-3.2	-3.1	-2.8	-3.2		31.1	27.9		-3.2		8.424	6.669		-1.755		16.347	15.93		-0.417
WT #15	28	26.3	25.9	25.9	25	24.7	25	24.7	25	24.6		0	-1.7	-2.1	-2.1	-3	-3.3	-3	-3.3	-3	-3.4		28	24.6		-3.4		6.392	4.586		-1.806		15.746	14.978		-0.768
WT #16	32	30.3	29.9	29.9	28.7	28.8	28.6	28.6	28.4	28.7		0	-1.7	-2.1	-2.1	-3.3	-3.2	-3.4	-3.4	-3.6	-3.3		32	28.7		-3.3		9.29	6.601		-2.689		16.579	15.715		-0.864
WT #17	26.5	25.3	24.4	24.8	24.9	25	25.5	25.4	25.5	25.1		0	-1.2	-2.1	-1.7	-1.6	-1.5	-1	-1.1	-1	-1.4		26.5	25.1		-1.4		5.087	4.684		-0.403		15.796	15.291		-0.505
WT #18	23	22	21.8	21.8	22.1	22	22.1	22.2	22.1	22.2		0	-1	-1.2	-1.2	-0.9	-1	-0.9	-0.8	-0.9	-0.8		23	22.2		-0.8		1.796	2.302		0.506		15.597	15.114		-0.483
WT #19	26.4	24.8	24.7	24.8	24.9	25.3	25	25.6	25.3	25.3		0	-1.6	-1.7	-1.6	-1.5	-1.1	-1.4	-0.8	-1.1	-1.1		26.4	25.3		-1.1		2.417	2.534		0.117		17.439	16.825		-0.614
WT #20	22.3	21.6	21.7	22.2	22.4	22.4	22.3	22.2	21.4	20.4		0	-0.7	-0.6	-0.1	0.1	0.1	0	-0.1	-0.9	-1.9		22.3	20.4		-1.9		3.236	3.731		0.495		13.94	12.949		-0.991
MEAN	27.0429	25.6286	25.3286	25.4	25.1429	25.0857	25.2	25.2429	25.1429	24.8857		0	-1.41429	-1.71429	-1.64286	-1.9	-1.95714	-1.84286	-1.8	-1.9	-2.15714		27.0429	24.8857		-2.15714		5.23457	4.44386		-0.790714		15.9206	15.2574		-0.663143
SEM	1.39299	1.23938	1.20371	1.12779	0.947894	0.926958	0.939098	0.949149	1.02373	1.10484		0	0.173793	0.228274	0.313093	0.484522	0.545046	0.507025	0.531843	0.446148	0.423622		1.39299	1.10484		0.423622		1.10988	0.662349		0.48484		0.408083	0.451126		0.0815462
S791A Raptor Saline	Body Weight (g)											Body Weight Change (g)											Total Mass (g)			Total Mass Change (g)		Fat Mass (g)			Change in Fat Mass (g)		Lean Mass (g)			Change in Lean Mass (g)
Day	0	1	2	3	4	5	6	7	8	9		0	1	2	3	4	5	6	7	8	9		Day 0	Day 9		Day 14		Day 0	Day 9				Day 0	Day 9
RapKI #1	29.1	29.1	28.8	28.9	29	29	29.5	29.3	29.6	29.3		0	0	-0.3	-0.2	-0.1	-0.1	0.4	0.2	0.5	0.2		29.1	29.3		0.2		5.95	6.504		0.554		16.6	16.774		0.174
RapKI #2	28	28.5	28.3	28.6	28.4	28.4	28.6	28.9	29.2	29.2		0	0.5	0.3	0.6	0.4	0.4	0.6	0.9	1.2	1.2		28	29.2		1.2		6.367	7.612		1.245		16.02	15.375		-0.645
RapKI #3	30.1	30.4	29.7	29.9	30.2	29.7	29.9	30.5	30.9	31.1		0	0.3	-0.4	-0.2	0.1	-0.4	-0.2	0.4	0.8	1		30.1	31.1		1		7.267	7.814		0.547		16.976	16.282		-0.694
RapKI #4	30	30.8	30.7	30.4	30.2	30.1	30.8	31	32	31.7		0	0.8	0.7	0.4	0.2	0.1	0.8	1	2	1.7		30	31.7		1.7		7.736	9.367		1.631		16.199	15.837		-0.362
RapKI #5	25.8	25.8	25.8	26	26	26.2	26.2	26.2	26.1	26.5		0	0	0	0.2	0.2	0.4	0.4	0.4	0.3	0.7		25.8	26.5		0.7		3.628	4.915		1.287		15.919	15.735		-0.184
MEAN	28.6	28.92	28.66	28.76	28.76	28.68	29	29.18	29.56	29.56		0	0.32	0.06	0.16	0.16	0.08	0.4	0.58	0.96	0.96		28.6	29.56		0.96		6.1896	7.2424		1.0528		16.3428	16.0006		-0.3422
SEM	0.795613	0.885099	0.823772	0.763282	0.773046	0.685128	0.784219	0.837496	0.996293	0.908625		0	0.152971	0.201494	0.16	0.0812404	0.152971	0.167332	0.156205	0.300998	0.2502		0.795613	0.908625		0.2502		0.714241	0.73957		0.215724		0.196415	0.241456		0.159269
S791A Raptor Setmelanotide	Body Weight (g)											Body Weight Change (g)											Total Mass (g)			Total Mass Change (g)		Fat Mass (g)			Change in Fat Mass (g)		Lean Mass (g)			Change in Lean Mass (g)
Day	0	1	2	3	4	5	6	7	8	9		0	1	2	3	4	5	6	7	8	9		Day 0	Day 9		Day 14		Day 0	Day 9				Day 0	Day 9
RapKI #14	31.9	30.3	29	29.6	29.2	29.1	29.2	29.8	29.6	29.8		0	-1.6	-2.9	-2.3	-2.7	-2.8	-2.7	-2.1	-2.3	-2.1		31.9	29.8		-2.1		7.47	5.819		-1.651		17.358	17.264		-0.094
RapKI #15	27	25.7	25.8	26.1	26.1	26.2	26.5	26.6	27.2	26.6		0	-1.3	-1.2	-0.9	-0.9	-0.8	-0.5	-0.4	0.2	-0.4		27	26.6		-0.4		5.251	4.524		-0.727		16.139	16.448		0.309
RapKI #16	30.4	29.2	28.6	28.2	28.3	28.5	28.2	29	29.1	28.4		0	-1.2	-1.8	-2.2	-2.1	-1.9	-2.2	-1.4	-1.3	-2		30.4	28.4		-2		7.651	6.145		-1.506		16.402	15.762		-0.64
RapKI #17	25.4	23.7	23.6	24.3	24.3	24.6	24	24.9	24.4	24.8		0	-1.7	-1.8	-1.1	-1.1	-0.8	-1.4	-0.5	-1	-0.6		25.4	24.8		-0.6		3.252	3.624		0.372		15.887	15.365		-0.522
RapKI #18	31	29.6	28.6	28.2	28.6	28.5	28.9	29.1	28.2	28.1		0	-1.4	-2.4	-2.8	-2.4	-2.5	-2.1	-1.9	-2.8	-2.9		31	28.1		-2.9		6.908	5.637		-1.271		16.979	16.228		-0.751
MEAN	28.45	27.05	26.65	26.7	26.825	26.95	26.9	27.4	27.225	26.975		0	-1.4	-1.8	-1.75	-1.625	-1.5	-1.55	-1.05	-1.225	-1.475		28.45	26.975		-1.475		5.7655	4.9825		-0.783		16.3517	15.9508		-0.401
SEM	1.34505	1.41921	1.21209	0.940744	1.00943	0.952628	1.09011	1.01407	1.01848	0.825		0	0.108012	0.244949	0.451848	0.368273	0.422295	0.392641	0.361709	0.616948	0.593542		1.34505	0.825		0.593542		0.976508	0.565355		0.418134		0.234027	0.242015		0.24124
