# Supplementary material for: Glucagon-like peptide-1 receptor activation stimulates PKA-mediated phosphorylation of Raptor and this contributes to the weight loss effect of liraglutide
Source: eLife journal article supplement (doi:10.7554/elife.80944), 2023-11-06
Supplement: supp [file elife-80944-supp-v1.zip]

Figure 3-figure supplement 2

A

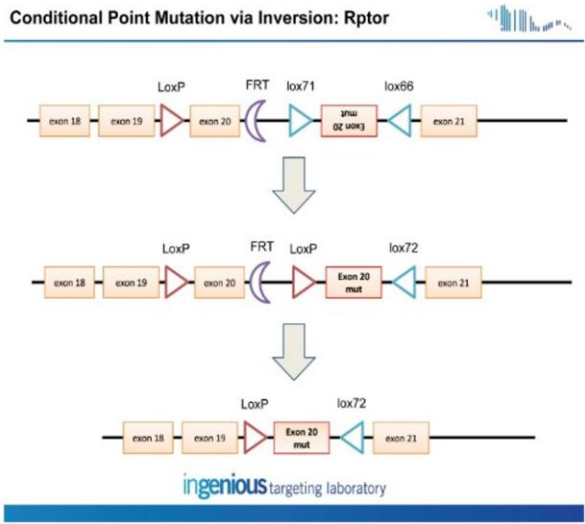

B

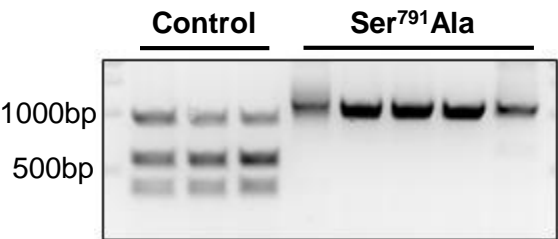

**SacI**

Control DNA sequence: CGGCGTGTGAGCTCC

Ser<sup>791</sup>Ala DNA sequence: CGGCGTGTGGCCTCC
